# Supplementary material for: Comprehensive Transcriptomic and Metabolic Profiling of Agrobacterium-tumefaciens-Infected Immature Wheat Embryos
Source: MDPI journal article supplement (doi:10.3390/ijms24098449), 2023-05-08
Supplement: s1 [file s1]

The following methods are derived from PureWheat technique developed by Ishida et al. (Ishida, Y.; Tsunashima, M.; Hiei, Y.; Komari, T. Wheat (*Triticum aestivum* L.) transformation using immature embryos. *Methods in molecular biology* (Clifton, N.J.) **2015**, 1223, 189-198.)

### **Preparation of Inoculum**

1. Culture *A. tumefaciens* in 10 ml MG/L medium overnight at 28 °C with vigorous shaking.
2. Collect bacteria by centrifugation and resuspend at the cell density of 0.4 of A 660 in WLS-inf medium.

#### **3.1.2 Preparation of Immature Embryos**

1. Collect immature seeds at the right developmental stage from panicles about 14 days after anthesis (DAA)
2. Remove glume, lemma, and palea with forceps.
3. Sterilize immature seeds with 70 % ethanol for 1 min and 1 % sodium hypochlorite for 10 min, and then wash 3 times with sterilized distilled water.
4. Isolate immature embryos from the immature seeds on the clean bench.
5. Transfer the embryos into 2.0 ml of WLS-liq medium in a 2.0 ml micro-centrifuge tube at room temperature, each tube contains 25 embryos.
6. Invert the micro-centrifuge tube several times and remove the medium.
7. Add 2.0 ml of WLS-liq medium.

Agrobacterium multiplication (MG/L): Add 5 g mannitol, 1 g L-glutamic acid, 250 mg  $\text{KH}_2\text{PO}_4$ , 100 mg NaCl, 100 mg  $\text{MgSO}_4 \cdot 7\text{H}_2\text{O}$ , 5 g tryptone, 2.5 g yeast extract, and 1  $\mu\text{g}$  biotin to 700 ml of distilled water and make up the volume to 1,000 ml. Adjust pH to 7.0. Sterilize using a 0.22  $\mu\text{m}$  cellulose acetate filter and store at 4 °C.

### **Pretreatment and Cocultivation**

1. Centrifuge the micro-centrifuge tube with a fixed-angle rotor with a maximum radius of 83 mm at  $20,000 \times g$  at 4 °C for 10 min
2. Remove the medium from the micro-centrifuge tube and add 1.0 ml inoculum.
3. Invert the micro-centrifuge tube frequently for 30 s.
4. Incubate at room temperature for 5 min.
5. Transfer the immature embryos to WLS-AS medium with the scutellum side up
6. Immature embryos were collected and named T1 or CK1 after one day incubation

in 23°C darkness, Immature embryos were collected and named T2 or CK2 after incubation in the dark for two days.

### **Stock Solutions**

1. LS major salts (10×): Dissolve 19.0 g KNO<sub>3</sub>, 16.5 g NH<sub>4</sub>NO<sub>3</sub>, 4.4 g CaCl<sub>2</sub>·2H<sub>2</sub>O, 3.7 g MgSO<sub>4</sub>·7H<sub>2</sub>O, and 1.7 g KH<sub>2</sub>PO<sub>4</sub> in 900 ml distilled water and fill to 1,000 ml. Store at 4 °C.
2. Ethylenediamine-tetraacetic acid-iron (FeEDTA, 100×): Dissolve 2.78 g FeSO<sub>4</sub>·7H<sub>2</sub>O in 900 ml of hot distilled water and add 3.73 g ethylenediamine- N, N, N', N'-tetraacetic acid, disodium salt. Cool and fill to 1,000 ml. Store at 4 °C.
3. LS minor salts (100×): Dissolve 2.23 g MnSO<sub>4</sub>·5H<sub>2</sub>O, 1.06 g ZnSO<sub>4</sub>·7H<sub>2</sub>O, 620 mg H<sub>3</sub>BO<sub>3</sub>, 83 mg KI, 25.0 mg Na<sub>2</sub>MoO<sub>4</sub> ·2H<sub>2</sub>O, 2.5 mg CuSO<sub>4</sub>·5H<sub>2</sub>O, and 2.5 mg CoCl<sub>2</sub>·6H<sub>2</sub>O in 900 ml of distilled water and fill to 1,000 ml. Store at 4 °C.
4. MS vitamins (100×): Dissolve 10 g myoinositol, 0.2 g glycine, 100 mg thiamine hydrochloride, 50 mg pyridoxine hydrochloride, and 50 mg nicotinic acid.
5. Modified LS vitamins (100×): Dissolve 10 g myoinositol, 100 mg thiamine hydrochloride, 50 mg pyridoxine hydrochloride, and 50 mg nicotinic acid in 900 ml of distilled water and fill to 1,000 ml. Store at 4 °C.

### **Media Composition**

1. Agrobacterium multiplication (MG/L): Add 5 g mannitol, 1 g L -glutamic acid, 250 mg KH<sub>2</sub>PO<sub>4</sub>, 100 mg NaCl, 100 mg MgSO<sub>4</sub> ·7H<sub>2</sub>O, 5 g tryptone, 2.5 g yeast extract, and 1 µg biotin to 700 ml of distilled water and make up the volume to 1,000 ml. Adjust pH to 7.0. Sterilize using a 0.22 µm cellulose acetate filter and store at 4 °C.
2. Embryo collection (WLS-liq): Add 10 ml of the 10× LS major salts, 1 ml of 100× FeEDTA, 1 ml of 100× LS minor salts and 1 ml of 100× MS vitamins, 10 g glucose, and 0.5 g 2-(N-morpholino) ethanesulfonic acid (MES) to 700 ml of distilled water and make up the volume to 1,000 ml. Adjust pH to 5.8. Sterilize using a 0.22 µm cellulose acetate filter and store at 4 °C.
3. Inoculum (WLS-inf): WLS-liq plus 100 µM acetosyringone.
4. Cocultivation (WLS-AS): WLS-inf plus 0.85 mg/l AgNO<sub>3</sub>, 1.25 mg/l CuSO<sub>4</sub> ·5H<sub>2</sub>O, and 8 g/l agarose.
