# Supplementary material for: Comprehensive Transcriptomic and Metabolic Profiling of Agrobacterium-tumefaciens-Infected Immature Wheat Embryos
Source: MDPI journal article supplement (doi:10.3390/ijms24098449), 2023-05-08
Supplement: s1 [file s1]

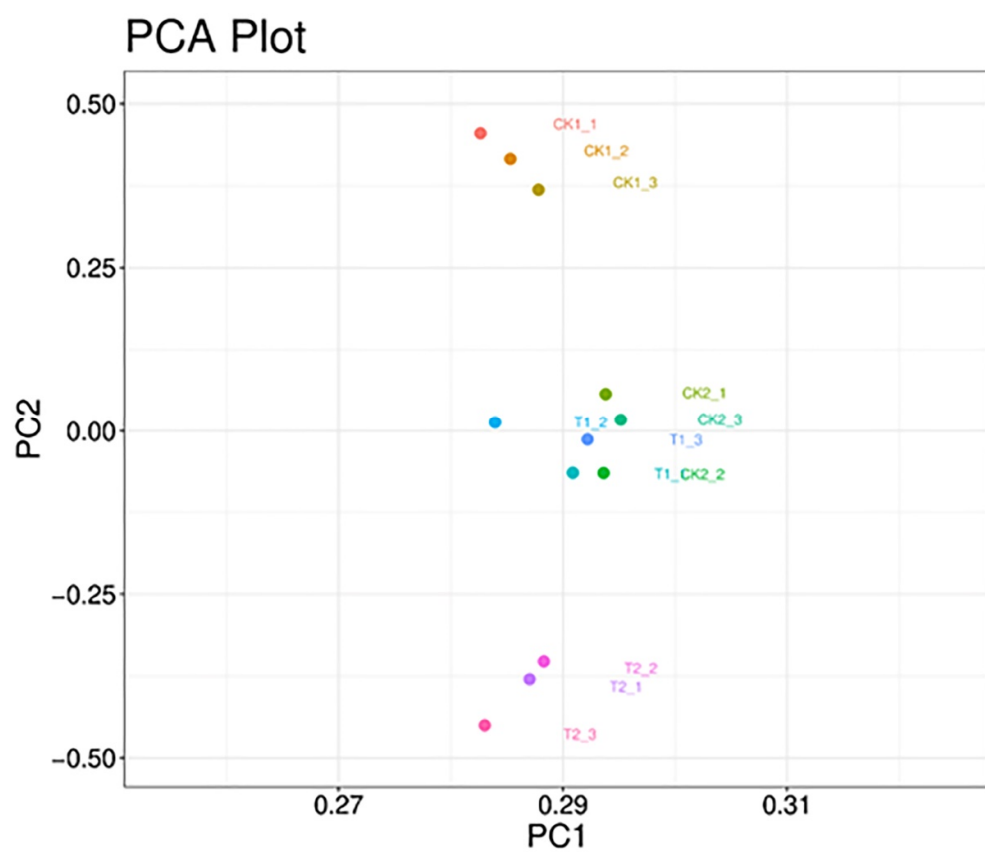

Figure S1. The PCA analysis of RNA-seq data

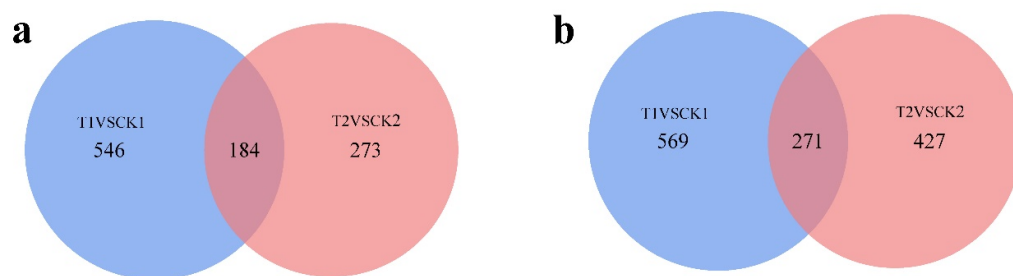

Figure S2. (a) Venn diagram of upregulated DEGs revealed in pair-wise comparisons; (b) Venn diagram of downregulated DEGs revealed in pair-wise comparisons

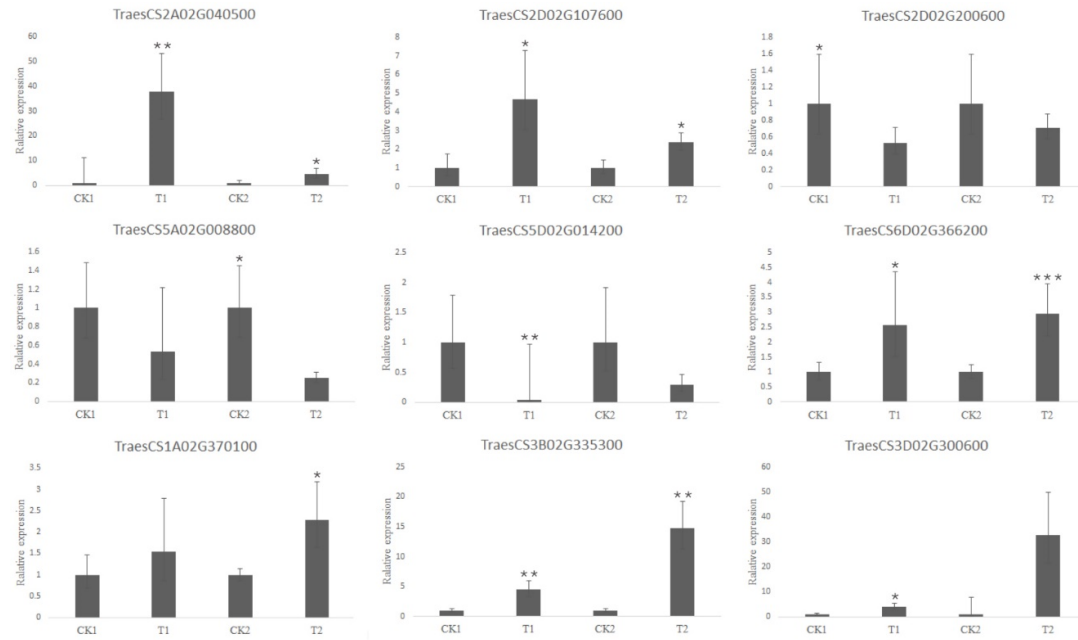

Figure S3. qRT-PCR validation of the DEGs of young embryos infected with *Agrobacterium tumefaciens*. \* indicates significant difference at  $p < 0.05$ , \*\* indicates significant difference at  $p < 0.01$ , and \*\*\* indicates significant difference at  $p < 0.001$ .

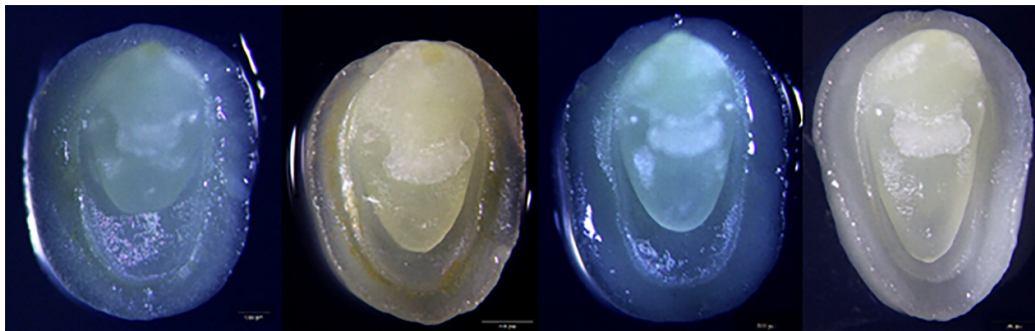

Figure S4. Wheat immature embryo of 2-2.5 mm in length used in the study
