# Supplementary material for: Comprehensive Transcriptomic and Metabolic Profiling of Agrobacterium-tumefaciens-Infected Immature Wheat Embryos
Source: Int J Mol Sci. 2023 May 8;24(9):8449. doi: 10.3390/ijms24098449 (PMC10179373; doi:10.3390/ijms24098449)
Supplement: Supplementary file 1 [file ijms-24-08449-s001.zip › Supplementary file S2.xls]

## Sheet: S1
Table S1. Summary of the RNA sequencing data of 4 wheat RNA libraries
code	Total Raw Data		Total Clean Data		Valid Ratio(reads;%)	GC content(%)	Q20%	Q30(%)
	read (no.)	base(bp)	read (no.)	base(bp)
CK1	73174653	10.98G	69898136	10.48G	95.52	51	99.9333	97.4233
CK2	75342269	11.3G	71543825	10.73G	94.96	51.5	99.9367	97.78
T1	71580265	10.74G	65160259	9.78G	91.03	51.5	99.94	97.4867
T2	72900690	10.93G	68953701	10.34G	94.59	51.5	99.9367	97.66

## Sheet: S2
Table S2. The number of Differentially expressed genes in young embryos infected with Agrobacterium tumefaciens
Comparison	All DEGs (no.)	downregulated DEG	Upregulated DEGs(no.)
T1 vs. CK1	1570	840	730
T2 vs. CK2	1155	457	698

## Sheet: S3
Table S3. Differentially expressed genes between CK1 and T1
gene_id	FPKM.T1_1	FPKM.T1_2	FPKM.T1_3	FPKM.CK1_2	FPKM.CK1_1	FPKM.CK1_3	fc	log2(fc)	pval	qval	regulation	significant
TraesCS3D02G258900	6.31776	6.97784	6.33797	49.6458	46.199	59.4181	0.126454	-2.98332	5.09463e-110	2.02305e-105	down	yes
TraesCS3B02G291700	11.8526	10.2369	9.7363	58.3759	55.9341	65.1751	0.177317	-2.4956	4.82654e-97	7.66639e-93	down	yes
TraesCS3A02G258800	8.18536	6.20677	5.80904	48.6705	44.4646	57.3442	0.134245	-2.89705	5.85363e-80	4.22627e-76	down	yes
TraesCS2B02G194200	7.95934	9.19671	10.9308	47.2959	46.1965	44.3205	0.203804	-2.29474	1.43389e-69	4.74491e-66	down	yes
TraesCS2B02G260800	4.27917	3.77967	4.18715	12.314	12.6514	11.6967	0.334023	-1.58198	4.48911e-57	8.91302e-54	down	yes
TraesCS2A02G168200	9.39076	11.2639	13.7294	56.6043	57.3124	51.1287	0.20833	-2.26305	5.11474e-56	9.23198e-53	down	yes
TraesCS7B02G278200	0.682385	1.18378	1.16687	11.2319	13.2336	9.05965	0.0904704	-3.46641	5.71182e-50	9.45056e-47	down	yes
TraesCS4D02G038500	16.2506	17.7732	15.8452	51.953	52.7789	50.8144	0.320606	-1.64113	3.93649e-49	6.25265e-46	down	yes
TraesCS1B02G388700	5.65677	7.03195	6.19643	23.3684	26.4882	22.7467	0.260115	-1.94278	6.411e-49	9.98344e-46	down	yes
TraesCS1A02G369600	9.65852	9.9056	8.93283	29.8284	31.1815	27.3212	0.322615	-1.63211	3.56173e-45	4.35183e-42	down	yes
TraesCS2A02G235900	4.97608	4.98653	4.9027	13.9007	15.4199	13.3317	0.348523	-1.52067	1.37835e-44	1.58649e-41	down	yes
TraesCS5D02G173900	0.662508	0.693789	0.640973	4.67757	4.84769	5.40788	0.133747	-2.90242	4.4801e-44	5.01134e-41	down	yes
TraesCS7D02G236700	1.44445	1.50521	1.39753	6.68966	7.92117	5.89802	0.211966	-2.23809	6.79816e-43	7.10399e-40	down	yes
TraesCS3D02G359300	14.154	17.4797	15.4467	49.2482	52.9103	48.3621	0.312783	-1.67676	2.71665e-40	2.47993e-37	down	yes
TraesCS7B02G131400	2.56842	2.14858	2.7882	7.39167	8.25666	8.05818	0.316588	-1.65932	6.61827e-39	5.47517e-36	down	yes
TraesCS1B02G146200	9.32019	8.37792	8.98471	22.5251	23.6424	21.1973	0.396094	-1.33608	1.28785e-38	1.0228e-35	down	yes
TraesCS2D02G064900	1.00536	0.937383	1.24976	7.01752	5.4445	7.6332	0.158869	-2.65409	1.6458e-35	1.10769e-32	down	yes
TraesCS7A02G131200	9.10171	8.37883	9.76448	23.862	25.6013	21.6214	0.383276	-1.38354	4.76724e-35	3.129e-32	down	yes
TraesCS4A02G272900	40.3004	40.2331	38.0718	99.2853	91.6787	101.005	0.406226	-1.29965	1.71204e-34	1.05402e-31	down	yes
TraesCS6A02G380200	5.22383	4.50468	5.70631	14.6728	16.4616	13.6141	0.344923	-1.53565	6.59336e-34	3.85028e-31	down	yes
TraesCS2D02G361800	6.98854	6.78951	7.47525	21.2937	24.4716	19.3871	0.326209	-1.61613	9.67255e-34	5.5265e-31	down	yes
TraesCS2D02G241800	4.69581	5.16323	4.69989	12.3675	12.3495	12.307	0.393231	-1.34655	1.45244e-31	6.99099e-29	down	yes
TraesCS5A02G008800	9.99004	14.7812	9.69005	59.7234	45.4442	62.8641	0.205088	-2.28568	2.61223e-31	1.23488e-28	down	yes
TraesCS2D02G175600	2.32462	3.00749	4.99069	19.3571	18.8058	18.1216	0.183404	-2.4469	1.36721e-29	5.53993e-27	down	yes
TraesCS5B02G094600	11.3958	10.251	11.0962	24.2664	25.9851	22.8967	0.447626	-1.15963	3.1022e-28	1.11988e-25	down	yes
TraesCS5A02G008700	12.7824	15.7585	10.7499	55.4317	43.2131	63.7378	0.241965	-2.04713	6.86442e-28	2.39108e-25	down	yes
TraesCS6A02G185400	7.64772	7.28041	8.49614	18.1178	20.4093	17.2075	0.420283	-1.25057	6.41384e-27	2.00543e-24	down	yes
TraesCS1A02G129400	15.8749	14.4674	14.9425	30.1323	32.8389	30.7033	0.483427	-1.04863	3.10741e-26	9.34801e-24	down	yes
TraesCS1D02G375700	5.45075	7.52871	5.05736	21.0481	21.798	21.9467	0.278377	-1.84489	4.64137e-26	1.36019e-23	down	yes
TraesCS4A02G058000	8.02066	7.59875	8.92046	17.6474	18.4777	19.2861	0.442869	-1.17505	5.74747e-26	1.67201e-23	down	yes
TraesCS4B02G207100	0.132376	0.20115	0.0922071	3.15613	1.77715	5.40039	0.0411986	-4.60126	1.85991e-25	5.19408e-23	down	yes
TraesCS4D02G021400	0.58254	0.606265	0.370313	2.94972	3.88901	2.86393	0.16069	-2.63765	1.89604e-25	5.26508e-23	down	yes
TraesCS3B02G395900	4.91988	4.22798	5.71782	12.5986	12.6555	12.7928	0.390721	-1.35579	4.8877e-25	1.30699e-22	down	yes
TraesCS5D02G014200	29.0555	36.2366	26.7438	92.0753	84.6314	93.2169	0.34097	-1.55228	5.69385e-25	1.50733e-22	down	yes
TraesCS3B02G578000	1.22565	1.10549	2.30764	9.99791	8.22386	10.1266	0.163635	-2.61145	7.62313e-25	1.99809e-22	down	yes
TraesCS6D02G364900	5.84154	5.2717	6.69015	13.2121	14.2759	13.506	0.434292	-1.20326	8.06716e-24	1.87884e-21	down	yes
TraesCS1A02G258800	9.23152	7.95507	7.66788	20.076	21.9519	19.0587	0.406872	-1.29735	2.4873e-23	5.51784e-21	down	yes
TraesCS7D02G130500	9.43646	8.37798	9.79874	19.7269	22.285	18.7402	0.454522	-1.13758	2.71688e-23	6.01035e-21	down	yes
TraesCS7B02G031500	11.2223	9.46187	11.2812	22.3851	23.97	21.5514	0.470727	-1.08704	2.80529e-23	6.18871e-21	down	yes
TraesCS3A02G363700	5.42242	4.4199	6.28052	14.117	13.734	13.333	0.391483	-1.35298	6.08781e-23	1.3032e-20	down	yes
TraesCS4B02G267200	2.3368	2.92499	3.42325	11.4163	15.1427	8.78436	0.245733	-2.02483	4.82437e-22	9.25474e-20	down	yes
TraesCS7A02G204800	7.82037	7.59942	7.34602	19.8633	19.4466	16.5945	0.407228	-1.29609	4.89325e-22	9.36426e-20	down	yes
TraesCS6B02G419000	5.73155	5.51818	7.74803	16.232	18.1241	15.8423	0.378453	-1.40181	8.20473e-22	1.5332e-19	down	yes
TraesCS1D02G125300	11.915	10.1265	10.1668	22.6794	25.6675	22.2064	0.45651	-1.13128	4.10176e-21	7.14382e-19	down	yes
TraesCS1B02G049200	1.75578	1.4668	1.8237	5.56265	5.33239	5.95064	0.299559	-1.73909	5.6279e-21	9.61209e-19	down	yes
TraesCS4A02G038500	3.35304	2.42038	4.44566	14.4344	19.8916	10.9421	0.225746	-2.14723	6.57773e-21	1.11623e-18	down	yes
TraesCS7B02G290200	0.320177	0.500663	0.473866	4.07682	3.96557	3.43985	0.112757	-3.14871	1.46587e-20	2.40037e-18	down	yes
TraesCS2B02G382000	6.20657	6.79186	6.02522	19.203	16.3914	15.4049	0.373018	-1.42268	1.50245e-20	2.4552e-18	down	yes
TraesCS3A02G200400	7.31973	7.4502	7.11897	14.3738	16.5598	14.621	0.480498	-1.0574	3.24393e-20	5.12187e-18	down	yes
TraesCS2D02G461700	35.7565	36.5705	37.7321	77.5318	101.123	77.3502	0.42991	-1.21789	6.50207e-20	1.0066e-17	down	yes
TraesCS5A02G172700	4.5023	3.04691	4.95234	11.9771	12.846	12.3409	0.336388	-1.5718	1.08844e-19	1.64968e-17	down	yes
TraesCS3B02G412700	1.15293	1.20014	1.12844	3.12223	3.50975	3.25368	0.352177	-1.50563	1.45071e-19	2.16161e-17	down	yes
TraesCS5B02G386800	7.11729	6.39391	9.62167	20.4419	21.726	20.2491	0.370618	-1.432	1.56733e-19	2.32231e-17	down	yes
TraesCS1B02G332200	1.08162	0.807039	1.09583	4.21272	3.96812	3.70601	0.251074	-1.99381	2.66854e-19	3.903e-17	down	yes
TraesCS5B02G216000	2.41175	1.88477	3.38047	8.62665	9.15739	8.45655	0.292562	-1.77319	7.19344e-19	1.01114e-16	down	yes
TraesCS3D02G373300	2.38867	2.50658	2.68226	5.08572	6.24973	5.90883	0.439422	-1.18632	8.44691e-19	1.17692e-16	down	yes
TraesCS3B02G224600	7.91776	8.62572	8.299	17.7273	19.9242	16.3988	0.459617	-1.1215	1.21205e-18	1.66828e-16	down	yes
TraesCS2D02G126600	1.82855	1.50412	2.22812	4.95187	5.13241	6.34216	0.338527	-1.56266	1.38419e-18	1.89863e-16	down	yes
TraesCS7A02G348600	2.90307	3.04095	4.05471	8.95179	9.39226	9.42796	0.360029	-1.47382	1.49275e-18	2.03002e-16	down	yes
TraesCS2A02G461700	53.7111	57.8047	56.4559	110.985	142.931	114.974	0.455343	-1.13497	1.60516e-18	2.17543e-16	down	yes
TraesCS2A02G523300	6.16636	5.27608	5.80482	12.0043	11.9614	11.0575	0.492453	-1.02194	2.64119e-18	3.4902e-16	down	yes
TraesCS1D02G264100	10.891	12.2045	12.5589	23.3078	26.2045	23.7842	0.48644	-1.03967	2.79107e-18	3.66387e-16	down	yes
TraesCS2A02G364000	10.8847	10.7537	10.1528	27.3784	31.1275	22.0214	0.394787	-1.34085	3.43039e-18	4.45889e-16	down	yes
TraesCS1A02G143900	7.8969	6.68145	8.60416	15.8891	16.6464	17.2168	0.46596	-1.10172	6.37573e-18	8.03737e-16	down	yes
TraesCS2B02G341100	2.63634	2.32081	2.6429	6.59879	6.34675	7.1013	0.379115	-1.39929	6.41011e-18	8.0679e-16	down	yes
TraesCS1D02G298400	9.36831	11.0121	9.62078	21.0324	22.7249	21.1111	0.462493	-1.1125	8.0878e-18	1.00994e-15	down	yes
TraesCS3D02G359200	2.60731	3.53255	2.92058	8.0181	9.70846	7.77784	0.35525	-1.49309	1.39121e-17	1.69672e-15	down	yes
TraesCS1D02G142700	5.13382	4.53414	6.87835	14.4428	14.4352	14.0086	0.385815	-1.37402	1.91749e-17	2.31437e-15	down	yes
TraesCS3D02G046700	0.339711	0.240128	0.321453	2.47034	3.04325	2.44126	0.113301	-3.14177	2.51736e-17	2.97952e-15	down	yes
TraesCS6D02G368700	1.74879	1.03955	1.23983	5.62064	5.18286	4.39945	0.264959	-1.91616	2.90197e-17	3.39929e-15	down	yes
TraesCS1D02G226500	1.41745	1.03542	1.2489	2.93311	3.22981	2.87388	0.409634	-1.28759	3.43205e-17	3.97332e-15	down	yes
TraesCS5D02G177200	7.94024	6.37795	9.39614	18.3019	18.8936	18.5522	0.425386	-1.23315	6.55279e-17	7.34125e-15	down	yes
TraesCS1B02G288000	2.77532	2.4612	2.63962	5.79559	6.25021	5.80112	0.441317	-1.18011	1.61203e-16	1.70702e-14	down	yes
TraesCS5B02G502700	32.884	36.7932	37.6957	71.1689	68.2948	82.1749	0.48445	-1.04558	1.74185e-16	1.83713e-14	down	yes
TraesCS3D02G046800	0.376319	0.332267	0.396489	3.62491	4.40933	3.39855	0.0966584	-3.37096	2.38038e-16	2.47444e-14	down	yes
TraesCS5B02G232700	0.987765	0.861834	0.690245	3.57205	3.21855	5.01997	0.215048	-2.21727	2.99207e-16	3.0622e-14	down	yes
TraesCS3D02G357200	8.1463	6.63365	8.86133	15.3695	16.607	17.2871	0.479894	-1.05921	3.74126e-16	3.79473e-14	down	yes
TraesCS2B02G600200	0.590686	0.329715	0.132563	2.72573	2.94999	3.30362	0.117265	-3.09215	3.90679e-16	3.95756e-14	down	yes
TraesCS3D02G041500	0.871525	0.494599	1.39499	5.58323	6.91594	4.7101	0.160443	-2.63987	4.33863e-16	4.36193e-14	down	yes
TraesCS3B02G272100	0.326275	0.327982	0.581522	2.44127	2.28872	2.0395	0.182552	-2.45362	7.17501e-16	6.99216e-14	down	yes
TraesCS5B02G118000	2.32356	2.14765	2.33112	4.8509	4.93753	5.32512	0.450082	-1.15174	8.30027e-16	8.01945e-14	down	yes
TraesCS5B02G246400	1.65296	1.862	2.06398	4.35161	4.95405	4.34503	0.408693	-1.29091	8.35829e-16	8.0657e-14	down	yes
TraesCS5D02G222500	1.05992	1.03467	1.42625	4.71124	4.95499	4.71923	0.24475	-2.03062	8.94115e-16	8.57605e-14	down	yes
TraesCS3D02G203400	6.90731	7.44828	8.31645	14.9492	17.6881	14.6699	0.479251	-1.06115	1.07936e-15	1.02416e-13	down	yes
TraesCS5B02G028300	2.13013	1.87988	2.60608	6.09601	6.55914	8.00187	0.320283	-1.64258	1.24743e-15	1.178e-13	down	yes
TraesCS6B02G333800	0.775955	1.35601	0.869366	4.44363	3.9131	5.60664	0.214943	-2.21797	1.34864e-15	1.26905e-13	down	yes
TraesCS2B02G380600	0.885263	0.690003	1.03087	3.00911	3.40035	2.77429	0.283777	-1.81717	1.5238e-15	1.4204e-13	down	yes
TraesCS1B02G309300	9.44002	11.8736	11.3813	23.7275	23.6932	22.5166	0.46749	-1.09699	1.64967e-15	1.53055e-13	down	yes
TraesCS1B02G274600	11.8913	14.3403	13.8103	25.7532	28.9845	26.8489	0.49079	-1.02682	2.03813e-15	1.86267e-13	down	yes
TraesCS2D02G381600	1.29084	0.928018	0.985746	3.24708	3.59017	3.32889	0.315223	-1.66556	2.10198e-15	1.91662e-13	down	yes
TraesCS7B02G423900	12.9479	13.0787	18.3927	35.9827	36.6075	32.8017	0.421468	-1.24651	2.15035e-15	1.95847e-13	down	yes
TraesCS2B02G145700	3.17523	4.08454	3.97174	7.969	9.32627	8.91165	0.428571	-1.22239	4.11663e-15	3.6246e-13	down	yes
TraesCS6D02G344100	7.18895	8.11479	6.28406	17.2162	17.0793	15.2057	0.436107	-1.19725	4.6001e-15	4.01468e-13	down	yes
TraesCS6B02G427200	0.287572	0.556973	0.375318	2.15158	2.64489	2.05637	0.178008	-2.48998	5.59216e-15	4.82743e-13	down	yes
TraesCS5A02G043800	0.71512	1.01379	0.724717	3.45497	3.00599	2.73778	0.266735	-1.90652	5.88458e-15	5.06885e-13	down	yes
TraesCS3B02G412600	2.5477	2.0722	2.48182	4.43576	5.59749	5.16944	0.467136	-1.09809	6.83655e-15	5.82567e-13	down	yes
TraesCS4D02G094700	2.58647	2.03576	2.34714	4.76546	4.95002	4.93839	0.4756	-1.07218	1.00329e-14	8.40508e-13	down	yes
TraesCS6B02G393500	7.65875	9.45326	7.74915	18.2976	19.5316	17.0377	0.453117	-1.14204	1.17245e-14	9.77072e-13	down	yes
TraesCS7A02G478100	6.36723	5.26909	5.69611	11.2014	12.3658	11.7029	0.491418	-1.02498	1.40652e-14	1.15516e-12	down	yes
TraesCS3D02G222200	2.83583	3.10653	3.22238	6.7721	9.91709	6.98569	0.387108	-1.36919	1.6149e-14	1.31408e-12	down	yes
TraesCS5D02G392000	9.17224	8.99965	14.6602	29.095	33.845	26.5417	0.366914	-1.44649	2.01601e-14	1.6189e-12	down	yes
TraesCS4B02G340700	8.7683	9.86136	10.7734	19.898	19.0902	21.0465	0.489767	-1.02983	3.91895e-14	3.0188e-12	down	yes
TraesCS5D02G404500	2.05335	2.18136	2.33279	4.57747	4.48913	4.81998	0.472938	-1.08028	5.03749e-14	3.84685e-12	down	yes
TraesCS1A02G130700	1.24385	1.48973	1.30828	3.06241	3.19242	2.73055	0.449826	-1.15256	5.38967e-14	4.08828e-12	down	yes
TraesCS1A02G164800	5.30508	5.19627	5.1394	10.7833	10.9736	9.99536	0.492587	-1.02155	7.44739e-14	5.54844e-12	down	yes
TraesCS3B02G235100	2.81509	2.74419	3.63489	6.39629	7.1219	6.56914	0.45771	-1.12749	7.59689e-14	5.64923e-12	down	yes
TraesCS7D02G085000	1.12743	0.958869	1.46139	5.1544	3.68131	5.1407	0.253834	-1.97804	8.16149e-14	6.05208e-12	down	yes
TraesCS1B02G308900	2.15247	2.53789	2.47971	6.47556	7.91857	5.39875	0.362255	-1.46492	1.05562e-13	7.71976e-12	down	yes
TraesCS1D02G304600	0.769161	0.572344	0.503424	2.0961	2.11624	1.88554	0.302552	-1.72474	1.15667e-13	8.41221e-12	down	yes
TraesCS5A02G388900	15.6138	13.0767	22.9079	43.3732	39.0691	47.901	0.395866	-1.33692	1.3936e-13	1.00128e-11	down	yes
TraesCS3B02G157800	4.20167	3.81848	5.23433	13.335	11.5348	9.49471	0.385702	-1.37444	1.50333e-13	1.07271e-11	down	yes
TraesCS2D02G459200	2.4339	1.50436	1.87393	8.33372	10.1052	5.81964	0.239593	-2.06134	1.68581e-13	1.19648e-11	down	yes
TraesCS5D02G053200	2.4735	2.53617	2.10484	6.09921	5.27394	6.02736	0.408868	-1.29029	1.70699e-13	1.21042e-11	down	yes
TraesCS5B02G170100	6.38757	4.71084	6.14949	13.6517	12.758	12.6409	0.44168	-1.17893	1.9631e-13	1.38461e-11	down	yes
TraesCS1A02G352100	0.080414	0.280286	0.18192	2.28534	1.60056	2.53126	0.0845578	-3.56392	2.48934e-13	1.7327e-11	down	yes
TraesCS4A02G220100	2.70084	2.18362	2.66693	4.90242	5.00516	5.59543	0.487092	-1.03773	3.01137e-13	2.07784e-11	down	yes
TraesCS5A02G239100	0.315879	0.194963	0.379094	2.65123	2.09488	3.13175	0.112967	-3.14603	3.03912e-13	2.09154e-11	down	yes
TraesCS2B02G480600	1.32306	1.41946	1.19945	5.43187	7.67494	4.04873	0.229779	-2.12168	3.09175e-13	2.12592e-11	down	yes
TraesCS1B02G329300	16.5311	12.5955	19.1339	37.0562	35.5566	33.1869	0.456149	-1.13242	3.47584e-13	2.36951e-11	down	yes
TraesCS1D02G366700	0.712755	0.785109	0.894659	2.52108	3.00699	2.31994	0.304857	-1.71379	6.42438e-13	4.24827e-11	down	yes
TraesCS6A02G360600	5.17176	6.07376	4.59098	11.8099	13.0299	10.8825	0.443323	-1.17357	8.42036e-13	5.51763e-11	down	yes
TraesCS6D02G172400	0.993376	1.31322	1.22206	3.18504	2.95204	3.10484	0.38181	-1.38907	8.98846e-13	5.86569e-11	down	yes
TraesCS2A02G134000	0.377268	0.471435	0.477177	1.63404	1.17578	1.33872	0.319602	-1.64565	9.17554e-13	5.97305e-11	down	yes
TraesCS3B02G127500	1.53004	1.61344	2.02494	4.44288	4.29034	4.70326	0.384656	-1.37836	9.52203e-13	6.1834e-11	down	yes
TraesCS7D02G337600	1.02639	1.10777	1.08618	3.19968	2.84879	2.57177	0.373578	-1.42052	1.33056e-12	8.48771e-11	down	yes
TraesCS7B02G028200	1.55876	1.69444	1.79205	3.48548	4.04029	3.47762	0.458517	-1.12495	1.43035e-12	9.08049e-11	down	yes
TraesCS7D02G373100	0.167337	0.138376	0.074447	1.32429	1.73806	0.752659	0.0996485	-3.32701	1.50866e-12	9.54711e-11	down	yes
TraesCS4A02G073800	1.62078	1.74294	1.38638	3.82993	4.40145	4.02832	0.387457	-1.36789	1.54318e-12	9.71138e-11	down	yes
TraesCS7B02G325800	18.6801	18.9147	13.9179	46.0605	34.4518	53.8556	0.383371	-1.38319	1.69248e-12	1.05968e-10	down	yes
TraesCS1B02G186300	0.239298	0.23267	0.333162	1.75837	1.7457	1.11728	0.17422	-2.52102	1.71063e-12	1.0689e-10	down	yes
TraesCS2A02G384900	0.498936	0.65183	0.959595	2.43586	2.68277	2.66158	0.271247	-1.88232	1.89843e-12	1.1779e-10	down	yes
TraesCS6A02G096100	0.804821	0.738909	0.812659	1.73647	2.01967	1.6665	0.434546	-1.20242	2.14831e-12	1.32261e-10	down	yes
TraesCS6D02G384500	23.684	19.4773	30.5659	51.7174	52.2991	51.4868	0.47412	-1.07668	2.19808e-12	1.34698e-10	down	yes
TraesCS5D02G014100	27.2687	37.4668	22.1748	77.569	67.3209	81.4391	0.384	-1.38082	2.21271e-12	1.35386e-10	down	yes
TraesCS6B02G462700	3.65446	2.94388	4.42612	8.90631	9.22616	8.28628	0.417297	-1.26085	2.28715e-12	1.39726e-10	down	yes
TraesCS4D02G266700	8.4217	7.86911	10.2511	20.8113	27.1764	16.4137	0.412132	-1.27882	2.43694e-12	1.4774e-10	down	yes
TraesCS6B02G410800	2.56959	3.04647	2.5623	5.87008	6.66222	5.6354	0.450159	-1.15149	2.5382e-12	1.53411e-10	down	yes
TraesCS3D02G230600	10.7397	8.43234	12.4491	21.8559	24.0488	20.382	0.477035	-1.06783	3.16536e-12	1.87885e-10	down	yes
TraesCS4D02G250400	3.49234	3.02665	3.15551	6.14246	6.47199	7.1149	0.490361	-1.02808	4.47467e-12	2.60538e-10	down	yes
TraesCS3B02G276700	0.786336	0.738452	0.741206	1.77495	1.88832	2.23989	0.383861	-1.38134	4.52516e-12	2.62707e-10	down	yes
TraesCS2B02G395600	7.55811	8.53841	7.95377	15.5402	20.3193	17.4576	0.45108	-1.14854	4.53758e-12	2.63236e-10	down	yes
TraesCS2B02G300400	1.24694	1.58121	1.72684	4.41331	4.22443	3.93828	0.362197	-1.46515	5.11809e-12	2.95188e-10	down	yes
TraesCS6A02G312100	0.272309	0.191271	0.306192	0.919827	0.753954	0.896576	0.29948	-1.73947	6.95219e-12	3.93539e-10	down	yes
TraesCS6D02G286900	0.51856	0.339645	0.453428	1.9128	1.54138	1.70978	0.253998	-1.97711	7.62536e-12	4.30113e-10	down	yes
TraesCS3D02G244200	0.135968	0.054465	0.141199	0.65435	0.714856	0.546428	0.173119	-2.53017	8.20323e-12	4.59445e-10	down	yes
TraesCS7A02G236500	0.488403	0.787264	0.24594	2.60084	3.17023	2.35298	0.187296	-2.4166	8.71533e-12	4.8403e-10	down	yes
TraesCS4D02G231400	1.2107	1.27704	0.904621	3.60578	3.09758	3.7607	0.324191	-1.62508	1.02414e-11	5.63271e-10	down	yes
TraesCS5A02G225100	1.9399	1.86612	2.0823	4.57206	5.04723	4.4234	0.419316	-1.25389	1.12186e-11	6.14038e-10	down	yes
TraesCS1D02G222600	0.285991	0.175439	0.342433	1.38132	1.23624	1.08093	0.217349	-2.20191	1.12918e-11	6.17192e-10	down	yes
TraesCS7D02G442100	1.97351	2.07793	1.87876	3.93882	5.12961	4.66755	0.431728	-1.21181	1.13785e-11	6.21077e-10	down	yes
TraesCS4B02G298700	1.26806	1.11081	2.08894	4.98109	6.01791	4.093	0.296038	-1.75614	1.19318e-11	6.50385e-10	down	yes
TraesCS2B02G120600	0.688974	0.763467	0.679615	1.7185	1.87045	1.96989	0.383544	-1.38254	1.24898e-11	6.78012e-10	down	yes
TraesCS5D02G408000	6.28108	9.5687	9.19414	22.3914	27.4273	24.9404	0.334995	-1.57779	1.49673e-11	8.06438e-10	down	yes
TraesCS7D02G501700	22.4684	27.4106	30.9871	55.7382	57.307	49.9761	0.496046	-1.01145	1.54905e-11	8.33494e-10	down	yes
TraesCS3A02G314100	8.14441	6.72866	9.25318	16.6023	16.3584	15.2927	0.499992	-1.00002	1.60738e-11	8.63709e-10	down	yes
TraesCS7D02G296800	5.73182	5.13398	5.05285	10.8755	13.0345	10.0875	0.468229	-1.09471	2.41775e-11	1.27078e-09	down	yes
TraesCS3D02G041400	0.255755	0.169057	0.264834	1.54918	1.58121	1.37442	0.153091	-2.70754	2.5485e-11	1.33597e-09	down	yes
TraesCS3A02G476000	0.450882	0.483819	0.567073	1.97642	1.84605	1.23611	0.296876	-1.75207	2.60891e-11	1.36403e-09	down	yes
TraesCS1B02G377100	9.52462	10.9102	8.29119	19.8934	21.5709	18.3818	0.479998	-1.0589	2.89511e-11	1.50181e-09	down	yes
TraesCS3A02G246000	1.79689	1.54085	1.94951	3.67526	4.34515	3.60705	0.454721	-1.13695	3.06633e-11	1.58648e-09	down	yes
TraesCS5B02G393400	0.547636	0.802174	0.559064	1.864	2.1502	1.74097	0.33168	-1.59214	3.36882e-11	1.72729e-09	down	yes
TraesCS6B02G179000	3.56728	2.54071	3.83852	8.34692	7.56668	7.38226	0.426965	-1.22781	3.42847e-11	1.75668e-09	down	yes
TraesCS2A02G108100	1.23795	2.10657	0.854662	6.63375	5.18047	6.35278	0.231143	-2.11314	3.45872e-11	1.7699e-09	down	yes
TraesCS5A02G395200	1.56768	1.48586	1.49216	3.19484	2.89805	3.54415	0.47169	-1.08409	3.78767e-11	1.92829e-09	down	yes
TraesCS5A02G196400	0.770284	1.03842	1.12778	4.45021	6.10365	3.19586	0.213567	-2.22724	3.79498e-11	1.93077e-09	down	yes
TraesCS7A02G477100	0.044963	0	0	0.972024	0.719168	0.629414	0.0193755	-5.68962	3.92811e-11	1.99212e-09	down	yes
TraesCS1A02G279000	2.12325	1.59202	2.70273	5.23394	5.06588	5.40489	0.408667	-1.291	4.17484e-11	2.10783e-09	down	yes
TraesCS1A02G013800	0.940595	0.72382	0.782885	1.91337	2.09905	1.7642	0.423656	-1.23904	4.88082e-11	2.44562e-09	down	yes
TraesCS5D02G129800	2.01315	1.76078	1.88537	3.85841	3.77075	3.81499	0.494515	-1.01592	5.80769e-11	2.8613e-09	down	yes
TraesCS7B02G167500	0.868647	0.785287	0.631128	2.38464	2.47857	2.36091	0.31631	-1.66059	5.90533e-11	2.9076e-09	down	yes
TraesCS7B02G134600	0.875279	1.6641	0.717889	7.35394	10.5337	7.27336	0.129457	-2.94946	6.33909e-11	3.10385e-09	down	yes
TraesCS2B02G579000	5.05829	5.08148	3.88965	9.21535	10.9481	11.2166	0.44708	-1.16139	9.21854e-11	4.39188e-09	down	yes
TraesCS1D02G168700	0.685441	0.889702	0.864215	2.8147	3.19195	2.10626	0.300676	-1.73372	1.26414e-10	5.9022e-09	down	yes
TraesCS6B02G214100	0.514862	0.253971	0.328786	1.14525	1.36803	1.18452	0.296831	-1.75229	1.26728e-10	5.91338e-09	down	yes
TraesCS3A02G362000	0	0	0	4.34403	0	0	6.90604e-05	-13.8218	1.64781e-10	7.53845e-09	down	yes
TraesCS3B02G258600	1.22589	1.4249	1.09321	2.77862	2.91545	2.93012	0.434128	-1.20381	2.17206e-10	9.82362e-09	down	yes
TraesCS3A02G208600	2.20544	2.22823	3.31828	6.10482	6.08239	5.38637	0.441114	-1.18078	2.44219e-10	1.09518e-08	down	yes
TraesCS1D02G126600	2.87722	2.84766	2.51911	5.75217	6.00968	4.99392	0.492009	-1.02324	2.76527e-10	1.22553e-08	down	yes
TraesCS2A02G502100	1.92574	2.50601	2.40806	6.3995	6.10848	4.86979	0.393595	-1.34522	2.8472e-10	1.26044e-08	down	yes
TraesCS2A02G305000	1.07008	1.00752	1.24099	2.37511	2.20956	2.15152	0.49265	-1.02136	3.13569e-10	1.38045e-08	down	yes
TraesCS5D02G538500	0.762252	0.281065	0.301095	2.943	1.85832	4.53576	0.143986	-2.796	3.38286e-10	1.48515e-08	down	yes
TraesCS5A02G382600	15.0833	17.8558	27.1992	45.0055	48.3194	45.6041	0.432871	-1.20799	3.70477e-10	1.61487e-08	down	yes
TraesCS2A02G343500	3.69927	2.76113	4.35191	8.38669	7.77377	8.55157	0.437532	-1.19254	3.99141e-10	1.73126e-08	down	yes
TraesCS1D02G370700	1.55938	0.764673	1.32877	4.21628	3.58926	3.60406	0.320153	-1.64317	4.10377e-10	1.77708e-08	down	yes
TraesCS3D02G124400	1.75467	2.38907	2.2434	4.29976	4.34337	5.01066	0.467792	-1.09606	4.31014e-10	1.86137e-08	down	yes
TraesCS2D02G525300	2.88713	2.308	2.94681	6.5103	6.244	4.77448	0.464489	-1.10628	4.3788e-10	1.89e-08	down	yes
TraesCS1D02G278300	3.51498	2.83239	4.04785	6.56266	7.28782	7.10832	0.495983	-1.01164	5.19373e-10	2.22362e-08	down	yes
TraesCS7A02G301400	6.78952	5.89537	5.42922	11.6699	13.3648	11.5469	0.49517	-1.014	5.27836e-10	2.25742e-08	down	yes
TraesCS7B02G317000	1.43763	1.31493	1.49548	2.63161	2.8533	3.08851	0.495488	-1.01308	5.32491e-10	2.27243e-08	down	yes
TraesCS1A02G365200	0.431528	0.29216	0.478489	1.50677	1.50594	1.53937	0.264094	-1.92088	5.53122e-10	2.35541e-08	down	yes
TraesCS3B02G137500	0.930442	0.775064	0.808359	2.05877	2.25416	2.10234	0.391856	-1.35161	5.64221e-10	2.40139e-08	down	yes
TraesCS1D02G131600	0.769836	0.866322	0.872887	1.76071	1.93889	2.01029	0.439421	-1.18632	5.6937e-10	2.41941e-08	down	yes
TraesCS3A02G235700	0.331508	0.547041	0.817129	2.47157	2.68988	2.12049	0.232861	-2.10246	6.30663e-10	2.66135e-08	down	yes
TraesCS7A02G452800	1.7685	1.99437	1.87213	4.17981	3.98036	3.8275	0.470066	-1.08907	6.71372e-10	2.82414e-08	down	yes
TraesCS2A02G458600	0.664685	0.822036	0.92451	3.0514	3.54355	2.5883	0.262568	-1.92924	6.73018e-10	2.82956e-08	down	yes
TraesCS5D02G398900	2.80915	1.61583	2.13455	5.12655	4.94535	6.36491	0.399076	-1.32527	7.99581e-10	3.32297e-08	down	yes
TraesCS3A02G122500	2.69581	3.67084	3.2273	6.04461	6.53498	7.01092	0.489725	-1.02996	8.06719e-10	3.35088e-08	down	yes
TraesCS3A02G363400	3.73314	2.9123	4.45058	9.19847	7.70534	7.84814	0.448289	-1.1575	9.00365e-10	3.7146e-08	down	yes
TraesCS7B02G352800	1.20033	1.36602	1.00737	2.94615	3.01154	2.80466	0.407849	-1.29389	9.36704e-10	3.85651e-08	down	yes
TraesCS3D02G276000	4.34676	6.13346	3.52788	11.5518	11.3866	11.2905	0.409247	-1.28895	1.28386e-09	5.1315e-08	down	yes
TraesCS4A02G287500	0.055033	0.034054	0.081684	0.752404	0.659962	0.597365	0.0849721	-3.55687	1.28697e-09	5.14133e-08	down	yes
TraesCS7B02G197000	1.37593	0.982944	1.26715	3.2917	2.77315	3.16625	0.392806	-1.34811	1.46222e-09	5.79772e-08	down	yes
TraesCS5D02G420300	1.9484	2.212	1.7134	3.72596	4.73813	4.93608	0.438339	-1.18988	1.49347e-09	5.91571e-08	down	yes
TraesCS6A02G373400	2.00971	2.21121	1.81789	4.85559	5.54972	4.45307	0.406424	-1.29894	1.82885e-09	7.13279e-08	down	yes
TraesCS2A02G548100	4.82759	4.1989	4.26936	8.12658	10.4544	8.31234	0.494393	-1.01627	2.04396e-09	7.8954e-08	down	yes
TraesCS3B02G045500	0.346905	0.243588	0.85866	2.6537	2.39907	2.29602	0.197196	-2.3423	2.18997e-09	8.41844e-08	down	yes
TraesCS7B02G335600	4.94436	4.1157	6.35412	14.6054	10.8473	10.7487	0.42579	-1.23179	2.61939e-09	9.94406e-08	down	yes
TraesCS6D02G222300	0.962607	1.05892	0.862743	2.15178	2.748	2.73998	0.377533	-1.40533	3.5419e-09	1.31078e-07	down	yes
TraesCS5B02G275600	0.113531	0.186446	0.101954	1.00113	0.9759	0.675163	0.151546	-2.72217	3.95681e-09	1.45619e-07	down	yes
TraesCS6B02G411100	1.97146	1.89475	1.78648	4.88738	4.85521	3.86877	0.415292	-1.2678	4.48803e-09	1.63352e-07	down	yes
TraesCSU02G235600	0.18287	0.410637	0.392588	1.58908	1.43643	1.56123	0.214988	-2.21767	4.54358e-09	1.65223e-07	down	yes
TraesCS5D02G182600	1.71806	1.94069	2.00122	4.5174	3.72744	4.29537	0.451345	-1.1477	5.02628e-09	1.81785e-07	down	yes
TraesCS7D02G407800	2.08608	1.75481	2.13251	4.05023	4.72453	3.58812	0.483172	-1.04939	5.1116e-09	1.84694e-07	down	yes
TraesCS5A02G458700	1.99314	2.79914	2.30621	5.69536	5.89254	5.06063	0.426373	-1.22981	5.54162e-09	1.99069e-07	down	yes
TraesCS3B02G136600	0.463107	0.554139	0.564615	1.30509	1.22161	1.2602	0.417719	-1.25939	5.66605e-09	2.03248e-07	down	yes
TraesCS3A02G386300	1.45297	1.79906	1.22564	3.13067	3.56175	4.04367	0.417067	-1.26165	6.26766e-09	2.23216e-07	down	yes
TraesCS2D02G459100	0	0	0	1.15156	1.10208	0.501916	0.000108871	-13.1651	6.6649e-09	2.35463e-07	down	yes
TraesCS6D02G357100	1.12456	1.50139	1.64803	2.99849	3.32521	3.3089	0.4437	-1.17234	8.11949e-09	2.82206e-07	down	yes
TraesCS6A02G400300	40.7921	29.6588	52.1784	78.2565	87.8262	82.4645	0.493384	-1.01922	8.43123e-09	2.91765e-07	down	yes
TraesCS6D02G357600	1.03611	1.41024	0.747356	3.38029	3.85953	3.25204	0.304398	-1.71597	9.22761e-09	3.16976e-07	down	yes
TraesCS5A02G327900	4.0051	4.66541	3.48456	8.54056	10.9692	7.48999	0.450192	-1.15139	9.40333e-09	3.22593e-07	down	yes
TraesCS2A02G255100	1.62356	1.61879	1.72975	3.32089	3.62945	3.05218	0.497085	-1.00844	9.98001e-09	3.40904e-07	down	yes
TraesCS5D02G484500	0.433007	0.354733	0.694479	1.80878	1.93323	1.50566	0.282452	-1.82392	1.01394e-08	3.46052e-07	down	yes
TraesCS4A02G441800	0	0	0	0.461786	0.619611	0.804835	0.000159047	-12.6183	1.04379e-08	3.54945e-07	down	yes
TraesCS6B02G342300	0.162354	0.115662	0.188176	0.446264	0.500124	0.521775	0.317534	-1.65502	1.09027e-08	3.69614e-07	down	yes
TraesCS6B02G217200	8.31795	9.70063	11.8709	19.2253	30.3527	18.6351	0.438178	-1.19041	1.09718e-08	3.71528e-07	down	yes
TraesCS1B02G371000	0.881207	1.39656	1.43453	4.93979	4.56856	5.35904	0.249694	-2.00177	1.10484e-08	3.73769e-07	down	yes
TraesCS3B02G492900	5.84339	4.88385	6.81783	15.1641	15.5878	9.94348	0.431132	-1.2138	1.15209e-08	3.88362e-07	down	yes
TraesCS2A02G333500	2.96225	3.44523	3.98419	8.34152	7.5354	7.18768	0.450546	-1.15025	1.21878e-08	4.09624e-07	down	yes
TraesCS3A02G152300	0.420472	0.39579	0.334829	1.36492	1.34629	1.46034	0.275938	-1.85758	1.35886e-08	4.5287e-07	down	yes
TraesCS7D02G026000	0.923411	0.839236	1.0184	2.43418	2.67907	1.99077	0.391475	-1.35301	1.36932e-08	4.56166e-07	down	yes
TraesCS2D02G386700	6.27883	4.24219	7.46099	12.6924	12.3547	12.2646	0.48194	-1.05308	1.40179e-08	4.65617e-07	down	yes
TraesCS1D02G270300	1.03144	1.32127	1.04267	3.34695	4.40536	3.76184	0.294888	-1.76176	1.4776e-08	4.89365e-07	down	yes
TraesCS4D02G105600	3.06698	3.00633	2.4219	5.91591	6.57867	6.15374	0.455548	-1.13432	1.50835e-08	4.98302e-07	down	yes
TraesCS4A02G186500	1.60275	1.28513	1.45872	2.74951	3.24565	2.85032	0.491393	-1.02505	1.68237e-08	5.4894e-07	down	yes
TraesCS2A02G574700	3.78828	3.95844	3.90546	10.5703	7.12048	7.34616	0.4654	-1.10346	1.83968e-08	5.9635e-07	down	yes
TraesCS7D02G342700	1.29356	1.05143	1.00425	2.44989	3.50823	2.85928	0.379845	-1.39652	1.91527e-08	6.17576e-07	down	yes
TraesCS5B02G429700	0.474484	0.600073	0.44659	1.16636	1.36638	1.19298	0.408282	-1.29236	2.01245e-08	6.44982e-07	down	yes
TraesCS4A02G266900	0.677491	0.94627	1.00511	3.04281	2.45327	2.37867	0.333835	-1.58279	2.01567e-08	6.45753e-07	down	yes
TraesCS4B02G019800	1.66603	1.11178	1.81409	4.49948	4.76657	3.6022	0.35684	-1.48665	2.01987e-08	6.46838e-07	down	yes
TraesCS6A02G344000	0.309627	0.262955	0.287129	0.774088	0.835853	0.72094	0.368835	-1.43895	2.17056e-08	6.91988e-07	down	yes
TraesCS7D02G332100	0.068026	0.035271	0	1.02711	2.22894	0.32885	0.0288145	-5.11706	2.37598e-08	7.49992e-07	down	yes
TraesCS4B02G232800	0.020443	0	0	0.898289	0.3099	0.471117	0.0121735	-6.36011	2.46582e-08	7.75575e-07	down	yes
TraesCS7A02G075600	0.151343	0.124878	0.283306	0.977428	1.16443	0.802543	0.190031	-2.39569	3.15136e-08	9.70446e-07	down	yes
TraesCS5B02G238100	1.01087	0.582182	0.71281	2.61797	2.73864	2.23804	0.303617	-1.71968	3.17873e-08	9.77736e-07	down	yes
TraesCS6A02G185100	1.57041	1.01761	1.20536	4.50987	3.13464	2.95149	0.358001	-1.48196	3.47825e-08	1.06001e-06	down	yes
TraesCS2A02G159300	1.32583	0.843733	1.45689	2.8109	3.33939	2.79209	0.405536	-1.3021	3.56707e-08	1.085e-06	down	yes
TraesCS2A02G109600	0.578598	0.800562	0.737464	1.76987	1.90242	1.85061	0.383244	-1.38366	3.65902e-08	1.11079e-06	down	yes
TraesCS2B02G544100	0.131746	0.269298	0.134251	0.647557	1.18265	1.09817	0.182796	-2.45169	3.69999e-08	1.12158e-06	down	yes
TraesCS3A02G258000	2.4589	2.81002	2.99737	4.92274	7.14082	4.8603	0.48844	-1.03375	4.15099e-08	1.24969e-06	down	yes
TraesCS3A02G021800	0.124057	0.12968	0.098616	0.630033	0.712284	0.447722	0.196841	-2.3449	4.28938e-08	1.28745e-06	down	yes
TraesCS2B02G223400	5.13438	4.33879	5.8158	10.6588	11.1166	9.03028	0.496305	-1.0107	4.29374e-08	1.28827e-06	down	yes
TraesCS6A02G147300	2.14078	1.7708	2.23649	4.07073	4.67193	3.86895	0.487493	-1.03655	4.7749e-08	1.42082e-06	down	yes
TraesCS3D02G285100	0.739325	0.923764	0.996264	1.75736	2.12819	1.857	0.463096	-1.11062	5.41484e-08	1.5957e-06	down	yes
TraesCS2B02G098400	0.22768	0.126686	0.297271	1.47659	0.751438	1.30232	0.184581	-2.43767	5.61972e-08	1.65178e-06	down	yes
TraesCS4B02G298800	1.13525	1.00722	2.21457	4.39842	5.23573	3.70618	0.326607	-1.61437	5.77684e-08	1.69108e-06	down	yes
TraesCS2D02G328200	2.47144	3.20434	2.24515	6.2056	6.24909	6.76607	0.412103	-1.27892	6.11767e-08	1.77692e-06	down	yes
TraesCS5D02G188600	0.121127	0.178373	0.190892	0.750977	1.11816	0.645673	0.195002	-2.35844	6.93883e-08	1.9981e-06	down	yes
TraesCS5B02G013800	1.36026	1.26402	2.25867	5.24425	4.97497	4.7995	0.325124	-1.62094	6.96768e-08	2.00495e-06	down	yes
TraesCS6D02G155500	0.661312	0.561871	0.861612	1.79844	1.91602	2.05837	0.361139	-1.46937	7.02353e-08	2.0181e-06	down	yes
TraesCS3B02G220700	0.485418	0.589409	1.08874	2.62842	3.03913	2.96068	0.250754	-1.99565	7.04471e-08	2.02288e-06	down	yes
TraesCS7B02G069300	0.763459	0.550387	0.832243	1.74455	2.16885	1.93486	0.366961	-1.4463	7.35849e-08	2.10596e-06	down	yes
TraesCS5B02G484400	0.187899	0.195159	0.240227	0.609544	0.647748	0.611745	0.333479	-1.58433	7.69222e-08	2.19751e-06	down	yes
TraesCS3B02G290700	2.00411	2.45114	1.52062	4.46268	6.56992	3.97592	0.398165	-1.32856	8.13062e-08	2.31194e-06	down	yes
TraesCS5D02G316400	1.08379	1.22017	1.58156	3.0722	3.32516	3.68518	0.385371	-1.37568	8.26684e-08	2.349e-06	down	yes
TraesCS3D02G327600	1.73338	2.27897	2.53691	4.90377	4.93649	4.20086	0.466434	-1.10025	9.4659e-08	2.6555e-06	down	yes
TraesCS4D02G088200	0.504158	0.562512	0.437509	1.14729	1.17196	1.31101	0.414346	-1.27109	9.71668e-08	2.72009e-06	down	yes
TraesCS1B02G199600	1.35298	1.01585	0.938048	3.42513	2.35176	2.85613	0.38305	-1.3844	9.77842e-08	2.73448e-06	down	yes
TraesCS2D02G189900	1.40272	1.94547	1.82527	3.46994	3.46647	3.4733	0.496985	-1.00873	9.81551e-08	2.74196e-06	down	yes
TraesCS2B02G346800	3.443	3.03412	3.11583	6.14019	6.8824	6.18074	0.499546	-1.00131	1.04971e-07	2.92002e-06	down	yes
TraesCS3A02G154600	0.539718	0.743493	0.538373	2.47235	1.8335	2.20334	0.279848	-1.83728	1.08759e-07	3.01485e-06	down	yes
TraesCS5A02G411500	1.31193	1.01638	1.43196	3.06671	3.37913	2.28175	0.43085	-1.21474	1.10474e-07	3.05067e-06	down	yes
TraesCS4D02G234000	0.2079	0.438762	0.553962	1.71974	1.90504	1.52436	0.23317	-2.10055	1.20125e-07	3.29087e-06	down	yes
TraesCS5A02G248700	3.95216	3.49292	6.08352	8.4391	9.7202	9.66761	0.48617	-1.04047	1.23027e-07	3.36341e-06	down	yes
TraesCS2A02G283300	2.29697	2.17884	1.51694	4.87884	5.04629	3.89676	0.43357	-1.20566	1.26993e-07	3.46582e-06	down	yes
TraesCS5B02G237700	0.854564	0.918811	0.832208	2.88193	3.4357	2.50754	0.295244	-1.76002	1.29068e-07	3.51253e-06	down	yes
TraesCS5B02G183800	0.625017	0.484101	0.648269	1.82966	2.85409	1.56064	0.281435	-1.82913	1.41657e-07	3.82403e-06	down	yes
TraesCS1D02G431700	1.96867	2.51798	1.82531	3.86525	4.37634	5.08623	0.473592	-1.07828	1.42156e-07	3.83487e-06	down	yes
TraesCS4A02G139600	79.9392	54.6123	112.811	160.611	187.697	168.494	0.478641	-1.06298	1.44846e-07	3.8995e-06	down	yes
TraesCS2A02G239200	1.23363	0.992277	0.805071	2.0687	2.36916	2.2855	0.450813	-1.1494	1.66519e-07	4.43189e-06	down	yes
TraesCS5A02G212300	1.44479	1.10721	1.51894	2.68345	3.2973	3.33767	0.43687	-1.19472	1.70545e-07	4.52539e-06	down	yes
TraesCS6D02G204800	0.774947	0.763422	1.06769	2.25231	2.46993	2.18244	0.377433	-1.40571	1.71695e-07	4.54983e-06	down	yes
TraesCS4A02G094300	0.376471	0.237419	0.696592	1.56451	2.06711	1.60474	0.250266	-1.99847	1.72416e-07	4.5659e-06	down	yes
TraesCS6A02G150900	1.73649	1.60463	1.55808	3.48785	3.15372	4.03555	0.45885	-1.12391	1.87247e-07	4.91279e-06	down	yes
TraesCS2A02G362100	0.489115	0.470854	0.509984	1.04657	1.13104	1.0745	0.452	-1.14561	1.98161e-07	5.1684e-06	down	yes
TraesCS7B02G265200	0.690087	0.614334	0.768395	1.77953	1.65651	1.56327	0.414621	-1.27014	2.04046e-07	5.30445e-06	down	yes
TraesCS1D02G331700	0.826943	0.718241	0.434928	1.81817	1.82664	1.75737	0.36654	-1.44796	2.04945e-07	5.3261e-06	down	yes
TraesCS7A02G363600	1.25711	1.12572	0.770907	2.49697	2.21672	2.88973	0.41478	-1.26958	2.06105e-07	5.35099e-06	down	yes
TraesCS4D02G210900	0.612023	0.309543	0.846637	1.82859	2.57255	1.94636	0.278567	-1.8439	2.25954e-07	5.80746e-06	down	yes
TraesCS5B02G360600	0.05875	0.057138	0.069145	0.399454	0.256591	0.443414	0.168295	-2.57094	2.45436e-07	6.26963e-06	down	yes
TraesCS3B02G123600	1.52206	1.59614	1.98936	3.63021	3.62613	3.0453	0.495801	-1.01217	2.47425e-07	6.31637e-06	down	yes
TraesCS6A02G307700	0.541001	0.338148	0.854618	1.9146	1.94269	1.7048	0.311711	-1.68172	2.68495e-07	6.78017e-06	down	yes
TraesCSU02G124700	1.16711	1.56944	1.31252	3.67134	2.66262	3.5947	0.407817	-1.294	2.69244e-07	6.79474e-06	down	yes
TraesCS6D02G300900	0.757451	0.776686	0.902155	1.78141	1.62302	1.69809	0.477468	-1.06652	2.72624e-07	6.87351e-06	down	yes
TraesCS4D02G055000	0.161129	0.166823	0.186012	0.675397	0.688862	0.447092	0.283746	-1.81733	2.75118e-07	6.92977e-06	down	yes
TraesCS2A02G123800	1.1771	1.80966	1.13635	2.90138	3.25789	3.40356	0.43116	-1.21371	2.85936e-07	7.16816e-06	down	yes
TraesCS2B02G143800	1.07673	1.14105	1.80547	4.58408	4.09879	4.03945	0.316235	-1.66093	2.89732e-07	7.25875e-06	down	yes
TraesCS7D02G369700	1.10561	0.978729	0.870159	2.43866	2.83999	2.24066	0.392921	-1.34769	2.90462e-07	7.27475e-06	down	yes
TraesCS3B02G529700	0.052205	0.0982	0	0.722942	0.716431	0.666052	0.0714369	-3.80719	3.38546e-07	8.33706e-06	down	yes
TraesCS3A02G122600	3.03659	4.20801	2.52585	7.89374	6.70965	8.00445	0.432171	-1.21033	3.38818e-07	8.34117e-06	down	yes
TraesCS6B02G336300	1.05103	1.22175	2.0174	3.50606	3.89103	3.46395	0.395006	-1.34005	3.57638e-07	8.74754e-06	down	yes
TraesCS3D02G194300	0.21459	0.342855	0.154822	1.37359	0.756226	1.29844	0.207763	-2.26699	3.67099e-07	8.94863e-06	down	yes
TraesCS5A02G472000	0.842891	0.732223	0.976031	1.98079	2.27378	1.80367	0.421104	-1.24775	3.6835e-07	8.97361e-06	down	yes
TraesCS1A02G329600	0.819309	0.839043	0.661624	1.64068	1.57973	1.91613	0.451661	-1.14669	4.1952e-07	1.0078e-05	down	yes
TraesCS7B02G134000	0.505033	0.708989	0.635381	1.6412	2.14663	1.71212	0.336258	-1.57236	4.20649e-07	1.0096e-05	down	yes
TraesCS2A02G458800	0.629825	0.596623	0.608271	2.86924	3.192	1.66516	0.237461	-2.07424	4.22666e-07	1.01352e-05	down	yes
TraesCS2B02G473200	0.461723	0.595506	0.582881	1.04051	1.58719	1.31203	0.4163	-1.2643	4.33374e-07	1.03794e-05	down	yes
TraesCS5B02G542200	0.188299	0	0.083198	1.10421	0.811817	1.58145	0.0776265	-3.68731	4.39099e-07	1.04912e-05	down	yes
TraesCS5B02G007000	36.9974	59.5514	33.3696	152.01	130.503	154.887	0.297024	-1.75135	4.40378e-07	1.05155e-05	down	yes
TraesCS7A02G549100	1.81832	2.36667	1.74754	3.96943	3.82297	4.31547	0.489974	-1.02922	4.74813e-07	1.12763e-05	down	yes
TraesCS3A02G118400	1.01925	0.79193	1.40381	2.34006	2.47508	2.90309	0.416544	-1.26346	5.69649e-07	1.32633e-05	down	yes
TraesCS2B02G241200	1.6308	1.50203	0.751696	3.30284	3.41232	3.90045	0.365927	-1.45037	5.96022e-07	1.38165e-05	down	yes
TraesCS7A02G421700	0.091494	0.151123	0.106221	0.592515	0.377621	0.512778	0.235238	-2.08781	6.1812e-07	1.42871e-05	down	yes
TraesCS2D02G282000	1.77935	2.73897	3.27748	5.38632	6.25042	6.3619	0.433132	-1.20712	6.28044e-07	1.44576e-05	down	yes
TraesCS7D02G456100	0.036349	0.036687	0.040204	0.532391	0.501433	0.58382	0.070003	-3.83644	7.36483e-07	1.6664e-05	down	yes
TraesCS2B02G078600	0.536651	0.241997	0.621759	1.84881	1.54876	1.7479	0.272163	-1.87746	7.36739e-07	1.66651e-05	down	yes
TraesCS3A02G512400	0	0	0	0.107939	0.302469	0.185706	0.000503259	-10.9564	7.5104e-07	1.69644e-05	down	yes
TraesCS4A02G285200	0.035557	0.081343	0.071234	0.675328	0.502006	0.44817	0.115739	-3.11105	7.68004e-07	1.73082e-05	down	yes
TraesCS5B02G212500	0.473365	0.499891	0.381712	1.57944	1.59023	1.67533	0.279663	-1.83824	7.81822e-07	1.75847e-05	down	yes
TraesCS4A02G315900	1.03801	1.3745	1.66014	2.61839	3.08036	3.02826	0.466672	-1.09952	8.11803e-07	1.81484e-05	down	yes
TraesCS1B02G166100	22.8141	16.2007	32.6369	45.5319	50.7363	49.512	0.491504	-1.02472	8.33259e-07	1.85733e-05	down	yes
TraesCS1B02G149700	1.35819	1.37823	2.21293	3.22141	3.5011	3.5131	0.483543	-1.04829	8.85051e-07	1.96012e-05	down	yes
TraesCS3D02G235400	0.430963	0.559242	0.418251	1.34862	1.44222	1.37052	0.33846	-1.56294	9.12306e-07	2.0143e-05	down	yes
TraesCS6A02G110400	0.732329	1.07201	1.10423	2.74198	2.25102	2.6636	0.379878	-1.39639	9.52298e-07	2.09445e-05	down	yes
TraesCS6A02G167000	1.41716	1.36392	1.63912	2.94482	3.25987	2.8467	0.488344	-1.03403	1.00006e-06	2.1898e-05	down	yes
TraesCS5A02G185600	1.33175	1.67972	2.32189	4.31324	6.50778	3.523	0.371818	-1.42733	1.05568e-06	2.29953e-05	down	yes
TraesCS5D02G232400	0.555438	0.897014	0.652682	2.04086	3.2285	1.95373	0.291445	-1.7787	1.09181e-06	2.36849e-05	down	yes
TraesCS7A02G084800	0	0	0	0.321747	0.090833	0.249661	0.000453007	-11.1082	1.19792e-06	2.58106e-05	down	yes
TraesCS2D02G097800	0.776274	0.916629	0.845809	1.80122	1.69907	2.10436	0.452966	-1.14253	1.21132e-06	2.6078e-05	down	yes
TraesCS5A02G276300	1.27052	0.613573	1.27795	2.99079	2.54422	2.92102	0.373939	-1.41912	1.23295e-06	2.65077e-05	down	yes
TraesCS3D02G035900	0.333148	0.092871	0.140738	1.23739	0.640503	2.43764	0.13133	-2.92873	1.25454e-06	2.69282e-05	down	yes
TraesCS3D02G516900	0.627511	0.210044	0.731625	2.62275	1.71553	2.38142	0.233519	-2.09839	1.26164e-06	2.7066e-05	down	yes
TraesCS1D02G370800	0.400991	0.486676	0.380731	1.19088	1.70988	1.18103	0.310746	-1.68619	1.26411e-06	2.71117e-05	down	yes
TraesCS5B02G476900	2.04514	1.51338	2.26103	4.09133	3.96454	4.17433	0.475834	-1.07147	1.29605e-06	2.76623e-05	down	yes
TraesCS1A02G423100	0.924443	1.43389	0.840956	2.22395	2.79854	2.6954	0.414529	-1.27046	1.29751e-06	2.76859e-05	down	yes
TraesCS1D02G040000	0.957358	0.861691	1.11493	2.26683	3.20054	2.30433	0.377521	-1.40537	1.36037e-06	2.88566e-05	down	yes
TraesCS6D02G282100	5.2116	4.44791	4.56364	8.09225	11.5403	9.27278	0.49206	-1.0231	1.41364e-06	2.98432e-05	down	yes
TraesCSU02G029400	0.278585	0.370368	0.335265	1.28067	0.670279	1.38334	0.295181	-1.76033	1.4652e-06	3.08006e-05	down	yes
TraesCS2A02G226500	0.639007	0.59062	0.649562	1.13645	1.56818	1.25627	0.474434	-1.07572	1.50696e-06	3.15615e-05	down	yes
TraesCSU02G036600	0.043582	0.150327	0.062273	0.817787	0.249698	1.00774	0.123448	-3.01802	1.51792e-06	3.17575e-05	down	yes
TraesCS3A02G134500	0	0.017544	0.018872	0.277469	0.342554	0.168585	0.0461776	-4.43666	1.52932e-06	3.19624e-05	down	yes
TraesCS7A02G246300	0	0	0	0.098261	0.157118	0.226784	0.000622196	-10.6503	1.57182e-06	3.2773e-05	down	yes
TraesCS4B02G034500	0.857119	1.08031	1.08153	2.37425	3.00181	1.93719	0.412807	-1.27646	1.64197e-06	3.4048e-05	down	yes
TraesCS2D02G074000	1.37238	1.37009	1.27137	3.20769	2.52307	3.26111	0.446385	-1.16364	1.69805e-06	3.50643e-05	down	yes
TraesCS7B02G284400	1.16684	0.69321	0.941257	2.57565	2.40152	2.17227	0.391822	-1.35173	1.75554e-06	3.6092e-05	down	yes
TraesCS4A02G127900	0	0.041694	0	0.637226	0.432543	0.287011	0.0307301	-5.0242	1.8018e-06	3.69378e-05	down	yes
TraesCS5D02G246200	0.999459	1.7441	1.3291	3.45523	5.03342	3.85099	0.330046	-1.59926	1.81092e-06	3.71056e-05	down	yes
TraesCS5D02G433100	0.910237	0.573295	0.580276	1.93118	1.76228	1.7536	0.378885	-1.40017	1.85445e-06	3.78498e-05	down	yes
TraesCS2A02G331800	0.95277	0.264686	0.616765	2.11963	2.91079	1.68138	0.273283	-1.87153	2.05086e-06	4.14024e-05	down	yes
TraesCS5A02G200900	1.3413	1.34711	1.43163	3.15573	2.61341	2.54651	0.495456	-1.01317	2.10636e-06	4.234e-05	down	yes
TraesCS2B02G341200	2.38412	1.82275	2.50403	4.48531	3.97995	4.95851	0.499927	-1.00021	2.29342e-06	4.5638e-05	down	yes
TraesCS5B02G284400	0.06851	0.056256	0.088823	0.26379	0.493891	0.282041	0.205429	-2.28329	2.32657e-06	4.62281e-05	down	yes
TraesCS3D02G089800	0.338999	0.723572	1.02421	2.91004	3.56536	1.98187	0.246744	-2.01891	2.35911e-06	4.68162e-05	down	yes
TraesCS7A02G256600	1.03082	1.18262	0.629633	3.36291	2.30497	2.51699	0.347357	-1.52551	2.37693e-06	4.70873e-05	down	yes
TraesCS3D02G120300	1.04637	0.692997	0.964221	2.07981	2.06832	1.84055	0.451449	-1.14736	2.39322e-06	4.73393e-05	down	yes
TraesCSU02G135100	1.16553	1.21627	1.94321	3.76674	3.22662	3.12821	0.427305	-1.22666	2.65455e-06	5.18499e-05	down	yes
TraesCS4B02G167100	0.31832	0.463552	0.333453	1.14861	1.13342	1.01676	0.338101	-1.56447	2.68462e-06	5.23986e-05	down	yes
TraesCS1D02G086400	1.03957	1.12639	1.63744	2.75694	2.60724	2.45564	0.486381	-1.03984	2.96227e-06	5.73667e-05	down	yes
TraesCS3A02G288300	0.080879	0.080383	0.070616	0.979109	1.3012	0.935129	0.0721139	-3.79358	2.98094e-06	5.76703e-05	down	yes
TraesCS3D02G285900	0.601189	0.392033	0.57601	1.47306	2.30133	1.2652	0.311381	-1.68325	3.02555e-06	5.84495e-05	down	yes
TraesCS6B02G422900	1.71004	1.67059	1.1045	3.75905	3.43928	3.2686	0.428505	-1.22261	3.04533e-06	5.88031e-05	down	yes
TraesCS7B02G061600	0.283814	0.206518	0.216021	1.28426	0.74407	0.733258	0.255778	-1.96704	3.11696e-06	6.00694e-05	down	yes
TraesCS1B02G181800	1.65536	1.36828	1.73924	2.68149	3.69494	3.3729	0.488534	-1.03347	3.15262e-06	6.06243e-05	down	yes
TraesCS1D02G125800	1.88189	1.33351	2.54955	4.38565	4.49201	4.76619	0.422531	-1.24287	3.20819e-06	6.15331e-05	down	yes
TraesCS7A02G200500	0	0	0	0.159791	0.14515	0.167176	0.000635436	-10.62	3.25461e-06	6.2359e-05	down	yes
TraesCS2D02G337000	0.538648	0.576478	0.635893	1.23009	1.81719	1.45037	0.389318	-1.36098	3.30547e-06	6.31961e-05	down	yes
TraesCS1B02G242000	1.51697	2.32175	2.52995	4.42682	4.9612	4.25439	0.466829	-1.09903	3.37082e-06	6.42754e-05	down	yes
TraesCS4B02G298400	0	0	0	0.124415	0.09867	0.125518	0.000860578	-10.1824	3.39018e-06	6.46135e-05	down	yes
TraesCS5B02G007200	7.39654	13.4543	6.12962	36.7745	33.3928	38.3905	0.248536	-2.00848	3.44679e-06	6.54725e-05	down	yes
TraesCS6A02G413400	2.92625	4.4146	3.3229	7.95749	7.33186	6.76286	0.483568	-1.04821	3.5008e-06	6.63715e-05	down	yes
TraesCS3D02G300900	2.47038	1.71587	2.26726	4.74015	4.18687	4.66446	0.47482	-1.07455	3.75839e-06	7.06981e-05	down	yes
TraesCS2D02G600900	0.01263	0	0	0.278513	0.55986	0.032041	0.0145103	-6.10678	3.86988e-06	7.25377e-05	down	yes
TraesCS1B02G315300	0.536011	0.495648	0.279473	1.1195	1.44154	1.08512	0.359593	-1.47556	4.04635e-06	7.54891e-05	down	yes
TraesCS4D02G115500	0.826245	0.836197	1.10098	1.8965	1.96517	2.42193	0.439783	-1.18514	4.19992e-06	7.80425e-05	down	yes
TraesCS4B02G091100	0.351719	0.316125	0.248687	0.837726	0.697899	0.767976	0.397869	-1.32964	4.23317e-06	7.85133e-05	down	yes
TraesCS7D02G169500	2.23276	1.93831	1.92698	3.83349	5.2486	3.97973	0.46686	-1.09894	4.24428e-06	7.8701e-05	down	yes
TraesCS2D02G102800	0.736209	1.00488	1.38048	2.11373	2.61761	2.36483	0.439895	-1.18477	4.2631e-06	7.89947e-05	down	yes
TraesCS2D02G154100	1.90425	1.96526	2.2904	4.26634	4.69282	3.56592	0.491806	-1.02384	4.33266e-06	8.01153e-05	down	yes
TraesCS2D02G333800	0.665506	0.315797	0.292829	1.11661	1.5812	2.16272	0.262138	-1.9316	4.42686e-06	8.15534e-05	down	yes
TraesCS2B02G582400	0.695046	0.456205	0.552911	1.32874	2.12909	1.62851	0.335046	-1.57757	4.89597e-06	8.90389e-05	down	yes
TraesCS2B02G112200	0.723361	0.389807	0.62003	1.58785	1.51943	1.3803	0.386221	-1.3725	4.92423e-06	8.94914e-05	down	yes
TraesCS3B02G319100	0.401549	0.391709	0.412614	0.838961	0.985426	0.766582	0.465413	-1.10342	5.2297e-06	9.43734e-05	down	yes
TraesCS2D02G451700	0.283191	0.355984	0.384693	0.68029	0.877816	0.848651	0.425414	-1.23306	5.70884e-06	0.000101885	down	yes
TraesCS2B02G612200	1.50397	1.72142	1.67566	4.43899	2.8377	3.21941	0.46694	-1.09869	5.97018e-06	0.000105813	down	yes
TraesCS3B02G136800	0.571565	0.723878	0.583812	1.21883	1.45738	1.20175	0.484598	-1.04514	5.97345e-06	0.000105847	down	yes
TraesCS3D02G168200	0.218467	0.17283	0.285324	0.777277	0.628637	0.595439	0.338082	-1.56456	6.04448e-06	0.000106938	down	yes
TraesCS1A02G216200	0	0	0	0.414845	0.209319	0.136042	0.00039463	-11.3072	6.17669e-06	0.00010901	down	yes
TraesCS5B02G232200	0.84472	0.601781	0.981279	1.76662	1.83214	1.80584	0.449207	-1.15455	6.46512e-06	0.00011352	down	yes
TraesCS3A02G417200	0.251956	0.171098	0.343276	1.07804	0.682349	0.885037	0.289681	-1.78746	6.49581e-06	0.000113908	down	yes
TraesCS5D02G333800	3.16393	2.15998	3.33705	4.86134	7.90848	5.21177	0.481657	-1.05392	6.76493e-06	0.000117976	down	yes
TraesCS3B02G282000	0.387336	0.501881	0.347542	0.836676	1.59212	1.31129	0.330676	-1.59651	6.7757e-06	0.000118112	down	yes
TraesCS5A02G555900	0.184841	0.399527	0.0855903	1.05345	0.63936	1.82068	0.190682	-2.39076	6.92656e-06	0.000120478	down	yes
TraesCS5B02G182000	0.070812	0.101805	0.149423	0.772851	1.01112	0.335166	0.151967	-2.71817	7.16642e-06	0.00012416	down	yes
TraesCS6D02G121200	0.807632	0.845222	1.13679	1.80869	2.20463	2.00054	0.463869	-1.10821	7.25852e-06	0.000125619	down	yes
TraesCS2D02G079600	0.122172	0.14613	0.0971765	0.297236	0.60293	0.632166	0.238512	-2.06787	7.34455e-06	0.000126804	down	yes
TraesCS4D02G297700	0	0	0	0.039817	0.281904	0.17649	0.000602155	-10.6976	7.55104e-06	0.00012972	down	yes
TraesCS1B02G440800	0.328481	0.298432	0.265015	1.24307	0.699515	1.04485	0.29856	-1.74391	7.80063e-06	0.000133517	down	yes
TraesCS6A02G230100	0.589754	0.757162	1.11613	2.13415	3.00797	2.19712	0.3356	-1.57518	7.88539e-06	0.000134735	down	yes
TraesCS7D02G519000	0.090644	0.043779	0.043933	0.269722	0.270555	0.209294	0.237944	-2.07131	8.12676e-06	0.000138205	down	yes
TraesCS2B02G184900	1.01145	0.994103	1.23427	2.53965	1.84667	2.61866	0.462503	-1.11247	8.40466e-06	0.000142201	down	yes
TraesCS3B02G343800	0.578821	0.932884	0.684759	1.48724	1.51718	1.99386	0.439445	-1.18625	8.80195e-06	0.000148071	down	yes
TraesCS7D02G085200	0.565133	0.769637	0.404066	1.67457	1.67471	2.39716	0.302593	-1.72455	9.34172e-06	0.000155995	down	yes
TraesCS2A02G154900	1.02201	0.487298	1.07874	1.97648	2.18933	2.4274	0.392532	-1.34912	9.76178e-06	0.000162191	down	yes
TraesCS2B02G459800	1.51057	1.4291	0.865849	3.09104	3.1497	3.10573	0.407161	-1.29633	9.77316e-06	0.000162346	down	yes
TraesCS1D02G372700	0.111674	0.128218	0.395074	1.11774	1.97708	0.602875	0.17172	-2.54187	9.84245e-06	0.000163292	down	yes
TraesCS2D02G449600	0.086335	0.022421	0.046204	0.282289	0.304448	0.349811	0.165459	-2.59546	1.01572e-05	0.000167917	down	yes
TraesCS2B02G267900	0.510615	0.146177	0.493825	1.15953	1.47752	1.75403	0.262035	-1.93217	1.02944e-05	0.000169967	down	yes
TraesCS7D02G079800	1.09005	1.13312	0.742775	2.03491	2.49815	2.71842	0.409012	-1.28978	1.05848e-05	0.000174261	down	yes
TraesCS6B02G251600	1.5507	1.06122	1.80672	2.92574	4.50726	3.46155	0.405583	-1.30193	1.06069e-05	0.000174553	down	yes
TraesCS5D02G206600	1.42409	1.23563	1.83195	2.67295	2.93486	3.49471	0.493453	-1.01901	1.1171e-05	0.000182774	down	yes
TraesCS4A02G293500	0.269506	0.240006	0.172651	1.13983	0.882546	0.587161	0.261412	-1.9356	1.20801e-05	0.000195874	down	yes
TraesCS7B02G052700	0.937401	0.66175	0.807081	2.20367	1.93374	1.58231	0.420691	-1.24917	1.2632e-05	0.000203937	down	yes
TraesCS2D02G288900	0.111503	0.195856	0.244629	0.654048	0.815324	0.691859	0.255404	-1.96914	1.27111e-05	0.000205142	down	yes
TraesCS7B02G034000	0.045144	0.081108	0.122012	0.729038	0.460093	0.577128	0.140559	-2.83075	1.33171e-05	0.000213408	down	yes
TraesCS2D02G381000	0.824571	0.312036	0.485445	1.42652	1.45835	2.23867	0.316589	-1.65932	1.34409e-05	0.000215301	down	yes
TraesCS3A02G510600	1.14638	1.10199	2.6941	5.13077	3.54342	5.11195	0.35851	-1.47991	1.34484e-05	0.000215378	down	yes
TraesCS5D02G219700	0.962534	0.715734	1.02902	2.03214	2.67184	2.00794	0.403356	-1.30988	1.36399e-05	0.000217961	down	yes
TraesCS3A02G038300	1.80043	0.918445	2.53672	4.27103	4.15278	4.63281	0.402524	-1.31285	1.39292e-05	0.000222049	down	yes
TraesCS2D02G046600	3.77257	1.48693	5.28584	12.9465	8.94601	10.8513	0.322056	-1.63462	1.40434e-05	0.000223656	down	yes
TraesCS3B02G096400	2.49917	1.89863	2.72908	4.23982	5.07376	4.98431	0.498456	-1.00446	1.44259e-05	0.000229047	down	yes
TraesCS3A02G381500	0.198552	0.180385	0.296997	0.759596	0.783591	0.829142	0.284925	-1.81135	1.57966e-05	0.000247739	down	yes
TraesCS4D02G096000	0.540612	0.611274	0.571273	1.03612	1.56419	1.23825	0.448908	-1.15551	1.59781e-05	0.00025019	down	yes
TraesCS5D02G408100	0.405804	0.459339	0.564548	1.70424	0.975512	2.10967	0.29851	-1.74415	1.60084e-05	0.000250528	down	yes
TraesCS2A02G051700	1.23129	2.17006	0.900931	4.31957	3.14401	4.34663	0.364284	-1.45686	1.62646e-05	0.000254225	down	yes
TraesCS7D02G085100	2.85329	1.824	2.73936	4.53805	5.0813	5.43119	0.492783	-1.02098	1.64899e-05	0.000257291	down	yes
TraesCS1A02G195200	1.07859	0.634052	0.895095	1.81265	2.25276	1.76071	0.447595	-1.15973	1.67777e-05	0.000261319	down	yes
TraesCS4B02G054400	1.32365	1.52405	1.48696	2.93038	3.55427	2.51323	0.481742	-1.05367	1.73632e-05	0.000269171	down	yes
TraesCS3A02G110100	5.88079	9.88953	4.89794	16.5183	12.8053	18.6825	0.430535	-1.2158	1.77461e-05	0.000274464	down	yes
TraesCS6D02G099100	0.979741	0.716872	1.08085	2.48113	2.32358	1.91457	0.413357	-1.27454	1.78755e-05	0.000275982	down	yes
TraesCS2A02G415800	0.186758	0.248155	0.327933	0.807292	0.784629	1.26284	0.267219	-1.90391	1.81353e-05	0.00027956	down	yes
TraesCS6D02G087200	0.811035	1.26232	0.794327	1.89292	2.05308	1.96043	0.485519	-1.0424	1.81926e-05	0.000280304	down	yes
TraesCS7A02G421600	0.331884	0.260808	0.309594	0.750175	0.857894	0.607985	0.407159	-1.29634	1.81942e-05	0.000280304	down	yes
TraesCS5A02G185700	0.044058	0	0.083848	0.510473	0.449633	0.372706	0.095967	-3.38132	1.86194e-05	0.000286021	down	yes
TraesCS4A02G075000	0.724806	0.594033	0.794654	1.37294	1.68544	1.47833	0.465865	-1.10202	1.95998e-05	0.000299403	down	yes
TraesCS3A02G102100	0.293788	0.469355	0.657745	1.2956	1.30125	1.33398	0.361473	-1.46804	1.99354e-05	0.000303595	down	yes
TraesCS6D02G174200	1.13677	1.94651	1.18899	3.68708	5.10822	2.71036	0.371319	-1.42927	2.18378e-05	0.000329284	down	yes
TraesCS4D02G144400	0.531465	0.434336	0.496005	1.07428	1.24685	1.02618	0.43671	-1.19525	2.19851e-05	0.000331315	down	yes
TraesCS4B02G389300	0.233827	0.245789	0.222957	0.925944	0.594133	0.818778	0.300392	-1.73508	2.26757e-05	0.000340431	down	yes
TraesCS3B02G397900	0.978685	0.810274	0.734275	1.95304	2.11814	1.35035	0.46541	-1.10343	2.3309e-05	0.000348884	down	yes
TraesCS4B02G127100	0.277398	0.29024	0.173172	0.628315	0.909837	0.684571	0.333289	-1.58515	2.5661e-05	0.000380006	down	yes
TraesCS5A02G183600	0.31624	0.159119	0.57758	1.28014	1.8455	1.23759	0.241321	-2.05098	2.63368e-05	0.000388637	down	yes
TraesCS2B02G394900	0	0	0	0.127299	0.601528	0.205679	0.000321025	-11.605	2.64943e-05	0.000390453	down	yes
TraesCS6B02G291900	0.09496	0.147736	0.102585	0.308076	0.353263	0.442592	0.312774	-1.67681	2.77327e-05	0.000407193	down	yes
TraesCS7B02G110300	0.804253	1.54624	0.944274	2.45052	3.08249	3.49319	0.365022	-1.45394	2.80898e-05	0.00041175	down	yes
TraesCS4B02G176900	0.106692	0.077763	0.173244	0.502186	0.765372	0.666637	0.184934	-2.43492	2.89455e-05	0.000422748	down	yes
TraesCS1B02G248400	1.87029	2.21682	1.10221	3.49338	4.59757	3.80423	0.436254	-1.19676	2.90695e-05	0.000424466	down	yes
TraesCS5D02G194700	0.660996	0.702254	0.206386	2.41007	3.39267	1.61154	0.211705	-2.23988	2.93022e-05	0.000427628	down	yes
TraesCS6B02G068700	0	0	0	0.107764	0.053685	0.197625	0.000835482	-10.2251	3.00865e-05	0.000437399	down	yes
TraesCS5B02G244200	3.48605	2.13817	3.621	5.01631	6.65227	7.12732	0.491874	-1.02364	3.13939e-05	0.000453546	down	yes
TraesCS5B02G030000	0	0	0	0.140824	0.183306	0.096923	0.000712499	-10.4548	3.14798e-05	0.000454563	down	yes
TraesCS5A02G295400	0.507602	0.533709	0.237919	1.10819	1.40022	1.30552	0.33541	-1.576	3.30365e-05	0.000474453	down	yes
TraesCS7B02G277800	1.50156	1.80043	2.12962	4.27913	3.6608	3.33679	0.481665	-1.0539	3.31841e-05	0.000476315	down	yes
TraesCS3D02G280900	0.185361	0.210442	0.133689	0.70878	0.739728	0.537859	0.266563	-1.90745	3.73354e-05	0.000527698	down	yes
TraesCS3D02G440500	0.19762	0.302936	0.140704	0.824211	0.672017	0.812717	0.277729	-1.84825	3.80397e-05	0.000535943	down	yes
TraesCS7A02G537900	0	0	0	0.194762	0.043887	0.227678	0.000643325	-10.6022	3.82649e-05	0.000538536	down	yes
TraesCS4D02G064800	0.042986	0	0.084694	0.326318	0.880879	0.422904	0.0783264	-3.67436	3.9681e-05	0.000555024	down	yes
TraesCS5D02G068000	2.15828	1.67445	3.53195	5.04793	6.17342	5.67035	0.435993	-1.19762	3.98315e-05	0.000556541	down	yes
TraesCS7D02G041300	0.854279	0.729898	1.14678	1.50754	2.06694	2.50178	0.449447	-1.15378	4.01956e-05	0.000561233	down	yes
TraesCS2B02G170800	0	0	0	0.14425	0.052282	0.205457	0.000746289	-10.388	4.04497e-05	0.000564583	down	yes
TraesCS7B02G380300	1.13113	0.631194	0.862153	1.88814	2.12148	1.8782	0.445747	-1.1657	4.11381e-05	0.000572581	down	yes
TraesCS4A02G103900	12.936	20.0428	9.80867	27.8769	28.5503	29.8895	0.495703	-1.01245	4.24279e-05	0.000587752	down	yes
TraesCS3D02G097200	0.615946	0.472709	0.465581	1.09501	1.16704	1.20128	0.44877	-1.15595	4.31815e-05	0.000596215	down	yes
TraesCS3D02G034300	0.138333	0.176631	0.147939	0.509884	0.351117	0.410017	0.364199	-1.4572	4.47926e-05	0.000615784	down	yes
TraesCS1D02G236900	0.553724	0.58059	0.611657	1.41279	2.00982	1.05308	0.390101	-1.35808	4.92568e-05	0.000669045	down	yes
TraesCS4A02G363100	0.107762	0.160615	0.135747	0.436452	0.372632	0.256151	0.379375	-1.3983	5.09332e-05	0.000687819	down	yes
TraesCS3A02G117600	0.304308	0.563765	0.198367	0.991816	1.28609	0.901486	0.335422	-1.57595	5.09993e-05	0.000688361	down	yes
TraesCS6B02G330900	0.142012	0.198445	0.30844	0.666051	0.846945	0.63162	0.30257	-1.72466	5.80497e-05	0.000768657	down	yes
TraesCS2D02G347500	0.787886	0.532516	0.911816	2.02454	1.64372	1.91051	0.400128	-1.32147	5.81936e-05	0.000770408	down	yes
TraesCS4A02G150500	1.16939	0.62938	0.963813	1.71092	1.94319	2.00842	0.48787	-1.03543	5.87369e-05	0.000776643	down	yes
TraesCS4A02G442100	0.466032	0.432793	0.863621	1.53198	1.48456	1.2764	0.410545	-1.28439	5.93205e-05	0.000783032	down	yes
TraesCS7A02G241400	0.110226	0.245215	0.260085	0.904826	0.726152	0.929075	0.240435	-2.05628	5.98e-05	0.000788652	down	yes
TraesCS6A02G207500	0.135199	0.094433	0.243941	0.38993	0.647862	0.390751	0.331508	-1.59289	5.98784e-05	0.000789422	down	yes
TraesCS3B02G306000	0.402534	0.535661	0.946361	1.91307	1.64506	2.09757	0.333214	-1.58548	6.01549e-05	0.000792674	down	yes
TraesCS5B02G376500	0.814151	0.317721	0.597354	2.45439	2.05598	0.872267	0.32126	-1.63819	6.04368e-05	0.000795728	down	yes
TraesCS3D02G245400	0.575159	0.537725	0.838136	1.3129	1.61225	1.23257	0.469253	-1.09156	6.11039e-05	0.000802438	down	yes
TraesCS6D02G372000	0.413597	0.324043	0.329148	0.918383	1.28774	0.813801	0.35325	-1.50124	6.32138e-05	0.000826264	down	yes
TraesCS3B02G429200	2.09113	1.61273	3.72651	6.76544	4.9569	6.07743	0.417442	-1.26035	6.45548e-05	0.000842129	down	yes
TraesCS1A02G171000	0.132321	0.086553	0.0711522	0.463556	0.647186	0.318217	0.202963	-2.30071	6.52852e-05	0.000850539	down	yes
TraesCS3D02G160100	1.3938	1.47699	1.79567	2.82558	2.92805	4.13114	0.472086	-1.08288	6.64215e-05	0.000864067	down	yes
TraesCS6A02G223200	0	0	0	0.237828	0.550416	0.480142	0.000236521	-12.0457	6.69325e-05	0.000870287	down	yes
TraesCS3B02G264200	0.870778	0.389622	0.667423	1.78709	2.01324	1.3455	0.374638	-1.41643	6.77869e-05	0.000879955	down	yes
TraesCS2A02G365300	0.447873	0.459778	0.140078	1.39454	1.60198	1.08946	0.256421	-1.96342	7.5741e-05	0.000968799	down	yes
TraesCS3B02G136100	0.576688	0.47826	0.642763	1.15658	1.1147	1.12588	0.499745	-1.00074	7.60392e-05	0.000971831	down	yes
TraesCS2A02G458000	0	0	0	0.425313	0.349844	0.189571	0.000310968	-11.6509	7.64327e-05	0.000976232	down	yes
TraesCS4B02G210100	1.04299	0.940187	1.17668	2.14434	2.70784	1.78823	0.475852	-1.07142	8.08908e-05	0.0010233	down	yes
TraesCS5A02G148600	0.113441	0.096524	0.198201	0.856922	0.48452	0.640872	0.205904	-2.27996	8.28107e-05	0.00104376	down	yes
TraesCS1A02G180400	0.538214	0.602689	0.729999	1.27395	1.69396	1.1947	0.449455	-1.15375	8.39261e-05	0.00105514	down	yes
TraesCS5A02G388800	0.113569	0.279278	0.127038	0.516663	0.620529	0.545249	0.309006	-1.69429	8.6664e-05	0.00108407	down	yes
TraesCS5D02G014300	11.9185	17.6657	9.36858	36.4791	29.5976	43.2477	0.356304	-1.48882	8.7055e-05	0.00108828	down	yes
TraesCS1A02G326800	8.02925	4.95274	12.0559	17.5609	14.9039	18.6338	0.489994	-1.02917	8.76866e-05	0.00109497	down	yes
TraesCS1A02G436600	2.15928	1.89825	3.4989	4.68822	5.27399	5.37857	0.492571	-1.0216	9.03491e-05	0.00112397	down	yes
TraesCS7A02G004000	0.445256	0.323521	0.361876	0.770395	1.15497	0.703393	0.43011	-1.21722	9.15735e-05	0.00113796	down	yes
TraesCS5B02G187200	0.391795	0.554057	0.281174	1.26852	1.60903	1.29204	0.29428	-1.76474	9.37334e-05	0.00116134	down	yes
TraesCS1D02G009600	0.954807	0.893954	0.506884	2.32496	1.35129	2.8291	0.362109	-1.46551	9.41801e-05	0.00116561	down	yes
TraesCS6A02G349400	0.06322	0.100911	0.124284	0.334229	0.366781	0.325793	0.280886	-1.83194	9.51787e-05	0.00117581	down	yes
TraesCS3B02G521400	1.3555	1.21463	1.96797	3.41196	2.4844	3.26979	0.495093	-1.01423	9.66428e-05	0.00119218	down	yes
TraesCS1A02G220100	0.260461	0.238503	0.213315	0.698946	0.534391	0.604655	0.387531	-1.36762	0.000100347	0.00123081	down	yes
TraesCS3B02G203200	1.33641	2.16839	4.15681	6.43221	7.96509	6.1452	0.372964	-1.42289	0.00010181	0.0012476	down	yes
TraesCS2A02G572500	1.11054	0.774162	0.461401	2.09976	1.79017	2.35727	0.375545	-1.41294	0.000101981	0.0012495	down	yes
TraesCS4D02G269100	0.289539	0.286232	0.334014	0.508627	0.944954	0.876566	0.390441	-1.35682	0.000102849	0.00125936	down	yes
TraesCS3B02G275200	1.0354	0.859378	1.03704	2.0612	1.71644	2.55798	0.46275	-1.11169	0.000104287	0.001275	down	yes
TraesCS2D02G539400	0.616301	0.842374	1.17283	2.10349	2.64159	1.78215	0.403158	-1.31058	0.000105822	0.00129118	down	yes
TraesCS6A02G146000	0	0	0	0.04377	0.265558	0.121464	0.000696392	-10.4878	0.000105902	0.00129176	down	yes
TraesCS1B02G440300	0.566041	0.390361	0.5399	1.29924	1.46861	1.1409	0.382808	-1.38531	0.000106577	0.0012986	down	yes
TraesCS3B02G365000	0.684522	0.580953	0.56792	1.3179	1.46286	1.09678	0.472824	-1.08062	0.00010804	0.0013136	down	yes
TraesCS7B02G306500	0.984352	1.14979	1.92283	3.23413	3.29333	2.94438	0.42832	-1.22324	0.000109934	0.00133418	down	yes
TraesCS6B02G359500	0.787081	1.24371	0.876987	2.15217	2.45524	1.85384	0.450033	-1.1519	0.000110251	0.00133782	down	yes
TraesCS3B02G421400	0	0	0	0.119015	0.122543	0.272015	0.000584143	-10.7414	0.000113916	0.00137514	down	yes
TraesCS7B02G313300	0.167564	0.299255	0.250206	0.556262	0.614394	0.756257	0.372111	-1.4262	0.000114159	0.00137743	down	yes
TraesCS6A02G233100	0.080362	0	0.097034	0.364366	0.49275	0.489242	0.13176	-2.92402	0.000114583	0.00138152	down	yes
TraesCS7D02G419600	0.16686	0.194116	0.252087	0.814458	0.641723	0.794627	0.272375	-1.87634	0.000116215	0.00139823	down	yes
TraesCS6D02G354500	0.45553	0.120173	0.273183	1.18354	1.00463	1.07976	0.259763	-1.94473	0.000118192	0.00141965	down	yes
TraesCS2D02G124500	9.85821	9.60119	20.3528	29.3883	24.8475	25.8687	0.497003	-1.00867	0.000120097	0.00143947	down	yes
TraesCS4A02G097400	1.74042	2.68957	0.707146	9.36812	6.42595	12.5243	0.181406	-2.46271	0.000123704	0.00147603	down	yes
TraesCS2D02G372200	0.195466	0.25841	0.056119	0.647375	1.03601	0.826905	0.203162	-2.2993	0.000124003	0.00147893	down	yes
TraesCS7A02G395200	0.38445	0.473052	0.651238	1.04903	1.69351	1.20387	0.382307	-1.3872	0.000127635	0.001517	down	yes
TraesCS1B02G107400	0.101449	0.166932	0.218213	0.718003	0.472276	0.631742	0.267063	-1.90475	0.000132465	0.00156948	down	yes
TraesCS6D02G245900	1.16628	0.928073	0.709726	1.76132	2.09446	2.06899	0.473281	-1.07923	0.00014317	0.00167862	down	yes
TraesCS6D02G250000	0.076781	0.068312	0.072696	0.297179	0.226248	0.197521	0.302087	-1.72696	0.000144816	0.00169608	down	yes
TraesCS4A02G070900	1.11008	0.6982	1.31555	2.00783	2.47928	2.62493	0.439232	-1.18695	0.000150162	0.00174992	down	yes
TraesCS7D02G429500	0.29244	0.267951	0.175613	0.527853	0.969161	0.679988	0.338081	-1.56456	0.000156989	0.00181909	down	yes
TraesCS3D02G237100	0.55587	0.368471	0.250491	0.944945	1.36495	0.858926	0.370748	-1.43149	0.000162657	0.00187273	down	yes
TraesCS6A02G126500	0.346437	0.320662	0.285062	0.90764	1.05568	0.642089	0.365456	-1.45223	0.000163842	0.00188418	down	yes
TraesCS6B02G280400	0.379574	0.262353	0.122911	0.708328	0.658422	1.13217	0.306068	-1.70808	0.000169242	0.00193776	down	yes
TraesCS2A02G476300	0.813443	1.34013	1.52006	2.60839	2.7193	3.23908	0.428823	-1.22155	0.00017332	0.00197629	down	yes
TraesCS6A02G208800	0.353119	0.453641	0.25981	0.852027	0.832735	0.901443	0.412407	-1.27786	0.000173647	0.001979	down	yes
TraesCS1B02G233400	0.02538	0.041361	0.128816	0.242525	0.419318	0.407471	0.182881	-2.45102	0.000176431	0.00200487	down	yes
TraesCS3D02G534500	0	0	0	0.091545	0.103804	0.0927	0.00104149	-9.90714	0.000179248	0.00203222	down	yes
TraesCS7D02G368800	0.109384	0	0.093801	0.485111	0.413435	0.578519	0.13756	-2.86187	0.000185375	0.00209094	down	yes
TraesCS5D02G021400	1.0439	0.531108	1.11022	2.40656	2.61826	1.70087	0.399249	-1.32464	0.000187362	0.00211005	down	yes
TraesCS4B02G074100	0.235234	0.147626	0.202465	0.64192	0.442243	0.571504	0.353528	-1.5001	0.000189363	0.00212807	down	yes
TraesCS1B02G440600	0	0.034869	0.026397	0.442758	0.144937	0.328822	0.0668466	-3.903	0.000190031	0.00213394	down	yes
TraesCS6D02G008900	0.0635154	0.078661	0	0.509265	0.33205	0.437861	0.111147	-3.16946	0.000196859	0.00220016	down	yes
TraesCS7A02G157300	0.373383	0.376496	0.512941	1.54762	1.04924	0.808651	0.370816	-1.43122	0.000203278	0.00226141	down	yes
TraesCS4D02G325700	0.025191	0	0	0.255561	0.212246	0.186062	0.0385261	-4.69802	0.000204474	0.00227279	down	yes
TraesCS3D02G119400	0.399004	0.730243	0.395673	0.99462	1.2093	1.2113	0.446507	-1.16324	0.000222131	0.0024407	down	yes
TraesCS4B02G278300	0	0	0	0.154107	0.121798	0.093178	0.000812825	-10.2648	0.000224001	0.00245814	down	yes
TraesCS2B02G615000	0.362209	0.155165	0.203326	0.669328	0.920862	0.855237	0.294713	-1.76262	0.000226588	0.00247939	down	yes
TraesCS6B02G118600	0.445067	0.400537	0.571589	0.970801	1.34366	1.07408	0.418232	-1.25763	0.000232639	0.00253234	down	yes
TraesCS2D02G449700	0.049385	0.026856	0.035165	0.176221	0.224574	0.185473	0.190026	-2.39573	0.000236183	0.00256494	down	yes
TraesCS7B02G316700	0.269202	0.130236	0.257004	0.546236	0.578381	0.570149	0.387335	-1.36835	0.000238713	0.0025864	down	yes
TraesCS2B02G347200	1.96611	2.50136	1.95875	3.57705	4.42107	5.4726	0.47705	-1.06779	0.000245289	0.00264539	down	yes
TraesCS4B02G341900	0.579985	0.383591	0.297446	1.08286	1.03232	1.28239	0.371153	-1.42991	0.000246527	0.00265766	down	yes
TraesCS1D02G157000	0.347623	0.194138	0.173628	0.625939	0.771629	0.652393	0.348977	-1.5188	0.000252191	0.00271172	down	yes
TraesCS6B02G134800	0.796468	0.374272	0.6124	1.45198	1.60077	1.60482	0.382847	-1.38516	0.000255847	0.00274546	down	yes
TraesCS5D02G234400	0.669987	0.914962	0.584735	2.71354	1.94153	2.34666	0.309878	-1.69023	0.000261646	0.00280012	down	yes
TraesCS3A02G272200	1.3907	0.450646	1.16852	2.33016	2.74138	3.03019	0.371509	-1.42853	0.000262521	0.00280835	down	yes
TraesCS6A02G083900	0	0	0.0460907	0.335508	0.203708	0.173708	0.0646502	-3.9512	0.000268385	0.00286201	down	yes
TraesCS7A02G222200	0.879663	0.992573	0.494337	2.28144	1.57812	2.06921	0.399168	-1.32493	0.000269319	0.00286947	down	yes
TraesCS1B02G343100	0.351651	0.366887	0.183001	0.688437	0.795845	0.752692	0.403018	-1.31109	0.000276864	0.00293774	down	yes
TraesCS3B02G079100	0	0	0	0.079673	0.195031	0.147399	0.000710727	-10.4584	0.000280193	0.00296758	down	yes
TraesCS2A02G066400	0.027992	0.039598	0.05138	0.247269	0.249692	0.372472	0.136836	-2.86948	0.000283709	0.00299945	down	yes
TraesCS5D02G388800	0.307838	0.438712	0.277948	0.716922	0.685218	1.15096	0.401277	-1.31733	0.000285361	0.00301388	down	yes
TraesCS7A02G538500	0	0	0	0.209416	0.060954	0.105682	0.000797762	-10.2918	0.000288084	0.00303681	down	yes
TraesCS7B02G153900	2.03693	1.71932	1.22288	3.42832	4.24069	2.41946	0.493547	-1.01874	0.000292841	0.00307919	down	yes
TraesCS3D02G309700	0.672508	1.04367	0.649982	1.62076	1.28976	2.04691	0.477296	-1.06705	0.000302975	0.00316938	down	yes
TraesCS7B02G134900	0	0	0	0.068249	0.027509	0.110841	0.00145209	-9.42766	0.000305425	0.00319169	down	yes
TraesCS2D02G293200	0.140677	0.134796	0.084762	0.55221	0.325918	0.42042	0.277414	-1.84989	0.000316282	0.00328608	down	yes
TraesCS2D02G529300	0	0	0	0.076728	0.172407	0.152811	0.000746369	-10.3878	0.000316607	0.00328903	down	yes
TraesCS5B02G533100	0.815979	1.10535	0.781266	2.28009	1.6152	2.03199	0.455959	-1.13302	0.00035129	0.00359293	down	yes
TraesCS7D02G223900	0.180833	0.301787	0.066956	1.2383	0.572206	0.803814	0.210218	-2.25004	0.000351433	0.00359393	down	yes
TraesCS3B02G006000	0.305615	0.195576	0.40713	0.935899	0.596735	1.1612	0.337186	-1.56838	0.000353142	0.00360642	down	yes
TraesCS1D02G206600	0.48656	0.406136	0.624465	1.04888	1.10492	0.933409	0.491435	-1.02493	0.000358992	0.00365429	down	yes
TraesCS7A02G375800	1.16551	0.828984	1.49048	2.1075	2.49413	2.40136	0.497641	-1.00682	0.000362583	0.00368471	down	yes
TraesCS5D02G178200	0	0	0	0.0454832	0.170288	0.360973	0.000520161	-10.9088	0.000369727	0.00374532	down	yes
TraesCS7D02G354000	0.249688	0.095251	0.191495	0.691596	0.519797	0.540628	0.30618	-1.70755	0.000376323	0.00379897	down	yes
TraesCS1A02G221000	0	0.010251	0	0.090075	0.180334	0.074392	0.0297302	-5.07193	0.000380369	0.00383357	down	yes
TraesCS6B02G175600	0.296835	0.163477	0.283696	0.795947	0.69926	0.568887	0.360453	-1.47212	0.000381106	0.00383857	down	yes
TraesCS1A02G410700	0.279108	0.314387	0.108065	1.00631	1.18265	0.909284	0.226438	-2.14281	0.000382278	0.0038489	down	yes
TraesCS1B02G363000	0.309472	0.432528	0.322703	0.889373	0.832412	0.632523	0.452236	-1.14485	0.000383153	0.00385625	down	yes
TraesCS7D02G402100	0.697365	0.673394	0.421379	1.32492	1.52002	1.41854	0.420346	-1.25035	0.000390462	0.00391732	down	yes
TraesCS3A02G447800	0	0	0.081278	0.250036	0.611127	0.341643	0.0675737	-3.8874	0.000391211	0.00392391	down	yes
TraesCS4A02G248900	0.245022	0.581742	0.549381	1.87324	1.35206	1.0776	0.319818	-1.64468	0.000400517	0.00400361	down	yes
TraesCS4A02G400000	0	0	0	0.086025	0.053566	0.143778	0.00105869	-9.8835	0.000416165	0.0041304	down	yes
TraesCS7A02G168700	0.656418	1.07836	1.02982	2.1907	1.85348	2.05947	0.452942	-1.1426	0.000425471	0.00420696	down	yes
TraesCSU02G131800	0.031537	0	0.025968	0.15498	0.208485	0.233481	0.096332	-3.37584	0.000431105	0.00425422	down	yes
TraesCS4D02G207800	1.32423	2.89471	1.08437	8.70555	4.90869	9.99071	0.224669	-2.15413	0.000432664	0.00426642	down	yes
TraesCS1A02G011100	0.38311	0.651713	0.693918	1.36388	1.64486	1.81672	0.358254	-1.48094	0.000441809	0.00434527	down	yes
TraesCS5D02G228900	0.963351	0.79857	1.15975	2.31442	2.03501	1.79403	0.475575	-1.07226	0.000452228	0.00443182	down	yes
TraesCS1B02G162100	0.220812	0.219993	0.175636	0.493958	0.488491	0.469508	0.424559	-1.23596	0.000483408	0.00468993	down	yes
TraesCS6D02G167800	0	0	0	0.083382	0.138963	0.176121	0.000752887	-10.3753	0.000488417	0.00473118	down	yes
TraesCS5B02G444500	0	0.08799	0.102788	0.449958	0.383772	0.706571	0.123858	-3.01325	0.000496298	0.00479448	down	yes
TraesCS4D02G129900	0.74959	1.21162	0.914927	1.62695	2.31318	1.84314	0.49732	-1.00775	0.00050311	0.00485143	down	yes
TraesCS7D02G453500	0	0	0	0.208896	0.111618	0.353555	0.000445058	-11.1337	0.000504143	0.00485846	down	yes
TraesCS3B02G200700	0.214917	0.44298	0.313761	0.981755	0.704887	0.82868	0.386296	-1.37222	0.000507072	0.00488136	down	yes
TraesCS3D02G188200	0.243704	0.241353	0.308611	0.513782	0.653881	0.526517	0.468468	-1.09398	0.000510526	0.00490925	down	yes
TraesCS5A02G063700	0	0	0	0.141058	0.237256	0.216857	0.000504057	-10.9541	0.000517893	0.00496801	down	yes
TraesCS2A02G335400	0.318116	0.228898	0.161578	0.483358	0.671157	0.592887	0.405512	-1.30219	0.000530611	0.00507107	down	yes
TraesCS2B02G078700	0.128352	0.259412	0.093391	0.478654	0.614605	0.838161	0.24912	-2.00509	0.000531801	0.00508122	down	yes
TraesCS2B02G175700	0.30389	0.2984	0.419755	0.601599	0.962029	0.899597	0.414921	-1.26909	0.000545048	0.0051872	down	yes
TraesCS2D02G246100	0.534745	0.420958	0.383063	0.920372	1.17572	0.718377	0.475673	-1.07196	0.000553396	0.00525657	down	yes
TraesCS4D02G207900	0.051355	0.075416	0	0.2843	0.218737	0.819962	0.0958209	-3.38352	0.000555453	0.00527338	down	yes
TraesCS2B02G489800	0.680885	0.619152	0.652322	1.30704	1.47401	1.30113	0.478264	-1.06412	0.000561825	0.00532326	down	yes
TraesCS7B02G129600	0.388985	0.213828	0.33622	0.81278	0.655618	0.915258	0.393947	-1.34393	0.00056679	0.00536455	down	yes
TraesCS4B02G300300	0.437546	0.31655	0.258806	0.709587	0.777383	0.745172	0.45378	-1.13993	0.000567571	0.0053713	down	yes
TraesCS5D02G401800	3.15076	1.66201	2.9595	5.98687	5.30095	4.45336	0.493753	-1.01814	0.000578147	0.00545773	down	yes
TraesCS3D02G396500	0.105826	0.0939471	0.105777	0.258012	0.233576	0.427938	0.332291	-1.58948	0.000586579	0.00552812	down	yes
TraesCS3A02G248000	0.312794	0.400894	0.656536	1.15206	0.854557	1.07993	0.443934	-1.17158	0.000596759	0.00561341	down	yes
TraesCS7D02G206400	0.250996	0.183948	0.037931	0.726794	0.78064	0.844461	0.201061	-2.31429	0.000616449	0.00577059	down	yes
TraesCS5B02G294900	0.415002	0.389612	0.498426	0.657933	1.1775	1.45493	0.396018	-1.33636	0.000617893	0.00577935	down	yes
TraesCS1D02G255100	0.3586	0.286748	0.26264	0.550683	0.664494	0.871225	0.435193	-1.20027	0.000643612	0.00597697	down	yes
TraesCS3B02G173900	0.604517	0.451911	0.370882	1.06238	1.066	1.56047	0.386925	-1.36987	0.000650322	0.006028	down	yes
TraesCS1A02G307200	0.398163	0.404394	0.154634	0.804856	1.09238	0.816201	0.352759	-1.50324	0.000651723	0.00603887	down	yes
TraesCS7A02G359800	1.48133	0.692687	1.44645	2.38486	2.57979	2.76987	0.468092	-1.09514	0.000658768	0.0060875	down	yes
TraesCS1D02G198700	0.827649	0.547046	0.999427	1.25129	1.71991	2.02298	0.475379	-1.07285	0.000662815	0.00611526	down	yes
TraesCS7D02G550200	0.092711	0.160726	0.258583	0.734333	0.414904	1.21191	0.216853	-2.20521	0.000672632	0.00619575	down	yes
TraesCS2A02G451900	0.206549	0.310987	0.472252	0.645258	1.11214	0.646533	0.411737	-1.2802	0.000682405	0.00626905	down	yes
TraesCS1A02G029100	0.0682293	0.0922045	0.190199	0.428497	0.339295	0.390675	0.30267	-1.72418	0.000689965	0.00632606	down	yes
TraesCS7A02G368500	0.018047	0	0.055465	0.286704	0.291404	0.131268	0.103629	-3.2705	0.000693712	0.00635748	down	yes
TraesCS7D02G450900	0.159752	0.098279	0.19748	0.605944	0.463388	0.460613	0.29773	-1.74792	0.000716256	0.00652943	down	yes
TraesCS1B02G229000	0.264843	0.155237	0.266378	0.62379	0.63355	0.535431	0.382903	-1.38495	0.000726852	0.00660689	down	yes
TraesCS7D02G173700	0.10928	0	0	0.313049	0.452647	0.980956	0.0625654	-3.99849	0.000731877	0.00664658	down	yes
TraesCS6A02G166000	0	0.038967	0.022671	0.128492	0.138507	0.291045	0.110454	-3.17849	0.000765764	0.00691228	down	yes
TraesCS7A02G424100	2.54747	2.19684	0.82966	7.33757	4.81626	9.85596	0.25325	-1.98137	0.000767669	0.00692419	down	yes
TraesCS2D02G081900	0	0	0	0.037965	0.076612	0.189641	0.000986135	-9.98593	0.000771593	0.00695484	down	yes
TraesCSU02G034600	0.341237	0.18258	0.181922	0.709152	0.564587	0.739858	0.350487	-1.51257	0.000773	0.00696515	down	yes
TraesCS3A02G136300	0.751188	0.699069	0.677524	1.82867	1.38859	1.31562	0.46941	-1.09108	0.000775322	0.00698529	down	yes
TraesCS2A02G334000	1.3403	1.25172	1.13143	2.49438	2.08739	3.61723	0.454134	-1.13881	0.000780908	0.00702775	down	yes
TraesCS7A02G332100	0.265554	0.284531	0.243975	0.567055	0.873615	0.674452	0.37542	-1.41342	0.000783103	0.0070442	down	yes
TraesCS5A02G196700	0.1298	0.412787	0	1.50921	1.9859	0.779575	0.12693	-2.97789	0.000820905	0.00731809	down	yes
TraesCS3A02G184000	0.030439	0.185403	0.090773	0.432966	0.380414	0.379307	0.257079	-1.95972	0.000835414	0.00742367	down	yes
TraesCS3D02G222800	0.655958	0.284394	0.765772	1.30241	1.63991	1.23997	0.40794	-1.29357	0.000911048	0.00798527	down	yes
TraesCS5A02G110200	0.640328	0.512066	0.569229	0.881109	1.37285	1.25946	0.490014	-1.02911	0.000916316	0.00802701	down	yes
TraesCS3D02G379200	0	0.0126	0	0.111292	0.059501	0.098104	0.0468581	-4.41556	0.00092295	0.00806822	down	yes
TraesCS5A02G008900	4.90057	9.92218	3.94916	20.333	17.5303	26.4802	0.291745	-1.77722	0.000947843	0.00825403	down	yes
TraesCS4D02G232400	0.429302	0.213456	0.300171	0.929965	0.609965	0.847913	0.394887	-1.34049	0.000961474	0.00834985	down	yes
TraesCS7B02G350400	0.769772	0.690059	0.831923	1.52781	1.82484	1.66792	0.456473	-1.1314	0.000993309	0.00857287	down	yes
TraesCS7D02G203800	0.127974	0.090067	0.089462	0.496999	0.418333	0.245136	0.264982	-1.91603	0.00100103	0.00862636	down	yes
TraesCS3A02G284800	0.681081	0.257591	0.643751	1.34935	1.04983	1.3438	0.422771	-1.24205	0.00100778	0.00867513	down	yes
TraesCS1B02G369000	2.37055	1.32202	3.36118	4.67922	6.03131	4.42027	0.466185	-1.10103	0.00103858	0.00889256	down	yes
TraesCS5D02G243500	0.406987	0.588357	0.804316	1.40949	1.75135	1.07501	0.424865	-1.23493	0.00110478	0.00932624	down	yes
TraesCS6A02G110200	0.321794	0.285678	0.515923	0.805488	1.14457	0.699465	0.423999	-1.23787	0.00111902	0.00942834	down	yes
TraesCS4B02G037400	0.369673	0.378004	0.287504	0.919549	0.919989	0.689958	0.409244	-1.28897	0.00115841	0.00970772	down	yes
TraesCS3B02G536200	1.39965	0.667846	1.7123	2.56252	3.33943	2.68623	0.440116	-1.18405	0.00115862	0.00970844	down	yes
TraesCS6B02G442600	0	0	0	0.008246	0.104252	0.024786	0.00218525	-8.83799	0.00115961	0.00971361	down	yes
TraesCS5B02G007100	49.9247	83.791	45.0758	139.456	130.453	146.431	0.429435	-1.21949	0.00117605	0.00982544	down	yes
TraesCS4A02G240900	0.334592	0.321275	0.281316	0.678896	0.63663	0.667732	0.472547	-1.08147	0.00120143	0.00999756	down	yes
TraesCS1D02G375500	0.179362	0.058717	0	0.689208	0.71594	0.29382	0.140132	-2.83515	0.00120843	0.0100474	down	yes
TraesCS5A02G309600	0.01468	0	0	0.053669	0.122805	0.205348	0.0384472	-4.70098	0.00133108	0.0108763	down	yes
TraesCS4B02G117800	0.638561	0.732347	0.985424	1.2985	2.40809	1.37051	0.464109	-1.10746	0.00133857	0.0109258	down	yes
TraesCS2A02G081100	0.331389	0.335808	0.436833	0.81891	0.769698	1.01032	0.424803	-1.23513	0.00135026	0.0110042	down	yes
TraesCS7D02G036700	0.504435	1.31949	0.73732	1.81999	1.99117	1.69849	0.464865	-1.10512	0.00135835	0.0110566	down	yes
TraesCS7D02G363000	0.283697	0.263834	0.570624	1.05736	1.16704	0.738023	0.377446	-1.40566	0.0013736	0.0111555	down	yes
TraesCS4A02G239900	0	0	0	0.033303	0.10323	0.075016	0.00141811	-9.46181	0.00141893	0.0114488	down	yes
TraesCS3A02G348300	0.589218	0.567269	0.571562	1.22094	1.29824	1.03109	0.486738	-1.03878	0.00142453	0.0114764	down	yes
TraesCS2B02G234500	0	0	0	0.044012	0.111297	0.118487	0.00109571	-9.83392	0.0014261	0.0114856	down	yes
TraesCS5A02G239400	0.12438	0.10666	0.107835	0.42969	0.363969	0.50672	0.260597	-1.94011	0.00143013	0.0115122	down	yes
TraesCS6A02G329400	0.080823	0.12863	0.09934	0.242466	0.295878	0.462503	0.308532	-1.69651	0.00143804	0.0115653	down	yes
TraesCS6B02G041300	0.059061	0.071291	0	0.235	0.384473	0.401667	0.127653	-2.9697	0.00145772	0.0116828	down	yes
TraesCS1B02G440500	0.382782	0.078297	0.197807	0.688996	0.865492	0.776237	0.282696	-1.82268	0.00147034	0.0117667	down	yes
TraesCS2B02G154700	0.744314	0.465362	0.492727	1.16589	1.18671	1.13159	0.488608	-1.03325	0.00149214	0.011916	down	yes
TraesCSU02G114400	0.468864	0.694877	0.496187	1.43268	0.870858	1.40652	0.447413	-1.16032	0.00152878	0.0121565	down	yes
TraesCS6D02G095800	0.330885	0.601621	0.3044	1.09502	0.746993	1.58204	0.361241	-1.46897	0.00154053	0.012236	down	yes
TraesCS4A02G076700	0.154112	0	0.306781	3.02044	3.00907	2.60093	0.0534032	-4.22693	0.00155053	0.0123006	down	yes
TraesCS3A02G231000	1.33749	2.60658	1.39722	3.01959	4.59783	3.66106	0.473582	-1.07831	0.00157523	0.012453	down	yes
TraesCS4D02G252100	0.159782	0.038691	0.165546	0.295686	0.558659	0.400999	0.289975	-1.786	0.00159833	0.0126055	down	yes
TraesCS3B02G414200	0.123783	0.414145	0.258979	0.53004	1.16009	1.26289	0.269862	-1.88971	0.00161224	0.0126913	down	yes
TraesCS5B02G024200	0.139921	0.049727	0.075461	0.478435	0.389195	0.300742	0.226905	-2.13984	0.00161956	0.0127338	down	yes
TraesCS1B02G209900	0.407567	0.685395	0.475826	1.45942	0.962347	1.16594	0.437268	-1.19341	0.00162859	0.0127896	down	yes
TraesCS1D02G057500	0.545853	0.142035	0.039821	1.58786	2.29635	0.795568	0.155501	-2.68501	0.00170946	0.0133102	down	yes
TraesCS4D02G072800	0.02256	0.0474917	0.0802092	0.238639	0.155305	0.256438	0.231035	-2.11382	0.0017881	0.0137927	down	yes
TraesCS3B02G099700	0.022914	0	0	0.228105	0.183784	0.049599	0.0496524	-4.33199	0.00181223	0.0139557	down	yes
TraesCS6A02G387800	0.040763	0.08979	0	0.458368	0.240637	0.291932	0.131747	-2.92416	0.0018212	0.0140088	down	yes
TraesCS3D02G466900	0.078971	0.08527	0.041851	0.528321	0.269151	0.177261	0.211434	-2.24172	0.00186279	0.0142745	down	yes
TraesCS3D02G149900	0.182652	0.178258	0.21134	0.324617	0.470384	0.491168	0.444926	-1.16836	0.00189779	0.0145035	down	yes
TraesCS7D02G471300	0.467792	0.178612	0.343034	0.763879	0.691568	0.849288	0.429307	-1.21992	0.00191681	0.0146207	down	yes
TraesCS1A02G203100	0.371208	0.313337	0.398389	0.6917	0.899079	0.611355	0.491766	-1.02396	0.00191712	0.0146217	down	yes
TraesCS2B02G516300	0.085194	0.071918	0.125625	0.283742	0.355748	0.346126	0.286863	-1.80156	0.00194114	0.0147765	down	yes
TraesCS2D02G300200	1.79919	0.514041	2.0307	2.94083	3.45855	3.50825	0.438443	-1.18954	0.00195214	0.0148475	down	yes
TraesCS1A02G422500	0	0	0	0.108675	0.050405	0.043848	0.00147836	-9.40179	0.00201331	0.0152165	down	yes
TraesCS6A02G015300	0.190241	0.285999	0.250449	0.784153	0.583109	0.606965	0.368088	-1.44188	0.0020414	0.0154009	down	yes
TraesCS4D02G120400	0.015138	0	0	0.064462	0.059711	0.208735	0.045472	-4.45888	0.00205753	0.0154903	down	yes
TraesCS5D02G054600	2.87704	3.87859	3.23954	6.63527	7.96542	5.67284	0.493015	-1.0203	0.00207782	0.0156149	down	yes
TraesCS4D02G178600	0	0	0	0.021823	0.180924	0.108166	0.0009649	-10.0173	0.00212775	0.0159313	down	yes
TraesCS5A02G454900	0	0	0	0.076825	0.088748	0.036673	0.00148334	-9.39693	0.00213425	0.015968	down	yes
TraesCS7B02G448900	0.070263	0.059746	0.1133	0.152986	0.311175	0.218085	0.356629	-1.4875	0.00214546	0.0160367	down	yes
TraesCS2B02G109900	0.195967	0.306309	0.168089	0.553808	0.542281	0.388794	0.45146	-1.14733	0.00217221	0.016191	down	yes
TraesCS6B02G153500	0.008701	0.004506	0.01211	0.08668	0.081981	0.069515	0.106295	-3.23385	0.00217709	0.0162213	down	yes
TraesCS5B02G223700	0.209744	0.312671	0.519164	0.975908	1.17635	0.73744	0.360446	-1.47215	0.00217762	0.0162222	down	yes
TraesCS3B02G488100	0.904866	0.618897	0.68072	1.99181	1.00269	1.83163	0.456781	-1.13043	0.00217791	0.0162228	down	yes
TraesCS6D02G004300	0.095107	0	0.049188	0.277229	0.214131	0.503822	0.144994	-2.78594	0.00226605	0.0167505	down	yes
TraesCS2A02G350900	0.299078	0.725114	0.415626	1.04131	1.91502	1.22822	0.344079	-1.53919	0.00227086	0.0167787	down	yes
TraesCS4D02G276600	0	0	0	0.035124	0.041953	0.113273	0.00157604	-9.30948	0.00228471	0.0168607	down	yes
TraesCS3D02G017400	0.253562	0.264519	0.598444	0.915588	0.714564	0.858982	0.44856	-1.15663	0.00231659	0.0170479	down	yes
TraesCS7A02G119300	0.214523	0.129498	0.215604	0.355879	0.499468	0.416808	0.439903	-1.18474	0.00235931	0.0172822	down	yes
TraesCS6B02G355800	0	0	0	0.10474	0.396527	0	0.000598483	-10.7064	0.00238416	0.0174353	down	yes
TraesCS2B02G599900	0.204625	0.180127	0.0220467	0.448886	0.381295	0.902897	0.234726	-2.09095	0.002394	0.017488	down	yes
TraesCS6D02G078500	0.152054	0.085167	0.216632	0.263987	0.389202	0.487397	0.397912	-1.32948	0.00240603	0.0175678	down	yes
TraesCS4D02G311300	0.217163	0.161578	0.150422	0.500426	0.482202	0.743549	0.306552	-1.7058	0.00241471	0.0176214	down	yes
TraesCS3A02G280700	0	0.040733	0	0.080518	0.456246	0.207322	0.0547423	-4.1912	0.00241837	0.0176403	down	yes
TraesCS6D02G308300	0.048948	0.106203	0.104554	0.346372	0.211019	0.373727	0.278917	-1.84209	0.00244118	0.0177721	down	yes
TraesCS3D02G287000	0.046256	0.245003	0.26722	0.707108	1.16971	0.604241	0.225097	-2.15138	0.00251616	0.0182195	down	yes
TraesCS4B02G065700	0.211832	0.167844	0.221819	0.534321	0.831283	0.516688	0.319555	-1.64587	0.00255674	0.018451	down	yes
TraesCS7D02G132700	0.029256	0.287759	0.243151	0.75849	0.987301	0.823126	0.218055	-2.19723	0.00258234	0.0185986	down	yes
TraesCS4A02G239000	0.268171	0.352468	0.532793	0.91579	0.985483	0.694395	0.444368	-1.17017	0.00264498	0.0189826	down	yes
TraesCS7B02G318200	0.379616	0.227043	0.263067	0.918223	1.44246	0.647248	0.289144	-1.79014	0.00266938	0.0191343	down	yes
TraesCS2B02G480500	0	0.041984	0.195841	0.555406	0.690517	0.629898	0.126784	-2.97955	0.00267016	0.0191343	down	yes
TraesCS5B02G001700	0.133799	0.118432	0.095022	0.403526	0.261327	0.370719	0.335325	-1.57637	0.00268918	0.0192481	down	yes
TraesCS3D02G246700	0.450718	0.345668	0.424584	0.872205	0.910588	0.794271	0.473783	-1.0777	0.00269556	0.0192881	down	yes
TraesCS5B02G275700	0.672986	0.466458	0.719272	1.40936	1.32831	1.00448	0.496696	-1.00956	0.00275455	0.0196172	down	yes
TraesCS7D02G404900	0.014475	0.096822	0.04098	0.346256	0.173138	0.298086	0.186276	-2.42449	0.00280502	0.0198939	down	yes
TraesCS1A02G214700	0.437026	0.207761	0.266054	0.640328	0.841474	0.651497	0.426964	-1.22782	0.00281827	0.0199736	down	yes
TraesCS1D02G009700	0.777983	1.40221	0.524202	2.12306	1.56451	2.95686	0.407018	-1.29684	0.00283358	0.0200678	down	yes
TraesCS5D02G516700	0	0	0	0.105222	0.161113	0.060773	0.000917128	-10.0906	0.0029063	0.0204805	down	yes
TraesCS5A02G390800	0	0	0	0.279055	0.053547	0.155321	0.000614851	-10.6675	0.00290655	0.0204805	down	yes
TraesCS7A02G357700	0.135856	0.047116	0.065749	0.38093	0.4635	0.206262	0.236721	-2.07874	0.00291921	0.020555	down	yes
TraesCS5A02G102700	0.12116	0.02761	0	0.3046	0.391912	0.343242	0.143082	-2.80509	0.00298288	0.0208996	down	yes
TraesCS7A02G268300	0	0	0	0.15484	0.059608	0.231541	0.000672662	-10.5378	0.00301163	0.0210695	down	yes
TraesCS5B02G168600	0.0828988	0.0535568	0.0738851	0.247753	0.142466	0.308816	0.300901	-1.73264	0.00308133	0.0214663	down	yes
TraesCS4A02G237000	0.036928	0.068714	0.117684	0.204402	0.293819	0.241921	0.301734	-1.72865	0.00309464	0.0215439	down	yes
TraesCS7B02G164000	0.039199	0.011498	0.057412	0.132823	0.124148	0.196285	0.238516	-2.06784	0.0031467	0.0218451	down	yes
TraesCSU02G114000	0.115036	0.135341	0.058759	0.454789	0.242021	0.293997	0.312004	-1.68036	0.00314837	0.0218548	down	yes
TraesCS7B02G142500	0.300768	0.243695	0.309581	0.600032	0.609492	0.571451	0.479537	-1.06028	0.00315025	0.0218659	down	yes
TraesCS4D02G219400	0.073631	0.122405	0.073286	0.348629	0.316272	0.22675	0.302049	-1.72715	0.00324883	0.0224014	down	yes
TraesCS7B02G146500	0.291165	0.167794	0.101191	0.700609	0.496639	0.520504	0.326095	-1.61664	0.00326476	0.0224956	down	yes
TraesCS1A02G238800	0.496322	1.11843	1.59341	2.71758	2.75158	2.31358	0.412215	-1.27853	0.00326917	0.0225201	down	yes
TraesCS4A02G383400	0.394891	0.196103	0.232471	0.520248	0.8543	0.944085	0.355151	-1.4935	0.00329358	0.0226411	down	yes
TraesCS3A02G226600	0.172626	0.067766	0.06364	0.293074	0.390003	0.53157	0.250305	-1.99824	0.00336683	0.0230469	down	yes
TraesCS3B02G322900	0.303116	0.115847	0.382159	0.821515	0.655801	0.928787	0.332954	-1.5866	0.00336779	0.0230508	down	yes
TraesCS1D02G144200	0	0	0	0.161336	0.042697	0.024692	0.00131162	-9.57444	0.00337049	0.023064	down	yes
TraesCS6A02G264900	0.114099	0.12575	0.139207	0.257511	0.255581	0.331652	0.448724	-1.1561	0.00337909	0.0231129	down	yes
TraesCS3B02G472500	0.018367	0.036123	0.013097	0.109969	0.061213	0.131193	0.22352	-2.16152	0.00340131	0.0232389	down	yes
TraesCS4A02G189600	0.034162	0	0	0.101678	0.196966	0.139395	0.0779885	-3.68059	0.00342564	0.0233669	down	yes
TraesCS3B02G052800	0.547368	0.670808	0.900646	1.40441	2.02442	1.1355	0.464213	-1.10714	0.00342624	0.023369	down	yes
TraesCS1B02G340200	9.12236	6.39151	17.5596	31.753	23.7925	30.8667	0.38274	-1.38556	0.00346659	0.0235895	down	yes
TraesCS3D02G029200	0	0	0	0.139643	0.196108	0.040565	0.000797202	-10.2928	0.00349058	0.0237214	down	yes
TraesCS2A02G125400	0.019869	0.026083	0	0.1196	0.138888	0.195568	0.101203	-3.30467	0.00349808	0.023759	down	yes
TraesCS4A02G130000	0.290246	0.404381	0.220011	0.758597	0.762916	0.715713	0.408827	-1.29044	0.00350179	0.0237781	down	yes
TraesCS3A02G252900	0.229134	0.169329	0.299126	0.654114	0.67394	0.420836	0.398875	-1.32599	0.00353981	0.0239727	down	yes
TraesCS2A02G398000	0	0	0	0.011974	0.036132	0.081355	0.0023173	-8.75334	0.00355249	0.0240504	down	yes
TraesCS1A02G028500	0	0	0	0.055106	0.067029	0	0.0024563	-8.6693	0.00355359	0.0240558	down	yes
TraesCS4A02G317400	0.231959	0.274867	0	0.957601	1.6674	0.745039	0.150392	-2.7332	0.00356465	0.0241194	down	yes
TraesCS6A02G387900	0	0.069841	0.039808	0.322467	0.18901	0.397413	0.120641	-3.05121	0.00358967	0.0242452	down	yes
TraesCS4D02G337400	0.373967	0.27364	0.337095	0.642467	0.679429	1.02604	0.41939	-1.25364	0.00370881	0.0248881	down	yes
TraesCS6B02G295900	0.117942	0.101294	0.070876	0.347243	0.319899	0.26799	0.310236	-1.68856	0.00371891	0.0249348	down	yes
TraesCS4D02G355900	0	0	0	0.22995	0.199282	0.180042	0.000492389	-10.9879	0.0037297	0.024986	down	yes
TraesCS1D02G425500	0.418437	0.433733	0.72696	1.31967	0.976106	1.02663	0.475296	-1.0731	0.00377142	0.0251876	down	yes
TraesCS3B02G406900	0	0	0	0.107068	0.021014	0.059662	0.00159792	-9.28959	0.00380702	0.0253678	down	yes
TraesCS4B02G269800	0.306737	0.266045	0.31924	0.72005	0.656302	0.446841	0.489264	-1.03132	0.00386921	0.0257124	down	yes
TraesCS3B02G375300	0	0	0	0.135975	0.051253	0.167459	0.000845816	-10.2074	0.00388692	0.0257977	down	yes
TraesCS1B02G288600	0	0	0	0.180867	0	0.185386	0.000819105	-10.2537	0.00389305	0.0258211	down	yes
TraesCS4B02G207000	7.46506	15.0739	6.9436	28.5215	20.4193	34.0956	0.355056	-1.49388	0.00394451	0.026084	down	yes
TraesCS7B02G259200	0.157525	0	0.140163	0.473707	0.584209	0.429307	0.200164	-2.32075	0.00398853	0.0263203	down	yes
TraesCS1B02G382700	0.283163	0.345321	0.450051	0.550282	0.874346	1.0568	0.434643	-1.2021	0.00400171	0.0263941	down	yes
TraesCS4A02G341500	0.060028	0	0.024191	0.335085	0.230428	0.146875	0.118221	-3.08045	0.00400722	0.0264195	down	yes
TraesCS5A02G500700	0	0	0.018245	0.135449	0.131738	0.170634	0.0416723	-4.58477	0.00400798	0.0264223	down	yes
TraesCS3D02G284900	0.341941	0.17738	0.415103	0.699978	0.705836	0.528706	0.483026	-1.04983	0.00413845	0.0271159	down	yes
TraesCS7D02G283900	0.943313	0.446394	0.980717	1.12125	2.22062	1.70404	0.469771	-1.08997	0.00415844	0.0272311	down	yes
TraesCS2A02G306500	0.083981	0.189659	0.262968	0.378493	0.795517	0.577881	0.306302	-1.70697	0.00416201	0.0272522	down	yes
TraesCS5B02G536100	0.135541	0.106574	0.105739	0.212499	0.38921	0.432064	0.33649	-1.57137	0.00426618	0.0278059	down	yes
TraesCS7A02G553500	0.263787	0.189257	0.201186	1.27586	0.467936	0.752331	0.262098	-1.93182	0.00431151	0.0280531	down	yes
TraesCS2A02G358100	0	0	0.073609	0.231655	0.424355	0.226867	0.083374	-3.58426	0.00432415	0.0281215	down	yes
TraesCS3D02G374700	0.187583	0.451954	0.344546	0.731766	0.952723	0.862865	0.386316	-1.37215	0.00441904	0.0286518	down	yes
TraesCS4B02G157500	0	0	0	0.102074	0.01958	0.020586	0.00210911	-8.88915	0.00443853	0.0287523	down	yes
TraesCS1A02G122600	0	0.155514	0.089025	0.554258	0.520371	0.445814	0.160834	-2.63636	0.00445849	0.0288393	down	yes
TraesCS7A02G303100	0	0	0	0.01238	0.070728	0.006152	0.00336097	-8.21691	0.00446664	0.0288685	down	yes
TraesCS1B02G445300	0.0685078	0.041884	0.023768	0.211436	0.443908	0.0704106	0.184856	-2.43553	0.00448971	0.0290011	down	yes
TraesCS7D02G372700	0.770856	1.4185	1.63216	2.78043	3.36221	1.83694	0.478911	-1.06217	0.00463148	0.0297307	down	yes
TraesCS4B02G008300	1.84967	0.650994	1.79746	3.87915	2.63814	2.75321	0.463635	-1.10894	0.0046367	0.0297595	down	yes
TraesCS7A02G278400	0.147634	0.030829	0.164006	0.437781	0.349181	0.504023	0.265277	-1.91443	0.00465762	0.0298719	down	yes
TraesCS3A02G082700	0.050087	0.070817	0.077311	0.407186	0.352782	0.180273	0.210813	-2.24596	0.00465819	0.0298731	down	yes
TraesCS2D02G082100	0.053155	0.068366	0.026664	0.154639	0.489361	0.231312	0.169294	-2.5624	0.0047882	0.0305539	down	yes
TraesCS2A02G066500	0.089311	0.037953	0.049246	0.242009	0.239322	0.297203	0.226721	-2.14101	0.00479218	0.0305768	down	yes
TraesCS6B02G244400	0	0	0	0	0.265958	0.251735	0.000579494	-10.7529	0.0048217	0.0307504	down	yes
TraesCS3D02G025000	0.040532	0.066696	0	0.189055	0.246884	0.235526	0.159693	-2.64663	0.00484007	0.0308329	down	yes
TraesCS2D02G504900	0.343341	0.135606	0.469304	0.635324	0.95176	1.17692	0.343071	-1.54342	0.00485948	0.0309268	down	yes
TraesCS2B02G029900	0.011019	0.019286	0.086614	0.222346	0.143639	0.24888	0.190154	-2.39476	0.0048945	0.0310948	down	yes
TraesCS2B02G048400	0.098381	0	0.18362	0.624055	0.548941	0.309042	0.190279	-2.39381	0.00490384	0.0311442	down	yes
TraesCS3A02G321700	0.168168	0.325733	0.132626	0.365772	0.500858	0.675775	0.406201	-1.29974	0.00498262	0.0315386	down	yes
TraesCS2B02G615900	0.511014	0.919766	0.644822	1.41752	1.41789	1.37469	0.493005	-1.02032	0.00505247	0.0319146	down	yes
TraesCS3B02G320400	0.528758	0.357539	0.463766	1.19441	0.877337	0.775282	0.4742	-1.07643	0.00509156	0.0321002	down	yes
TraesCS6D02G285600	0.414531	0.259854	0.345078	0.525833	0.814465	1.06973	0.423009	-1.24124	0.00512981	0.0322876	down	yes
TraesCS1D02G239000	1.16603	0.609841	1.49597	1.86198	2.50665	2.45625	0.479399	-1.0607	0.00516086	0.0324419	down	yes
TraesCS2B02G607600	0.025958	0.033952	0.046168	0.132222	0.121798	0.116665	0.286168	-1.80507	0.00516817	0.0324801	down	yes
TraesCSU02G103700	0.108883	0.055126	0.10262	0.205114	0.272461	0.199169	0.393988	-1.34378	0.00522677	0.0327706	down	yes
TraesCS3D02G487400	0.817197	0.825409	0.83583	1.56869	1.86824	1.54401	0.497584	-1.00699	0.00526156	0.0329549	down	yes
TraesCS4A02G304100	0.060218	0	0.17356	0.41791	0.336281	0.751711	0.155241	-2.68742	0.00535702	0.0334578	down	yes
TraesCS6B02G209600	0.263215	0	0.161362	0.493477	0.659046	1.19399	0.18094	-2.46642	0.00537319	0.0335324	down	yes
TraesCS2B02G145200	0	0	0	0.023333	0.084858	0.105856	0.00140156	-9.47875	0.00546693	0.0339998	down	yes
TraesCS7A02G552700	0.326557	0.282808	0.504578	0.757398	0.957106	0.573275	0.48691	-1.03827	0.00546848	0.0340036	down	yes
TraesCS1B02G075900	0.452589	0.262904	0.829879	0.96572	1.38871	1.38461	0.413307	-1.27471	0.00549356	0.0341227	down	yes
TraesCS5A02G468600	0.241561	0.356889	0.0870901	0.721831	0.766027	0.814202	0.297794	-1.74761	0.00550342	0.0341733	down	yes
TraesCS2D02G142000	0.149208	0.196519	0.0522078	0.47913	0.405904	0.306032	0.3341	-1.58165	0.00552974	0.0343018	down	yes
TraesCS3D02G073500	0.126696	0.203854	0.192062	0.447337	0.480891	0.316934	0.419714	-1.25252	0.00558299	0.0345438	down	yes
TraesCS7B02G060700	0.063954	0.019707	0.086032	0.26147	0.186635	0.346736	0.213493	-2.22774	0.00559595	0.0346036	down	yes
TraesCS2B02G542900	0.113207	0.088521	0.156598	0.578975	0.217434	0.298774	0.327184	-1.61183	0.00561488	0.0346918	down	yes
TraesCS1B02G038900	0.233754	0.053773	0	1.74232	0.988427	2.05247	0.0601116	-4.05621	0.00562206	0.0347227	down	yes
TraesCS3A02G488400	1.32417	0.36653	1.24252	2.19474	2.50774	2.11177	0.430454	-1.21607	0.005764	0.0353737	down	yes
TraesCS6A02G324200	0.041818	0	0.042768	0.259725	0.079081	0.362891	0.120545	-3.05236	0.00577964	0.0354615	down	yes
TraesCSU02G166400	0.17036	0.02893	0.00757	0.400451	0.118448	0.732071	0.16536	-2.59632	0.00578811	0.0354943	down	yes
TraesCS5D02G335400	0.358101	0.536007	0.686729	2.90138	1.21382	1.92946	0.261526	-1.93497	0.00580603	0.0355822	down	yes
TraesCS5B02G364700	0.262462	0.154813	0.176845	0.381109	0.425578	0.416924	0.485546	-1.04232	0.00583024	0.0356782	down	yes
TraesCS7B02G274500	0.178412	0.922628	0.192878	1.19907	1.58734	1.4212	0.307519	-1.70125	0.00593838	0.0362255	down	yes
TraesCS7D02G403500	0.436699	0.350428	0.296304	0.593401	1.08154	0.800443	0.437682	-1.19204	0.00600832	0.0365259	down	yes
TraesCS7D02G322000	0.169664	0.036094	0.134302	0.76555	0.313897	0.431488	0.225066	-2.15158	0.00607445	0.0368321	down	yes
TraesCS7B02G247200	0	0.065243	0	0.206433	0.318909	0.186761	0.0916202	-3.44819	0.00608878	0.0368964	down	yes
TraesCS5A02G348200	0	0	0	0.056952	0.085272	0.020214	0.00184686	-9.08071	0.00615043	0.0372132	down	yes
TraesCS5B02G069600	0.053134	0.029878	0	0.125902	0.329822	0.173655	0.131895	-2.92254	0.00626165	0.0377167	down	yes
TraesCS5A02G031800	0.171135	0.212723	0.265314	0.542197	0.414455	0.459518	0.4584	-1.12532	0.00628895	0.0378409	down	yes
TraesCS7A02G195600	1.08818	0.596856	1.64734	1.71709	2.65495	2.37533	0.493878	-1.01777	0.00629615	0.0378772	down	yes
TraesCS5B02G552100	0.32282	0.368818	0.387378	0.847417	0.527561	1.6692	0.354452	-1.49634	0.00629689	0.0378772	down	yes
TraesCS4A02G437600	0.467195	0.570442	0.545677	1.25645	0.701402	1.44064	0.465887	-1.10195	0.00657981	0.0392881	down	yes
TraesCS6B02G248400	0.66973	0.424843	0.766955	1.58536	0.869315	1.37112	0.486573	-1.03927	0.00664333	0.0396005	down	yes
TraesCS3D02G256600	0.268219	0.195685	0.181427	0.502977	0.591399	0.439095	0.42083	-1.24869	0.00666041	0.0396822	down	yes
TraesCS6B02G360200	0.012911	0.025882	0.030261	0.086314	0.105472	0.162647	0.194829	-2.35972	0.00668465	0.0398121	down	yes
TraesCS7B02G106500	0.269273	0.118954	0.217449	0.303882	0.70188	0.478482	0.40807	-1.29311	0.00674361	0.0400836	down	yes
TraesCS3A02G096600	0.625378	0.24004	0.634974	0.996856	1.1974	0.928239	0.48051	-1.05736	0.00681503	0.040441	down	yes
TraesCS4D02G135500	0.321904	0.239427	0.210088	0.58997	0.574719	0.448806	0.478104	-1.0646	0.00697172	0.0411939	down	yes
TraesCS6A02G111400	0.047868	0.042951	0	0.143931	0.158707	0.250998	0.164041	-2.60787	0.006974	0.0412043	down	yes
TraesCS5B02G235000	0.242469	0.232308	0.372205	0.579606	0.619282	0.742389	0.436301	-1.1966	0.00702773	0.04146	down	yes
TraesCS3B02G570800	0.086008	0	0.042123	0.250819	0.530697	0.366054	0.111654	-3.16289	0.00705703	0.041602	down	yes
TraesCS7D02G431500	0.038082	0	0	0.146923	0.061218	0.287336	0.0768593	-3.70164	0.00709794	0.0418091	down	yes
TraesCS1D02G089600	0.165428	0.04513	0.067541	0.297439	0.291099	0.425264	0.274313	-1.86611	0.00713681	0.0419882	down	yes
TraesCS2B02G098100	0	0	0	0.098333	0.021355	0.077479	0.00152155	-9.36024	0.00714037	0.0420029	down	yes
TraesCS3A02G101600	0	0	0.0716	0.416202	0.548227	0.159903	0.0636823	-3.97296	0.00714812	0.0420423	down	yes
TraesCS3B02G024000	0.14414	0.276595	0.118206	0.429179	0.476279	0.474242	0.390622	-1.35616	0.00728328	0.0427174	down	yes
TraesCS3A02G300900	0.952921	0.50523	0.926723	1.79652	1.86772	1.23874	0.486414	-1.03974	0.00733328	0.0429436	down	yes
TraesCS6A02G013600	0.462919	0.245452	0.34435	0.848445	0.758	0.605745	0.475873	-1.07135	0.00741487	0.0433511	down	yes
TraesCS4D02G099600	0.282076	0.324654	0.142645	0.592399	0.596823	0.679969	0.400909	-1.31865	0.00741874	0.0433674	down	yes
TraesCS7A02G170400	0	0	0	0.0703	0.025161	0.078674	0.0017228	-9.18103	0.00746246	0.043578	down	yes
TraesCS5D02G230700	0.034023	0.026545	0.140291	0.345428	0.323803	0.229765	0.223426	-2.16213	0.00753294	0.043925	down	yes
TraesCS5D02G304400	0.053348	0.075305	0.136848	0.346078	0.427439	0.429338	0.220726	-2.17967	0.0077592	0.0449375	down	yes
TraesCSU02G213000	0.163578	0.027778	0.007268	0.355811	0.113735	0.674848	0.173563	-2.52647	0.00776671	0.0449677	down	yes
TraesCS7A02G557300	0.110395	0.0918776	0.188265	0.457293	0.249779	0.353423	0.36826	-1.4412	0.00786043	0.0454244	down	yes
TraesCS3A02G286100	1.06322	0.485762	0.558967	1.50579	1.67406	1.17415	0.484141	-1.0465	0.00790812	0.0456559	down	yes
TraesCS2A02G026400	0	0	0	0	0.03163	0.089022	0.00248649	-8.65167	0.00807664	0.046397	down	yes
TraesCS4D02G348200	0.458503	0.346771	0.25065	0.706317	0.820867	0.645321	0.48604	-1.04085	0.00819325	0.046921	down	yes
TraesCS3B02G571200	0	0	0	0.17505	0	0.165944	0.000879781	-10.1506	0.00823675	0.0470987	down	yes
TraesCS2D02G310000	0.216203	0.0652918	0.106937	0.253637	0.41326	0.324179	0.39193	-1.35133	0.0082542	0.0471849	down	yes
TraesCS3B02G095400	0	0	0	0.241672	0	0.187077	0.00069971	-10.481	0.00825652	0.0471914	down	yes
TraesCS6B02G286100	0.033628	0	0.166248	0.169177	0.686678	0.483695	0.149211	-2.74457	0.00826768	0.0472348	down	yes
TraesCS7A02G044700	0	0	0	0.049871	0.02473	0.008053	0.00362959	-8.10598	0.00842202	0.0479304	down	yes
TraesCS1D02G418400	0.087573	0.118347	0.354691	1.10384	0.338275	0.595081	0.275188	-1.86151	0.00843956	0.0479874	down	yes
TraesCS6B02G294700	0	0	0	0.018985	0.033326	0.102271	0.00194072	-9.00919	0.00854571	0.048433	down	yes
TraesCS3B02G280100	0	0.022195	0	0.121469	0.090516	0.148048	0.0616471	-4.01982	0.00858977	0.0486411	down	yes
TraesCS1A02G144800	0.161565	0.107219	0.323657	0.50741	0.513658	0.374447	0.424532	-1.23605	0.00864986	0.0489116	down	yes
TraesCS4B02G354200	0	0	0	0.048426	0.047797	0.064522	0.00186631	-9.0656	0.00872314	0.0491999	down	yes
TraesCS5A02G539800	0.29736	0.406195	0.469434	0.780926	0.732712	1.11092	0.446928	-1.16188	0.00875216	0.0493285	down	yes
TraesCS5D02G195500	0.427719	0.722728	0.89867	1.44799	1.68538	1.09304	0.484836	-1.04443	0.00885911	0.04979	down	yes
TraesCS4A02G232700	0.227363	0.329775	0.335674	0.576458	0.495361	0.826135	0.470407	-1.08802	0.00887276	0.0498525	down	yes
TraesCSU02G008700	16.6401	19.4183	21.6223	2.31926	2.36936	2.68709	7.82037	2.96724	1.06364e-119	8.44731e-115	up	yes
TraesCS1B02G481300	41.3943	36.504	44.8819	8.24821	8.49798	8.67311	4.8302	2.27208	2.57186e-106	6.80849e-102	up	yes
TraesCS2B02G445600	40.7214	31.6193	42.0518	5.63805	4.65312	6.08071	6.98713	2.8047	4.56482e-99	9.06334e-95	up	yes
TraesCS6A02G381400	60.7055	50.7782	52.4321	10.5646	12.7548	9.95966	4.92549	2.30027	2.94186e-91	3.51034e-87	up	yes
TraesCS6D02G365700	175.547	143.802	168.571	48.4971	46.3987	48.4649	3.40344	1.76699	3.09402e-91	3.51034e-87	up	yes
TraesCS7A02G086000	16.5226	15.3244	16.8013	3.3055	2.63699	2.68235	5.64049	2.49582	7.61161e-84	6.71674e-80	up	yes
TraesCS2B02G445300	37.9418	26.5651	35.9189	5.18253	4.04915	5.35675	6.88393	2.78323	1.56278e-80	1.24115e-76	up	yes
TraesCS2D02G029600	5.65794	4.63361	6.65114	0.423295	0.506909	0.623908	10.9018	3.4465	8.62593e-78	5.70886e-74	up	yes
TraesCS7A02G187000	14.8026	14.5611	13.2448	1.4223	1.20546	1.80597	9.61008	3.26455	2.17457e-77	1.32848e-73	up	yes
TraesCS6D02G366200	65.1489	50.473	58.3523	16.1825	15.594	14.7247	3.74129	1.90354	1.25591e-76	7.1245e-73	up	yes
TraesCS6A02G274900	15.5493	9.67314	10.7724	0.991896	1.00416	0.818322	12.7896	3.6769	6.8072e-73	2.70311e-69	up	yes
TraesCS3B02G335300	14.2781	8.34487	15.6128	0.913762	0.908758	0.538785	16.1927	4.01727	6.21472e-72	2.35032e-68	up	yes
TraesCS6B02G420000	161.001	123.462	134.211	40.6953	39.9284	36.3799	3.5783	1.83927	1.28042e-69	4.4213e-66	up	yes
TraesCS4A02G110900	933.869	989.968	909.43	322.242	348.362	343.833	2.79295	1.48179	1.34712e-67	4.27947e-64	up	yes
TraesCS2A02G027800	19.8018	18.0317	24.2024	3.63845	2.972	4.31441	5.67842	2.50549	2.16998e-64	6.15491e-61	up	yes
TraesCS5D02G302800	90.1791	67.5286	82.2182	23.7475	25.0192	21.8275	3.39866	1.76497	2.85943e-64	7.83079e-61	up	yes
TraesCS2B02G445500	27.5399	23.5311	30.1213	2.80472	1.86594	3.81236	9.57116	3.25869	4.3528e-64	1.15232e-60	up	yes
TraesCS6B02G420200	68.51	52.5588	68.91	19.1223	19.8617	18.4353	3.30863	1.72623	9.55548e-63	2.44802e-59	up	yes
TraesCS2B02G445100	7.15693	6.13603	7.71456	1.32185	1.42918	1.68275	4.73806	2.2443	1.4011e-58	3.37194e-55	up	yes
TraesCS6A02G384600	70.8443	81.9939	72.3343	23.3158	21.2721	19.4625	3.51555	1.81375	5.2065e-58	1.16134e-54	up	yes
TraesCS2B02G124600	14.3365	17.7548	13.6758	2.17878	2.55989	1.83091	6.96653	2.80044	5.4105e-58	1.16134e-54	up	yes
TraesCS5B02G294600	122.826	93.0767	118.966	37.473	35.0985	35.8078	3.08978	1.62751	6.49954e-58	1.35839e-54	up	yes
TraesCS2A02G573900	145.512	160.509	133.879	40.7944	31.904	37.5188	3.9912	1.99682	1.33184e-57	2.71214e-54	up	yes
TraesCS4D02G194200	835.855	799.689	772.577	342.016	328.349	315.842	2.4418	1.28794	1.21565e-56	2.35477e-53	up	yes
TraesCS5D02G190600	17.2598	14.7039	15.2736	5.62831	5.99896	6.09042	2.66611	1.41474	1.35409e-56	2.56049e-53	up	yes
TraesCS1B02G481400	12.2309	14.8202	11.9963	2.66889	2.49673	2.7348	4.94244	2.30522	2.06708e-56	3.81781e-53	up	yes
TraesCS7B02G092300	122.19	97.2285	108.681	31.1197	30.8642	38.9096	3.25194	1.7013	1.29672e-49	2.10172e-46	up	yes
TraesCS5A02G185500	15.7102	13.9278	13.127	4.63987	5.43799	4.79677	2.87503	1.52358	7.46899e-49	1.14073e-45	up	yes
TraesCS2B02G040600	21.5309	20.9867	25.1566	7.66304	6.52164	7.14864	3.17223	1.6655	1.25635e-47	1.8826e-44	up	yes
TraesCS6B02G245100	19.2131	17.9255	22.7183	6.21598	5.58673	6.72159	3.23127	1.6921	3.80389e-47	5.39466e-44	up	yes
TraesCSU02G253900	15.9851	12.235	18.3803	3.73088	3.55689	3.49062	4.3235	2.1122	4.33166e-46	5.93131e-43	up	yes
TraesCS4B02G193200	516.03	504.427	504.873	243.375	229.758	219.058	2.20363	1.13988	4.71215e-46	6.23724e-43	up	yes
TraesCS2A02G490700	10.3877	7.78267	9.0025	2.3152	2.09574	2.34088	4.02452	2.00882	1.1316e-44	1.32163e-41	up	yes
TraesCS3B02G133400	467.027	358.652	448.194	169.571	161.816	143.806	2.68075	1.42263	3.42648e-44	3.88754e-41	up	yes
TraesCS7D02G188100	33.2724	30.2288	26.9256	7.45036	5.92573	8.3773	4.15691	2.05551	1.13419e-43	1.25105e-40	up	yes
TraesCS1D02G376300	353.317	321.683	420.998	141.733	141.732	153.378	2.50891	1.32706	1.80337e-43	1.96195e-40	up	yes
TraesCS4B02G059300	63.6625	56.3819	53.8349	19.9446	23.736	21.788	2.65592	1.40921	6.19737e-43	6.56252e-40	up	yes
TraesCS2B02G613900	61.3432	66.0023	50.6473	19.3873	18.6144	17.6335	3.19928	1.67775	3.13313e-42	3.23156e-39	up	yes
TraesCS5A02G004800	4.2945	4.13419	4.82891	0.211631	0.470696	0.194905	15.113	3.91772	4.11963e-42	4.19458e-39	up	yes
TraesCS5A02G004700	20.3728	16.2334	22.1193	5.12313	5.80978	4.06412	3.9158	1.96931	5.42287e-42	5.45163e-39	up	yes
TraesCS3A02G510900	10.4196	14.4884	10.4449	2.16992	2.04375	1.52226	6.16341	2.62373	9.06249e-42	8.99667e-39	up	yes
TraesCS2A02G588300	121.449	104.003	101.061	37.319	33.7312	43.0797	2.8609	1.51647	1.22444e-41	1.20054e-38	up	yes
TraesCS1B02G481500	8.32429	9.05611	12.206	1.73354	1.22873	1.77458	6.246	2.64293	4.09364e-41	3.91702e-38	up	yes
TraesCS4B02G220200	49.9146	55.8279	53.717	22.8904	22.7377	21.4241	2.37814	1.24984	1.61214e-40	1.50629e-37	up	yes
TraesCS6D02G197800	11.9209	11.5809	12.6939	5.25557	5.17382	5.04004	2.33982	1.2264	1.92811e-40	1.78057e-37	up	yes
TraesCS2D02G138400	2.71141	2.18774	1.97913	0.208159	0.176172	0.147052	12.9441	3.69422	2.87028e-40	2.59039e-37	up	yes
TraesCSU02G026200	35.4692	27.0483	25.1883	8.76988	8.62342	8.14155	3.43475	1.7802	2.19651e-39	1.89614e-36	up	yes
TraesCS3D02G300600	25.4354	15.3744	29.5113	4.16053	4.70669	3.01044	5.92044	2.5657	2.95491e-39	2.5234e-36	up	yes
TraesCS2B02G210600	12.2094	12.5271	11.9985	4.42551	3.49571	3.96016	3.09182	1.62845	4.12518e-38	3.18075e-35	up	yes
TraesCS2A02G107200	19.5728	16.7922	18.8853	5.7846	6.55764	4.72813	3.23662	1.69449	3.44345e-37	2.57996e-34	up	yes
TraesCS6D02G369400	33.5861	37.9467	29.3226	10.243	10.7667	7.83434	3.49658	1.80595	1.15389e-36	8.33098e-34	up	yes
TraesCS2A02G395000	5.29988	3.65271	4.55921	0.822114	0.877091	0.705091	5.61985	2.49053	1.37177e-35	9.39175e-33	up	yes
TraesCS2B02G445200	4.68379	4.49816	4.57072	0.601818	0.513574	1.01212	6.46419	2.69247	7.38046e-35	4.76544e-32	up	yes
TraesCS7D02G369400	11.6195	9.97757	13.7846	3.56372	3.23696	2.70664	3.72153	1.8959	5.32893e-34	3.13495e-31	up	yes
TraesCS5A02G295200	45.3273	37.8799	48.7368	17.2851	19.3878	14.9955	2.55367	1.35257	1.5265e-33	8.59808e-31	up	yes
TraesCS4B02G059100	69.1355	64.7461	62.3688	25.3758	31.8823	28.2998	2.29377	1.19772	2.07159e-33	1.15051e-30	up	yes
TraesCS6B02G420300	17.433	20.6145	15.3738	3.15173	4.61253	3.01016	4.95816	2.30981	5.03395e-33	2.70129e-30	up	yes
TraesCS3D02G396800	12.7427	10.0196	17.6311	2.90006	2.72819	2.18211	5.17178	2.37066	1.7427e-32	8.98726e-30	up	yes
TraesCSU02G026500	51.4249	38.9358	41.4544	18.0423	15.8577	16.991	2.59015	1.37303	1.96425e-32	1.00644e-29	up	yes
TraesCS6B02G384500	7.99613	8.7261	7.24753	3.00625	2.70488	2.63173	2.87309	1.5226	3.34469e-32	1.68121e-29	up	yes
TraesCS5A02G025300	40.1812	42.8018	32.1385	11.8883	12.1908	14.0498	3.01927	1.5942	4.0505e-32	2.02318e-29	up	yes
TraesCS3B02G421100	6.90879	4.05811	6.76931	0.844366	1.07574	0.772928	6.58596	2.71939	4.07769e-31	1.88283e-28	up	yes
TraesCS7B02G297700	11.3283	10.9474	11.0512	3.54071	4.33869	4.33265	2.72902	1.44838	5.50136e-31	2.48246e-28	up	yes
TraesCS3B02G152200	51.3148	38.8504	45.4167	19.2237	21.2356	19.1643	2.27396	1.18521	8.99456e-31	3.96855e-28	up	yes
TraesCS5A02G544400	39.9217	51.6086	30.1045	10.2487	9.59397	10.0383	4.07064	2.02526	2.78793e-30	1.19684e-27	up	yes
TraesCS6D02G243800	21.499	19.2898	18.0058	7.53662	9.24051	8.244	2.34979	1.23253	1.84099e-29	7.3472e-27	up	yes
TraesCS6D02G366000	17.8903	11.7052	13.0182	3.11764	4.03603	4.07677	3.79449	1.9239	3.36701e-29	1.27945e-26	up	yes
TraesCS6A02G380700	45.5281	32.0107	46.2694	11.1127	10.434	14.6848	3.41714	1.77279	1.16088e-28	4.34886e-26	up	yes
TraesCS5D02G062900	80.5194	73.5531	69.3175	32.1192	38.5924	34.8779	2.11565	1.0811	1.36026e-28	5.02468e-26	up	yes
TraesCS4A02G001300	3.88604	7.35804	4.26179	0.471717	0.5651	0.230642	12.2338	3.6128	4.16153e-28	1.48876e-25	up	yes
TraesCSU02G008800	29.1542	19.2749	31.8127	6.80159	5.41842	8.50902	3.87098	1.9527	5.3953e-28	1.9129e-25	up	yes
TraesCS7D02G523800	3.25093	3.97163	3.895	0.578786	0.583123	0.93244	5.30836	2.40827	1.07058e-27	3.63353e-25	up	yes
TraesCS2A02G135900	2.03414	2.32008	2.48604	0.329485	0.189407	0.322289	8.13174	3.02356	2.83356e-27	9.07413e-25	up	yes
TraesCS3A02G113900	124.258	93.9295	120.839	55.0596	56.8276	49.3334	2.10288	1.07236	7.71569e-27	2.40303e-24	up	yes
TraesCS4D02G350500	41.5516	43.5442	37.5806	19.7352	20.7752	19.9424	2.02929	1.02097	1.7157e-26	5.30191e-24	up	yes
TraesCS3D02G518200	7.73863	11.0569	10.4019	2.03129	2.79007	2.14842	4.18916	2.06666	2.02007e-26	6.17046e-24	up	yes
TraesCS2A02G058100	663.774	516.748	550.754	244.068	180.794	249.467	2.56741	1.36031	8.0049e-26	2.28684e-23	up	yes
TraesCS6A02G215500	26.448	22.4382	31.1689	10.5561	9.32298	12.2608	2.49083	1.31663	4.25323e-25	1.15681e-22	up	yes
TraesCS3D02G109600	47.4973	46.123	46.1822	23.0515	20.9024	25.7431	2.00586	1.00422	4.35654e-25	1.18086e-22	up	yes
TraesCS7D02G391400	20.7458	20.6225	21.949	10.248	9.14977	10.506	2.11737	1.08228	4.71404e-25	1.26481e-22	up	yes
TraesCS5B02G449500	4.61789	5.81231	5.1309	1.04287	1.38716	1.82693	3.65545	1.87005	7.87563e-25	2.05748e-22	up	yes
TraesCS3A02G132000	4.89353	3.9622	4.20616	1.49898	1.24144	1.33327	3.2064	1.68095	1.30707e-24	3.37034e-22	up	yes
TraesCS5B02G405300	5.38634	4.69593	3.46097	0.883426	0.993566	0.980551	4.73947	2.24472	2.85145e-24	7.0548e-22	up	yes
TraesCS5D02G012000	31.5622	19.6661	31.7037	8.15251	10.134	6.59029	3.33372	1.73713	3.14626e-24	7.6884e-22	up	yes
TraesCS6A02G271300	17.9455	15.3594	13.6555	6.78884	6.59554	7.05992	2.29699	1.19975	4.23426e-24	1.01595e-21	up	yes
TraesCS3B02G313900	36.1015	29.8479	29.9023	13.7769	16.0122	12.1501	2.28549	1.19251	5.42167e-24	1.28917e-21	up	yes
TraesCS3A02G301200	36.6408	19.8863	42.5667	9.57823	9.28971	8.11698	3.67219	1.87664	1.45646e-23	3.30487e-21	up	yes
TraesCS4A02G401700	8.63272	6.06964	8.42276	2.55655	2.69713	2.19908	3.10289	1.63361	1.47815e-23	3.34453e-21	up	yes
TraesCS2A02G027200	24.9912	21.2	26.7706	9.71939	7.77669	11.3234	2.53168	1.34009	1.72211e-23	3.88546e-21	up	yes
TraesCS4B02G106400	38.7099	32.8435	38.1596	15.57	17.0446	19.8949	2.08939	1.06308	2.46937e-23	5.50491e-21	up	yes
TraesCS1D02G034600	7.32436	7.25545	6.66639	2.55201	2.51239	1.75635	3.11493	1.6392	2.95817e-23	6.50789e-21	up	yes
TraesCS6A02G311000	17.1116	20.3727	18.4839	8.47234	7.49756	8.34311	2.30199	1.20288	3.35946e-23	7.35e-21	up	yes
TraesCS2B02G200700	14.9291	10.913	13.3719	4.99634	5.08682	5.78026	2.47197	1.30566	3.85024e-23	8.3776e-21	up	yes
TraesCS2D02G191800	12.0764	13.2832	11.7871	5.06577	5.52207	3.81901	2.57841	1.36648	1.07148e-22	2.26318e-20	up	yes
TraesCS7D02G201300	31.2324	16.8416	25.1471	5.51497	7.89994	6.09059	3.75387	1.90838	1.10505e-22	2.32174e-20	up	yes
TraesCSU02G145700	19.116	33.128	17.8501	4.30208	4.11776	6.10729	4.82505	2.27054	2.34812e-22	4.73313e-20	up	yes
TraesCS2D02G197300	8.07877	9.34097	8.68073	3.88598	3.48285	3.59201	2.38125	1.25172	2.40528e-22	4.83607e-20	up	yes
TraesCS1B02G121600	6.18787	5.89865	6.76336	2.37985	2.08999	2.8338	2.58089	1.36787	2.44776e-22	4.90906e-20	up	yes
TraesCS5B02G566100	10.8358	10.467	11.546	3.27231	4.35317	4.4291	2.72501	1.44626	2.54714e-22	5.0827e-20	up	yes
TraesCSU02G009100	15.9064	11.6769	16.3513	6.51474	5.67612	5.98406	2.41732	1.27341	2.73778e-22	5.40874e-20	up	yes
TraesCS4D02G061800	21.1757	21.6929	19.1868	9.88328	10.3067	10.8117	2.00168	1.00121	5.81647e-22	1.10512e-19	up	yes
TraesCS4A02G221500	13.7693	10.9592	13.2594	3.00153	1.55483	3.39499	4.77755	2.25627	6.33697e-22	1.19828e-19	up	yes
TraesCSU02G008900	27.0199	14.5282	30.9177	7.04281	5.54756	6.70235	3.75612	1.90924	9.015e-22	1.67673e-19	up	yes
TraesCS5D02G012300	4.27663	3.94395	5.97956	1.24837	1.57092	1.18296	3.54804	1.82702	9.1796e-22	1.69938e-19	up	yes
TraesCS6A02G351300	7.07158	9.44551	5.60874	2.10854	2.06893	2.31192	3.40954	1.76958	9.29037e-22	1.71589e-19	up	yes
TraesCS1D02G013600	6.55501	4.43956	4.32307	1.09562	1.38333	1.2951	4.05866	2.021	1.07175e-21	1.95223e-19	up	yes
TraesCS4A02G008500	11.2357	5.76764	12.5506	2.0596	2.36209	2.03688	4.57592	2.19406	1.07882e-21	1.96061e-19	up	yes
TraesCS4D02G269500	11.5468	5.88176	8.81792	1.69444	2.56786	1.66433	4.42856	2.14684	1.26653e-21	2.29126e-19	up	yes
TraesCS2A02G571300	77.9024	64.1328	72.5364	35.2718	27.8835	36.6625	2.14963	1.10409	1.53122e-21	2.75755e-19	up	yes
TraesCS3B02G065900	8.00881	9.88617	7.18501	2.84562	2.72614	2.19369	3.22969	1.69139	1.5944e-21	2.86484e-19	up	yes
TraesCS2D02G029800	10.0573	6.96997	12.8763	3.02581	2.78165	3.16127	3.3342	1.73734	2.30337e-21	4.0742e-19	up	yes
TraesCS4D02G055700	34.8748	39.3357	27.3924	12.7857	13.9116	9.8269	2.7818	1.47602	4.16261e-21	7.23393e-19	up	yes
TraesCS3D02G113300	3.67712	4.04832	3.25994	1.16294	1.19787	0.854512	3.41657	1.77255	4.49161e-21	7.77166e-19	up	yes
TraesCS5D02G031600	60.8268	72.3145	61.7172	33.5706	30.3508	32.3277	2.02452	1.01758	5.36411e-21	9.22105e-19	up	yes
TraesCS3B02G152300	19.867	18.3115	16.0026	6.62047	8.52492	6.02871	2.55884	1.35549	6.8603e-21	1.15923e-18	up	yes
TraesCS1A02G353400	43.7844	33.4932	30.4456	13.0576	11.3032	15.4254	2.70755	1.43699	8.2645e-21	1.39354e-18	up	yes
TraesCS2B02G040100	17.8402	13.8317	16.1027	7.48531	6.82537	5.95876	2.35698	1.23694	1.01386e-20	1.69873e-18	up	yes
TraesCS1B02G138100	29.1732	35.8127	26.2889	12.0445	13.4815	10.6349	2.52413	1.33579	1.03937e-20	1.73781e-18	up	yes
TraesCS6B02G423900	10.9503	15.8065	10.5537	4.33882	4.39088	3.56482	3.03472	1.60156	1.34064e-20	2.20439e-18	up	yes
TraesCS4B02G002000	5.54193	7.07979	3.46697	0.740196	0.90102	0.949723	6.2096	2.6345	2.45702e-20	3.91835e-18	up	yes
TraesCS1A02G118400	26.5563	34.2597	26.7512	12.7384	13.2231	11.5729	2.33298	1.22218	2.68705e-20	4.27661e-18	up	yes
TraesCS3A02G252300	30.8353	28.9812	34.4536	13.4661	15.3836	17.0291	2.05476	1.03897	3.76357e-20	5.90961e-18	up	yes
TraesCS7B02G134200	7.76332	8.69041	7.18364	2.90849	1.83367	2.75411	3.15322	1.65682	4.40922e-20	6.90683e-18	up	yes
TraesCS4D02G095900	19.8745	12.9009	14.1421	4.38343	4.00329	6.2137	3.21344	1.68412	4.58889e-20	7.17411e-18	up	yes
TraesCS7A02G395700	20.0779	15.008	18.2758	7.48501	7.81105	8.59723	2.23333	1.1592	5.46736e-20	8.53069e-18	up	yes
TraesCS5D02G031700	76.4865	92.0172	67.3776	36.8334	34.2336	34.6968	2.23027	1.15722	5.62251e-20	8.75557e-18	up	yes
TraesCS2A02G565400	0.964582	0.853943	0.933132	0.106177	0.128313	0.175441	6.71249	2.74685	5.86266e-20	9.09388e-18	up	yes
TraesCS1B02G065000	97.9364	75.3968	77.6475	34.3475	24.5671	38.1866	2.58473	1.37002	7.92629e-20	1.22233e-17	up	yes
TraesCS2A02G027400	1.14299	0.996156	1.099	0.020097	0	0	161.126	7.33204	1.22415e-19	1.84131e-17	up	yes
TraesCS7D02G497300	5.25805	2.91497	4.76585	0.758706	1.21164	0.734029	4.78441	2.25834	1.46945e-19	2.18543e-17	up	yes
TraesCS4B02G143500	18.726	16.0981	14.51	7.08766	5.40195	6.4656	2.60266	1.37999	3.3824e-19	4.89302e-17	up	yes
TraesCS5A02G089100	51.0857	56.0395	53.9034	21.3936	26.2524	26.8845	2.16058	1.11142	5.46265e-19	7.80284e-17	up	yes
TraesCS3A02G449400	51.3775	28.7666	54.2379	17.4584	15.7547	15.0152	2.78637	1.47839	6.56755e-19	9.29748e-17	up	yes
TraesCS5A02G004500	1.28676	0.910931	0.790436	0.049017	0.104978	0.033523	15.9352	3.99414	6.58938e-19	9.31178e-17	up	yes
TraesCS2D02G030100	3.38012	4.20986	4.30542	1.17814	1.53857	1.5839	2.76598	1.46779	6.99236e-19	9.8462e-17	up	yes
TraesCS6D02G328200	2.07256	1.55763	2.83046	0.107498	0.188219	0.373205	9.6583	3.27177	1.688e-18	2.28381e-16	up	yes
TraesCS5D02G392200	13.4044	11.634	16.7289	5.47727	4.15609	5.14915	2.82545	1.49848	2.07076e-18	2.77331e-16	up	yes
TraesCS1A02G370100	9.25351	9.95979	10.1044	4.29281	3.15495	3.85846	2.59306	1.37465	2.24705e-18	3.00435e-16	up	yes
TraesCSU02G175800	2.28726	2.07515	2.11531	0.612079	0.594017	0.67509	3.44342	1.78384	2.41263e-18	3.20952e-16	up	yes
TraesCS3B02G486100	49.5669	30.1566	46.7388	17.806	19.0481	18.6826	2.27709	1.18719	2.61922e-18	3.46693e-16	up	yes
TraesCSU02G201300	2.10741	1.83382	1.91491	0.539921	0.466647	0.523158	3.82823	1.93668	2.90145e-18	3.80248e-16	up	yes
TraesCS6B02G421900	6.89003	4.57702	6.44847	1.64085	2.1391	1.39484	3.46208	1.79164	3.43853e-18	4.46216e-16	up	yes
TraesCS2D02G057000	356.952	252.761	310.927	143.811	103.46	149.733	2.31896	1.21348	4.78253e-18	6.09669e-16	up	yes
TraesCS7B02G383900	54.5974	38.5786	60.3513	23.6966	25.8447	22.6954	2.12534	1.08769	5.05094e-18	6.42853e-16	up	yes
TraesCS2D02G029700	9.98079	8.32681	12.0267	3.319	2.42145	4.16092	3.06365	1.61525	7.83869e-18	9.81926e-16	up	yes
TraesCS6D02G334000	12.0912	17.3694	10.4563	4.74623	4.73336	5.07545	2.74247	1.45548	1.3752e-17	1.68286e-15	up	yes
TraesCS7D02G419400	12.192	7.4298	12.4958	3.4304	3.34743	3.59014	3.09776	1.63123	1.682e-17	2.04568e-15	up	yes
TraesCS6D02G260900	25.7899	24.393	20.8786	12.4882	10.4904	11.8821	2.03844	1.02747	1.97696e-17	2.38252e-15	up	yes
TraesCS2A02G183900	9.1887	11.0697	8.19396	3.94281	4.38828	4.39056	2.23653	1.16126	2.10917e-17	2.53033e-15	up	yes
TraesCS3A02G253500	3.20424	2.30224	2.48275	0.717094	0.600862	0.704577	3.95011	1.98189	2.24371e-17	2.6796e-15	up	yes
TraesCS4B02G118900	23.419	26.1136	23.4288	8.98429	11.9153	8.18836	2.5083	1.32671	2.41745e-17	2.86915e-15	up	yes
TraesCS4A02G104300	85.4137	72.0179	67.7045	26.0161	38.1734	20.7788	2.64965	1.4058	3.27919e-17	3.80745e-15	up	yes
TraesCS7A02G173000	5.25022	6.24437	4.63375	2.23755	2.44834	2.27264	2.31778	1.21274	5.0643e-17	5.76555e-15	up	yes
TraesCSU02G139100	19.2567	25.1779	17.3404	8.44173	9.26006	8.003	2.40325	1.26499	5.06724e-17	5.76555e-15	up	yes
TraesCS1A02G443900	13.0799	10.3261	10.9001	5.91891	5.5477	5.51164	2.02059	1.01478	6.50666e-17	7.30909e-15	up	yes
TraesCS7B02G105100	2.6625	2.16575	2.12628	0.357812	0.344647	0.19366	7.76072	2.95619	7.8234e-17	8.7265e-15	up	yes
TraesCS1D02G119500	23.9331	27.7832	21.0859	11.316	11.8654	9.53086	2.22553	1.15415	7.8441e-17	8.73731e-15	up	yes
TraesCSU02G009000	41.5771	30.3695	40.3618	20.9144	17.4186	16.8449	2.03539	1.0253	8.0374e-17	8.94009e-15	up	yes
TraesCS2D02G392800	3.89845	2.40449	3.30513	0.759162	0.874452	0.947294	3.72275	1.89637	8.82665e-17	9.7769e-15	up	yes
TraesCS3D02G348900	2.44971	2.4234	2.70471	0.691306	0.59853	0.749504	3.71582	1.89368	9.92724e-17	1.09502e-14	up	yes
TraesCS3A02G180000	4.15941	3.28472	4.47315	1.02219	1.53824	1.17776	3.18798	1.67264	1.03491e-16	1.13524e-14	up	yes
TraesCS1A02G342700	2.07082	3.16877	1.68274	0.320409	0.181118	0.236956	9.37372	3.22862	1.11983e-16	1.22501e-14	up	yes
TraesCS3B02G256000	7.68461	6.02871	5.60743	2.49233	1.9367	2.40948	2.82529	1.4984	1.12782e-16	1.22867e-14	up	yes
TraesCS2D02G107600	50.2015	86.3979	48.4061	9.59663	8.13266	10.3037	6.59956	2.72237	1.15854e-16	1.25697e-14	up	yes
TraesCS1A02G250000	8.38169	4.89758	6.85545	2.23687	2.15803	1.37255	3.4911	1.80368	1.34081e-16	1.439e-14	up	yes
TraesCS7B02G327400	8.37355	4.80549	9.86463	1.54493	1.08452	2.34498	4.63242	2.21176	1.48916e-16	1.58749e-14	up	yes
TraesCS1D02G344800	100.241	96.5882	99.6683	38.037	31.8525	54.3343	2.3868	1.25508	1.61102e-16	1.70702e-14	up	yes
TraesCS3B02G130000	5.91467	4.89799	4.05571	1.92314	1.34983	1.59231	3.05601	1.61165	1.6269e-16	1.72047e-14	up	yes
TraesCSU02G122100	4.0312	3.36615	3.06023	1.18971	0.987028	1.26788	3.03592	1.60213	1.92776e-16	2.02247e-14	up	yes
TraesCS3A02G260100	18.4992	15.2653	15.4453	7.77158	9.28384	7.43835	2.00907	1.00653	2.15578e-16	2.2498e-14	up	yes
TraesCS1B02G260700	1.45597	1.24736	1.61751	0.208875	0.214957	0.104784	8.17388	3.03102	2.7273e-16	2.80933e-14	up	yes
TraesCS3D02G226300	7.14147	6.56799	5.84674	2.72594	2.34723	2.89019	2.45577	1.29618	2.83091e-16	2.90852e-14	up	yes
TraesCS7D02G080700	4.4146	3.91369	4.80958	1.58018	1.19211	1.76598	2.89491	1.53352	2.83837e-16	2.91213e-14	up	yes
TraesCS3D02G449200	10.3053	7.03999	9.12194	3.84201	3.45371	3.56964	2.43593	1.28447	4.14354e-16	4.18672e-14	up	yes
TraesCS7D02G368700	10.5408	6.59323	8.44923	3.31211	2.62819	3.59409	2.68326	1.42399	4.33892e-16	4.36193e-14	up	yes
TraesCS5A02G543700	28.3323	32.2986	23.5634	7.50019	5.73658	11.2111	3.44383	1.78402	1.91435e-15	1.76376e-13	up	yes
TraesCS4D02G323500	13.0479	12.7052	10.0024	5.30109	4.71336	6.22194	2.20219	1.13894	2.2075e-15	2.00592e-13	up	yes
TraesCS2D02G197100	11.7829	8.55553	9.86486	4.75481	4.93271	5.38116	2.00438	1.00315	2.37964e-15	2.15494e-13	up	yes
TraesCS1D02G362900	1.71091	1.40481	1.54424	0.252906	0.123277	0.27605	7.14463	2.83686	2.68994e-15	2.42489e-13	up	yes
TraesCS3D02G133100	14.9562	11.3287	12.8095	5.80008	6.39981	7.15488	2.01989	1.01427	2.79114e-15	2.50757e-13	up	yes
TraesCS7D02G541300	13.6827	9.29881	10.8755	4.79195	4.17707	4.9251	2.43678	1.28498	3.37789e-15	3.01426e-13	up	yes
TraesCS4A02G091300	17.8159	23.3741	19.2395	9.38647	10.5114	10.2047	2.00746	1.00537	3.90129e-15	3.45414e-13	up	yes
TraesCS2B02G605800	6.65413	6.00447	8.13951	3.43154	3.52482	3.1348	2.06102	1.04336	4.06173e-15	3.58421e-13	up	yes
TraesCS3A02G459000	3.40784	3.68717	3.24124	0.992328	0.616659	0.942548	4.05099	2.01828	4.31521e-15	3.78267e-13	up	yes
TraesCS5B02G294500	2.52591	2.13751	3.05634	0.882003	0.666147	0.523082	3.72713	1.89807	4.75959e-15	4.13569e-13	up	yes
TraesCS3D02G254400	8.32929	5.96303	5.48526	2.07923	1.40759	2.39635	3.36172	1.7492	4.87874e-15	4.22996e-13	up	yes
TraesCS7B02G093800	4.04269	2.94353	3.671	1.56533	1.61337	1.76404	2.15614	1.10845	8.26602e-15	6.98382e-13	up	yes
TraesCS3B02G434900	7.73622	4.72649	8.03191	1.9753	2.57265	1.82265	3.21706	1.68574	9.73298e-15	8.17108e-13	up	yes
TraesCS1D02G289100	9.14945	10.5508	8.00637	3.49434	3.85138	3.84118	2.47671	1.30842	1.30135e-14	1.07658e-12	up	yes
TraesCS4B02G326800	14.663	13.1548	10.6348	6.36468	5.34899	6.53742	2.10687	1.0751	1.32416e-14	1.09431e-12	up	yes
TraesCS5D02G183700	0.956296	1.10843	1.51564	0.238462	0.270299	0.30118	4.42053	2.14422	2.60675e-14	2.06201e-12	up	yes
TraesCS2D02G497300	7.12044	5.34147	6.03142	1.65701	2.57033	1.3646	3.30713	1.72558	2.61973e-14	2.07021e-12	up	yes
TraesCS4D02G300500	26.7337	15.1155	22.9138	8.39622	5.89102	9.43835	2.72967	1.44873	2.6439e-14	2.08723e-12	up	yes
TraesCS2A02G013200	8.08209	6.33912	8.72036	3.87943	3.22592	3.92896	2.09724	1.06849	2.8722e-14	2.25849e-12	up	yes
TraesCS2B02G159800	1.66327	1.12487	1.81543	0.30792	0.429184	0.240068	4.71112	2.23607	4.41509e-14	3.38784e-12	up	yes
TraesCS2A02G483300	0.472125	0.355213	0.42798	0.09477	0.067285	0.082234	5.13866	2.36139	6.6989e-14	5.02854e-12	up	yes
TraesCS3D02G148300	8.55202	6.33742	8.26841	3.73687	2.39265	3.37764	2.43583	1.28441	9.44136e-14	6.95569e-12	up	yes
TraesCS6A02G381300	57.853	36.342	60.2208	21.9799	24.8195	17.9558	2.38461	1.25375	1.02091e-13	7.48661e-12	up	yes
TraesCS3B02G556500	2.73269	2.02104	2.62073	1.01773	0.830325	0.827711	2.75602	1.46259	1.07483e-13	7.84577e-12	up	yes
TraesCS5D02G148900	4.22175	3.23677	3.20177	1.33538	1.44528	1.31406	2.60343	1.38041	1.23448e-13	8.93724e-12	up	yes
TraesCS3A02G280000	15.2275	11.0726	12.575	6.81173	6.72997	5.24627	2.06915	1.04904	1.39439e-13	1.00128e-11	up	yes
TraesCS2D02G107400	2.97975	3.05352	1.94016	0.568985	0.670297	0.777438	3.95367	1.98319	1.91614e-13	1.3551e-11	up	yes
TraesCS1B02G478400	13.8888	10.2184	10.2586	5.88753	5.03772	5.64318	2.07417	1.05254	2.53371e-13	1.7605e-11	up	yes
TraesCS2A02G507800	7.77114	9.64227	7.85097	3.91762	3.83891	4.21038	2.11119	1.07805	2.80137e-13	1.94307e-11	up	yes
TraesCS3A02G401900	9.41857	5.57066	11.7203	2.94129	3.03584	2.042	3.33073	1.73584	2.85357e-13	1.97755e-11	up	yes
TraesCS7D02G215000	9.1137	10.3403	8.12769	4.55543	3.91398	5.13788	2.02698	1.01933	4.22895e-13	2.85352e-11	up	yes
TraesCS6A02G240700	16.8618	10.7656	19.9247	4.63114	6.90679	5.60107	2.7745	1.47223	4.42454e-13	2.97538e-11	up	yes
TraesCS7A02G501400	3.2308	2.68382	3.79337	1.39583	1.55348	1.09685	2.39931	1.26262	5.02028e-13	3.35893e-11	up	yes
TraesCS4B02G302200	23.8922	13.7718	22.9064	7.19752	7.18492	10.1801	2.46597	1.30215	5.39446e-13	3.60322e-11	up	yes
TraesCS5A02G400500	1.76299	1.30318	1.93469	0.416173	0.252028	0.40118	4.6764	2.2254	7.07726e-13	4.65595e-11	up	yes
TraesCS4A02G025300	5.00022	7.39898	4.32432	2.21435	1.41434	1.73909	3.11554	1.63948	8.19062e-13	5.37596e-11	up	yes
TraesCS5D02G403700	5.53623	3.85623	5.05921	2.34644	2.04114	1.87694	2.30691	1.20596	8.53706e-13	5.58949e-11	up	yes
TraesCS3A02G140900	7.35808	6.63126	7.10513	3.22497	2.52318	3.51576	2.27706	1.18717	9.27056e-13	6.02996e-11	up	yes
TraesCS2D02G374500	7.04589	4.28252	5.27625	2.59123	2.01572	2.02725	2.50289	1.32359	9.91124e-13	6.41517e-11	up	yes
TraesCS2B02G445400	1.86247	1.64825	1.79513	0.421545	0.224065	0.547027	4.44884	2.15343	1.01e-12	6.52137e-11	up	yes
TraesCSU02G253400	4.75066	5.98875	3.69498	0.845754	0.402278	1.3186	5.62387	2.49156	1.60134e-12	1.00694e-10	up	yes
TraesCS5A02G544200	10.374	14.343	6.5027	1.39614	0.653294	2.43734	6.95815	2.7987	1.69802e-12	1.06185e-10	up	yes
TraesCS3D02G106600	0.915326	0.650517	1.06831	0.148203	0.176745	0.137008	5.70217	2.51151	1.76517e-12	1.10038e-10	up	yes
TraesCS2D02G379000	4.99547	5.80026	4.98586	1.9117	2.66446	1.70212	2.51368	1.3298	1.85255e-12	1.15214e-10	up	yes
TraesCS5A02G544100	9.24241	12.4221	5.65414	1.48917	0.625144	2.02224	6.60421	2.72339	2.64008e-12	1.59205e-10	up	yes
TraesCS4B02G053700	2.02766	2.85514	2.29654	0.776195	0.808877	0.936622	2.84703	1.50946	3.10905e-12	1.84957e-10	up	yes
TraesCS6A02G260900	3.74526	1.99845	5.57565	0.757379	0.781013	0.264447	6.27863	2.65045	3.33153e-12	1.96719e-10	up	yes
TraesCS7D02G451800	219.701	291.898	184.665	125.871	106.155	109.365	2.0395	1.02822	3.62023e-12	2.12558e-10	up	yes
TraesCS2D02G030000	8.37208	5.7712	11.082	2.96873	2.09169	3.61383	2.90806	1.54006	3.79682e-12	2.22703e-10	up	yes
TraesCS3D02G126300	13.5624	8.75488	12.8682	5.02036	6.57499	4.79475	2.14675	1.10216	3.84147e-12	2.25155e-10	up	yes
TraesCS6B02G449500	1.05644	0.988882	0.967933	0.400623	0.367089	0.374652	2.63773	1.3993	5.44013e-12	3.13079e-10	up	yes
TraesCS7D02G251900	4.94582	3.59235	4.19928	1.6848	1.68845	1.66625	2.52752	1.33772	5.97209e-12	3.41959e-10	up	yes
TraesCS7D02G108900	4.24503	3.90469	3.56072	1.63747	1.85425	1.25458	2.46728	1.30292	7.66127e-12	4.31831e-10	up	yes
TraesCS1B02G368400	26.6499	16.0074	22.059	10.1315	8.53287	11.354	2.15589	1.10828	7.75605e-12	4.36864e-10	up	yes
TraesCS4B02G099700	9.31417	9.08536	6.95597	3.05121	2.72052	4.2647	2.52635	1.33705	8.3826e-12	4.67841e-10	up	yes
TraesCS4B02G237600	2.42048	2.57133	1.6186	0.586237	0.429841	0.211617	5.3844	2.42879	1.02569e-11	5.63734e-10	up	yes
TraesCS3B02G510100	5.67597	4.65203	7.02734	2.83929	2.64508	2.83602	2.08588	1.06066	1.09382e-11	5.99105e-10	up	yes
TraesCS2D02G127000	32.0307	14.8655	38.7588	10.0225	10.3023	8.95798	2.9251	1.54849	1.22956e-11	6.67925e-10	up	yes
TraesCS2B02G124400	5.02355	9.29857	7.78564	1.89637	1.51646	1.14189	4.85381	2.27912	1.28214e-11	6.95533e-10	up	yes
TraesCS4B02G384000	1.47882	0.722396	0.905429	0.075203	0.104402	0.177193	8.70702	3.12218	1.35431e-11	7.33686e-10	up	yes
TraesCS3B02G339300	1.55764	1.56024	1.57314	0.511444	0.410385	0.252727	3.99387	1.99779	1.70306e-11	9.11879e-10	up	yes
TraesCS2D02G029900	5.26223	2.82512	7.8544	1.40522	0.851134	1.62342	4.10894	2.03877	1.76706e-11	9.4313e-10	up	yes
TraesCS2D02G073900	5.78027	3.52522	5.11937	2.02987	1.57361	2.36608	2.4164	1.27286	1.90702e-11	1.01375e-09	up	yes
TraesCS3A02G455900	11.8697	15.169	8.013	3.54193	2.06847	4.40342	3.50033	1.80749	2.23479e-11	1.1793e-09	up	yes
TraesCS2D02G107500	9.15641	9.4719	9.38476	2.72128	2.21266	4.79495	2.87937	1.52575	2.74937e-11	1.42994e-09	up	yes
TraesCS5B02G023400	18.489	27.2305	13.5786	7.68532	7.48071	7.3465	2.634	1.39726	2.83002e-11	1.469e-09	up	yes
TraesCS7B02G136400	1.7248	2.26392	1.63282	0.634852	0.762628	0.538651	2.90349	1.53779	3.01786e-11	1.56344e-09	up	yes
TraesCS2A02G026800	6.28532	4.42766	4.92277	2.30545	2.47772	1.81106	2.37113	1.24557	3.07113e-11	1.58793e-09	up	yes
TraesCS7D02G133400	0.845543	0.845031	1.86075	0.107093	0.080554	0.152909	10.428	3.38239	3.94131e-11	1.99754e-09	up	yes
TraesCS2A02G288000	10.8621	9.38142	7.36127	4.67919	4.38032	3.85218	2.13797	1.09624	4.0967e-11	2.07101e-09	up	yes
TraesCS3B02G475100	15.74	8.84839	15.1198	6.04023	5.52373	5.81262	2.28516	1.19229	4.36341e-11	2.19605e-09	up	yes
TraesCS4D02G200700	76.3242	52.0154	59.5219	28.4619	37.8354	21.0802	2.15	1.10434	4.83246e-11	2.42444e-09	up	yes
TraesCS3B02G159700	1.85961	1.41084	1.66829	0.577885	0.518828	0.34654	3.42195	1.77482	5.16122e-11	2.57474e-09	up	yes
TraesCS4D02G295900	6.87408	4.7978	6.10887	3.22035	2.79567	2.73511	2.03182	1.02278	5.20685e-11	2.59587e-09	up	yes
TraesCS4D02G053700	1.54592	1.68563	1.48774	0.573408	0.423925	0.518795	3.11272	1.63818	5.29055e-11	2.631e-09	up	yes
TraesCS1B02G356200	3.40759	3.15145	3.19516	1.27085	1.66911	1.88943	2.01975	1.01418	5.34223e-11	2.65503e-09	up	yes
TraesCS4A02G336600	3.12414	3.40625	2.79822	1.32189	1.55458	1.46627	2.14809	1.10305	6.2687e-11	3.07697e-09	up	yes
TraesCS5A02G545400	4.53227	4.57774	2.28256	0.609535	0.403977	0.684113	6.71089	2.7465	7.46319e-11	3.60974e-09	up	yes
TraesCS6D02G166900	1.59685	1.39709	2.06352	0.600167	0.711028	0.622973	2.6148	1.3867	9.86498e-11	4.68021e-09	up	yes
TraesCS1B02G368300	12.8283	4.84379	9.96409	3.1929	1.91985	2.92501	3.4383	1.78169	1.10545e-10	5.21033e-09	up	yes
TraesCS1D02G345400	8.85284	7.45358	6.62199	3.73546	3.17815	4.25211	2.05346	1.03806	1.16375e-10	5.45916e-09	up	yes
TraesCS3D02G227100	4.77517	6.16819	4.36181	2.30393	2.10188	2.01574	2.38341	1.25303	1.29094e-10	6.01321e-09	up	yes
TraesCS3A02G315800	3.33607	2.80002	3.22619	1.46642	1.37684	1.7368	2.04414	1.03149	1.29626e-10	6.03445e-09	up	yes
TraesCS2B02G493300	0.544737	0.679376	0.499086	0.065789	0.022063	0.038699	13.6166	3.7673	1.40798e-10	6.51254e-09	up	yes
TraesCS2D02G296100	1.82178	1.17781	2.07635	0.557846	0.430678	0.48845	3.43672	1.78103	1.56759e-10	7.19633e-09	up	yes
TraesCS6D02G367100	3.89098	5.04353	4.32539	1.71428	2.22253	1.28194	2.54082	1.34529	2.13651e-10	9.67386e-09	up	yes
TraesCS5B02G079100	9.34352	9.23698	6.41653	4.23421	3.91594	3.93505	2.0684	1.04852	2.42349e-10	1.08741e-08	up	yes
TraesCS2B02G518900	2.31737	1.82555	2.14037	0.901991	0.611844	0.700924	2.83701	1.50437	2.56485e-10	1.1463e-08	up	yes
TraesCS3B02G310500	6.07299	6.29811	4.71942	2.82789	2.47827	2.99367	2.05914	1.04204	3.40247e-10	1.49211e-08	up	yes
TraesCS1D02G232700	3.91148	3.62331	3.81247	1.2592	1.36796	2.12252	2.38906	1.25644	3.48099e-10	1.52402e-08	up	yes
TraesCS4B02G172700	2.33244	2.21353	2.15418	1.12183	0.897419	0.952011	2.25498	1.17312	3.5182e-10	1.53946e-08	up	yes
TraesCS1B02G041400	2.97766	2.91947	2.99852	1.21919	1.6944	1.31509	2.10365	1.07289	3.57348e-10	1.56107e-08	up	yes
TraesCS3A02G228600	6.51398	5.18924	4.24611	2.59864	1.94091	2.24593	2.35051	1.23297	3.58827e-10	1.56667e-08	up	yes
TraesCS1B02G472700	3.27263	2.53174	2.65842	0.690118	1.08322	0.676382	3.4546	1.78852	4.08518e-10	1.77e-08	up	yes
TraesCS3D02G451400	5.39794	4.57141	2.98082	1.18784	1.89081	1.1622	3.05366	1.61054	5.66064e-10	2.40794e-08	up	yes
TraesCS5D02G441500	9.91569	6.78776	9.43981	4.36813	4.60053	2.78789	2.22372	1.15297	5.89661e-10	2.49628e-08	up	yes
TraesCS2B02G446100	0.569341	0.294484	0.588063	0.077217	0.085156	0.081426	5.95527	2.57417	6.11569e-10	2.58215e-08	up	yes
TraesCS5A02G373100	2.94578	3.10398	2.58208	1.50068	1.28198	1.24961	2.1407	1.09808	7.4834e-10	3.12802e-08	up	yes
TraesCS1A02G356900	2.86605	2.14571	3.07982	1.25466	1.00571	1.10044	2.40762	1.26761	9.76179e-10	4.0045e-08	up	yes
TraesCS5B02G499000	0.061068	0.087225	0.158673	0	0	0	1023.22	9.9989	1.01488e-09	4.15039e-08	up	yes
TraesCS2B02G314500	1.25376	0.63477	1.10935	0.242022	0.106513	0.118379	6.42062	2.68271	1.16924e-09	4.70892e-08	up	yes
TraesCS3A02G006600	7.69013	6.28285	8.22645	4.01228	2.78325	2.44745	2.40176	1.26409	1.25615e-09	5.03086e-08	up	yes
TraesCS4D02G201700	0.534366	0.300138	0.25519	0.038021	0.060507	0.042992	7.69993	2.94485	1.48114e-09	5.86978e-08	up	yes
TraesCS1D02G198500	7.04794	4.33286	6.41448	3.16199	2.54655	2.81162	2.08861	1.06254	2.04293e-09	7.89527e-08	up	yes
TraesCSU02G246000	9.34877	4.95114	8.98178	3.09488	2.65399	3.67524	2.47044	1.30477	2.13822e-09	8.24345e-08	up	yes
TraesCS3D02G351900	0.287548	1.39611	0.431927	0.083658	0.060027	0.059373	10.4186	3.38109	2.18648e-09	8.41318e-08	up	yes
TraesCSU02G222000	2.77883	3.71965	1.90904	0.553518	0.289763	0.692549	5.47425	2.45266	2.32174e-09	8.90342e-08	up	yes
TraesCS3B02G144800	14.0015	8.83369	11.0553	4.9862	7.01532	4.6813	2.03146	1.02252	2.73297e-09	1.03455e-07	up	yes
TraesCS1B02G373100	2.07595	1.79421	2.20175	0.619805	0.876195	0.887217	2.54778	1.34924	3.45701e-09	1.28355e-07	up	yes
TraesCS6A02G373300	3.11511	1.4994	4.64568	0.354218	0.911163	0.415584	5.50886	2.46175	3.51288e-09	1.30126e-07	up	yes
TraesCS7A02G240800	0.817091	0.687969	0.718324	0.235204	0.107706	0.121636	4.78614	2.25886	4.14192e-09	1.51728e-07	up	yes
TraesCS7D02G425700	0.382443	0.370247	0.252826	0.063846	0.042218	0.07882	5.43863	2.44324	4.455e-09	1.62225e-07	up	yes
TraesCS5B02G531800	0.660082	0.714151	0.705897	0.043204	0	0.0632	19.5494	4.28905	4.62008e-09	1.67545e-07	up	yes
TraesCS3B02G549200	0.519466	0.45238	0.837899	0.057281	0.054178	0.145752	7.03603	2.81476	5.74885e-09	2.06032e-07	up	yes
TraesCS2B02G626400	0.378677	0.275207	0.423065	0.0522495	0.0557008	0.0672912	6.14551	2.61953	6.30808e-09	2.24253e-07	up	yes
TraesCS1B02G064600	47.229	28.6833	49.5033	22.1371	13.9278	22.3059	2.1486	1.1034	6.38691e-09	2.2665e-07	up	yes
TraesCS1A02G033200	1.90292	1.57757	1.56509	0.402455	0.791544	0.41509	3.13567	1.64877	7.81865e-09	2.72825e-07	up	yes
TraesCSU02G205900	0.735155	1.02577	0.770861	0.216145	0.119788	0.172282	4.98173	2.31665	7.85283e-09	2.73897e-07	up	yes
TraesCS6A02G059700	2.76419	1.97091	2.20636	1.06479	0.66162	0.912673	2.63026	1.3952	7.92248e-09	2.76084e-07	up	yes
TraesCS5A02G365000	2.62896	2.48793	1.7352	0.900667	0.802856	0.560008	3.02716	1.59797	8.10486e-09	2.81821e-07	up	yes
TraesCS3B02G122900	0.224858	0.255953	0.262957	0	0	0	2479.23	11.2757	8.68135e-09	2.99637e-07	up	yes
TraesCS2D02G181300	3.95584	1.80674	4.75497	0.843982	1.3419	0.754243	3.57725	1.83885	8.73909e-09	3.01237e-07	up	yes
TraesCSU02G238600	3.46547	4.70008	2.30202	0.654178	0.373945	0.830923	5.63061	2.49329	1.12788e-08	3.80846e-07	up	yes
TraesCS2A02G348400	0	0.677868	0	0	0	0	2259.56	11.1418	1.24847e-08	4.18541e-07	up	yes
TraesCS1B02G260600	1.93595	0.776425	1.38651	0.314741	0.260043	0.114438	5.94711	2.57219	1.38661e-08	4.61154e-07	up	yes
TraesCS2B02G135100	0.893784	1.01183	0.704577	0.231003	0.262658	0.294699	3.31091	1.72723	1.86479e-08	6.03504e-07	up	yes
TraesCS1A02G070200	3.30715	2.29192	3.40123	1.0413	0.53581	1.27658	3.15392	1.65714	1.92106e-08	6.18941e-07	up	yes
TraesCS3D02G015900	0.133801	0.306009	0.24404	0	0	0	2279.5	11.1545	2.0416e-08	6.52744e-07	up	yes
TraesCS5A02G433200	2.98328	1.43793	3.26254	0.924642	0.932537	0.852781	2.83537	1.50354	2.23469e-08	7.09624e-07	up	yes
TraesCS3A02G255600	1.37129	1.03793	1.44919	0.414909	0.514611	0.340654	3.03769	1.60298	2.24238e-08	7.11495e-07	up	yes
TraesCS7D02G497800	1.77856	1.03777	1.60455	0.552153	0.355492	0.237028	3.86213	1.9494	2.46084e-08	7.74315e-07	up	yes
TraesCS2A02G040700	127.824	80.5672	92.9988	27.1086	20.4743	39.9967	3.44133	1.78297	2.56291e-08	8.02618e-07	up	yes
TraesCS4B02G014000	2.90563	1.09495	2.27173	0.396731	0.451251	0.775526	3.86343	1.94988	2.69907e-08	8.41277e-07	up	yes
TraesCS4D02G300400	0.844695	0.394605	0.750852	0.108187	0.090085	0.127983	6.09999	2.60881	3.1021e-08	9.55868e-07	up	yes
TraesCS7D02G244800	0.880465	0.953028	1.00463	0.405503	0.441529	0.421176	2.2379	1.16215	3.24167e-08	9.94785e-07	up	yes
TraesCS3A02G355000	6.97981	5.85387	5.42502	1.44743	1.48918	3.23223	2.95983	1.56551	4.4361e-08	1.32797e-06	up	yes
TraesCS7A02G246200	0.672567	0.508928	0.450328	0.080348	0.134418	0.178465	4.14978	2.05304	4.84719e-08	1.44018e-06	up	yes
TraesCS7D02G227900	1.14872	0.877368	1.14697	0.413656	0.313315	0.530674	2.52302	1.33515	4.86719e-08	1.44558e-06	up	yes
TraesCS1D02G249600	8.89973	4.54868	10.2731	3.69219	3.26568	2.28521	2.56641	1.35975	4.87417e-08	1.44711e-06	up	yes
TraesCS2B02G595000	11.4078	18.8296	8.83939	2.33622	1.26291	2.96747	5.95084	2.57309	4.98383e-08	1.47635e-06	up	yes
TraesCS7A02G509000	3.52255	1.6498	3.24001	0.644808	1.28602	0.682158	3.21944	1.68681	5.4866e-08	1.61505e-06	up	yes
TraesCS3D02G286900	13.612	26.0976	11.7082	7.24468	7.16766	6.57241	2.45024	1.29292	5.85271e-08	1.70951e-06	up	yes
TraesCS2D02G028900	2.35937	1.6149	1.58183	0.680661	0.535975	0.284923	3.70022	1.88761	6.11782e-08	1.77692e-06	up	yes
TraesCS5A02G304100	10.4057	6.19139	8.19749	4.71278	2.8702	3.95075	2.14975	1.10417	7.16635e-08	2.05467e-06	up	yes
TraesCS6A02G334200	0	0.68852	0	0	0	0	2295.07	11.1643	7.27152e-08	2.08257e-06	up	yes
TraesCS2B02G053200	216.502	151.337	139.466	53.3481	35.2879	69.1483	3.21518	1.6849	8.07489e-08	2.29939e-06	up	yes
TraesCS1D02G377000	6.81126	7.79404	4.50682	3.31977	2.61498	3.18833	2.09492	1.06689	8.51326e-08	2.41297e-06	up	yes
TraesCS5D02G038800	0.643364	0.950637	0.668151	0.176162	0.27232	0.234747	3.31097	1.72725	8.70061e-08	2.4608e-06	up	yes
TraesCSU02G137300	1.26168	0.76097	1.6493	0.285038	0.273654	0.412131	3.78231	1.91927	8.75348e-08	2.47399e-06	up	yes
TraesCS7D02G190100	1.13767	0.97965	1.05773	0.539654	0.305977	0.365872	2.62075	1.38998	8.91977e-08	2.51562e-06	up	yes
TraesCS7D02G050500	0.071781	0.595146	0.227098	0	0	0	2980.08	11.5411	8.96464e-08	2.52738e-06	up	yes
TraesCS3A02G055800	2.0236	2.66816	1.7003	0.871362	1.11947	0.921511	2.19481	1.1341	9.43596e-08	2.64897e-06	up	yes
TraesCS5D02G410700	2.67067	1.5087	2.39603	0.755853	0.601516	0.922849	2.88367	1.52791	9.46494e-08	2.6555e-06	up	yes
TraesCS5A02G261400	0.885391	0.532613	1.20222	0.201572	0.250573	0.126738	4.52634	2.17835	9.78497e-08	2.73535e-06	up	yes
TraesCSU02G161300	3.70405	4.62499	4.883	1.36496	1.30395	1.76953	2.97673	1.57373	1.05957e-07	2.94538e-06	up	yes
TraesCS3A02G459200	8.33048	11.5706	5.48255	3.89311	3.52984	3.76358	2.26913	1.18214	1.06929e-07	2.96619e-06	up	yes
TraesCS5B02G375100	2.94003	1.50067	2.60575	0.739308	0.997988	0.649527	2.95223	1.5618	1.10335e-07	3.05003e-06	up	yes
TraesCS1A02G413400	0.944509	0.784933	1.13059	0.30562	0.282824	0.187677	3.68503	1.88168	1.11405e-07	3.07106e-06	up	yes
TraesCS4A02G385300	1.13857	0.815417	0.771481	0.144242	0.164638	0.323204	4.31188	2.10832	1.17685e-07	3.22958e-06	up	yes
TraesCS5A02G004600	0.547411	0.48526	0.518267	0.096022	0.062641	0.133079	5.31613	2.41038	1.40949e-07	3.80621e-06	up	yes
TraesCS3D02G352400	0.23221	1.54369	0.403008	0.102488	0.076613	0.048815	9.56014	3.25703	1.56502e-07	4.18718e-06	up	yes
TraesCS3A02G125200	2.92918	1.6908	2.42873	1.13256	0.95779	1.01655	2.26873	1.18189	1.59832e-07	4.26591e-06	up	yes
TraesCSU02G271000	14.9986	9.71088	17.9637	4.61039	5.0571	6.12102	2.7028	1.43445	1.79347e-07	4.73523e-06	up	yes
TraesCS1D02G032800	6.2221	8.32493	5.01615	2.81347	3.604	3.15176	2.04438	1.03166	1.87816e-07	4.92606e-06	up	yes
TraesCS7B02G253600	2.74465	2.14652	3.7641	1.17833	1.55497	0.957974	2.34479	1.22946	2.15433e-07	5.56586e-06	up	yes
TraesCS2D02G195900	1.33472	0.574849	1.2816	0.291299	0.314062	0.166986	4.13179	2.04677	2.17113e-07	5.6038e-06	up	yes
TraesCS4A02G103400	0.513819	0.314875	0.288083	0.055998	0	0.03438	12.3567	3.62723	2.52184e-07	6.41106e-06	up	yes
TraesCS1B02G481600	22.5588	27.3076	18.5181	9.67165	8.19312	13.1074	2.20793	1.1427	2.98477e-07	7.45667e-06	up	yes
TraesCS4B02G270200	6.33469	2.98682	5.64892	1.26718	2.72554	1.02171	2.98547	1.57796	3.43968e-07	8.45746e-06	up	yes
TraesCS3B02G321600	6.62892	7.86773	4.17265	2.90363	2.71852	2.51876	2.29327	1.19741	3.49365e-07	8.57954e-06	up	yes
TraesCS2A02G132600	1.90999	2.01191	1.90504	0.519985	0.796681	0.99693	2.51856	1.3326	3.60238e-07	8.79759e-06	up	yes
TraesCS2A02G124200	24.3223	9.87998	25.0718	7.26842	10.4908	6.41919	2.45153	1.29368	3.68642e-07	8.97522e-06	up	yes
TraesCS2D02G039300	77.7418	45.1312	50.4613	13.1246	7.33259	19.054	4.38697	2.13323	3.75476e-07	9.11645e-06	up	yes
TraesCS3A02G428100	1.83422	1.48822	2.07707	0.79494	0.386849	0.632304	2.97643	1.57358	4.73417e-07	1.12469e-05	up	yes
TraesCS1B02G096600	0.54086	0.521733	0.386896	0.061929	0	0.044583	13.6087	3.76646	5.01669e-07	1.18366e-05	up	yes
TraesCS4D02G078400	1.96606	2.25405	2.02311	0.688911	0.794635	0.733268	2.8163	1.4938	5.13814e-07	1.20801e-05	up	yes
TraesCS3A02G412500	0.354124	0.251727	0.131994	0	0	0	2459.48	11.2641	5.55648e-07	1.29677e-05	up	yes
TraesCS2A02G040500	132.403	93.3288	85.4942	32.4047	19.1771	42.4809	3.30871	1.72627	6.24828e-07	1.44156e-05	up	yes
TraesCS2B02G400000	4.01275	3.61017	4.09869	2.27792	2.19586	1.30884	2.02704	1.01937	6.54833e-07	1.49787e-05	up	yes
TraesCS1A02G203600	3.12315	1.8834	2.80471	1.2158	1.15438	0.872551	2.40885	1.26834	6.59022e-07	1.50572e-05	up	yes
TraesCS7A02G427100	2.57794	1.22001	2.93944	0.864139	0.391532	0.625351	3.58177	1.84067	6.59813e-07	1.50709e-05	up	yes
TraesCS2D02G105100	1.02418	0.932371	0.816856	0.158937	0.206992	0.437332	3.45268	1.78772	6.70034e-07	1.5278e-05	up	yes
TraesCS7B02G077800	1.04063	0.919718	0.881808	0.443549	0.469674	0.440925	2.09885	1.0696	7.91153e-07	1.77744e-05	up	yes
TraesCS3A02G151300	2.56318	2.88602	1.83453	0.943596	0.725616	1.43091	2.3495	1.23235	8.01987e-07	1.79647e-05	up	yes
TraesCS3B02G144500	3.60223	2.21326	4.61847	1.12736	0.871682	0.766777	3.77246	1.91551	8.52696e-07	1.89427e-05	up	yes
TraesCS6B02G411000	2.18648	0.867733	1.78387	0.264205	0.499225	0.352841	4.33414	2.11575	8.65554e-07	1.92069e-05	up	yes
TraesCS4D02G235200	1.97545	1.43014	1.26103	0.557932	0.801937	0.708542	2.25614	1.17386	9.55102e-07	2.09945e-05	up	yes
TraesCS6D02G290400	2.023	4.66034	1.57284	0.923181	0.359057	0.831453	3.90605	1.96571	9.65444e-07	2.11984e-05	up	yes
TraesCS5D02G003800	3.68624	2.05387	3.87326	1.19351	1.55183	1.11346	2.49129	1.31689	1.0468e-06	2.28457e-05	up	yes
TraesCS2D02G210300	18.5833	10.9371	30.9168	5.56143	5.84101	8.89499	2.97758	1.57414	1.06641e-06	2.32037e-05	up	yes
TraesCS3A02G408400	0.692521	0.770226	0.537483	0.14224	0.058319	0.152349	5.66785	2.5028	1.07032e-06	2.32759e-05	up	yes
TraesCS2D02G134700	3.16072	3.12156	3.58377	1.709	0.743732	1.55102	2.4642	1.30112	1.11788e-06	2.42241e-05	up	yes
TraesCS2B02G412900	1.29082	0.424655	0.946152	0.22307	0.286121	0.164609	3.95017	1.98192	1.19355e-06	2.57444e-05	up	yes
TraesCS6D02G222900	16.0211	8.65307	21.872	6.57285	5.1393	7.33165	2.44416	1.28934	1.28362e-06	2.74634e-05	up	yes
TraesCSU02G145600	12.4487	21.0815	8.83962	5.90426	4.97919	6.56966	2.42763	1.27955	1.29599e-06	2.76623e-05	up	yes
TraesCS6D02G116900	0.581523	0.628129	0.508942	0.105957	0.024095	0.153674	6.05723	2.59866	1.34571e-06	2.85838e-05	up	yes
TraesCS7A02G256900	1.95388	2.02846	2.95852	0.957314	0.822434	0.976885	2.51787	1.3322	1.36778e-06	2.89906e-05	up	yes
TraesCS4D02G231500	1.2493	1.19297	1.15083	0.539008	0.584136	0.475168	2.24806	1.16868	1.42975e-06	3.01592e-05	up	yes
TraesCS2B02G413000	0.933114	0.682057	1.0622	0.232317	0.29584	0.131562	4.05835	2.02089	1.52158e-06	3.18174e-05	up	yes
TraesCS3B02G549000	0.542077	0.188015	0.758808	0.016299	0.024076	0.107909	10.0409	3.32781	1.53215e-06	3.20131e-05	up	yes
TraesCS3B02G383900	0.607922	0.625597	0.544292	0.153161	0.062454	0.129327	5.15394	2.36568	1.77616e-06	3.64592e-05	up	yes
TraesCS5A02G337800	2.54544	1.42738	1.99663	0.558035	0.891929	0.965648	2.4712	1.30521	1.90328e-06	3.87581e-05	up	yes
TraesCS5A02G133100	3.93761	4.52294	4.36137	1.68053	1.46321	2.09353	2.44821	1.29172	2.023e-06	4.0892e-05	up	yes
TraesCS2A02G482300	2.6907	2.55058	2.70767	0.833129	0.956305	0.21394	3.96778	1.98833	2.18684e-06	4.38246e-05	up	yes
TraesCS2A02G298000	2.01989	1.16043	2.49174	0.727588	0.711483	0.843438	2.48501	1.31325	2.18858e-06	4.38483e-05	up	yes
TraesCS4B02G067300	4.4045	8.02823	5.29585	2.94446	2.29971	3.16325	2.10868	1.07634	2.20815e-06	4.41736e-05	up	yes
TraesCS7B02G004800	2.79928	2.24051	2.45121	1.37509	0.963531	1.34489	2.03366	1.02408	2.25902e-06	4.50663e-05	up	yes
TraesCS1B02G456900	1.61055	0.856357	1.55463	0.561919	0.509561	0.441311	2.65836	1.41054	2.49149e-06	4.89903e-05	up	yes
TraesCS3A02G490700	13.2793	5.82443	10.4071	4.05695	5.74715	3.70519	2.18448	1.12729	2.57359e-06	5.04298e-05	up	yes
TraesCS2B02G395100	0.317237	0.401992	0.46745	0.055454	0.099019	0.039225	6.12644	2.61505	2.81887e-06	5.48572e-05	up	yes
TraesCS5D02G238700	4.64384	4.71182	5.50745	2.12561	3.21829	2.05798	2.00802	1.00577	3.12849e-06	6.0252e-05	up	yes
TraesCS4D02G283400	0.422337	0.298884	0.402741	0.046191	0.093018	0.084316	5.02835	2.33009	3.28088e-06	6.2832e-05	up	yes
TraesCS5D02G336900	1.45901	0.59494	1.91366	0.367769	0.449563	0.24529	3.73379	1.90064	3.4326e-06	6.52498e-05	up	yes
TraesCS6B02G284000	41.499	20.3017	48.9463	18.977	15.1664	19.762	2.05447	1.03876	3.58899e-06	6.79299e-05	up	yes
TraesCS1D02G442600	0.070937	0.261275	0.156999	0	0	0	1630.7	10.6713	3.68286e-06	6.94749e-05	up	yes
TraesCS6B02G154700	1.4182	1.2845	0.873038	0.508498	0.547936	0.44893	2.37533	1.24813	3.70907e-06	6.99029e-05	up	yes
TraesCS7A02G055900	0.073718	0.337108	0.133152	0	0	0	1813.26	10.8244	3.72907e-06	7.02464e-05	up	yes
TraesCS3B02G578600	2.87573	2.3082	1.54553	0.932304	0.897535	1.02248	2.35929	1.23835	3.86955e-06	7.25377e-05	up	yes
TraesCS4B02G205700	1.62644	1.73474	1.56773	0.729314	0.157919	0.535403	3.46463	1.7927	3.88206e-06	7.27488e-05	up	yes
TraesCS5B02G336300	6.27097	2.94381	6.30452	2.78231	2.41609	2.435	2.03308	1.02367	4.11141e-06	7.65411e-05	up	yes
TraesCS4B02G070700	0.089875	0.150775	0.18144	0	0	0	1406.97	10.4584	4.12475e-06	7.67534e-05	up	yes
TraesCS2D02G374600	5.20555	2.64929	5.63896	2.28893	2.42322	1.94223	2.02781	1.01992	4.22033e-06	7.83483e-05	up	yes
TraesCS5A02G122700	2.82397	2.66568	3.46626	0.913059	1.89219	0.892632	2.42191	1.27614	4.22393e-06	7.8386e-05	up	yes
TraesCS3D02G349100	1.46173	1.67332	0.99402	0.395474	0.60696	0.405806	2.93208	1.55192	4.33491e-06	8.01196e-05	up	yes
TraesCS2A02G385600	3.46124	2.16248	3.62666	1.63164	1.28044	0.97054	2.38251	1.25248	4.39012e-06	8.09704e-05	up	yes
TraesCS6D02G313500	0.516319	42.627	3.25397	0.107853	0.128548	0.212345	103.393	6.692	4.50951e-06	8.28837e-05	up	yes
TraesCS6D02G190400	2.81249	1.78485	2.05223	0.963378	0.899467	0.888696	2.41667	1.27302	4.64459e-06	8.50915e-05	up	yes
TraesCS5A02G314800	1.71475	3.32654	1.2615	0.605824	0.651535	0.866619	2.96744	1.56922	4.67964e-06	8.55946e-05	up	yes
TraesCS7A02G096200	1.40593	1.61425	1.37501	0.563717	0.778293	0.47294	2.42166	1.27599	4.74756e-06	8.67372e-05	up	yes
TraesCS2D02G371500	0.702721	0.67092	0.872305	0.20577	0.277062	0.154262	3.5253	1.81775	4.91901e-06	8.94171e-05	up	yes
TraesCS2B02G570800	0.332131	0.326012	0.376307	0.040198	0.039389	0.067941	7.01189	2.8098	5.11334e-06	9.2526e-05	up	yes
TraesCS4A02G326400	2.28921	1.45202	1.57671	0.701858	0.816206	0.536383	2.5885	1.37212	5.19852e-06	9.38534e-05	up	yes
TraesCS3B02G446500	0.322043	0.024954	0.321266	0	0	0	2227.54	11.1212	5.32443e-06	9.58651e-05	up	yes
TraesCS2A02G205900	46.3978	20.9836	66.3914	11.3351	16.5048	22.8372	2.63971	1.40038	5.35354e-06	9.63456e-05	up	yes
TraesCS6A02G334100	0.247222	14.2154	2.32421	0.019561	0	0.043925	264.418	8.04668	5.47512e-06	9.81997e-05	up	yes
TraesCS2B02G323600	1.85572	1.45152	1.52167	0.75473	0.719885	0.644509	2.27872	1.18823	5.47926e-06	9.82337e-05	up	yes
TraesCS5B02G299000	1.53965	0.856651	1.68983	0.657126	0.653819	0.654013	2.0795	1.05624	5.93455e-06	0.000105277	up	yes
TraesCS3D02G141900	1.08065	0.77715	0.878222	0.130979	0.125279	0.36314	4.41723	2.14314	6.08262e-06	0.000107541	up	yes
TraesCS7D02G523900	1.15115	1.034	1.19919	0.138305	0.519322	0.155209	4.16362	2.05784	7.90341e-06	0.00013493	up	yes
TraesCS5B02G531600	1.40727	1.74128	1.22272	0.165996	0.133884	0.615932	4.77311	2.25493	8.53915e-06	0.00014424	up	yes
TraesCS6D02G216600	1.81165	1.43586	1.61129	0.654833	0.87332	0.602434	2.28049	1.18935	8.87002e-06	0.000149121	up	yes
TraesCS1D02G420400	0.172415	0.058014	0.239919	0	0	0	1567.83	10.6146	8.92425e-06	0.000149849	up	yes
TraesCS7A02G508700	0.503865	0.2508	0.515537	0.09739	0.06803	0.049904	5.89903	2.56048	9.17825e-06	0.000153426	up	yes
TraesCS5D02G522300	0.759914	1.12392	0.411585	0.209006	0.160436	0.143233	4.47734	2.16264	1.02714e-05	0.000169628	up	yes
TraesCS2D02G407300	1.5523	0.853435	1.74499	0.55051	0.613185	0.513646	2.47459	1.30719	1.08501e-05	0.000178038	up	yes
TraesCS6A02G124800	1.34866	1.68569	1.06153	0.465127	0.331858	0.827111	2.52194	1.33453	1.14081e-05	0.000186041	up	yes
TraesCS7A02G253300	1.7109	1.75466	1.84586	0.781106	0.272478	0.73112	2.97607	1.57341	1.20752e-05	0.000195835	up	yes
TraesCSU02G085100	0.591163	0.402436	0.44188	0.125548	0.169003	0.108154	3.56459	1.83374	1.31521e-05	0.000211315	up	yes
TraesCS1B02G411100	0.082536	0.084095	0.066342	0	0	0	776.577	9.60098	1.31792e-05	0.000211664	up	yes
TraesCS6A02G261000	0.642588	0.644271	0.886907	0.321405	0.39581	0.369244	2.00078	1.00056	1.39103e-05	0.000221791	up	yes
TraesCS6B02G288300	0.426295	0.430065	0.695091	0.046646	0.061778	0.14812	6.0475	2.59634	1.45121e-05	0.000230185	up	yes
TraesCS2D02G027600	1.58999	1.29616	1.32933	0.571062	0.788767	0.685149	2.06138	1.04361	1.47512e-05	0.000233371	up	yes
TraesCS3D02G310200	0.785757	0.632746	0.838166	0.297526	0.34922	0.231557	2.56935	1.3614	1.53907e-05	0.000242379	up	yes
TraesCS4D02G069500	0.288805	0.237141	0.161801	0	0	0.021901	31.4025	4.97281	1.59353e-05	0.000249668	up	yes
TraesCS5B02G067700	5.31637	3.05684	4.86403	1.92472	2.70403	1.47825	2.16755	1.11607	1.6523e-05	0.000257757	up	yes
TraesCS5D02G559900	0.507157	2.25176	0.780583	0.06825	0.016939	0.16068	14.3959	3.84758	1.66115e-05	0.000258985	up	yes
TraesCS2A02G218700	14.3493	6.14718	19.8143	5.61803	7.12223	5.26391	2.23897	1.16283	1.68887e-05	0.000262944	up	yes
TraesCS1B02G088600	0.763045	0.165731	0.638916	0.084333	0	0.022924	14.6162	3.8695	1.78362e-05	0.000275482	up	yes
TraesCS7B02G118200	0.351015	0.33897	0.307727	0.047948	0.070119	0	8.45039	3.07902	1.78979e-05	0.000276221	up	yes
TraesCS1B02G244800	0.64351	0.533496	0.610559	0.256633	0.156849	0.158836	3.12338	1.64311	1.81889e-05	0.000280304	up	yes
TraesCS2B02G145000	0.212789	0.117098	0.1521	0	0	0	1606.62	10.6498	1.92639e-05	0.000294725	up	yes
TraesCS7A02G435000	0.485179	0.223192	0.347476	0.111775	0.011143	0.035843	6.65054	2.73347	2.01357e-05	0.000306234	up	yes
TraesCS6A02G326500	0.613957	0.7883	0.586804	0.262594	0.0915064	0.203558	3.56681	1.83463	2.0365e-05	0.000309366	up	yes
TraesCS3B02G465200	4.0939	2.01512	4.79796	1.59151	1.76639	1.77912	2.12321	1.08625	2.24378e-05	0.000337289	up	yes
TraesCS3A02G488200	1.87773	1.23431	1.36827	0.446628	0.366165	0.688185	2.98492	1.57769	2.56659e-05	0.000380008	up	yes
TraesCS7D02G137200	0.580506	0.354589	0.324274	0.0328427	0.135117	0.0924871	4.83541	2.27364	2.68167e-05	0.000394691	up	yes
TraesCS7B02G031400	0.243553	0.14889	0.241997	0	0	0	2114.8	11.0463	2.82091e-05	0.000413042	up	yes
TraesCS7D02G232500	0.397758	0.209762	0.332499	0.05291	0	0	17.7664	4.15108	2.87034e-05	0.000419737	up	yes
TraesCS2A02G134500	0.129854	0.195992	0.020132	0	0	0	1153.26	10.1715	3.08931e-05	0.000447637	up	yes
TraesCS5B02G315700	1.03041	1.45304	1.01315	0.288885	0.331787	0.601752	2.86038	1.51621	3.13864e-05	0.000453544	up	yes
TraesCS1A02G370200	1.65314	2.16805	1.35396	0.613354	0.378425	0.869364	2.78064	1.47541	3.2348e-05	0.000465322	up	yes
TraesCS2A02G524900	0.940699	0.718387	0.748164	0.230281	0.312226	0.111312	3.68183	1.88042	3.28702e-05	0.000472406	up	yes
TraesCS7D02G339000	0.656041	1.23039	1.30161	0.243587	0.355077	0.391213	3.22065	1.68735	3.37842e-05	0.000483616	up	yes
TraesCS5B02G202200	11.0887	22.937	11.1388	5.30072	4.09972	4.88367	3.16187	1.66078	3.40292e-05	0.000486861	up	yes
TraesCS5D02G374100	2.46033	4.1272	2.08182	1.09909	1.59975	1.15921	2.24708	1.16805	3.4224e-05	0.000489207	up	yes
TraesCS4B02G302100	0.137045	0.056231	0.141204	0	0	0	1114.93	10.1227	3.52236e-05	0.00050178	up	yes
TraesCS3D02G406900	0.351853	0.256018	0.252126	0.0228322	0.0514007	0.0416684	7.42008	2.89143	3.54452e-05	0.000504484	up	yes
TraesCS3B02G130500	0.165537	0.488201	0.123592	0	0	0	2591.1	11.3393	3.60249e-05	0.000511269	up	yes
TraesCS2B02G233100	17.4383	8.33496	26.9988	7.22866	9.16718	7.27229	2.22967	1.15683	3.6837e-05	0.000521675	up	yes
TraesCS4A02G330100	5.79395	8.3759	4.46091	3.17884	2.23254	3.8253	2.01704	1.01224	3.83811e-05	0.00053998	up	yes
TraesCS2D02G119100	0.187629	0.745894	0.206765	0	0.0437263	0.0293512	15.6038	3.96383	3.91139e-05	0.000548347	up	yes
TraesCS1A02G433900	0.058642	0.076325	0.146869	0	0	0	939.453	9.87568	4.05315e-05	0.000565381	up	yes
TraesCS5D02G321100	4.18611	6.47886	2.34994	1.85281	2.07318	1.62074	2.34641	1.23046	4.13177e-05	0.000574175	up	yes
TraesCS2A02G064000	0.204794	0.467539	0.236285	0.051094	0.058427	0.032781	6.38514	2.67472	4.44485e-05	0.000611476	up	yes
TraesCS4D02G269900	4.89697	2.59923	5.89728	2.14229	2.57312	1.4367	2.17706	1.12238	4.6148e-05	0.000631901	up	yes
TraesCS1B02G101100	1.98023	3.14433	2.09768	0.848634	0.157506	0.991142	3.61604	1.85441	4.96534e-05	0.000673169	up	yes
TraesCS1D02G281700	1.86641	0.973953	1.92034	0.654493	0.39753	0.684816	2.74102	1.45471	5.03647e-05	0.0006813	up	yes
TraesCS5A02G337700	1.12671	1.08706	1.39096	0.595457	0.64055	0.478806	2.10211	1.07184	5.05758e-05	0.000683807	up	yes
TraesCS1D02G080600	0.498933	0.485519	0.498148	0.022432	0.164328	0.049973	6.26275	2.6468	5.2733e-05	0.000708989	up	yes
TraesCS7D02G201400	7.69042	5.9223	2.31296	1.77025	2.7111	1.72231	2.56714	1.36016	6.13542e-05	0.000805403	up	yes
TraesCS3B02G498900	0.372434	0.291685	0.260329	0.085496	0.078854	0.179691	2.68703	1.42601	6.18588e-05	0.000811357	up	yes
TraesCS2B02G574500	1.66723	1.01243	1.88203	0.630963	0.644837	0.74725	2.25486	1.17304	6.5456e-05	0.000852484	up	yes
TraesCS6A02G319300	0.236936	12.3763	0.1043	0	0	0	42391.7	15.3715	6.58791e-05	0.000857292	up	yes
TraesCS1D02G023000	0.636748	0.809723	0.47126	0.283088	0.271227	0.335765	2.15456	1.10739	6.70782e-05	0.000871896	up	yes
TraesCS7A02G446200	0.84023	0.407042	1.14009	0.292093	0.239271	0.120145	3.66436	1.87356	7.0522e-05	0.000910549	up	yes
TraesCS4D02G046200	0.16374	0.175538	0.135254	0.014166	0.018569	0.017327	9.47889	3.24472	7.12165e-05	0.00091862	up	yes
TraesCSU02G145500	2.13132	5.50197	1.79689	0.980175	0.698984	1.12655	3.36107	1.74892	7.42468e-05	0.000951526	up	yes
TraesCS7A02G211200	0.568018	0.536029	0.977692	0.097675	0.286445	0.07761	4.50856	2.17267	7.73376e-05	0.000985254	up	yes
TraesCS3A02G371500	3.92016	7.0574	2.2423	1.99414	1.606	1.90732	2.40036	1.26325	7.92159e-05	0.00100579	up	yes
TraesCS2D02G033200	0.374568	3.55368	0.393625	0.0135535	0.0567116	0.0951459	26.1281	4.70753	7.9628e-05	0.00101038	up	yes
TraesCS1A02G276600	0.114035	0.156421	0.104925	0	0	0.0120645	31.1145	4.95952	7.97629e-05	0.00101193	up	yes
TraesCS3B02G068300	2.15346	3.9085	1.55914	1.13106	1.20445	1.31842	2.08573	1.06055	8.31207e-05	0.00104667	up	yes
TraesCS3B02G010100	2.58159	1.31879	2.86743	0.853208	0.614362	1.13475	2.60068	1.37889	8.70521e-05	0.00108828	up	yes
TraesCS1A02G353600	2.1059	1.27948	0.816664	0.424548	0.253088	0.636737	3.19699	1.67672	8.78263e-05	0.00109623	up	yes
TraesCS4B02G039000	3.24805	4.96294	3.25926	2.25975	1.23679	1.81062	2.16128	1.11189	8.91529e-05	0.00111083	up	yes
TraesCS1A02G266100	0.501822	0.737347	0.345638	0.135904	0.152244	0.147643	3.63662	1.8626	9.34255e-05	0.00115843	up	yes
TraesCS5D02G530100	1.32587	0.652754	1.62673	0.203165	0.135975	0.534678	4.12598	2.04474	9.75019e-05	0.00120092	up	yes
TraesCS4B02G200600	0.458042	0.359019	0.525874	0.073094	0.010951	0.165668	5.37791	2.42705	9.76991e-05	0.00120278	up	yes
TraesCS5D02G210000	6.98823	14.0422	6.7173	3.57784	3.40286	3.65946	2.60783	1.38285	9.8815e-05	0.0012137	up	yes
TraesCS3D02G023100	0.935911	0.588193	0.718041	0.283888	0.355789	0.33141	2.3089	1.20721	0.000100933	0.00123761	up	yes
TraesCS1D02G344900	1.87997	0.889814	2.50827	0.815746	0.614365	0.628407	2.564	1.3584	0.000104225	0.00127463	up	yes
TraesCSU02G206500	0.968462	0.695103	1.93554	0.278751	0.078525	0.531646	4.04885	2.01751	0.000111817	0.00135392	up	yes
TraesCS7D02G436400	0.152159	0.254507	0.086152	0.023085	0	0.013482	13.4771	3.75244	0.0001269	0.00150982	up	yes
TraesCS3D02G475800	0.905459	0.704452	1.1122	0.528628	0.375106	0.233158	2.39434	1.25963	0.000140203	0.00164837	up	yes
TraesCS2B02G039900	0.462588	0.702689	0.508551	0.213008	0.0818673	0.147335	3.78514	1.92035	0.000141036	0.00165744	up	yes
TraesCS1D02G111400	0.541692	0.458133	0.479165	0.108702	0.103141	0.156864	4.01129	2.00407	0.000142398	0.00167171	up	yes
TraesCS6B02G349500	0.120106	12.1118	0.950612	0	0.033156	0.049797	158.915	7.31211	0.000146166	0.00170963	up	yes
TraesCS3A02G297400	0.385221	0.350499	0.452414	0.086491	0.109303	0.146295	3.47317	1.79625	0.000146525	0.00171281	up	yes
TraesCS4D02G302000	0.87609	0.388446	0.44096	0.139439	0.076725	0.205517	4.04452	2.01597	0.000167142	0.00191686	up	yes
TraesCS7D02G046700	0.214906	0.087594	0.249996	0.022494	0	0	24.5619	4.61835	0.000168325	0.00192904	up	yes
TraesCS4D02G205400	1.40176	1.50904	2.43032	0.62725	0.794792	0.919952	2.28059	1.18941	0.000179967	0.00203836	up	yes
TraesCS7B02G229300	4.28879	1.76909	5.15148	1.29778	1.32527	2.15595	2.34555	1.22992	0.000184105	0.00207927	up	yes
TraesCS6D02G218600	0.137509	0.144557	0.046642	0	0	0	1095.69	10.0976	0.00018552	0.00209198	up	yes
TraesCS2D02G253900	0.241705	0.230363	0.078611	0	0	0	1835.6	10.842	0.000194564	0.0021788	up	yes
TraesCS2B02G388200	0.3176	0.664947	0.743114	0.148004	0.022316	0.14402	5.4898	2.45675	0.000194829	0.00218116	up	yes
TraesCS2D02G490900	1.42527	1.4598	1.48539	0.671676	0.296975	0.84494	2.40984	1.26894	0.000198902	0.00222018	up	yes
TraesCS3D02G256400	0.346634	0.348578	0.568715	0.039266	0.178085	0.047431	4.77346	2.25504	0.000207531	0.00230104	up	yes
TraesCS2D02G289900	1.3723	0.849804	1.45356	0.599193	0.313781	0.636309	2.37249	1.2464	0.000207537	0.00230104	up	yes
TraesCS2B02G300300	1.34182	1.00394	1.63999	0.675497	0.368004	0.603378	2.42019	1.27512	0.000211095	0.00233495	up	yes
TraesCS5D02G382600	2.31907	1.36404	1.39448	1.00676	0.745698	0.516563	2.23779	1.16208	0.000220896	0.00242882	up	yes
TraesCS2D02G374400	1.37214	0.755586	1.31988	0.528089	0.373565	0.58817	2.3141	1.21045	0.000230435	0.00251213	up	yes
TraesCS2D02G381800	0.367975	0.534668	0.532915	0.187707	0.209201	0.184031	2.4711	1.30515	0.000232882	0.00253464	up	yes
TraesCS2B02G244100	40.2284	17.6365	38.5885	12.8607	16.5926	11.6694	2.3455	1.2299	0.000233883	0.00254379	up	yes
TraesCS3A02G411600	2.46521	2.32986	1.72158	0.829633	0.879636	1.42277	2.08064	1.05703	0.000234881	0.0025522	up	yes
TraesCS3D02G492900	2.37895	3.49948	1.43574	0.841094	1.11027	0.915141	2.55161	1.35141	0.000240813	0.00260561	up	yes
TraesCS1D02G257600	0.68179	0.595717	0.446718	0.272854	0.325676	0.256577	2.01639	1.01177	0.000244149	0.00263595	up	yes
TraesCS6B02G182000	0.74813	1.38538	0.697447	0.183019	0.330475	0.46446	2.89477	1.53345	0.000254739	0.00273541	up	yes
TraesCS7A02G382100	0.298865	0.247533	0.193021	0.079112	0.045218	0.101292	3.27725	1.71248	0.000275847	0.0029288	up	yes
TraesCS2D02G464400	0.307558	0.237571	0.149035	0	0.033084	0	20.9819	4.39107	0.000290279	0.00305711	up	yes
TraesCS2B02G606700	0.287395	0.269653	0.18337	0.099804	0.061105	0.115233	2.68129	1.42293	0.000291338	0.00306598	up	yes
TraesCS2B02G155300	0.27805	0.42164	0.251364	0.070661	0	0	13.4594	3.75054	0.000295829	0.00310526	up	yes
TraesCS3A02G354500	0.081982	0.088499	0.016836	0	0	0	624.39	9.2863	0.000305824	0.00319498	up	yes
TraesCS1A02G424100	1.68337	0.909416	1.7094	0.669681	0.857289	0.613372	2.01005	1.00723	0.00030763	0.00320836	up	yes
TraesCS5B02G484000	0.979902	0.921572	1.164	0.489426	0.363848	0.376435	2.49284	1.31779	0.000308229	0.00321288	up	yes
TraesCS2B02G040500	0.798543	1.29102	1.40515	0.589774	0.138464	0.417102	3.05125	1.6094	0.00031176	0.00324441	up	yes
TraesCS7B02G104700	2.53699	1.31543	2.50573	1.18849	0.6685	1.11741	2.13763	1.09601	0.00031232	0.00324874	up	yes
TraesCS7B02G145200	0.271731	0.293828	0.180064	0.092594	0.07474	0.042669	3.55053	1.82804	0.00031613	0.00328579	up	yes
TraesCS2D02G367600	0.483881	0.915328	0.726408	0.292915	0.101133	0.193425	3.61824	1.85529	0.000317234	0.00329468	up	yes
TraesCS6B02G357600	1.00623	0.317334	0.754367	0.280003	0.132226	0.251464	3.13086	1.64656	0.000336369	0.00346172	up	yes
TraesCS5B02G244800	0.112504	0.872799	0.09367	0.024697	0.026518	0.055541	10.1069	3.33727	0.000338345	0.0034802	up	yes
TraesCS3D02G308900	2.47289	0.964441	2.78327	1.01319	0.696068	1.05399	2.25119	1.17069	0.000339762	0.00349211	up	yes
TraesCS2D02G122700	0.456589	0.840939	0.543154	0.228444	0.185826	0.24819	2.77856	1.47434	0.000359142	0.00365535	up	yes
TraesCS1D02G429800	1.76371	1.62492	1.60105	0.996367	0.733371	0.717027	2.0393	1.02807	0.000380547	0.00383439	up	yes
TraesCS6B02G061000	0.125129	0.13434	0.223406	0.022029	0.01189	0.053662	5.51347	2.46296	0.000380692	0.00383536	up	yes
TraesCS3B02G390700	0.470115	0.841645	0.164141	0.198768	0.063223	0.039381	4.89727	2.29198	0.000390413	0.00391732	up	yes
TraesCS6D02G241700	0.515869	0.274005	0.674784	0.159039	0.151362	0.138425	3.26331	1.70634	0.000391627	0.00392661	up	yes
TraesCS6B02G349700	0.095768	6.66313	0.198683	0	0.02009	0.03357	129.66	7.01859	0.000395814	0.00396258	up	yes
TraesCS6B02G080100	1.34211	0.736536	0.612016	0.308893	0.423032	0.220956	2.82371	1.49759	0.000413687	0.00410888	up	yes
TraesCS3D02G368900	1.57967	0.486268	0.439168	0.184122	0.033343	0.253864	5.31498	2.41007	0.000434706	0.0042839	up	yes
TraesCS3A02G441000	0.203119	0.132227	0.494137	0	0	0.033001	25.1351	4.65163	0.000441996	0.00434657	up	yes
TraesCS6B02G364800	0.165511	9.35365	1.44383	0	0	0.040528	270.504	8.07951	0.000447262	0.00439128	up	yes
TraesCS5B02G205300	3.9521	2.02756	2.15588	1.32971	0.966675	1.52288	2.13013	1.09094	0.000454258	0.00444788	up	yes
TraesCS3D02G278100	0.501156	0.364173	0.566461	0.237002	0.152068	0.178906	2.52086	1.33392	0.000455433	0.00445773	up	yes
TraesCS4D02G071300	0.254224	0.181888	0.51786	0.02746	0	0.071171	9.67213	3.27383	0.000456227	0.0044644	up	yes
TraesCS3D02G098600	0.026106	0.044572	0.180641	0	0	0	837.73	9.71034	0.000457263	0.00447289	up	yes
TraesCS5B02G068100	1.02878	0.732882	0.83397	0.468142	0.240665	0.390986	2.36011	1.23886	0.000481686	0.0046778	up	yes
TraesCS4B02G346900	2.39675	1.37763	1.63919	1.02533	0.496287	0.824762	2.3072	1.20614	0.000492584	0.00476499	up	yes
TraesCS6D02G306300	0.751549	0.579899	0.489299	0.343088	0.167295	0.135318	2.8198	1.49559	0.000493556	0.00477148	up	yes
TraesCS1A02G229300	0.287386	0.228753	0.135838	0.053835	0.02066	0.037803	5.80578	2.53749	0.000503354	0.00485261	up	yes
TraesCS1A02G282400	0.529974	0.812808	0.682553	0.257392	0.237926	0.217105	2.84288	1.50735	0.00051138	0.0049133	up	yes
TraesCS5A02G309200	0.670521	0.448193	0.648533	0.298892	0.158033	0.217483	2.62044	1.38981	0.000512538	0.00492323	up	yes
TraesCS1B02G129800	0.076283	0.316948	0.567345	0.031599	0.032109	0	15.0778	3.91435	0.000519219	0.00497777	up	yes
TraesCS2A02G543200	0.354281	0.620721	0.377248	0.145662	0.230246	0.112756	2.76724	1.46845	0.00052184	0.00500048	up	yes
TraesCS3A02G506200	0.418453	0.273929	0.147295	0.064157	0.068799	0.088202	3.79673	1.92476	0.00052194	0.00500084	up	yes
TraesCS7B02G339200	0.356322	0.527096	0.674056	0.254912	0.196106	0.288921	2.10487	1.07373	0.000551543	0.00524147	up	yes
TraesCS2D02G575800	0.115629	0.218497	0.185248	0.009507	0.050917	0	8.59549	3.10358	0.000576847	0.0054486	up	yes
TraesCS2B02G215000	0.273749	0.19153	0.48887	0.089306	0.027095	0	8.19709	3.03511	0.000596678	0.00561331	up	yes
TraesCS3D02G348400	0.045861	0.016492	0.073981	0	0	0	454.447	8.82797	0.000632209	0.00589036	up	yes
TraesCS6B02G406200	1.04522	1.17504	0.926301	0.350227	0.678804	0.368478	2.25155	1.17092	0.000648077	0.00601211	up	yes
TraesCS4D02G019200	0.347035	0.207232	0.484554	0.072379	0.059	0	7.90706	2.98314	0.000649621	0.00602291	up	yes
TraesCS7A02G023400	0.026212	0.022125	0.018982	0	0	0	224.397	7.80991	0.000650639	0.00602989	up	yes
TraesCS3D02G382800	0.486596	0.363307	0.503888	0.036553	0.115794	0.119085	4.98759	2.31834	0.000650677	0.00602989	up	yes
TraesCS2A02G285900	0.589503	0.206193	0.273263	0.071043	0.030058	0.117449	4.89114	2.29017	0.000659267	0.00608959	up	yes
TraesCS1B02G249000	0.578654	7.88694	0.663275	0.22389	0.256216	0.150005	14.4877	3.85676	0.000660268	0.006096	up	yes
TraesCS5B02G307100	0.060447	0.026117	0.270812	0	0	0	1191.25	10.2183	0.000662999	0.00611624	up	yes
TraesCS2A02G051500	0.358658	0.609854	0.578933	0.066159	0.074614	0.203176	4.49905	2.16962	0.000670312	0.00617675	up	yes
TraesCS4D02G212300	1.16549	2.10957	0.907213	0.655227	0.503325	0.359728	2.75461	1.46185	0.000694716	0.00636521	up	yes
TraesCS2A02G191600	0.213583	0.114494	0.235565	0	0	0.034664	16.2602	4.02327	0.000717332	0.00653848	up	yes
TraesCSU02G031000	2.11147	0.800588	2.40969	0.849378	0.763138	0.696499	2.30477	1.20462	0.000719221	0.00654989	up	yes
TraesCS7B02G105200	2.56299	4.26485	2.39311	0.630945	0.618749	1.90722	2.92087	1.5464	0.000722606	0.00657674	up	yes
TraesCSU02G216800	0.172586	0.259451	0.276686	0.044127	0	0	16.061	4.00549	0.000735592	0.00667047	up	yes
TraesCS7A02G383900	0.19105	7.02829	0.218053	0.021723	0	0.060892	90.0247	6.49225	0.000779958	0.00702148	up	yes
TraesCS2A02G573500	0.710631	0.925878	0.505752	0.233871	0.159885	0.362934	2.83109	1.50136	0.000786803	0.00707188	up	yes
TraesCS2A02G073800	0.014076	0.030688	0.056819	0	0	0	338.61	8.40348	0.000820804	0.00731809	up	yes
TraesCS3A02G101400	0.089156	0.033783	0.104884	0	0	0	759.41	9.56874	0.000823872	0.00733862	up	yes
TraesCSU02G026800	0.483623	0.368311	0.538038	0.22559	0.146928	0.107312	2.8968	1.53446	0.000825028	0.00734623	up	yes
TraesCS3D02G046600	0.052576	3.30866	0.317696	0.111226	0.125389	0.051613	12.764	3.674	0.000841303	0.00746625	up	yes
TraesCS6D02G366400	1.28154	0.274959	1.14595	0.271352	0.259329	0.048877	4.66295	2.22124	0.000842054	0.00747124	up	yes
TraesCS4D02G341800	2.13148	2.65998	1.23231	0.998521	1.0648	0.791003	2.1104	1.07752	0.000850761	0.00753335	up	yes
TraesCS1B02G066600	0.011566	0.145937	0.254342	0.013708	0	0	30.0441	4.90901	0.0008588	0.0075893	up	yes
TraesCS2B02G181800	0.774536	0.62462	0.87676	0.213663	0.312288	0.299133	2.75841	1.46383	0.000921668	0.00806056	up	yes
TraesCS2B02G469100	0.797613	1.12174	0.762195	0.276943	0.457106	0.34407	2.48725	1.31455	0.000932634	0.00813854	up	yes
TraesCS2D02G164500	0.185302	0.149974	0.0825	0.026749	0.016944	0	9.56162	3.25726	0.000950379	0.00827158	up	yes
TraesCS6D02G260300	1.42069	0.817231	1.04156	0.426727	0.334819	0.699272	2.24496	1.16669	0.000956976	0.00831936	up	yes
TraesCS5A02G545300	4.92686	11.1129	0.929445	0.702762	0.208571	0.826829	9.76271	3.28728	0.00097485	0.00844108	up	yes
TraesCS3B02G551600	4.00197	1.34886	2.95446	0.992967	1.49902	1.01405	2.36885	1.24419	0.000977176	0.00845569	up	yes
TraesCS5B02G561000	0.426423	0.41583	0.312983	0.159264	0.170434	0.150368	2.40641	1.26688	0.000978398	0.0084635	up	yes
TraesCS4D02G067200	0.874252	1.22114	1.05381	0.079742	0.39453	0	6.64006	2.7312	0.000993135	0.00857231	up	yes
TraesCS1D02G322000	0.048005	0.023872	0.046295	0	0	0	393.907	8.62171	0.00100892	0.00868212	up	yes
TraesCS4B02G377500	0.917957	2.90202	0.952344	0.524438	0.31186	0.70662	3.09305	1.62903	0.0010119	0.00870208	up	yes
TraesCS2D02G289300	0.768439	0.360778	0.815173	0.258107	0.066108	0.171749	3.92043	1.97101	0.00106566	0.00906917	up	yes
TraesCS1A02G415500	0.179222	0.148115	0.256593	0.045657	0.034143	0	7.31742	2.87133	0.00106995	0.00909691	up	yes
TraesCS5D02G268800	0.185612	0.388034	0.398904	0.092827	0.033174	0.111991	4.08648	2.03086	0.00107346	0.00911893	up	yes
TraesCS5D02G410500	0.136579	0.173361	0.172551	0	0.020172	0.024225	10.8676	3.44197	0.00110778	0.00934848	up	yes
TraesCS2D02G116600	0.068149	0.026876	0.115864	0	0	0	702.963	9.45731	0.00113442	0.00954496	up	yes
TraesCS7B02G284900	0.105956	0.112911	0.159626	0.011603	0.035545	0	8.02776	3.005	0.00113848	0.00957505	up	yes
TraesCS2B02G122400	0.442396	0.235899	0.251747	0.079411	0.055054	0.160122	3.1571	1.6586	0.00115354	0.00967603	up	yes
TraesCS2A02G011200	0.166403	0.116178	0.238329	0	0	0.03627	14.362	3.84419	0.00116588	0.00975568	up	yes
TraesCS4A02G248600	0.678342	0.574907	0.558254	0.353143	0.136147	0.147258	2.84582	1.50885	0.00121323	0.0100816	up	yes
TraesCS4D02G257100	0.376207	0.361363	1.01276	0.135444	0.222044	0.149544	3.4521	1.78747	0.0012169	0.010108	up	yes
TraesCS5D02G081700	1.58082	1.46778	0.507536	0.603253	0.392835	0.438549	2.47877	1.30963	0.00122329	0.0101486	up	yes
TraesCS2D02G426300	0.014628	0.088361	0.097546	0	0	0	668.45	9.38468	0.00122513	0.0101617	up	yes
TraesCS3A02G287400	1.96019	2.63182	0.909828	0.897468	0.810629	0.438643	2.56288	1.35777	0.00123678	0.010238	up	yes
TraesCS4A02G269700	12.0456	4.18566	11.918	5.13017	5.22569	3.64295	2.01084	1.0078	0.00125897	0.0103731	up	yes
TraesCS4A02G244300	0.141576	0.06058	0.025851	0	0	0	760.023	9.5699	0.00128203	0.0105357	up	yes
TraesCS2B02G215100	0.297205	0.25638	0.362979	0.11525	0.045676	0.088376	3.67652	1.87834	0.00130128	0.0106747	up	yes
TraesCS7B02G372200	0.567623	0.378201	0.366697	0	0.108522	0	12.0945	3.59628	0.00131718	0.0107811	up	yes
TraesCS6D02G256600	0.289436	0.300196	0.236441	0	0.056765	0.058978	7.13713	2.83534	0.00134367	0.0109584	up	yes
TraesCS7A02G387100	0.141829	0.241014	0.287278	0.063603	0.065249	0.035583	4.07529	2.0269	0.00135054	0.0110042	up	yes
TraesCS3D02G046300	0.07021	2.38685	0.169345	0.121342	0.114023	0.043039	9.4338	3.23784	0.00135919	0.0110623	up	yes
TraesCS1B02G299700	3.3976	2.93299	1.79523	0.691548	1.88877	1.2089	2.14445	1.10061	0.00146911	0.0117581	up	yes
TraesCS6B02G103900	3.29686	1.56857	3.14892	1.1835	1.94339	0.822401	2.02931	1.02099	0.00152982	0.0121621	up	yes
TraesCS7A02G374300	0.695038	0.73233	0.587459	0.362435	0.221352	0.287007	2.31378	1.21025	0.00159725	0.0125995	up	yes
TraesCS7D02G345700	0.178926	0.202325	0.11528	0.026086	0.021057	0	10.5324	3.39677	0.00162303	0.0127573	up	yes
TraesCS4D02G145600	0.958991	1.05907	0.806294	0.411017	0.456056	0.317332	2.38462	1.25376	0.00163397	0.0128217	up	yes
TraesCS5A02G295300	0.487495	0.671534	0.642812	0.348852	0.25167	0.24897	2.12108	1.0848	0.00165195	0.0129449	up	yes
TraesCS5A02G555000	0.638352	0.486643	0.578781	0.293859	0.042344	0.154199	3.47424	1.7967	0.00173876	0.013492	up	yes
TraesCS2A02G283000	3.0219	1.60398	3.34092	1.64921	0.66389	1.49982	2.08942	1.0631	0.00173985	0.0134966	up	yes
TraesCS7A02G389300	0.101517	0.0984897	0.121234	0.019087	0	0	16.8304	4.073	0.00175354	0.0135815	up	yes
TraesCS3B02G486400	0.062072	0.053457	0.075461	0	0	0	636.633	9.31432	0.00176751	0.0136684	up	yes
TraesCS3A02G498500	0.171006	0.247698	0.183193	0.011285	0.053403	0.039947	5.75235	2.52415	0.00188875	0.0144456	up	yes
TraesCS5B02G294700	0.275413	0.308448	0.300893	0.126054	0.075735	0.094496	2.98616	1.57829	0.00188921	0.0144463	up	yes
TraesCS5D02G011900	0.194249	0.488693	0.130281	0.020804	0.087398	0.025485	6.08304	2.60479	0.00188978	0.0144493	up	yes
TraesCS6B02G096200	0.0609	0	0.097934	0	0	0	529.447	9.04834	0.00191276	0.014594	up	yes
TraesCS1B02G072500	0.766622	0.613893	0.592176	0.354005	0.293535	0.27818	2.13098	1.09152	0.00197643	0.014992	up	yes
TraesCS2B02G379300	0.579392	0.816953	0.473118	0.247473	0.348671	0.245783	2.22046	1.15086	0.00202269	0.0152772	up	yes
TraesCS4B02G120500	0.395457	0.60712	0.511045	0.068215	0.169116	0.107141	4.39403	2.13555	0.00202989	0.0153257	up	yes
TraesCS2D02G089000	0.197252	0.200119	0.391715	0.043773	0.083358	0.036684	4.81693	2.26812	0.00204335	0.0154113	up	yes
TraesCS6B02G349800	0.005771	3.68461	0.122361	0	0.009655	0	394.898	8.62534	0.00205488	0.0154776	up	yes
TraesCS3D02G180200	1.7708	0.916887	0.72191	0.401489	0.4824	0.294928	2.89239	1.53226	0.00209104	0.0156965	up	yes
TraesCS3A02G414600	0.141772	0.073271	0.030984	0	0	0	820.09	9.67964	0.00215582	0.0161006	up	yes
TraesCS7D02G497700	0.387814	0.286187	0.334081	0.083454	0.097703	0	5.56469	2.4763	0.00220577	0.0163828	up	yes
TraesCS7A02G427300	0.370694	0.211612	0.449255	0.113168	0.109676	0.081616	3.38817	1.7605	0.00243477	0.0177336	up	yes
TraesCS2A02G011000	0.634344	0.984151	0.943607	0.078417	0.4397	0.230877	3.42072	1.7743	0.0024423	0.0177786	up	yes
TraesCS2B02G136700	0	0.374533	0.168504	0	0	0	1810.12	10.8219	0.00247699	0.0179982	up	yes
TraesCS3D02G153400	0.427672	0.248502	0.629743	0.193422	0.181561	0.161121	2.43594	1.28448	0.00248938	0.0180667	up	yes
TraesCS4A02G420100	0	0.053995	0.247926	0	0	0	1006.4	9.97499	0.00250117	0.0181423	up	yes
TraesCS5A02G392700	0.20456	0.028088	0.119868	0.02218	0	0	15.8934	3.99036	0.00252369	0.0182657	up	yes
TraesCS7D02G130400	0.434856	0.359494	0.239171	0	0.072738	0.059587	7.81047	2.96541	0.00255504	0.0184438	up	yes
TraesCS2D02G371600	0.398427	0.393864	0.189946	0.056634	0.110731	0.078446	3.9959	1.99852	0.00267819	0.0191811	up	yes
TraesCS4A02G226700	0.0559932	0	0.290285	0	0	0	1154.26	10.1728	0.00271649	0.0194134	up	yes
TraesCS3B02G592000	0.108257	0.172689	0.243328	0.039673	0.022622	0	8.41599	3.07313	0.00274812	0.01959	up	yes
TraesCS5D02G499000	0.142552	0.188933	0.338538	0.078144	0.140928	0.053336	2.45963	1.29844	0.00307467	0.0214293	up	yes
TraesCS3B02G130900	0	0.66509	0.19038	0	0	0	2851.57	11.4775	0.00312537	0.0217198	up	yes
TraesCS5D02G342400	0.87532	0.145015	0.234051	0.022017	0.124909	0.118742	4.72163	2.23928	0.00318946	0.0220744	up	yes
TraesCS1A02G189700	1.80258	1.85976	1.7679	0.959518	0.965063	0.418646	2.31742	1.21252	0.00321179	0.0221888	up	yes
TraesCS2A02G136100	0.321351	0.190062	0.492709	0.100792	0.117334	0.107931	3.07959	1.62274	0.00321186	0.0221888	up	yes
TraesCS7B02G162400	0.078374	0.152514	0.127936	0	0.012412	0.020138	11.0238	3.46255	0.0032905	0.0226349	up	yes
TraesCS4B02G342000	0.399291	1.74551	0.277203	0.276888	0.225859	0.296522	3.03028	1.59945	0.00329067	0.0226349	up	yes
TraesCS5B02G075800	0.557423	0.817768	0.188083	0.222737	0.100041	0.143943	3.34948	1.74394	0.0033715	0.0230669	up	yes
TraesCS5B02G436500	0.226215	0.250416	0.35207	0.106167	0.089298	0.121077	2.61798	1.38845	0.0033992	0.0232285	up	yes
TraesCS3D02G517800	0.454207	0.576909	0.200889	0.143973	0.069564	0.139403	3.49069	1.80351	0.00340708	0.0232723	up	yes
TraesCS3D02G092900	0.127095	0.211569	0.134353	0.0533036	0.0255843	0.0562325	3.50071	1.80765	0.00351888	0.0238676	up	yes
TraesCS2A02G439500	0.320354	0.123857	0.439237	0.080699	0.068763	0.088699	3.70946	1.89121	0.00354928	0.0240307	up	yes
TraesCS7D02G380400	0.202481	4.09993	0.098368	0.062521	0.067947	0.127563	17.0552	4.09214	0.00366076	0.0246141	up	yes
TraesCS2D02G482400	0.297645	0.232283	0	0	0	0	1766.43	10.7866	0.0036865	0.0247614	up	yes
TraesCS4D02G206600	0.917077	1.29685	0.426631	0.27892	0.226972	0.60788	2.37082	1.24539	0.00369213	0.0247914	up	yes
TraesCS4D02G010700	0.54197	0.632654	0.500231	0.147583	0.239968	0.296013	2.45018	1.29289	0.00369272	0.0247926	up	yes
TraesCS6A02G320700	0.651911	0.437627	1.06039	0.357802	0.322299	0.119981	2.68713	1.42607	0.00369909	0.0248333	up	yes
TraesCS7D02G188400	0.74204	0.594303	0.656337	0.083036	0.339657	0.044729	4.26313	2.09191	0.00371774	0.024929	up	yes
TraesCS6D02G213100	0.630941	0.339615	0.365499	0.181755	0.020537	0.137094	3.93668	1.97698	0.0037521	0.0250932	up	yes
TraesCS3B02G266200	1.34917	0.498253	0.840945	0.405385	0.342596	0.475897	2.19659	1.13527	0.00379359	0.0253038	up	yes
TraesCS1A02G240500	0.051244	0.035477	0.013694	0	0	0	334.717	8.3868	0.00380714	0.0253678	up	yes
TraesCS7B02G455100	0.100805	0.129138	0.281178	0.041124	0.019288	0	8.46059	3.08076	0.00384897	0.0256036	up	yes
TraesCS2A02G000400	0.278206	0.217669	0.329336	0.085201	0.12243	0.033396	3.42373	1.77557	0.00391457	0.0259271	up	yes
TraesCS2A02G116100	0.711713	1.14197	0.613374	0.338674	0.300549	0.565714	2.04746	1.03384	0.00392133	0.025961	up	yes
TraesCS2B02G451000	0.984274	1.02482	0.949489	0.589696	0.483511	0.291533	2.16788	1.11628	0.00393064	0.0260118	up	yes
TraesCS3B02G290800	0.282221	0.478808	0.136542	0.08582	0.072664	0.092913	3.57033	1.83606	0.00394939	0.0261141	up	yes
TraesCS5A02G394500	0.212868	0.070534	0.459158	0.037029	0	0.064766	7.29466	2.86684	0.00395939	0.0261715	up	yes
TraesCS3B02G446400	0.028835	0.053342	0.137199	0	0	0	731.253	9.51423	0.00398693	0.0263141	up	yes
TraesCS7D02G007600	0.018693	0.028445	0.020531	0	0	0	225.563	7.81739	0.00398832	0.0263203	up	yes
TraesCS4D02G071000	0.219273	0.209955	0.364068	0.060752	0.102892	0.050576	3.70318	1.88877	0.00405945	0.0266907	up	yes
TraesCS5A02G247600	0.688458	2.34467	0.291651	0.114043	0	0.073313	17.7458	4.1494	0.00406237	0.0267078	up	yes
TraesCS3D02G424000	0.532427	0.146437	0.427365	0.0686689	0.116236	0.123369	3.58846	1.84337	0.00411596	0.026993	up	yes
TraesCS2D02G508400	5.05365	0	5.54913	0	0	0	35342.6	15.1091	0.00420598	0.0274881	up	yes
TraesCS2D02G559600	0.121679	0.068301	0.067535	0	0.018087	0	14.2376	3.83163	0.00440113	0.0285543	up	yes
TraesCS5A02G027300	0.593893	1.03925	0.432767	0.397556	0.049223	0.178263	3.30523	1.72475	0.0045975	0.0295771	up	yes
TraesCS4B02G005600	0.039407	0.035967	0.057701	0	0	0	443.583	8.79306	0.00468759	0.0300156	up	yes
TraesCS6B02G103800	1.32563	0.648985	1.52139	0.533519	0.711783	0.502494	2.00024	1.00017	0.00470474	0.0300914	up	yes
TraesCS5D02G465200	0.194328	0.122997	0.077756	0.021458	0	0	18.4118	4.20256	0.00472018	0.0301829	up	yes
TraesCS4A02G269300	0.135423	0.180617	0.235957	0.013286	0	0.053243	8.29709	3.05261	0.00476515	0.0304289	up	yes
TraesCS5A02G120000	0.418102	0.655907	1.06847	0.265083	0.347017	0.410993	2.09412	1.06634	0.00477335	0.030469	up	yes
TraesCS6B02G145600	0.051557	0	0.035381	0	0	0	289.793	8.17888	0.00478446	0.0305325	up	yes
TraesCS5D02G568800	0.704554	0.54208	0.282932	0.176897	0.253349	0.195502	2.44438	1.28947	0.00485882	0.0309268	up	yes
TraesCS5B02G494800	0.156987	0.134575	0.180314	0.046003	0.042235	0.064688	3.08565	1.62557	0.0049747	0.031496	up	yes
TraesCS3B02G312000	0.558614	0.233998	0.431307	0.215293	0.151928	0.13024	2.46033	1.29885	0.00501515	0.0317192	up	yes
TraesCS2A02G490000	0.792051	0.555495	0.436213	0.250577	0.157731	0.344175	2.3705	1.24519	0.00503683	0.031831	up	yes
TraesCS3B02G508500	0.747451	0.509607	0.458177	0.206069	0.346473	0.220562	2.21864	1.14967	0.00504497	0.0318748	up	yes
TraesCS3B02G428000	0.352809	0.170553	0.444265	0.147253	0.055851	0.107325	3.11706	1.64019	0.00505376	0.0319202	up	yes
TraesCS3B02G484500	0.089622	0	0.181888	0	0	0	905.033	9.82183	0.00505918	0.0319519	up	yes
TraesCS7B02G273600	0.661358	0.615035	0.334375	0.307145	0.181212	0.167863	2.45462	1.2955	0.00509373	0.032109	up	yes
TraesCS7A02G508200	0.534817	0.623382	0.602588	0.147805	0.31537	0.033407	3.54581	1.82612	0.00523349	0.0328075	up	yes
TraesCS2A02G468500	0.154038	0.103296	0.094188	0.015465	0.030012	0	7.72967	2.95041	0.00525829	0.0329396	up	yes
TraesCS3B02G353000	0.824665	1.13694	0.763745	0.465869	0.510292	0.359766	2.04004	1.0286	0.0052719	0.0330107	up	yes
TraesCS3B02G380500	0.817332	0.602479	0.847225	0.369348	0.270421	0.457917	2.06529	1.04634	0.00528788	0.0330962	up	yes
TraesCS1A02G235000	0.372343	0.186061	0.397469	0.075183	0.093687	0.177951	2.7561	1.46263	0.00535266	0.0334332	up	yes
TraesCS3A02G361800	0.508765	0.434079	0.198678	0.151252	0.139541	0.107338	2.8672	1.51964	0.00546056	0.033986	up	yes
TraesCS6B02G135700	0.628196	0.676518	0.483284	0.278272	0.256907	0.272512	2.21372	1.14647	0.00555681	0.0344267	up	yes
TraesCS4B02G377400	33.0685	58.1276	28.308	18.5949	11.239	23.0644	2.25913	1.17577	0.00559393	0.0345946	up	yes
TraesCS5D02G235000	0.354	0.195432	0.457321	0	0.047843	0	21.0428	4.39526	0.00582337	0.0356471	up	yes
TraesCS2A02G086300	0	0.183603	0.055737	0	0	0	797.8	9.63988	0.00589231	0.0359859	up	yes
TraesCS6B02G171200	0.159502	1.69124	0.185514	0.195772	0.119652	0.21578	3.83327	1.93858	0.00590568	0.0360483	up	yes
TraesCS6A02G276200	0.125106	0.139754	0	0	0	0	882.867	9.78605	0.00594102	0.0362333	up	yes
TraesCS3A02G113000	0.028691	0.444989	0	0	0	0	1578.93	10.6247	0.00597955	0.0363956	up	yes
TraesCS4B02G170100	0.024927	0.148364	0.032457	0	0	0	685.827	9.4217	0.00599369	0.0364621	up	yes
TraesCS5B02G516300	0.060906	0.043496	0.029228	0	0	0	445.433	8.79907	0.00603558	0.0366468	up	yes
TraesCS2D02G162200	1.39626	0.946566	1.27116	0.868886	0.323739	0.431056	2.22579	1.15432	0.00613143	0.0371181	up	yes
TraesCS7B02G418600	0.636447	0.918213	1.02216	0.357938	0.492791	0.193086	2.46866	1.30373	0.00613595	0.0371372	up	yes
TraesCS7D02G372400	0.017947	0.039391	0.178762	0	0	0	787	9.62022	0.00621277	0.0374933	up	yes
TraesCS2B02G263100	0.621964	0.411825	0.582033	0.121511	0.260473	0.266301	2.49246	1.31757	0.0062461	0.0376316	up	yes
TraesCS4B02G285600	0.022226	0.244345	0	0	0	0	888.57	9.79534	0.00645427	0.0386483	up	yes
TraesCS7A02G415900	0.339462	0.409519	0.381233	0.068211	0.132327	0.231466	2.61621	1.38748	0.00648869	0.0388234	up	yes
TraesCS4A02G176700	0.284954	0.230549	0.46391	0.104838	0.132257	0.175872	2.37165	1.24589	0.00650718	0.0389123	up	yes
TraesCS2B02G308400	0.649625	0.367736	0.534369	0.233559	0.299023	0.098781	2.45775	1.29734	0.00690297	0.0408417	up	yes
TraesCS3B02G088100	0.185373	0.108254	0.173215	0.038641	0.040182	0.059643	3.37153	1.7534	0.00711958	0.0419178	up	yes
TraesCS4D02G183200	0.32989	0.341336	0.317446	0.129768	0.163559	0.07144	2.71042	1.43852	0.00730104	0.0427927	up	yes
TraesCS7D02G520200	0.141235	0.018444	0.175942	0.005542	0.026289	0	10.5438	3.39833	0.00736639	0.0431075	up	yes
TraesCS7B02G334900	0.122012	0.0378	0.065488	0.01632	0.019085	0	6.36351	2.66982	0.00737074	0.0431248	up	yes
TraesCS7B02G433100	0.160909	0	0.558176	0	0	0	2396.95	11.227	0.00748004	0.0436646	up	yes
TraesCS3A02G325300	0.749123	0.479789	0.740714	0.288914	0.165286	0.386798	2.34201	1.22775	0.00748231	0.0436747	up	yes
TraesCS3D02G104400	1.25098	0.166976	0.887537	0.18057	0.369358	0.16144	3.24093	1.69641	0.00755549	0.0440242	up	yes
TraesCS7D02G524200	0.650086	0.437325	0.668558	0.321291	0.188147	0.354011	2.03367	1.02408	0.0076023	0.0442353	up	yes
TraesCS6A02G083300	0.515009	0.712322	0.83727	0.322899	0.274896	0.329505	2.22647	1.15475	0.00771749	0.0447514	up	yes
TraesCS4A02G095500	0.611093	2.31928	0.876357	0.331667	0.166343	0.858414	2.80645	1.48874	0.00775306	0.0449085	up	yes
TraesCS5B02G234700	10.2657	22.2457	8.5446	6.01381	7.04181	6.10947	2.14223	1.09911	0.00789285	0.0455813	up	yes
TraesCS2A02G046700	0.073087	0.123583	0.017454	0	0.01044	0	20.51	4.35825	0.00793226	0.0457762	up	yes
TraesCS2D02G565000	2.89226	12.8458	3.44694	1.88077	1.07958	2.23529	3.69251	1.8846	0.00805728	0.0463092	up	yes
TraesCS1A02G234600	0.117761	4.1863	0.316271	0.172601	0.160912	0.051436	12.0024	3.58526	0.00812059	0.0465888	up	yes
TraesCS5B02G029300	0.243513	0.216966	0.245743	0.07374	0.130663	0.013311	3.24381	1.69769	0.00836008	0.0476667	up	yes
TraesCS5A02G063900	0.014537	0.048223	0.060095	0	0	0	409.517	8.67778	0.00842264	0.0479305	up	yes
TraesCS3B02G285600	0.185033	0.12318	0.331622	0.045571	0.026027	0.113115	3.46394	1.79241	0.00861998	0.0487704	up	yes
TraesCS1A02G203700	0.137341	0.13872	0.191333	0	0.032477	0.0232	8.39474	3.06949	0.00862587	0.0487948	up	yes
TraesCS2B02G522300	0.830362	1.79332	1.06683	0.390917	0.629441	0.289494	2.81751	1.49442	0.00870174	0.0491023	up	yes
TraesCS2B02G023600	0.562115	0.140931	0.496024	0.155093	0.095076	0.166483	2.87787	1.525	0.00887338	0.0498525	up	yes
TraesCS6B02G157700	0.620376	0.496928	0.935016	0.422197	0.281883	0.25196	2.14669	1.10211	0.008891	0.0499374	up	yes

## Sheet: S4
Table S4. Differentially expressed genes between CK2 and T2
gene_id	FPKM.T2_1	FPKM.T2_2	FPKM.T2_3	FPKM.CK2_1	FPKM.CK2_2	FPKM.CK2_3	fc	log2(fc)	pval	qval	regulation	significant
TraesCS3D02G035900	0	0.044475	0.083738	0.84066	1.20704	3.46578	0.0232544	-5.42635	1.30136e-05	0.000201264	down	yes
TraesCS1D02G222600	0.451068	0.667179	0.321412	1.64537	0.813189	1.24382	0.388847	-1.36272	6.30588e-05	0.000813996	down	yes
TraesCS3A02G146800	0.049651	0.028552	0	0.111688	0.144951	0.232245	0.159962	-2.6442	0.00498228	0.0330547	down	yes
TraesCS2D02G064900	1.23403	1.34886	0.739651	5.03652	6.13702	4.76077	0.208515	-2.26178	1.17708e-24	1.9287e-22	down	yes
TraesCS5A02G213900	3.13629	4.08744	4.1474	8.19748	6.48716	9.43404	0.471466	-1.08478	1.49013e-10	5.89611e-09	down	yes
TraesCS2B02G078700	0.167077	0.153177	0.270407	0.852526	0.898463	0.655745	0.24542	-2.02667	6.3417e-06	0.000106488	down	yes
TraesCS7A02G380100	0.458879	0.583851	0.180046	0.838783	1.14449	1.52462	0.348578	-1.52045	0.000470917	0.004656	down	yes
TraesCS5D02G538500	0.61627	1.19382	0.650649	1.95945	1.85818	1.88224	0.431718	-1.21184	0.000270147	0.00288204	down	yes
TraesCS1D02G266300	0.822116	0.808732	0.669188	2.89543	1.58739	1.44987	0.387688	-1.36703	6.15338e-06	0.000103712	down	yes
TraesCS3A02G235700	0.220348	0.135025	0.13148	0.404815	0.798704	0.578564	0.273193	-1.87201	0.000253838	0.00272918	down	yes
TraesCS5A02G172700	3.44766	4.74818	3.42697	9.38052	9.39006	9.64717	0.408998	-1.28983	7.85294e-20	8.52102e-18	down	yes
TraesCS5D02G177200	6.45114	7.21551	5.95133	12.6854	12.3452	15.0504	0.489458	-1.03074	7.67842e-18	6.95698e-16	down	yes
TraesCS5B02G170100	4.11736	5.58499	3.30554	8.5723	9.45053	8.22352	0.495608	-1.01273	4.11241e-08	1.1056e-06	down	yes
TraesCS1D02G168700	0.301707	0.568217	0.378065	1.4276	1.51549	1.84452	0.26067	-1.9397	8.20108e-10	2.92718e-08	down	yes
TraesCS1B02G186300	0.27329	0.210211	0.262204	0.773868	1.35268	1.00759	0.23793	-2.07139	7.68177e-08	1.96408e-06	down	yes
TraesCS1A02G171000	0.068827	0.112024	0.17483	0.465316	0.463429	0.628398	0.228419	-2.13024	3.89343e-05	0.000529142	down	yes
TraesCS3A02G494700	0.048323	0.026955	0.029339	0.226641	0.171473	0.197078	0.17577	-2.50824	0.00117715	0.010112	down	yes
TraesCS2A02G305000	0.59938	0.488623	0.437523	1.26704	0.977172	1.00212	0.469923	-1.0895	1.44607e-07	3.46505e-06	down	yes
TraesCS2A02G255100	0.866204	1.35945	1.3404	2.25514	2.6832	2.44604	0.482918	-1.05015	6.43121e-07	1.36327e-05	down	yes
TraesCS2D02G255500	0.441117	0.114006	0.14435	0.699213	0.724165	0.490014	0.365567	-1.45179	0.0030971	0.0224258	down	yes
TraesCS1A02G159600	0.258446	0.39691	0.298964	0.658456	0.825204	0.526447	0.474761	-1.07473	0.00524495	0.0344821	down	yes
TraesCS5A02G276400	0	0	0.023662	0.143972	0.063665	0.264669	0.0500989	-4.31908	0.00109134	0.00948105	down	yes
TraesCS4B02G377500	0.457384	0.571189	0.824504	1.78164	1.49137	1.26902	0.407984	-1.29342	0.000965311	0.00856845	down	yes
TraesCS7B02G265200	0.319504	0.608605	0.178961	1.06955	1.32654	1.17542	0.309972	-1.68979	8.87578e-06	0.000143782	down	yes
TraesCS7A02G424100	11.0008	14.925	15.8439	31.8146	32.7034	41.0073	0.395826	-1.33706	5.76118e-25	9.67402e-23	down	yes
TraesCS7D02G417400	15.2261	14.4704	18.8789	32.2617	32.2563	39.4013	0.467435	-1.09716	7.96894e-22	1.01832e-19	down	yes
TraesCS7A02G477100	0.228328	0.808638	0.462781	2.69433	3.74918	5.27693	0.12796	-2.96624	2.31664e-17	2.00937e-15	down	yes
TraesCS1B02G115900	5.09868	8.12875	8.81187	20.8899	16.1954	18.2771	0.398092	-1.32883	4.9541e-16	3.75938e-14	down	yes
TraesCS2D02G108200	10.4238	13.0413	16.6084	26.7756	27.1601	30.8227	0.472797	-1.08071	2.62741e-15	1.87641e-13	down	yes
TraesCS7A02G339600	5.07207	4.93712	6.38561	10.6274	10.9431	11.4466	0.496557	-1.00997	3.47149e-14	2.2059e-12	down	yes
TraesCS7B02G379100	0.158523	0.575334	0.474429	2.26512	3.28695	3.83613	0.128703	-2.95789	4.46773e-14	2.79524e-12	down	yes
TraesCS2A02G572500	1.13308	2.20122	1.61833	8.01819	4.86829	4.60588	0.283131	-1.82046	5.1892e-13	2.85536e-11	down	yes
TraesCS6B02G333800	0.819668	0.759842	0.508572	2.55765	2.13202	2.25452	0.300694	-1.73363	1.94489e-11	8.71361e-10	down	yes
TraesCS7D02G442300	0.643668	0.640282	0.509532	1.66274	1.92473	1.76633	0.334992	-1.5778	4.72863e-09	1.50885e-07	down	yes
TraesCS1D02G096400	2.01106	1.99864	2.04958	4.27354	3.44032	5.01236	0.476126	-1.07058	1.2604e-08	3.71815e-07	down	yes
TraesCS2A02G502100	1.49209	1.64227	1.31814	2.73701	3.95577	3.43646	0.439569	-1.18584	5.70636e-08	1.49602e-06	down	yes
TraesCS7A02G211200	2.63599	2.4517	3.54086	7.43416	7.37975	4.35767	0.45007	-1.15178	1.80593e-07	4.26785e-06	down	yes
TraesCS6A02G305600	0.925077	1.05521	0.7509	2.64712	2.25913	1.95634	0.397982	-1.32922	3.77695e-07	8.40987e-06	down	yes
TraesCS7B02G251200	1.91331	1.84743	2.4787	4.52649	4.54796	3.59068	0.492648	-1.02137	5.66948e-07	1.21575e-05	down	yes
TraesCS4A02G127900	0.021941	0.098214	0.065862	0.419932	0.671882	0.517782	0.115568	-3.11319	2.37694e-06	4.44804e-05	down	yes
TraesCS4A02G076700	0.035726	0.108083	0.080397	0.512223	0.501965	0.619983	0.137199	-2.86566	5.06462e-06	8.72798e-05	down	yes
TraesCS3B02G272100	0.269581	0.154762	0.435539	0.817115	1.2134	1.058	0.278413	-1.8447	8.68699e-06	0.000141258	down	yes
TraesCS2B02G124300	0	0.019264	0	0.234555	0.109323	0.56184	0.0212693	-5.55508	1.02293e-05	0.000162819	down	yes
TraesCS2D02G107800	0	0	0	0.156477	0.146912	0.228373	0.000564162	-10.7916	1.09858e-05	0.000173232	down	yes
TraesCS7D02G464600	0.941876	2.16198	1.46204	2.05221	4.29815	5.55755	0.383434	-1.38295	3.28318e-05	0.000455576	down	yes
TraesCS3B02G209900	0.465695	0.292116	0.329664	1.31616	0.921612	0.87351	0.349526	-1.51653	8.42694e-05	0.00104913	down	yes
TraesCS4B02G176900	0	0.051304	0	0.283124	0.285655	0.355157	0.0555277	-4.17065	0.000164262	0.00188638	down	yes
TraesCS6B02G354600	0.07287	0.101509	0.235724	0.821095	0.577093	0.47677	0.218726	-2.1928	0.000220162	0.00241863	down	yes
TraesCS3D02G459500	0.016821	0	0.054897	0.220926	0.285873	0.215067	0.0993508	-3.33132	0.000509856	0.0049888	down	yes
TraesCS4B02G232800	0	0	0.029628	0.156877	0.042283	0.474743	0.0439648	-4.50751	0.000914015	0.00817654	down	yes
TraesCS5A02G148600	0.021708	0.249589	0.105628	0.454249	0.706703	0.625364	0.211007	-2.24464	0.00105219	0.00919494	down	yes
TraesCS4D02G102600	0.344683	0.412866	0.56687	0.895518	1.00724	1.00139	0.456045	-1.13275	0.00173438	0.0139866	down	yes
TraesCS3D02G244200	0.211084	0.150093	0.110026	0.308825	0.358474	0.374807	0.452164	-1.14508	0.00198749	0.0156352	down	yes
TraesCS1D02G217500	0.733029	0.405949	0.53627	1.14093	1.00018	1.31481	0.484747	-1.0447	0.00201736	0.0158181	down	yes
TraesCS3B02G154200	0.027131	0.183752	0.152948	0.27033	0.646439	0.625405	0.235921	-2.08363	0.00237152	0.0180941	down	yes
TraesCS7B02G274500	0.467326	0.733788	0.819211	1.48266	1.121	1.5929	0.481423	-1.05462	0.00268538	0.0200226	down	yes
TraesCS4D02G234000	0.165838	0.166969	0.073811	0.437552	0.283363	0.673222	0.291663	-1.77763	0.00361544	0.0254998	down	yes
TraesCS1A02G104300	0.137761	0.876268	0.717825	1.20301	1.28513	1.96036	0.389311	-1.361	0.00427936	0.0292875	down	yes
TraesCS1B02G331200	0	0.058563	0	0.444516	0.071791	0.200693	0.0816778	-3.61391	0.00520992	0.0342823	down	yes
TraesCS3D02G137100	0	0	0.03251	0.228403	0.176434	0.075149	0.0677311	-3.88404	0.00593084	0.0380345	down	yes
TraesCS1A02G318900	0.027941	0.048581	0.030257	0.150071	0.162724	0.338848	0.163861	-2.60945	0.0060272	0.0385178	down	yes
TraesCS2A02G108100	5.54797	12.0479	16.8862	25.1217	30.4451	28.9091	0.408188	-1.29269	0.00640579	0.040395	down	yes
TraesCS5D02G013400	0.008708	0.012724	0	0.034326	0.101912	0.126155	0.081679	-3.61389	0.00190512	0.0151086	down	yes
TraesCS6A02G166000	0.034133	0.007675	0.091063	0.167196	0.233273	0.167863	0.233791	-2.09671	0.00461166	0.0310701	down	yes
TraesCS2D02G333300	0.046392	0.0092	0.01066	0.152459	0.132341	0.07974	0.181741	-2.46004	0.00488206	0.0325545	down	yes
TraesCS6D02G364900	3.81961	4.73154	4.05348	12.2092	13.2031	11.1536	0.34471	-1.53655	2.68035e-49	2.26914e-46	down	yes
TraesCS2A02G235900	4.14915	5.03672	4.21037	11.217	11.167	10.0947	0.412462	-1.27767	1.73161e-44	1.08255e-41	down	yes
TraesCS6B02G419000	4.79028	5.89813	4.80671	13.539	15.7118	12.8114	0.368386	-1.44071	3.59432e-41	1.82573e-38	down	yes
TraesCS2B02G260800	4.27742	4.82418	3.594	9.57163	10.147	9.45732	0.435139	-1.20045	1.10511e-34	3.78964e-32	down	yes
TraesCS6A02G380200	3.89353	5.41054	3.90412	12.9365	12.6683	11.0135	0.360699	-1.47113	2.5059e-33	7.6277e-31	down	yes
TraesCS2D02G241800	4.74544	5.49876	4.13173	10.1862	9.97846	8.60722	0.499652	-1.001	1.59879e-21	2.00211e-19	down	yes
TraesCS4D02G234700	0.571698	0.332979	0.353915	1.29823	1.18758	1.59663	0.308294	-1.69762	1.0014e-10	4.05104e-09	down	yes
TraesCS3D02G263700	0.50329	0.588372	0.453543	1.40819	0.885665	0.869689	0.488441	-1.03375	0.00416819	0.0286524	down	yes
TraesCS7D02G530700	0.063189	0.232597	0.586421	8.69449	4.60208	4.59836	0.0492993	-4.34229	3.38569e-07	7.58649e-06	down	yes
TraesCS2D02G116600	0.258081	0.358581	0.44712	1.19553	1.34584	0.89756	0.309335	-1.69276	2.56377e-06	4.75715e-05	down	yes
TraesCS6B02G427200	0.123765	0.57306	0.695965	1.71175	1.24293	1.44051	0.31689	-1.65795	0.000205484	0.00228019	down	yes
TraesCS6D02G275400	0	0	0.063224	0.369456	0.237298	0.286986	0.0707409	-3.82131	0.000315337	0.0032924	down	yes
TraesCS7A02G204900	0.156033	0.128096	0.158875	0.471006	0.39491	0.40939	0.347371	-1.52545	0.00374478	0.0262525	down	yes
TraesCS2A02G118600	0.16551	0.376751	0.307766	0.675249	1.04651	0.454824	0.390533	-1.35648	0.00439531	0.0299176	down	yes
TraesCS4A02G122700	0	0	0	0.031126	0.275553	0	0.000978222	-9.99755	0.00718297	0.0441417	down	yes
TraesCS7B02G466500	0.070943	0.189104	0.300761	0.786901	0.607832	0.342768	0.322767	-1.63143	0.00777322	0.0470468	down	yes
TraesCS5D02G404500	1.19026	1.07803	1.20284	2.33848	2.57064	2.33573	0.479118	-1.06155	6.41896e-12	3.05255e-10	down	yes
TraesCS5A02G395200	0.846951	0.565323	0.79266	1.71634	1.73852	1.51771	0.44342	-1.17325	8.18036e-09	2.49656e-07	down	yes
TraesCS5B02G400000	1.67789	1.38776	1.55593	3.61155	3.36983	2.30924	0.497447	-1.00739	2.28876e-08	6.45205e-07	down	yes
TraesCS2B02G194200	2.00111	3.71672	3.81177	11.3681	12.4147	11.4632	0.270374	-1.88697	2.74663e-10	1.05344e-08	down	yes
TraesCS2A02G168200	1.75287	3.9034	3.78551	8.75858	12.1423	9.12034	0.314504	-1.66885	2.34838e-05	0.000338101	down	yes
TraesCS2D02G175600	0.437443	1.56654	1.82778	4.96984	5.24784	4.20704	0.265639	-1.91246	0.00136355	0.0114553	down	yes
TraesCS4B02G091100	0.890787	1.18173	1.01012	3.05846	2.89829	2.14982	0.380265	-1.39492	3.41464e-15	2.40481e-13	down	yes
TraesCS4D02G088200	3.01172	2.69664	2.33384	6.1166	4.88596	5.1217	0.498764	-1.00357	1.26874e-14	8.43804e-13	down	yes
TraesCS6B02G251600	0.798888	1.04451	0.402622	1.05301	2.566	2.51979	0.365873	-1.45059	0.000586981	0.00561567	down	yes
TraesCS5A02G090500	0.286039	0.380416	0.289102	0.728283	0.748514	0.972126	0.390195	-1.35773	1.06103e-07	2.61944e-06	down	yes
TraesCS5B02G096200	0.286789	0.231909	0.313545	0.495945	0.618425	0.637533	0.475051	-1.07385	0.000149325	0.00173629	down	yes
TraesCS5A02G358100	0.099906	0.156087	0.12897	0.310606	0.316561	0.392995	0.377355	-1.40601	0.00156868	0.0128777	down	yes
TraesCS2D02G545400	2.17843	2.3418	2.32843	5.23376	4.87604	4.15899	0.479975	-1.05897	5.73562e-09	1.80397e-07	down	yes
TraesCS1B02G113600	0.797949	0.85418	0.56175	2.12811	2.88572	3.07152	0.273813	-1.86873	1.04267e-08	3.12693e-07	down	yes
TraesCS5A02G424000	1.13727	1.02383	2.28295	2.9881	5.24682	4.1928	0.357591	-1.48362	8.23699e-05	0.00102879	down	yes
TraesCS3A02G376700	0.036117	0	0	0.409065	0.212902	0.339333	0.037571	-4.73424	0.000156531	0.00180885	down	yes
TraesCS3D02G429800	0.857981	0.865738	0.763287	1.39545	1.93594	2.83586	0.40326	-1.31022	0.000183974	0.00207407	down	yes
TraesCS2A02G577900	1.59876	1.44158	2.32238	3.9229	4.23445	3.26027	0.469687	-1.09023	0.000235258	0.0025599	down	yes
TraesCS5D02G432600	0.320752	0.066582	0.260774	1.30603	0.753648	0.707265	0.234232	-2.09399	0.000736405	0.00680722	down	yes
TraesCS1A02G013900	0.038212	0	0.043967	0.569893	0.033964	0.494893	0.0747932	-3.74095	0.00186256	0.0148304	down	yes
TraesCS3D02G483000	0.871404	0.868728	2.51974	1.93874	3.81598	2.86834	0.49401	-1.01739	0.00828637	0.0495183	down	yes
TraesCS4B02G157800	0.475798	0.60392	0.46384	1.27951	1.27021	1.00551	0.434165	-1.20368	3.97003e-07	8.80842e-06	down	yes
TraesCS5D02G484500	0.250648	0.122437	0.309002	0.656442	1.02069	0.581169	0.302035	-1.72721	0.000136387	0.00160203	down	yes
TraesCS2D02G409900	2.14941	2.50017	2.63719	5.02998	5.09696	5.33451	0.471286	-1.08532	4.27076e-10	1.59144e-08	down	yes
TraesCS5A02G043800	0.905463	1.51853	0.689818	2.12984	3.1812	2.79088	0.384329	-1.37958	2.9198e-07	6.64143e-06	down	yes
TraesCS7D02G157800	0.31082	0.406098	0.354179	0.774982	1.16372	1.03952	0.359643	-1.47536	2.92144e-06	5.34186e-05	down	yes
TraesCS7B02G061600	0.111611	0.10543	0.017518	0.59025	0.496972	0.432288	0.154365	-2.69558	7.07756e-06	0.000117509	down	yes
TraesCS7A02G157300	0.146407	0.045731	0.128477	0.918957	0.398059	0.274319	0.201475	-2.31132	0.000192242	0.00215473	down	yes
TraesCS2A02G109600	0.279253	0.353673	0.422826	0.735311	0.593184	0.947224	0.46392	-1.10805	0.0019081	0.0151278	down	yes
TraesCS1B02G354500	0.199304	0.277862	0.246017	0.650544	0.650129	0.407943	0.423257	-1.24039	0.00706847	0.0436129	down	yes
TraesCS7B02G073600	1.60676	1.55809	2.10837	3.60303	4.03511	4.71393	0.42691	-1.228	5.41275e-08	1.4241e-06	down	yes
TraesCS7D02G169500	1.13137	1.35905	0.994242	3.10603	2.12397	3.07886	0.419391	-1.25363	5.86755e-06	9.93267e-05	down	yes
TraesCS2D02G154100	1.37869	1.42758	1.76131	3.74407	2.71466	2.96734	0.484568	-1.04523	8.06777e-06	0.000132061	down	yes
TraesCS6A02G233100	0.235608	0.249792	0.128953	0.648341	0.722627	0.526393	0.323793	-1.62685	0.000131164	0.00154851	down	yes
TraesCS6B02G330900	0	0.0168659	0.0400029	0.230358	0.360997	0.0588189	0.0874671	-3.51512	0.000729448	0.00675886	down	yes
TraesCS2A02G335400	0.287866	0.165781	0.366132	0.758638	0.592821	0.529051	0.435935	-1.19782	0.000667688	0.00627116	down	yes
TraesCS3A02G473500	0.057338	0.087514	0.155055	0.266973	0.283331	0.327297	0.341735	-1.54905	0.00254517	0.0191724	down	yes
TraesCS7B02G104600	3.46434	2.71621	3.01681	9.52848	8.1497	9.03212	0.344337	-1.5381	2.21831e-35	8.23225e-33	down	yes
TraesCS7D02G201000	5.52802	4.87467	5.02703	11.7321	10.0533	11.3962	0.465009	-1.10467	1.24104e-24	2.01724e-22	down	yes
TraesCS7A02G197900	1.79605	2.23761	2.3663	5.64524	6.34269	6.32308	0.349515	-1.51658	4.08045e-22	5.4365e-20	down	yes
TraesCS6D02G275900	0.066458	0.034889	0.089764	0.461657	0.295359	0.137302	0.213695	-2.22638	0.00120386	0.0103077	down	yes
TraesCS6A02G295300	0.068048	0.145519	0.069465	0.137027	0.344022	0.492847	0.290618	-1.7828	0.00773546	0.0468628	down	yes
TraesCS2B02G369100	3.13986	3.09714	2.88093	6.36492	6.88729	6.58589	0.459617	-1.1215	3.97448e-12	1.9447e-10	down	yes
TraesCS3A02G239200	0.031471	0	0	0.561891	0.806873	0.667192	0.0154576	-6.01554	2.64864e-10	1.0173e-08	down	yes
TraesCS2A02G350900	0.140142	0.340047	0.277552	0.790862	1.56675	2.4916	0.156261	-2.67797	1.54824e-07	3.69866e-06	down	yes
TraesCS2D02G349400	3.16796	5.54232	5.10817	7.81984	10.107	9.9947	0.494904	-1.01478	1.11943e-06	2.26109e-05	down	yes
TraesCS7A02G353900	0.245126	0.088649	0.105608	1.15988	0.252328	0.384637	0.24453	-2.03192	0.00107071	0.00932779	down	yes
TraesCS2B02G600200	3.25725	6.10894	5.39271	18.6085	24.4267	25.5392	0.215224	-2.21609	2.44985e-14	1.57894e-12	down	yes
TraesCS2A02G329000	1.97983	2.64044	2.18759	5.51559	5.21331	4.85854	0.436753	-1.19511	1.76623e-13	1.03493e-11	down	yes
TraesCS2B02G600100	0.236499	0.464307	0.545258	1.88004	2.22114	1.87361	0.208553	-2.26151	1.96613e-11	8.79906e-10	down	yes
TraesCS7D02G245000	0.205416	0.337525	0.400626	1.24497	1.34375	1.92591	0.209002	-2.25841	3.61991e-10	1.36266e-08	down	yes
TraesCSU02G036600	0.927138	1.51571	1.30433	17.572	6.20042	4.65951	0.131795	-2.92364	2.64358e-06	4.88738e-05	down	yes
TraesCS2D02G594400	0	0	0	0.132267	0.039904	0.035545	0.00144428	-9.43543	0.000300746	0.00315832	down	yes
TraesCS3B02G484000	0.099398	0.030636	0.112046	0.453328	0.28945	0.250464	0.243727	-2.03666	0.00210552	0.0164285	down	yes
TraesCS3A02G447800	0.042744	0	0	0.288826	0.167158	0.08546	0.0789445	-3.66302	0.00335361	0.0239409	down	yes
TraesCS2B02G600000	0.128729	0.292971	0.247586	0.870953	0.28783	0.806061	0.340631	-1.55372	0.00621901	0.0394498	down	yes
TraesCS2D02G293200	0.577597	0.808981	0.454944	1.18167	1.98325	1.43131	0.400659	-1.31955	8.04396e-06	0.000131778	down	yes
TraesCS3D02G020600	1.5326	1.36105	1.38108	2.74956	5.5384	3.73848	0.355444	-1.49231	1.91974e-09	6.51989e-08	down	yes
TraesCS5D02G316000	0.580264	0.58915	0.273656	1.10288	1.68951	1.28536	0.353889	-1.49863	6.33348e-06	0.00010644	down	yes
TraesCS3D02G223900	0.916904	1.47464	1.03802	3.67652	3.14353	3.40989	0.335248	-1.5767	1.00059e-12	5.322e-11	down	yes
TraesCS3B02G258600	0.793351	0.615927	0.501972	1.85855	1.5324	1.61458	0.381828	-1.389	2.06224e-10	8.03754e-09	down	yes
TraesCS7D02G398900	0	0	0	0.036094	0.162046	0.085554	0.00105748	-9.88516	0.000309988	0.00324322	down	yes
TraesCS1B02G322500	0.429383	0.596365	0.280038	1.20016	0.924607	0.931191	0.427293	-1.2267	0.000507295	0.00496494	down	yes
TraesCS7B02G230600	0.039829	0.034855	0.037016	0.271763	0.273221	0.095717	0.17434	-2.52002	0.00141389	0.011822	down	yes
TraesCS1A02G365200	0.112584	0.1634	0.183435	0.315555	0.557399	0.381232	0.366309	-1.44887	0.00781919	0.0472666	down	yes
TraesCS2A02G154900	1.5199	1.75375	2.13869	3.37449	4.31475	3.28387	0.493236	-1.01965	1.3254e-07	3.20494e-06	down	yes
TraesCS3A02G476000	0.242918	0.825676	0.425606	1.56811	1.53973	1.29316	0.339513	-1.55846	2.20177e-06	4.15468e-05	down	yes
TraesCS1D02G218800	0.531708	0.64823	0.672989	1.49507	1.4913	1.92157	0.377536	-1.40531	1.54263e-06	3.01812e-05	down	yes
TraesCS5B02G164600	1.0256	2.08253	1.74836	4.16025	4.67169	4.89918	0.353685	-1.49946	4.77211e-09	1.52153e-07	down	yes
TraesCS3A02G300900	0.351722	0.539128	0.446404	1.45806	0.956399	2.04035	0.300182	-1.73609	1.47311e-05	0.000224578	down	yes
TraesCS1B02G264600	0	0	0	0.026885	0.054612	0.021844	0.00290301	-8.42823	0.00459208	0.0309575	down	yes
TraesCS4B02G019800	1.19126	1.31269	0.894338	2.32762	2.44338	2.49774	0.467521	-1.0969	8.70354e-05	0.00107851	down	yes
TraesCS4A02G293900	1.55125	1.37911	0.978381	3.30024	2.10162	3.28079	0.450178	-1.15143	0.000196467	0.00219361	down	yes
TraesCS3D02G104500	1.67951	1.74367	2.14339	3.57599	3.66842	4.02632	0.493896	-1.01772	4.74517e-10	1.75775e-08	down	yes
TraesCS3B02G120000	0.065902	0.114826	0.164818	0.466303	0.383506	0.26811	0.309098	-1.69387	0.000293385	0.003093	down	yes
TraesCS4A02G441800	0	0	0	0.29975	0.253945	0.256554	0.000370257	-11.3992	1.64829e-05	0.00024836	down	yes
TraesCS6A02G126500	0.248782	0.205052	0.157902	0.786853	0.850478	1.15473	0.219098	-2.19035	1.037e-08	3.11222e-07	down	yes
TraesCS5B02G043700	0.073704	0.077856	0.017977	0.216752	0.31268	0.268731	0.212409	-2.23508	0.0012888	0.0109219	down	yes
TraesCS5D02G173900	1.95406	1.71981	1.45373	6.37084	7.81653	3.97428	0.282331	-1.82454	1.88271e-15	1.36618e-13	down	yes
TraesCS4D02G220500	5.03138	4.25928	7.22769	16.9874	12.3524	11.1273	0.408191	-1.29268	4.64207e-05	0.000619186	down	yes
TraesCS2A02G415800	0.196736	0.0887253	0.2286	0.471855	0.479427	0.514315	0.350752	-1.51148	0.00627405	0.0397161	down	yes
TraesCS3A02G391200	0	0	0	1.22321	0	0	0.000245256	-11.9934	4.88144e-08	1.29479e-06	down	yes
TraesCS2B02G386400	0	0.073331	0.251016	0.762452	1.00552	0.572842	0.138562	-2.8514	0.000490507	0.00482504	down	yes
TraesCS5D02G243500	0.67679	0.557645	0.481499	0.955691	1.04661	1.51838	0.487387	-1.03686	0.00228575	0.01757	down	yes
TraesCS2A02G369200	0.150245	0.193953	0.545064	1.18636	1.37419	0.707869	0.272077	-1.87791	0.00288903	0.0212371	down	yes
TraesCS5B02G502700	33.4146	34.9163	27.8044	66.2586	73.2725	59.7045	0.482521	-1.05134	6.95267e-32	1.94847e-29	down	yes
TraesCS7D02G085000	1.03761	1.22793	1.30993	9.58433	10.6646	9.44999	0.120391	-3.05421	1.42748e-72	4.83393e-69	down	yes
TraesCS4A02G388700	1.76189	1.21856	1.86143	6.10028	5.75169	5.26053	0.282944	-1.82141	2.01726e-18	1.94019e-16	down	yes
TraesCS4A02G389100	2.61683	2.14013	3.83074	7.37408	6.43903	9.03474	0.375865	-1.41171	5.57618e-11	2.34326e-09	down	yes
TraesCS4A02G388900	2.59682	3.126	3.10512	6.77889	5.96211	6.04366	0.469955	-1.08941	3.77036e-10	1.41667e-08	down	yes
TraesCS7D02G085100	0.714294	0.676821	1.15986	3.3759	2.31219	2.56054	0.30926	-1.69311	3.96086e-08	1.06946e-06	down	yes
TraesCS7D02G085200	0.469261	0.968825	0.781798	1.65272	1.55267	1.4356	0.478321	-1.06395	0.00357618	0.0252777	down	yes
TraesCS2B02G181900	0.403897	0.432876	0.421873	0.853881	0.793295	0.90909	0.492377	-1.02217	0.00246967	0.018699	down	yes
TraesCS4D02G238800	11.1882	11.6592	12.6539	24.2565	26.4183	24.3053	0.473477	-1.07864	8.37081e-32	2.32984e-29	down	yes
TraesCS7D02G363000	0.52036	0.429085	0.872729	1.26634	1.15652	1.29964	0.489503	-1.03061	0.00297535	0.0217535	down	yes
TraesCS1D02G184500	4.4017	3.08919	3.03867	10.063	7.78386	10.5962	0.370198	-1.43363	4.42178e-18	4.11646e-16	down	yes
TraesCS1B02G199600	3.94353	2.60265	2.61612	7.92077	6.84436	8.60877	0.391988	-1.35112	2.41734e-15	1.73247e-13	down	yes
TraesCS3B02G125200	0.113514	0.23534	0.231026	0.39407	0.766746	0.575635	0.333946	-1.58232	0.00126459	0.0107461	down	yes
TraesCS2B02G341100	1.84231	2.15291	2.04699	5.76965	5.29456	5.46831	0.365474	-1.45216	4.46185e-20	4.92027e-18	down	yes
TraesCS2A02G343500	2.37179	2.98486	3.13759	6.07179	5.86116	6.22764	0.467729	-1.09625	3.15071e-11	1.37595e-09	down	yes
TraesCS3B02G392200	1.00593	1.06112	1.36591	2.62237	2.66541	3.14192	0.407245	-1.29603	9.44687e-05	0.00116106	down	yes
TraesCS3D02G353800	0	0	0	0.157853	0.112052	0.155516	0.000705183	-10.4697	0.000894967	0.00803888	down	yes
TraesCS3D02G353700	0.797263	0.447486	0.443053	1.27621	1.15062	1.49953	0.429865	-1.21805	0.00791167	0.0477107	down	yes
TraesCS2B02G356200	0.255329	0.441703	0.280863	1.08965	1.05031	0.835327	0.328672	-1.60528	6.50419e-06	0.000108946	down	yes
TraesCS2D02G337000	0.453066	0.567884	0.581271	1.07289	1.19145	1.20627	0.461653	-1.11512	0.000116804	0.00139848	down	yes
TraesCS6A02G110200	0.349476	0.15447	0.277967	0.541572	0.552401	0.674016	0.442261	-1.17703	0.00414942	0.0285403	down	yes
TraesCS4A02G038500	0.792301	1.20286	1.23188	3.81561	4.27797	3.50893	0.278133	-1.84615	3.1828e-22	4.2615e-20	down	yes
TraesCS4D02G266700	2.0051	2.47832	3.09785	6.53693	7.15421	7.01644	0.366111	-1.44965	6.32722e-22	8.25403e-20	down	yes
TraesCS4B02G267200	1.54285	1.72966	2.27414	3.79218	4.60304	4.17649	0.441201	-1.18049	8.20356e-12	3.8472e-10	down	yes
TraesCS7B02G387100	0.229047	0.176054	0.191791	0.502347	0.339341	0.473944	0.453692	-1.14021	0.00351493	0.0249185	down	yes
TraesCS1D02G236900	0.883649	1.3314	2.25753	2.83882	3.44296	4.00282	0.434881	-1.20131	1.85308e-05	0.000275225	down	yes
TraesCS5A02G385900	1.41394	1.82737	1.54546	4.61205	3.38054	3.58427	0.413477	-1.27412	2.05978e-08	5.86142e-07	down	yes
TraesCS5B02G390900	1.86778	1.92499	1.4802	4.87408	3.92859	4.07742	0.409389	-1.28845	3.01082e-08	8.29196e-07	down	yes
TraesCSU02G198000	2.03395	2.18648	1.56479	5.34474	4.43661	4.49724	0.405168	-1.30341	5.29277e-08	1.3957e-06	down	yes
TraesCS5D02G395800	3.15952	2.33878	2.44557	5.99236	5.77213	5.52336	0.459506	-1.12184	1.15753e-07	2.83529e-06	down	yes
TraesCSU02G208600	2.74845	3.18887	2.17404	8.12354	6.09246	5.74952	0.406268	-1.2995	5.37637e-07	1.16008e-05	down	yes
TraesCS5A02G386000	4.11644	3.58824	2.75362	9.20963	6.38413	5.44838	0.497017	-1.00863	2.11006e-05	0.000307714	down	yes
TraesCS4A02G217100	0.359298	0.372913	0.31304	1.21431	0.985631	1.2244	0.305241	-1.71198	7.88036e-05	0.000988659	down	yes
TraesCS5D02G395900	1.31607	0.657436	0.360303	2.93832	2.57588	1.73203	0.322072	-1.63454	0.000237808	0.00258177	down	yes
TraesCS3B02G540000	0.915392	1.07535	1.11451	2.56254	1.83194	1.95953	0.488708	-1.03296	0.00112021	0.00969249	down	yes
TraesCS5A02G175900	0	0.022973	0	0.103945	0.193431	0.446517	0.0308821	-5.01708	0.00159843	0.0130652	down	yes
TraesCS3B02G095400	0.023913	0.209222	0.16804	0.479271	0.834943	0.443675	0.228214	-2.13154	0.00544893	0.0355796	down	yes
TraesCS2B02G143800	1.34698	0.750432	0.931728	1.86494	2.07337	2.57888	0.464792	-1.10534	0.00593955	0.0380754	down	yes
TraesCS5B02G172000	0	0	0	0	0.138702	0.227066	0.000820192	-10.2518	0.00762329	0.0462842	down	yes
TraesCS4D02G055000	0.199769	0.247672	0.5462	0.72394	1.17161	1.2053	0.320441	-1.64187	4.64989e-06	8.08992e-05	down	yes
TraesCS4B02G054900	0.065048	0.043501	0.127542	0.251947	0.196681	1.26358	0.137887	-2.85844	6.55449e-06	0.000109721	down	yes
TraesCS1B02G204700	0.169619	0.246608	0.281355	0.297346	0.578824	0.537811	0.493346	-1.01933	0.00683598	0.0425238	down	yes
TraesCS7D02G203800	0.072017	0.512982	0.208917	1.05909	0.637112	1.03737	0.290432	-1.78373	0.00065588	0.00617562	down	yes
TraesCS1A02G418500	0	0	0	0.088931	0.084889	0	0.00172592	-9.17842	0.00591396	0.0379532	down	yes
TraesCS1D02G255000	0	0	0	0.079924	0.071343	0.071576	0.00134624	-9.53685	0.00163508	0.0133206	down	yes
TraesCS3B02G173900	0.515248	0.566353	0.835808	2.0181	1.43778	1.81787	0.363576	-1.45967	6.74832e-06	0.000112572	down	yes
TraesCS3A02G146600	0.086973	0.156393	0.123424	0.52281	0.690371	0.365913	0.232279	-2.10607	0.000672901	0.00630992	down	yes
TraesCS5B02G480300	0.186274	0.182869	0.059855	0.421804	0.627078	1.5372	0.165887	-2.59172	8.28826e-05	0.00103425	down	yes
TraesCS1B02G471000	0	0.036527	0	0.191945	0.503921	0.218822	0.0399338	-4.64624	0.00108276	0.0094146	down	yes
TraesCS6D02G344100	4.20371	4.77343	3.54941	12.125	11.4948	9.66465	0.376349	-1.40986	8.95061e-30	2.21105e-27	down	yes
TraesCS6A02G360600	2.58936	3.74688	2.86289	9.10094	8.91323	7.3189	0.363127	-1.46145	8.05607e-25	1.33892e-22	down	yes
TraesCS6B02G393500	4.6423	6.36628	4.81987	12.0713	13.4651	10.5766	0.438303	-1.19	9.19507e-21	1.08778e-18	down	yes
TraesCS5B02G094600	6.53667	7.98	5.28829	17.28	17.1079	15.3557	0.398141	-1.32865	2.67339e-28	5.6729e-26	down	yes
TraesCS5D02G100800	6.1978	6.77332	5.25436	13.1822	13.1715	12.1654	0.473153	-1.07962	6.99544e-26	1.25782e-23	down	yes
TraesCS3A02G200400	4.42825	5.54675	4.35479	11.2467	10.1601	9.31151	0.466489	-1.10009	1.22278e-24	1.99554e-22	down	yes
TraesCS3B02G224600	5.20825	6.1433	4.45138	12.2978	12.3064	10.3714	0.451826	-1.14616	1.8308e-22	2.50071e-20	down	yes
TraesCS3D02G203400	5.22235	6.12021	4.1727	10.4649	10.6315	10.3096	0.494023	-1.01735	5.08235e-18	4.70984e-16	down	yes
TraesCS6A02G355800	1.13881	1.0462	0.439165	2.22267	2.07211	2.63898	0.378463	-1.40177	0.000485071	0.00477851	down	yes
TraesCS6D02G338400	0.206683	0.293763	0.400122	1.93507	1.65871	1.39958	0.180353	-2.4711	0.000701777	0.00654895	down	yes
TraesCS7D02G442100	1.37158	1.53517	1.28281	3.40387	3.43959	3.20837	0.416796	-1.26259	4.44447e-15	3.09256e-13	down	yes
TraesCS3A02G118400	0.934598	0.766419	0.797953	2.23219	2.04069	1.8266	0.409702	-1.28735	2.57022e-09	8.55394e-08	down	yes
TraesCS4D02G007000	0.656168	1.00954	1.01622	2.75041	2.21386	2.18575	0.375094	-1.41468	7.9113e-07	1.64442e-05	down	yes
TraesCS4B02G008300	1.3658	1.56766	0.630214	2.98064	2.48373	2.52142	0.446252	-1.16407	0.000378947	0.00384924	down	yes
TraesCS4A02G306400	1.44883	0.652071	0.962654	2.24378	2.36821	2.239	0.44717	-1.1611	0.000461922	0.00457877	down	yes
TraesCS2D02G040000	0	0	0	0.276447	0.38258	0.799404	0.000205701	-12.2472	2.09045e-11	9.30932e-10	down	yes
TraesCS7B02G024500	2.15662	1.82648	2.15333	5.61615	3.81139	4.06834	0.454689	-1.13705	1.95803e-10	7.65429e-09	down	yes
TraesCS1D02G264100	6.48858	8.89244	7.35359	17.6885	19.1581	15.3864	0.435253	-1.20007	1.43407e-26	2.71046e-24	down	yes
TraesCS1B02G274600	9.0404	10.4331	7.92773	19.4521	21.0314	17.3135	0.474094	-1.07675	3.92986e-26	7.20965e-24	down	yes
TraesCS1D02G298400	7.40113	7.82224	5.53463	16.6204	15.6474	14.8646	0.440419	-1.18305	2.8915e-26	5.35303e-24	down	yes
TraesCS1B02G309300	7.52642	9.63647	6.42106	18.096	16.678	14.7998	0.475733	-1.07178	3.33532e-18	3.14829e-16	down	yes
TraesCS1B02G146200	5.65296	6.38965	4.96255	15.5074	15.5366	14.7009	0.371739	-1.42764	1.96177e-50	1.77153e-47	down	yes
TraesCS1D02G125300	6.87122	7.92486	6.58583	15.7936	15.3835	14.659	0.466486	-1.1001	3.47055e-34	1.14658e-31	down	yes
TraesCS1A02G129400	8.90679	10.9492	8.10597	21.5514	21.0867	19.1236	0.452739	-1.14325	8.42394e-29	1.87058e-26	down	yes
TraesCS1D02G229400	1.8114	2.27926	1.66271	4.35271	4.7737	4.28642	0.428945	-1.22113	1.91222e-12	9.74359e-11	down	yes
TraesCS1A02G227700	2.91223	2.97885	2.51454	6.02225	4.93319	5.87156	0.499531	-1.00135	1.11533e-10	4.48516e-09	down	yes
TraesCS1B02G242000	1.47607	2.10994	1.1791	3.59224	4.07542	3.3906	0.430909	-1.21455	1.17932e-08	3.49548e-07	down	yes
TraesCS2B02G300400	0.91902	1.14441	0.950351	3.44337	2.92814	2.95321	0.323203	-1.62949	4.3292e-15	3.02011e-13	down	yes
TraesCS2D02G282000	1.69988	2.12522	1.96256	3.83265	3.95886	4.54739	0.469059	-1.09216	8.42283e-10	3.00086e-08	down	yes
TraesCS2A02G283300	1.30804	1.92302	1.34576	3.6906	2.88761	2.9805	0.478812	-1.06247	1.93888e-07	4.55687e-06	down	yes
TraesCS1A02G144800	0.309386	0.316612	0.213706	0.523673	0.6242	0.537355	0.498273	-1.00499	0.00215685	0.0167455	down	yes
TraesCS4A02G204800	0.491732	0.621717	0.488854	1.28806	1.49021	1.40405	0.383114	-1.38416	0.000117151	0.00140202	down	yes
TraesCS4B02G242800	0.554485	0.999826	0.886383	1.71679	1.75467	1.97298	0.448292	-1.15749	0.000556172	0.0053664	down	yes
TraesCS4D02G214300	0.237257	0.206586	0.218045	0.386438	0.81868	0.515944	0.384581	-1.37864	0.00664133	0.0415803	down	yes
TraesCS2A02G458600	0.694118	0.640001	1.1221	7.5473	8.24766	11.2571	0.090796	-3.46123	1.9669e-44	1.2069e-41	down	yes
TraesCS2D02G459100	0.415702	0.267997	0.32981	5.79395	6.77855	10.3238	0.0442652	-4.49768	4.566e-41	2.30489e-38	down	yes
TraesCS2B02G480600	1.73657	1.96904	3.06645	14.8954	11.9141	19.3533	0.1467	-2.76906	9.20233e-38	3.81577e-35	down	yes
TraesCS2B02G480500	0.152203	0.437136	0.735699	5.80307	5.17395	6.85453	0.0743086	-3.75033	8.24604e-26	1.46646e-23	down	yes
TraesCS5B02G187200	0.259314	0.153116	0.563355	2.58306	1.98042	2.67799	0.134749	-2.89165	1.77562e-11	7.98461e-10	down	yes
TraesCS5D02G194700	0.26651	1.51302	1.39943	5.40082	5.41239	7.60177	0.172629	-2.53425	5.73578e-10	2.09415e-08	down	yes
TraesCS5A02G196700	0.245485	0.672059	1.05799	2.49533	2.78778	5.19168	0.188599	-2.40661	1.18168e-07	2.89007e-06	down	yes
TraesCS2D02G459200	2.20173	3.30386	6.56672	19.2258	25.1914	33.6563	0.154628	-2.69313	6.14396e-07	1.30852e-05	down	yes
TraesCS5A02G196400	0.495905	1.06868	2.6402	10.5371	9.94487	11.358	0.13206	-2.92073	1.63947e-05	0.000247342	down	yes
TraesCS2B02G480300	0.775479	1.31811	3.26221	8.68888	9.59675	19.2855	0.142551	-2.81045	6.19942e-05	0.000801909	down	yes
TraesCS5D02G453000	0	0	0	0.019104	0.031551	0.171113	0.00135277	-9.52987	0.00276503	0.0205096	down	yes
TraesCS2A02G458800	0.372798	1.35739	2.39591	4.68117	5.71543	7.00164	0.237156	-2.07609	0.00386656	0.0269597	down	yes
TraesCS4B02G218000	0.042952	0	0.03934	0.339573	0.338868	0.137769	0.100822	-3.31012	0.00723037	0.044382	down	yes
TraesCS6D02G137400	0.327108	0.303362	2.21165	1.58397	2.92627	5.23674	0.29159	-1.77799	0.00741763	0.0452825	down	yes
TraesCS6A02G148100	0	0.248261	0.40479	0.860965	0.966174	1.57826	0.191769	-2.38256	0.00817841	0.049021	down	yes
TraesCS7B02G290200	1.54632	2.28699	3.26056	8.3306	9.87909	13.39	0.224492	-2.15526	5.85095e-17	4.8972e-15	down	yes
TraesCS5B02G050600	2.41859	3.43922	2.60861	5.66525	4.75411	6.56163	0.498582	-1.0041	5.21592e-06	8.94132e-05	down	yes
TraesCS5B02G173600	1.56856	1.65187	1.44542	3.88461	2.71775	3.23487	0.474305	-1.07611	1.57993e-06	3.08219e-05	down	yes
TraesCS3B02G492900	6.37148	5.97554	5.77387	19.3292	15.4746	14.8576	0.364889	-1.45447	7.09628e-29	1.58442e-26	down	yes
TraesCS3A02G454300	7.05425	7.94735	7.17367	16.5359	15.1342	15.5047	0.470066	-1.08907	4.13395e-25	6.99947e-23	down	yes
TraesCS1B02G362600	0.709826	0.48588	0.689731	1.53138	1.84979	1.61284	0.37754	-1.4053	7.52533e-05	0.00094993	down	yes
TraesCS1D02G428500	0	0	0	0.05472	0.065359	0.057023	0.00169394	-9.2054	0.00715891	0.0440172	down	yes
TraesCS1A02G348000	0.383992	0.443571	0.224075	0.61766	0.951409	1.18732	0.381528	-1.39014	0.00723943	0.0444246	down	yes
TraesCS7B02G134000	0.344047	0.459091	0.595937	1.35143	1.32057	0.876319	0.394293	-1.34266	0.000298988	0.0031427	down	yes
TraesCS7A02G421600	0.342471	0.320763	0.372262	0.9773	0.90006	0.686526	0.403878	-1.30801	1.54691e-06	3.02576e-05	down	yes
TraesCS1B02G363000	0.408811	0.325205	0.471302	1.02435	0.928038	1.02669	0.404593	-1.30546	2.29285e-07	5.33326e-06	down	yes
TraesCS5A02G283500	0	0	0	0.14589	0.067353	0.12783	0.000879577	-10.1509	0.0063977	0.0403597	down	yes
TraesCS5A02G458700	1.14019	1.45952	1.47516	2.27334	4.62104	3.48907	0.392439	-1.34946	1.8178e-07	4.29092e-06	down	yes
TraesCS2B02G498100	0.415725	0.905935	2.11868	3.06382	2.05281	3.72616	0.389056	-1.36195	0.00254838	0.0191948	down	yes
TraesCS4A02G081500	0.348349	0.568828	0.333413	1.21018	1.10502	1.00442	0.376727	-1.40841	8.05878e-06	0.000131967	down	yes
TraesCS7B02G278200	1.41323	1.37609	1.57727	5.32763	9.4622	8.82287	0.184926	-2.43498	1.88927e-33	5.85406e-31	down	yes
TraesCS7D02G373100	0.076624	0.123261	0.2125	0.439697	1.55011	1.04928	0.135694	-2.88157	3.11758e-08	8.56565e-07	down	yes
TraesCS7A02G376800	3.88915	2.5837	3.35891	5.91641	8.73331	6.08159	0.474247	-1.07629	5.10479e-08	1.35007e-06	down	yes
TraesCS4D02G021400	0.53679	0.485993	0.490997	1.23018	1.82624	1.90438	0.305149	-1.71241	1.53967e-11	7.00234e-10	down	yes
TraesCS4B02G065700	0.269737	0.501748	0.734821	0.893337	1.10925	2.67026	0.322353	-1.63329	0.000595744	0.00568679	down	yes
TraesCSU02G051800	0.236578	0.281829	0.280035	0.687334	0.645231	0.573952	0.418796	-1.25568	0.0053971	0.0352996	down	yes
TraesCS5B02G517800	0.227901	0.269582	0.235663	0.647931	0.565055	0.59419	0.405686	-1.30156	1.7917e-06	3.44977e-05	down	yes
TraesCS7D02G270700	0.128464	0.104065	0.092895	0.567159	0.390261	0.758193	0.189684	-2.39833	2.31372e-05	0.000333939	down	yes
TraesCS7A02G355900	0	0	0	0.027805	0.224424	0.027699	0.0010717	-9.86588	0.00247364	0.0187221	down	yes
TraesCS4B02G230900	0.525473	0.70408	0.439102	1.30691	1.57516	0.946984	0.435788	-1.1983	9.95036e-05	0.00121461	down	yes
TraesCS4D02G232400	0.150382	0.300058	0.148699	0.53893	0.39019	0.688359	0.370415	-1.43278	0.00222577	0.017187	down	yes
TraesCS6D02G354500	0.472255	0.447104	0.888829	1.5539	0.944713	1.55983	0.445537	-1.16638	0.00343886	0.0244667	down	yes
TraesCS1D02G342500	0.446175	0.564953	0.149314	1.16281	1.55632	1.18121	0.297523	-1.74893	0.000347391	0.00357778	down	yes
TraesCS1B02G353400	0.240669	1.00812	0.687635	1.67499	2.00894	1.6226	0.364913	-1.45437	0.00360049	0.0254186	down	yes
TraesCS1B02G166000	0	0.0518464	0.0715532	0.17462	0.301435	0.219394	0.177439	-2.49461	0.00606956	0.0387163	down	yes
TraesCS7D02G390800	0.369802	0.287674	0.140773	0.618374	0.895106	0.576919	0.381864	-1.38887	0.00234783	0.0179453	down	yes
TraesCS2A02G551200	0.402854	0.260777	0.267432	0.800212	0.697264	0.625087	0.438651	-1.18886	0.00354296	0.0250822	down	yes
TraesCS2B02G120600	0.457397	0.596467	0.375107	1.57492	1.43324	1.45185	0.320396	-1.64207	6.0872e-13	3.32696e-11	down	yes
TraesCS2D02G102800	0.688517	0.739655	0.745006	2.1823	1.56685	2.11893	0.370339	-1.43308	1.45655e-12	7.54471e-11	down	yes
TraesCS4A02G212800	0.015036	0	0	0.778554	0.38918	0.160258	0.0113224	-6.46468	4.98164e-09	1.58337e-07	down	yes
TraesCS4D02G099600	0.485747	0.380671	0.262169	1.65034	1.66739	1.08285	0.256463	-1.96318	5.51367e-09	1.74022e-07	down	yes
TraesCS4B02G103000	0.311803	0.599394	0.292535	1.31637	0.935728	0.67602	0.411094	-1.28246	0.00117638	0.0101065	down	yes
TraesCS4D02G322700	0.183474	0.19933	0.353615	0.75116	0.778214	0.63083	0.340903	-1.55257	6.8134e-05	0.00087011	down	yes
TraesCS5D02G408000	0.952584	0.725272	0.723884	4.80327	5.1257	4.2855	0.168964	-2.56521	8.9179e-10	3.16634e-08	down	yes
TraesCS1D02G270300	0.026801	0.181967	0.276237	1.30818	1.23102	0.912419	0.140515	-2.8312	2.02557e-05	0.000297259	down	yes
TraesCS5D02G234400	0.581896	1.11774	0.229311	2.34083	2.00641	2.46279	0.283251	-1.81985	0.000730351	0.00676434	down	yes
TraesCS5B02G559200	1.37932	0.994069	1.29703	2.90318	2.39601	2.50568	0.470274	-1.08843	0.000544354	0.00527172	down	yes
TraesCS3B02G219700	0.316679	0.560714	0.464207	0.817011	0.737374	1.16409	0.493512	-1.01884	0.00724518	0.0444534	down	yes
TraesCS3D02G194300	0.388842	0.378058	0.295507	0.515379	1.02896	0.711141	0.471035	-1.08609	0.00786751	0.0474937	down	yes
TraesCS5D02G045200	0.167352	0.348434	0.580289	0.863609	0.891478	1.53218	0.333431	-1.58454	0.000235921	0.00256574	down	yes
TraesCS3D02G161900	0.813223	1.19051	0.898289	1.61501	1.79992	2.49168	0.491317	-1.02528	0.00161605	0.0131867	down	yes
TraesCS3A02G154600	0.362022	0.497483	0.525521	1.12663	1.37831	0.803372	0.418651	-1.25618	0.00333941	0.0238594	down	yes
TraesCS7B02G287700	1.56055	1.36807	1.6013	3.87658	2.84889	2.89599	0.470816	-1.08677	4.1652e-07	9.20126e-06	down	yes
TraesCS3D02G029300	0	0	0	0.174779	0.176579	0.166746	0.000579034	-10.7541	1.51434e-06	2.96992e-05	down	yes
TraesCS3D02G017400	0.435201	0.389963	0.393311	0.827307	0.896259	0.751015	0.492396	-1.02211	3.68767e-05	0.000504978	down	yes
TraesCS4A02G148400	0.108681	0.388588	0.260988	0.999776	0.69232	0.5524	0.337829	-1.56563	0.00406744	0.0280467	down	yes
TraesCS5D02G372700	0.619211	0.52737	0.661526	1.44192	1.27443	1.15882	0.466587	-1.09978	6.65004e-07	1.40453e-05	down	yes
TraesCS3B02G282000	0.871968	0.925469	1.19627	1.91735	2.18447	2.04433	0.487087	-1.03775	1.80625e-06	3.47204e-05	down	yes
TraesCS4B02G099700	6.63142	6.75138	9.00692	23.6597	27.7935	24.8397	0.29347	-1.76871	5.70048e-43	3.17322e-40	down	yes
TraesCS4D02G095900	10.8926	10.3736	12.1287	20.4733	25.9935	22.0805	0.487182	-1.03747	7.94941e-21	9.487e-19	down	yes
TraesCS2A02G364000	6.26674	7.74296	5.06383	19.6772	18.7692	18.7507	0.33347	-1.58437	1.21458e-33	3.81126e-31	down	yes
TraesCS2D02G361800	5.51277	6.32362	4.82031	15.5503	16.853	13.7026	0.36127	-1.46885	2.27847e-30	5.82315e-28	down	yes
TraesCS2B02G382000	5.34901	6.56109	4.31421	13.1108	11.6603	10.8694	0.455221	-1.13536	5.56585e-15	3.82697e-13	down	yes
TraesCS6A02G373400	1.77927	1.99323	1.63232	3.80002	4.2034	4.27853	0.440062	-1.18422	2.44823e-09	8.16466e-08	down	yes
TraesCS6D02G357600	0.666002	0.906399	1.07725	2.73341	2.82592	2.10921	0.345522	-1.53315	5.06662e-08	1.34041e-06	down	yes
TraesCS6B02G411100	1.14847	2.20281	1.39651	4.23621	3.58113	3.91845	0.404557	-1.30559	1.77194e-07	4.19851e-06	down	yes
TraesCS1B02G332200	0.318514	0.424502	0.233149	1.26409	0.634269	0.946671	0.343113	-1.54324	0.000352949	0.00362411	down	yes
TraesCS2B02G077600	0	0	0	0.114516	0.037422	0.071605	0.00134202	-9.54137	0.00300196	0.0219067	down	yes
TraesCS6A02G183200	0	0	0.00777609	0.0694162	0.049171	0.0705915	0.0411045	-4.60456	0.00184218	0.0147027	down	yes
TraesCS3B02G319100	0.198335	0.253673	0.203616	0.560166	0.407257	0.425094	0.47082	-1.08675	0.000495685	0.00486947	down	yes
TraesCS3D02G258200	0.0723296	0.0864456	0.0644572	0.316224	0.126273	0.164912	0.367516	-1.44412	0.00623561	0.0395336	down	yes
TraesCS6B02G205900	8.67654	8.52744	7.75419	17.9926	21.7287	17.9857	0.432498	-1.20923	5.20195e-44	3.06357e-41	down	yes
TraesCS6A02G178500	9.14629	8.60828	7.35456	19.038	22.9852	18.7405	0.413226	-1.275	9.90056e-41	4.87659e-38	down	yes
TraesCS7D02G366500	0.303843	0.410267	0.41643	1.06738	1.10195	0.8987	0.36849	-1.4403	1.77071e-11	7.96838e-10	down	yes
TraesCS7D02G465900	0	0	0	0.049305	0.059762	0.061874	0.00175499	-9.15432	5.71646e-06	9.71333e-05	down	yes
TraesCS7D02G337600	0.768979	0.893953	0.426419	1.31946	1.6339	1.55154	0.463795	-1.10844	8.90541e-05	0.00110061	down	yes
TraesCS1A02G240500	0.111021	0.056548	0.056464	0.496408	0.327423	0.165583	0.22643	-2.14286	0.000249672	0.00269151	down	yes
TraesCS4B02G200600	0.570116	0.407821	0.981834	1.43296	1.54146	1.19747	0.469757	-1.09001	0.000379978	0.00385875	down	yes
TraesCS1D02G240600	0.028423	0.020943	0.05871	0.232927	0.333108	0.106307	0.160746	-2.63715	0.000427304	0.00427157	down	yes
TraesCS3D02G284900	0.167059	0.25261	0.201435	0.364211	0.583773	0.453553	0.443159	-1.1741	0.000674297	0.00632154	down	yes
TraesCS3A02G253700	0.042727	0.073892	0.0926344	0.175923	0.241929	0.377831	0.262986	-1.92694	0.00190227	0.0150889	down	yes
TraesCS3A02G354500	0.117362	0.116922	0.123905	0.415583	0.364273	0.21306	0.360745	-1.47095	0.00497143	0.0330042	down	yes
TraesCS3B02G319000	0.138921	0.249037	0.11148	0.388413	0.359265	0.282164	0.484966	-1.04405	0.00835143	0.0498448	down	yes
TraesCS7A02G174700	11.5438	9.06061	10.028	21.9543	20.9314	20.8067	0.480942	-1.05606	2.96513e-23	4.25012e-21	down	yes
TraesCS7D02G175900	11.4546	9.5979	8.88232	21.2113	17.5147	24.9695	0.469968	-1.08936	1.59333e-16	1.2683e-14	down	yes
TraesCS7D02G176000	3.75683	2.93711	3.37936	7.77706	7.12221	6.78643	0.464513	-1.10621	5.08206e-13	2.7983e-11	down	yes
TraesCS7B02G079400	0.32326	0.466686	0.479472	1.464	1.12939	1.40855	0.3172	-1.65653	9.07529e-05	0.00112007	down	yes
TraesCS4B02G356100	0	0	0	0.0927333	0.0738444	0.0206105	0.00160266	-9.28531	0.00278123	0.0206105	down	yes
TraesCS3D02G258900	30.5594	31.4604	27.9086	64.2407	62.443	60.2441	0.481086	-1.05563	1.54382e-59	2.7882e-56	down	yes
TraesCS1B02G388700	7.23669	6.81771	6.79659	15.6297	13.5586	13.2679	0.491117	-1.02586	5.25842e-36	2.02541e-33	down	yes
TraesCS1B02G117500	1.21059	1.15492	1.39265	2.92542	3.14209	1.72306	0.482398	-1.05171	0.000871669	0.00786175	down	yes
TraesCS5B02G232700	0.570796	1.64482	1.12925	2.13073	3.87616	7.14057	0.254412	-1.97476	0.00199624	0.0156828	down	yes
TraesCS3D02G055400	0.326185	0.477298	0.15899	1.94114	1.7687	0.744611	0.21607	-2.21043	1.45277e-07	3.47877e-06	down	yes
TraesCS3A02G287500	0.895847	1.20318	0.721914	6.28436	4.77114	3.95866	0.187886	-2.41207	1.06302e-24	1.74886e-22	down	yes
TraesCS3D02G287100	0.155235	0.142584	0.022204	2.70474	1.30021	0.878942	0.0655262	-3.93178	2.86055e-13	1.63146e-11	down	yes
TraesCS3B02G322000	1.43285	1.30931	1.04062	4.09137	2.56293	3.73589	0.364072	-1.4577	2.85447e-09	9.45733e-08	down	yes
TraesCS3B02G322100	0.923178	1.12704	0.600811	3.69401	2.12013	2.83162	0.306628	-1.70544	5.84775e-09	1.83498e-07	down	yes
TraesCS3D02G287300	1.71149	2.12293	1.24367	4.33991	3.15314	3.60818	0.457435	-1.12836	1.4265e-06	2.81395e-05	down	yes
TraesCS3B02G321700	0.132975	0.10322	0.125192	0.751401	0.465099	0.395261	0.224219	-2.15702	0.00343801	0.0244628	down	yes
TraesCS3D02G287000	0.097252	1.35251	0.257006	5.81223	2.89968	3.52974	0.139423	-2.84246	0.00547516	0.0357124	down	yes
TraesCS3B02G322200	0.712558	1.20084	0.59007	2.24823	1.51783	1.32766	0.491482	-1.02479	0.00820212	0.0491305	down	yes
TraesCS3A02G186500	1.83742	2.12081	1.89005	4.93566	5.15661	5.90606	0.365556	-1.45184	3.50119e-12	1.72558e-10	down	yes
TraesCS3B02G216000	1.94386	2.1767	1.56116	4.35398	4.72129	3.91991	0.437218	-1.19358	3.89234e-08	1.05306e-06	down	yes
TraesCS3D02G190400	2.64898	2.81627	2.59693	6.31895	5.41183	7.29093	0.423841	-1.23841	4.58919e-08	1.22407e-06	down	yes
TraesCS4B02G081200	6.46745	4.03168	6.67523	12.8946	9.92625	13.5861	0.471733	-1.08396	5.27711e-10	1.94152e-08	down	yes
TraesCS1A02G022600	0	0	0	0	0	4.9199	6.09769e-05	-14.0014	2.4716e-08	6.92424e-07	down	yes
TraesCS1A02G258800	8.08961	7.66035	8.20619	19.2524	18.0031	20.6112	0.413988	-1.27234	6.05565e-42	3.19581e-39	down	yes
TraesCS1B02G269400	11.4517	14.002	12.3384	27.327	29.3936	26.3902	0.454719	-1.13695	5.87754e-35	2.05896e-32	down	yes
TraesCS4D02G015400	0	0	0	0.298589	0.128947	0.109502	0.00055862	-10.8058	6.52922e-07	1.38224e-05	down	yes
TraesCS4B02G070400	0.382702	0.466698	0.44324	1.16765	1.3364	1.17038	0.351794	-1.5072	2.54255e-08	7.09853e-07	down	yes
TraesCS4D02G069200	0.74073	0.670652	0.683895	1.87461	1.26777	1.56565	0.445043	-1.16798	4.06602e-06	7.19002e-05	down	yes
TraesCS6D02G138100	0.212457	0.593941	0.637581	1.04553	1.1942	1.3991	0.396825	-1.33342	0.000465119	0.00460709	down	yes
TraesCS4D02G246300	11.9259	14.1519	14.376	30.9781	27.4249	26.0245	0.479154	-1.06144	7.43327e-31	1.96142e-28	down	yes
TraesCS4A02G058000	5.32338	7.05885	6.48553	16.5765	14.4681	13.0012	0.428367	-1.22308	2.90957e-25	4.97825e-23	down	yes
TraesCS1D02G142700	3.42079	4.99243	4.41084	11.5866	11.491	12.4851	0.360605	-1.47151	7.93061e-28	1.62762e-25	down	yes
TraesCS7D02G357200	0.470449	0.716101	0.695463	1.44708	1.58603	1.01537	0.464868	-1.10511	0.00396236	0.0274863	down	yes
TraesCS3D02G428100	0	0	0	0	0.325199	0.090199	0.000722199	-10.4353	0.00788788	0.047592	down	yes
TraesCS5B02G028300	0.522487	1.07632	0.829799	2.92258	2.62222	2.7077	0.294288	-1.7647	1.08311e-09	3.79751e-08	down	yes
TraesCS3D02G466900	0.280147	0.207975	0.169234	0.679676	1.12728	0.696171	0.262614	-1.92898	2.44851e-06	4.5704e-05	down	yes
TraesCS7B02G070300	0	0	0	0.461892	0.476685	0.273786	0.000247451	-11.9806	0.000582621	0.0055825	down	yes
TraesCS4A02G247700	1.03963	0.970143	1.14286	3.62373	2.92445	4.25323	0.291872	-1.77659	1.22968e-11	5.63668e-10	down	yes
TraesCS4D02G066100	1.2122	1.44911	1.02579	2.92008	3.3424	3.24084	0.38798	-1.36594	1.49798e-07	3.5828e-06	down	yes
TraesCS7A02G256600	0.949751	1.16641	1.10234	2.66127	2.04781	3.40186	0.396811	-1.33348	1.39384e-07	3.35845e-06	down	yes
TraesCS2D02G481600	2.75686	2.51148	4.06779	10.3596	12.9043	9.01714	0.289215	-1.78979	7.11607e-21	8.51748e-19	down	yes
TraesCS3B02G136600	0.396684	0.483335	0.395498	1.11474	1.05169	0.581341	0.464201	-1.10718	6.69083e-05	0.000857017	down	yes
TraesCS3A02G487200	0.86556	0.824591	0.576072	2.141	1.45742	1.28458	0.464105	-1.10748	4.31352e-05	0.000579357	down	yes
TraesCS7D02G490700	0.24234	0.162077	0.170107	0.725168	0.585924	0.425913	0.330756	-1.59616	0.000766868	0.00704395	down	yes
TraesCS1D02G049800	0	0	0.079341	0.267466	0.278059	0.345145	0.0890801	-3.48875	0.000822019	0.00747036	down	yes
TraesCS6A02G147300	1.07327	0.67508	1.01662	2.25411	1.701	1.70815	0.488231	-1.03437	0.000131541	0.00155207	down	yes
TraesCS5A02G225100	1.42149	1.20759	0.406725	2.25632	2.16951	2.00955	0.471737	-1.08395	0.00265004	0.0198225	down	yes
TraesCS1A02G177800	2.21557	2.32237	2.42136	6.53877	4.44914	3.7395	0.472541	-1.08149	1.31173e-08	3.85698e-07	down	yes
TraesCS5B02G375900	0.096649	0.111765	0.121551	0.416334	0.228703	0.251768	0.367934	-1.44248	0.00682321	0.0424671	down	yes
TraesCS6B02G209000	0.973762	0.985498	0.595115	1.70344	2.03487	1.893	0.453602	-1.1405	6.08674e-05	0.000788717	down	yes
TraesCS2B02G601300	0.084306	0.087288	0.12985	0.264101	0.483799	0.488054	0.243896	-2.03566	0.00058652	0.00561268	down	yes
TraesCSU02G036400	0.311607	0.221826	0.147261	0.68337	0.444596	0.679137	0.376677	-1.4086	0.00389417	0.0271151	down	yes
TraesCS4A02G239100	0.323904	0.297009	0.228764	0.611915	0.749732	0.779725	0.396791	-1.33355	0.000258439	0.00277498	down	yes
TraesCS4B02G076000	0	0.017708	0	0.14831	0.084929	0.079642	0.0565966	-4.14314	0.00272345	0.0202527	down	yes
TraesCS3B02G485700	0.491538	0.422422	0.714074	1.78226	1.72179	1.59197	0.319472	-1.64624	6.2504e-08	1.62711e-06	down	yes
TraesCS3D02G441700	0.394764	0.358856	0.317382	1.11181	1.30854	1.24244	0.292401	-1.77398	3.41077e-07	7.63427e-06	down	yes
TraesCS3A02G449000	0.619024	1.0341	0.543433	1.87169	1.11707	1.72672	0.465819	-1.10216	0.00176124	0.0141568	down	yes
TraesCS2D02G288900	0.541346	0.261327	0.27418	0.810818	0.775398	0.749107	0.461115	-1.1168	0.00521153	0.0342873	down	yes
TraesCS1D02G073500	0.078442	0.093961	0.119312	0.444837	0.31227	0.415661	0.248741	-2.00729	0.000378857	0.00384881	down	yes
TraesCS2D02G381600	0.892955	1.25427	1.02585	3.07364	2.69809	2.02056	0.407207	-1.29617	2.50512e-08	7.00125e-07	down	yes
TraesCS2A02G384900	0.660872	0.83357	0.924694	2.26937	1.82415	1.76764	0.41274	-1.27669	3.44891e-08	9.42184e-07	down	yes
TraesCS2D02G142000	0.180441	0.137981	0.27429	0.803559	0.726587	0.475902	0.295462	-1.75895	9.45886e-06	0.000152142	down	yes
TraesCS1D02G304600	0.321472	0.405005	0.461672	1.26597	0.83379	0.712275	0.422523	-1.2429	5.69517e-05	0.000743666	down	yes
TraesCS6A02G096100	0.707258	0.859914	0.789096	1.71914	1.62819	1.53541	0.482571	-1.05119	2.61788e-11	1.15693e-09	down	yes
TraesCS4D02G096000	0.3741	0.675382	0.326329	0.812068	0.765802	1.18218	0.498472	-1.00441	0.00235073	0.0179642	down	yes
TraesCS6B02G462700	3.78944	3.68585	2.92269	7.72335	8.01994	6.74409	0.462391	-1.11281	1.15423e-12	6.07949e-11	down	yes
TraesCS6D02G398100	1.78882	2.63152	2.32817	4.84832	5.33394	5.46631	0.431254	-1.21339	9.13028e-11	3.72088e-09	down	yes
TraesCS3D02G178900	2.11123	2.56456	2.42259	4.65405	4.86359	5.15421	0.483809	-1.04749	3.38737e-07	7.58816e-06	down	yes
TraesCS3B02G203200	1.54663	2.54406	1.48639	4.59886	6.59782	4.16488	0.363054	-1.46174	3.45401e-07	7.72466e-06	down	yes
TraesCS2D02G451700	0.296371	0.224992	0.220666	0.791829	0.660345	0.735003	0.339263	-1.55952	2.57277e-09	8.5589e-08	down	yes
TraesCS3D02G263000	0	0.017427	0	0.106499	0.141185	0.04676	0.0591861	-4.0786	0.00360786	0.0254596	down	yes
TraesCS5B02G468400	12.292	12.1328	12.4821	36.5348	26.5077	28.6491	0.402512	-1.3129	3.06942e-34	1.0182e-31	down	yes
TraesCS2D02G204400	10.8327	10.6092	10.6964	24.2385	18.2001	22.3827	0.495798	-1.01218	1.33608e-22	1.83422e-20	down	yes
TraesCS2A02G196400	2.93303	2.31913	2.3079	9.4986	6.37014	6.58015	0.336768	-1.57017	2.57679e-20	2.94959e-18	down	yes
TraesCS2B02G224300	3.6903	3.82392	3.19613	9.64911	7.15763	7.43174	0.441874	-1.17829	5.9272e-19	5.95446e-17	down	yes
TraesCS1B02G122800	4.15233	4.6258	4.13804	11.0119	7.77692	8.08418	0.480638	-1.05698	6.62654e-15	4.51048e-13	down	yes
TraesCS1D02G103500	4.05229	3.08813	3.53333	8.85056	5.94762	6.78868	0.494456	-1.01609	4.00951e-11	1.72687e-09	down	yes
TraesCS7A02G131200	8.43895	10.1278	7.88802	17.9741	18.0133	18.023	0.48981	-1.02971	2.23167e-29	5.30327e-27	down	yes
TraesCS7A02G204800	6.54711	8.32661	5.35716	15.3546	12.223	14.2754	0.483379	-1.04877	7.25212e-13	3.91624e-11	down	yes
TraesCS5A02G217200	1.68418	1.70383	1.42529	4.2404	3.68859	5.25714	0.365029	-1.45392	9.50955e-14	5.76761e-12	down	yes
TraesCS5B02G216000	1.24483	1.18049	1.65826	2.78573	3.15943	3.15432	0.44877	-1.15595	3.61606e-08	9.81905e-07	down	yes
TraesCS4B02G298700	0.366766	0.594781	0.381526	1.07489	1.19068	1.39419	0.366984	-1.44621	9.08792e-06	0.000146896	down	yes
TraesCS4B02G298800	0.292351	0.414282	0.461343	1.03193	1.05491	1.21476	0.353762	-1.49915	1.34848e-05	0.000207885	down	yes
TraesCS5D02G225200	0.314558	0.1805	0.265109	0.679758	0.735438	0.83307	0.338113	-1.56442	0.000212325	0.00234521	down	yes
TraesCS4A02G175200	0.472768	0.421341	0.426118	1.53508	0.64098	1.23889	0.386602	-1.37108	0.00587152	0.0377255	down	yes
TraesCS1B02G129800	0	0	0	0.616716	0.03391	0.068762	0.000417021	-11.2276	3.72574e-05	0.000509161	down	yes
TraesCS4B02G388600	0	0	0.016297	0.506519	1.28413	1.10981	0.00561875	-7.47553	8.00356e-17	6.60371e-15	down	yes
TraesCSU02G124600	0.019383	0.03356	0	0.215188	1.02784	0.592607	0.0288419	-5.11569	2.72831e-11	1.20247e-09	down	yes
TraesCS5A02G553000	0	0	0	0.066782	0.089413	0.196356	0.000850941	-10.1987	0.000130687	0.00154333	down	yes
TraesCS7B02G335600	1.78551	2.55904	1.98182	5.73196	5.23605	4.82382	0.400611	-1.31973	7.80357e-12	3.67446e-10	down	yes
TraesCS2B02G207200	0.120508	0.190648	0.053113	0.50388	0.572671	0.461932	0.236772	-2.07843	0.0013839	0.0116042	down	yes
TraesCS6B02G214100	0.167706	0.361746	0.13863	0.959448	0.874553	0.908334	0.243618	-2.03731	6.32598e-11	2.63384e-09	down	yes
TraesCS6D02G172400	0.737006	0.981049	0.753578	1.56164	2.04116	1.75827	0.461033	-1.11706	1.03934e-07	2.58079e-06	down	yes
TraesCS1A02G220100	0.401997	0.430127	0.264031	0.71982	0.81449	0.680152	0.494998	-1.0145	0.0012065	0.0103292	down	yes
TraesCS1B02G233400	0.084787	0.097358	0.047706	0.481156	0.13843	0.153466	0.297329	-1.74987	0.00716172	0.0440311	down	yes
TraesCS7D02G354000	0.155438	0.100538	0.187201	0.698828	0.5511	0.378507	0.272149	-1.87753	9.1791e-05	0.00113237	down	yes
TraesCS6D02G121200	0.469663	0.74554	0.704889	1.48574	1.72269	1.95145	0.37212	-1.42616	5.02002e-08	1.32852e-06	down	yes
TraesCS2A02G583000	10.6304	10.2097	8.19963	27.6887	23.873	23.0457	0.389233	-1.36129	8.75793e-29	1.92904e-26	down	yes
TraesCS2B02G603600	8.73035	10.4458	8.67081	25.5157	20.2375	20.6255	0.419518	-1.2532	3.82304e-27	7.57819e-25	down	yes
TraesCS2D02G597200	0.238291	0.246365	0.147806	1.0202	0.601788	0.462263	0.303449	-1.72048	0.00272202	0.0202456	down	yes
TraesCS3A02G363700	2.63814	2.96953	3.69808	9.65499	10.6281	9.5755	0.311661	-1.68195	1.33185e-41	6.85078e-39	down	yes
TraesCS3B02G395900	3.29444	3.84952	4.78485	11.871	12.7324	10.317	0.3416	-1.54962	2.73208e-31	7.35237e-29	down	yes
TraesCS3D02G357200	5.00086	4.78143	7.38848	16.9144	17.9604	13.6519	0.353841	-1.49883	4.59005e-09	1.46867e-07	down	yes
TraesCS1D02G103200	0	0	0	0.154861	0.043889	0.112188	0.000964823	-10.0174	2.54147e-05	0.000362369	down	yes
TraesCS2D02G167700	0.11064	0.186387	0.184443	0.452585	0.457398	0.438217	0.357121	-1.48552	8.60069e-05	0.00106701	down	yes
TraesCS1A02G108000	0.936265	1.15009	1.08627	2.73014	2.55151	2.4684	0.409368	-1.28853	2.00013e-07	4.69674e-06	down	yes
TraesCS7D02G080400	1.45088	1.04823	1.18673	3.18158	2.95908	3.45971	0.383927	-1.3811	4.13082e-12	2.01634e-10	down	yes
TraesCS7A02G136500	0.276195	0.754348	0.876395	1.2247	1.51623	1.60562	0.438725	-1.18861	0.00157735	0.0129333	down	yes
TraesCS7D02G204900	0.077083	0.163139	0.135336	0.351033	0.392935	0.375424	0.335502	-1.57561	0.00358594	0.0253335	down	yes
TraesCS4A02G287500	0	0	0.008236	0.363799	0.272224	0.317326	0.00863902	-6.85492	1.58561e-06	3.09179e-05	down	yes
TraesCS4A02G285200	0	0	0.024295	0.433472	0.202162	0.241902	0.0276855	-5.17473	9.36832e-06	0.000150828	down	yes
TraesCS1B02G107400	0.124072	0.109855	0.367696	0.747782	1.06401	0.357614	0.277322	-1.85037	0.000756097	0.00696233	down	yes
TraesCSU02G235600	0.272231	0.433657	0.371196	0.77079	0.663457	1.15882	0.41537	-1.26753	0.00164896	0.0134135	down	yes
TraesCS4D02G024500	0.212191	0.199517	0.048971	0.367652	0.602422	0.649438	0.284455	-1.81373	0.00333509	0.0238327	down	yes
TraesCS1B02G192200	1.68846	2.54621	3.26501	5.21326	5.89571	4.90488	0.468324	-1.09442	1.25956e-07	3.05937e-06	down	yes
TraesCS4D02G325800	0.1339	0.103531	0.084984	0.50463	0.56131	0.865615	0.16692	-2.58277	1.3386e-06	2.65861e-05	down	yes
TraesCS4D02G325700	0	0	0.027705	0.226699	0.365464	0.417253	0.0274466	-5.18723	1.55701e-06	3.04332e-05	down	yes
TraesCS5A02G500400	0	0	0	0.058647	0.125332	0.183469	0.000816442	-10.2584	0.000128799	0.00152277	down	yes
TraesCS5A02G500700	0	0.049516	0.092894	0.180472	0.640125	0.564147	0.102842	-3.2815	0.000200708	0.00223329	down	yes
TraesCS5A02G275900	0.11437	0.080908	0	0.344675	0.488253	0.511207	0.145282	-2.78308	0.00029777	0.00313435	down	yes
TraesCS5A02G500500	0	0	0	0.049041	0.081837	0.101363	0.00129176	-9.59644	0.0023442	0.0179227	down	yes
TraesCS4A02G099500	0	0	0	0.062413	0.015625	0.064958	0.00209796	-8.8968	0.00246703	0.0186877	down	yes
TraesCS4B02G072400	0.139843	0.266599	0.348622	0.65397	0.705757	0.635648	0.378407	-1.40199	0.00523491	0.0344244	down	yes
TraesCS7A02G247600	0	0	0	0.12881	0.149504	0	0.00107792	-9.85754	0.00525097	0.0345105	down	yes
TraesCS4B02G207100	1.93012	3.47313	1.66663	14.7601	15.3155	11.3886	0.170505	-2.55211	2.43902e-13	1.40784e-11	down	yes
TraesCS4A02G097400	0.699052	4.06864	1.65833	28.0365	36.2909	20.5629	0.075698	-3.7236	1.88687e-07	4.44235e-06	down	yes
TraesCS4D02G207900	0	0.094581	0	1.70297	2.3607	1.62888	0.0166149	-5.91138	0.00162467	0.0132451	down	yes
TraesCS4D02G207800	6.04857	8.87083	5.82474	21.1442	22.5734	17.3777	0.339538	-1.55836	1.8628e-28	4.01573e-26	down	yes
TraesCS4A02G097500	6.90786	9.17409	7.82907	20.9606	20.3788	15.9084	0.417676	-1.25954	2.32649e-24	3.72935e-22	down	yes
TraesCS5A02G008900	3.11028	3.90823	3.1922	14.8481	15.9305	14.9491	0.223294	-2.16298	5.74189e-87	3.11103e-83	down	yes
TraesCS5D02G014300	12.2965	15.2902	14.3286	37.1598	36.1313	34.9107	0.387382	-1.36817	2.07023e-58	3.43371e-55	down	yes
TraesCS5B02G007200	7.03701	10.4855	9.97691	32.3242	34.6546	33.5632	0.273512	-1.87033	2.61459e-57	3.86351e-54	down	yes
TraesCS5B02G007100	44.251	51.6824	41.3747	115.161	127.444	115.26	0.383687	-1.382	1.33563e-70	3.87677e-67	down	yes
TraesCS5A02G008800	8.3993	11.5811	6.43862	41.3369	47.062	37.2555	0.210251	-2.24981	1.06701e-17	9.50854e-16	down	yes
TraesCS5D02G014200	25.9488	30.526	20.8672	71.3052	78.9485	63.7962	0.361327	-1.46862	2.47088e-16	1.9272e-14	down	yes
TraesCS5B02G007000	46.4185	53.4412	48.6947	146.032	168.644	145.242	0.323002	-1.63038	2.31583e-108	2.35265e-104	down	yes
TraesCS5A02G008700	10.9014	12.9003	9.96954	47.5913	57.052	41.5763	0.230962	-2.11427	5.79655e-84	2.94436e-80	down	yes
TraesCS5D02G014100	29.7906	33.8783	31.6495	78.2838	89.6829	77.4266	0.388431	-1.36427	4.65241e-75	1.80053e-71	down	yes
TraesCS2B02G066000	2.23633	2.5082	2.79633	6.42698	5.63118	5.54569	0.428364	-1.22309	6.49264e-15	4.42676e-13	down	yes
TraesCS2A02G051700	2.51503	3.60346	3.20653	10.0389	6.47233	7.04039	0.39594	-1.33664	3.43423e-13	1.93555e-11	down	yes
TraesCSU02G024200	2.57822	3.93904	3.57242	6.94606	7.12183	6.49459	0.490684	-1.02713	3.53909e-10	1.33409e-08	down	yes
TraesCS3A02G013800	0.116133	0.125815	0.095303	0.404799	0.445405	0.534126	0.24362	-2.03729	0.000110769	0.0013335	down	yes
TraesCS3B02G016500	0.12062	0.114643	0.019506	0.28015	0.470922	0.372833	0.226682	-2.14126	0.000969176	0.00859431	down	yes
TraesCS6B02G256500	0.63835	0.976107	1.01336	2.1232	2.3208	2.01732	0.4067	-1.29796	1.34643e-05	0.000207642	down	yes
TraesCS3D02G342800	0	0.001561	0.011214	0.153769	0.337775	0.262419	0.0169438	-5.8831	0.000319118	0.00332547	down	yes
TraesCS2B02G399800	0.377205	0.979338	0.488348	1.7079	1.15364	1.48087	0.424854	-1.23496	0.00159462	0.013041	down	yes
TraesCS1B02G172100	0.423994	0.518597	0.155221	0.787194	1.11919	1.17082	0.356757	-1.48699	0.00279904	0.020718	down	yes
TraesCS1A02G154900	0.46146	0.505863	0.628588	1.17103	1.68757	1.13761	0.399357	-1.32425	0.00327368	0.0234702	down	yes
TraesCS2D02G378900	0.573777	0.760503	0.443428	0.692902	1.53742	1.56435	0.468476	-1.09395	0.00640848	0.0404057	down	yes
TraesCS5B02G393400	0.613324	0.513362	0.459628	1.8361	1.50526	2.29364	0.281511	-1.82874	5.79962e-18	5.30796e-16	down	yes
TraesCS2B02G544100	0.235237	0.161377	0.10041	1.36097	0.968214	1.16993	0.142043	-2.8156	9.64289e-15	6.48756e-13	down	yes
TraesCS5D02G398800	0.136545	0.17903	0.209791	0.666389	0.685996	0.707892	0.254998	-1.97144	2.20059e-11	9.77838e-10	down	yes
TraesCS5A02G388800	0.057727	0.154522	0.188463	0.453548	0.397627	0.371673	0.327687	-1.60961	0.00026453	0.00283141	down	yes
TraesCS3B02G284800	0.157576	0.182237	0.154773	0.87009	0.542045	0.693926	0.234839	-2.09025	7.13005e-11	2.94598e-09	down	yes
TraesCS2D02G406900	0.01485	0.045765	0	0.251929	0.440889	0.1873	0.0688714	-3.85995	1.10602e-05	0.000174337	down	yes
TraesCS3D02G253700	0.210625	0.446879	0.378548	1.18557	0.858079	0.760138	0.369519	-1.43628	1.50674e-05	0.00022919	down	yes
TraesCS3A02G252900	0.438683	0.570044	0.251508	0.855046	0.707381	1.22486	0.452137	-1.14517	0.00305999	0.0222125	down	yes
TraesCS5A02G503500	0.112115	0.354986	0.105142	0.647047	0.459044	0.592636	0.336866	-1.56975	0.00744344	0.0454161	down	yes
TraesCS1A02G301100	0.028062	0	0	0.07557	0.159649	0.291911	0.0532354	-4.23147	0.00183543	0.014656	down	yes
TraesCS3A02G343900	0.023489	0.022994	0	0.109679	0.16781	0.235935	0.0905353	-3.46538	0.00563497	0.0365262	down	yes
TraesCS6A02G013600	0.3364	0.41757	0.406752	0.773569	0.75919	1.04902	0.449582	-1.15334	0.000594651	0.00567769	down	yes
TraesCS2A02G348200	0.539142	0.517227	0.370634	1.18828	1.06786	1.21947	0.410575	-1.28428	6.42093e-05	0.000826615	down	yes
TraesCS5D02G292500	0.04981	0	0.032173	0.297834	0.171958	0.240702	0.115389	-3.11543	2.53289e-05	0.000361273	down	yes
TraesCS5B02G284400	0.047121	0.123037	0.09555	0.400621	0.276186	0.314923	0.267924	-1.90011	5.04992e-05	0.000667889	down	yes
TraesCS5A02G285000	0	0.01825	0.022826	0.168731	0.110017	0.079987	0.114502	-3.12655	0.000779333	0.0071415	down	yes
TraesCS1B02G467800	0.250621	0.24912	0.351348	0.935891	0.597856	0.392289	0.441886	-1.17825	0.00249851	0.018875	down	yes
TraesCS3D02G041500	1.85869	2.3287	1.4133	8.46997	6.32719	5.08546	0.281688	-1.82783	1.57096e-14	1.03548e-12	down	yes
TraesCS3A02G038300	2.41743	2.19192	2.19815	5.78102	4.91131	4.89257	0.436802	-1.19495	1.99683e-14	1.29911e-12	down	yes
TraesCS1A02G238800	2.02456	2.76765	2.36734	5.94564	7.08657	5.52981	0.38571	-1.37441	7.27425e-11	3.0025e-09	down	yes
TraesCS3B02G045500	1.07213	0.841719	0.5022	3.27884	2.17412	2.64252	0.298444	-1.74447	4.78629e-10	1.77123e-08	down	yes
TraesCS3D02G041400	0.226528	0.386746	0.155486	1.88965	1.50173	1.28663	0.164335	-2.60529	1.47099e-09	5.06139e-08	down	yes
TraesCS3D02G499700	2.19813	3.51626	3.02787	6.92895	7.58064	6.02785	0.425674	-1.23218	4.27814e-08	1.14637e-06	down	yes
TraesCS3D02G484900	3.14546	3.79345	2.9928	6.17635	7.09267	6.82441	0.494277	-1.01661	4.81235e-08	1.27787e-06	down	yes
TraesCS3D02G500000	0.654003	1.2612	1.54672	4.78337	3.98856	3.78658	0.275664	-1.85902	7.40461e-07	1.54821e-05	down	yes
TraesCS2D02G347500	1.04019	0.706563	0.482216	1.96965	1.83175	2.04492	0.381261	-1.39115	2.37534e-05	0.000341196	down	yes
TraesCS3A02G488400	2.21742	1.96432	1.46339	4.74415	3.78128	2.84477	0.496484	-1.01018	0.000149216	0.00173566	down	yes
TraesCS3A02G492500	2.40171	1.80133	1.69635	5.08313	4.03706	3.96452	0.450861	-1.14924	0.000263454	0.00282138	down	yes
TraesCS7B02G034000	0.210866	0.165577	0.033738	0.618007	0.521899	0.911576	0.199944	-2.32233	0.000275189	0.00292967	down	yes
TraesCS6D02G152100	0.902309	0.807814	1.26122	2.89237	2.20805	1.49972	0.450194	-1.15138	0.000424492	0.00424542	down	yes
TraesCS7A02G516900	0	0	0	0.209357	0.212639	0.135541	0.000538081	-10.8599	0.000493434	0.00485149	down	yes
TraesCS3B02G538300	0.072655	0.173747	0.203618	0.573555	0.662731	0.463275	0.264786	-1.9171	0.000881344	0.00793669	down	yes
TraesCS2A02G349100	1.0423	0.556812	0.73369	2.37103	1.57716	1.38457	0.437447	-1.19282	0.00119511	0.0102413	down	yes
TraesCS7A02G133200	0.087526	0.077619	0.032142	0.406767	0.302728	0.201609	0.216536	-2.20732	0.00306678	0.0222519	down	yes
TraesCS3D02G499800	0	0	0	0.050229	0.534204	0.092025	0.000443487	-11.1388	0.00468683	0.0314865	down	yes
TraesCS3D02G483200	0.293987	1.35759	0.562571	2.71138	2.14811	1.23135	0.363522	-1.45989	0.00736613	0.0450358	down	yes
TraesCS7D02G161200	0	0	0	0.169372	0.778467	0.210711	0.000258944	-11.9151	2.54562e-06	4.72994e-05	down	yes
TraesCS7A02G044300	0	0	0	0.075165	0.044667	0.082706	0.0014812	-9.39901	1.89402e-05	0.000280486	down	yes
TraesCS3B02G344500	0.023978	0.067055	0.180701	0.498054	0.427972	0.288921	0.223659	-2.16063	0.000193159	0.00216261	down	yes
TraesCSU02G086000	0	0	0	0.106564	0.019794	0.154144	0.00106951	-9.86883	0.000229723	0.0025084	down	yes
TraesCS7B02G453400	0.388788	0.331442	0.306097	0.651968	0.699735	0.737614	0.491226	-1.02554	0.000353006	0.00362424	down	yes
TraesCS6D02G387400	0	0	0	0.107819	0.040754	0.07096	0.00136654	-9.51526	0.000858637	0.00775972	down	yes
TraesCS7D02G549200	0	0	0	0.126959	0.028697	0.01718	0.00173575	-9.17023	0.00196794	0.0155054	down	yes
TraesCS4A02G400300	0.0340983	0.0315977	0.0382903	0.156327	0.12834	0.0910957	0.276734	-1.85343	0.00318973	0.0229615	down	yes
TraesCS3B02G604800	0	0	0	0.057459	0.008325	0.035978	0.00294806	-8.40602	0.00418337	0.0287349	down	yes
TraesCS7A02G440200	0.219746	0.192286	0.28994	0.46307	0.456985	0.492428	0.496978	-1.00875	0.00490223	0.0326542	down	yes
TraesCS7D02G547100	0	0	0	0.02647	0.018887	0.010625	0.00535887	-7.54386	0.00752391	0.0458108	down	yes
TraesCS1D02G057500	0.654731	0.433205	0	1.812	1.56977	2.56806	0.182852	-2.45126	0.00102341	0.00898897	down	yes
TraesCS1A02G056800	0	0.30598	0	1.1645	0.700447	0.741085	0.117412	-3.09035	0.00726619	0.0445588	down	yes
TraesCS7D02G204200	0	0.042952	0.04653	1.00281	0.196802	0.063039	0.0708686	-3.81871	0.00135064	0.0113609	down	yes
TraesCS7B02G107900	0	0.154142	0.145498	1.90776	0.281387	0.201317	0.125348	-2.99599	0.00340358	0.0242582	down	yes
TraesCS1B02G004900	0	0.00736	0	0.053053	0.054806	0.142243	0.029428	-5.08667	0.000222798	0.00244461	down	yes
TraesCS4A02G421800	0.145808	0.141014	0.263909	0.600368	0.476792	0.590931	0.330156	-1.59878	6.83161e-06	0.000113868	down	yes
TraesCS1B02G002700	0	0	0	0.02368	0.101615	0.037098	0.00184737	-9.08031	0.00010175	0.00123812	down	yes
TraesCS5D02G334000	0.17958	0.304575	0.156982	0.505911	0.475968	0.403426	0.462813	-1.1115	0.00286865	0.021128	down	yes
TraesCS5A02G024400	0	0.027	0.010142	0.143176	0.028026	0.149144	0.115943	-3.10851	0.00524281	0.0344708	down	yes
TraesCS5A02G347800	0.939542	1.36953	1.27007	2.54285	2.53065	3.05242	0.440459	-1.18292	7.00342e-07	1.4719e-05	down	yes
TraesCS6B02G359500	0.373255	0.601347	0.513274	0.84115	1.7047	1.36205	0.380736	-1.39314	7.45433e-05	0.000942483	down	yes
TraesCS2A02G410100	0.294061	0.273797	0.214761	0.73849	0.528842	0.5818	0.423236	-1.24047	0.0025753	0.0193671	down	yes
TraesCS2D02G136700	0	0.032724	0.167804	0.637319	0.23893	0.407823	0.156166	-2.67885	0.00185949	0.0148096	down	yes
TraesCS2B02G158000	0.093583	0.101337	0.340926	0.384589	0.58847	0.576043	0.345907	-1.53154	0.00738951	0.0451481	down	yes
TraesCS7A02G232500	4.28921	4.53358	4.50995	11.3183	8.65467	14.3983	0.387903	-1.36623	4.3325e-13	2.40349e-11	down	yes
TraesCS7B02G130900	1.23532	1.01398	1.77233	3.57524	2.65828	4.38663	0.378679	-1.40095	8.37797e-07	1.73344e-05	down	yes
TraesCS3D02G046700	0.078539	0.035078	0.109408	0.575453	0.673026	0.5164	0.126368	-2.98429	9.04016e-05	0.00111608	down	yes
TraesCS3D02G046800	0.113151	0.036702	0.131485	0.62314	1.23575	0.711273	0.109463	-3.19148	0.000230039	0.00251017	down	yes
TraesCS6A02G316200	0.981141	0.881738	0.745908	1.59822	1.92637	2.58836	0.426764	-1.22849	0.000270622	0.00288598	down	yes
TraesCS7D02G179400	0	0	0	0.152947	0.151746	0.081559	0.000776695	-10.3304	0.000282349	0.0029961	down	yes
TraesCS7B02G083100	0.220996	0.064521	0.245533	0.99021	0.647174	0.519589	0.246202	-2.02209	0.00134949	0.0113536	down	yes
TraesCS7B02G083300	2.02391	1.21877	1.58604	3.51719	3.67509	3.35315	0.457897	-1.1269	0.00236424	0.0180521	down	yes
TraesCS3A02G033900	0	0	0	0	0.118474	0.2931	0.000728909	-10.422	0.00625212	0.0396042	down	yes
TraesCS2B02G531300	0	0	0.058355	0.195408	0.25581	0.152343	0.0966845	-3.37057	0.00686834	0.0426729	down	yes
TraesCS1A02G352100	2.12023	2.62123	1.3291	7.45152	8.35455	7.26799	0.26309	-1.92637	4.49579e-17	3.81401e-15	down	yes
TraesCS1B02G371000	4.44997	4.36286	3.31859	9.77821	10.4514	7.39313	0.439182	-1.18711	7.25223e-07	1.51752e-05	down	yes
TraesCS1D02G054000	0	0	0.033647	0.206655	0.242942	0.060709	0.0659349	-3.92281	0.00586662	0.0377	down	yes
TraesCS2A02G514000	0	0.033196	0	0.247798	0.186479	0.077324	0.0648865	-3.94594	0.0072894	0.0446708	down	yes
TraesCS3B02G258300	0.962049	1.31186	1.05051	2.53715	2.32014	2.77072	0.435817	-1.1982	3.43e-07	7.67519e-06	down	yes
TraesCS4D02G231400	17.6327	19.3761	14.8216	44.5455	31.9774	27.3346	0.499053	-1.00273	4.46181e-05	0.000596906	down	yes
TraesCS3B02G127400	0.789134	0.724765	1.04607	1.87265	2.45959	2.17318	0.393514	-1.34551	2.00804e-08	5.72421e-07	down	yes
TraesCS3B02G353200	0	0.01532	0	0.070135	0.270329	0.163671	0.0303887	-5.04032	2.33972e-05	0.000337153	down	yes
TraesCS2A02G115000	0.089168	0.162447	0.190416	0.329199	0.396114	0.441751	0.378755	-1.40066	0.00210135	0.0164007	down	yes
TraesCS6A02G238300	0.444334	0.492421	0.728462	2.12837	2.16511	1.90682	0.26857	-1.89663	1.14421e-05	0.000179696	down	yes
TraesCS4A02G304100	0	0	0	0.139753	0	0.272144	0.000728337	-10.4231	0.00363164	0.0255938	down	yes
TraesCS3A02G473600	0.588429	0.503644	0.52219	1.51602	1.85479	1.25466	0.348994	-1.51872	8.93552e-09	2.70368e-07	down	yes
TraesCS3D02G168200	0.410659	0.269334	0.106434	0.579515	0.795291	0.573676	0.40361	-1.30897	0.00199067	0.0156486	down	yes
TraesCS2B02G394900	0	0	0.026792	0.724015	0.266467	0.300555	0.0207523	-5.59058	5.71161e-05	0.000745333	down	yes
TraesCS1A02G257000	0	0.055071	0	0.120949	0.295794	0.322153	0.0745315	-3.74601	0.00110771	0.00959965	down	yes
TraesCS7A02G059000	0.060437	0.122935	0.068634	0.37541	0.381419	0.451657	0.20853	-2.26167	6.25102e-07	1.32993e-05	down	yes
TraesCS7D02G053600	0.136192	0.240914	0.230089	0.678782	0.599321	0.586597	0.325626	-1.61871	2.24006e-06	4.21571e-05	down	yes
TraesCS4A02G430600	0.167222	0.477347	0.403077	0.736144	0.794297	0.719353	0.465663	-1.10264	0.0044319	0.0301162	down	yes
TraesCS5D02G494900	0	0	0	0	0	0.151239	0.00198362	-8.97765	0.00838198	0.0499721	down	yes
TraesCS4A02G042900	0.070808	0.206775	0	0.705685	1.14637	0.845717	0.102893	-3.28078	2.42623e-05	0.000347584	down	yes
TraesCS4D02G263600	0.334034	0.571181	0.098581	1.1876	0.864344	1.39955	0.290829	-1.78176	0.00687529	0.0426932	down	yes
TraesCS4A02G094300	0.509358	0.349588	0.339681	1.30703	1.05953	1.04323	0.351525	-1.5083	7.48727e-06	0.00012373	down	yes
TraesCS4D02G210900	0.722508	0.531038	0.924495	1.66636	2.10792	1.57267	0.407343	-1.29568	8.99827e-06	0.000145563	down	yes
TraesCS7D02G419600	0.041137	0.132741	0.19253	0.477522	0.644814	0.445435	0.233713	-2.09719	0.00122046	0.01043	down	yes
TraesCS6B02G360200	0.027881	0.042594	0	0.215161	0.040561	0.241458	0.141749	-2.81858	0.00372405	0.026132	down	yes
TraesCS5B02G024200	0.040797	0	0.020301	0.102954	0.203345	0.377827	0.0893081	-3.48506	0.000966346	0.00857389	down	yes
TraesCS2A02G191400	0.450974	0.580742	0.833079	1.67021	1.24147	1.15834	0.458179	-1.12602	0.00177045	0.0142224	down	yes
TraesCS2A02G125400	0.084153	0	0.029826	0.375322	0.419514	0.447477	0.0917474	-3.44619	1.01253e-05	0.000161386	down	yes
TraesCS4D02G357100	2.35493	2.56001	2.94161	11.0426	6.1524	4.50559	0.362043	-1.46577	4.79316e-09	1.52705e-07	down	yes
TraesCS2A02G018500	0.158873	0.343544	0.194565	1.88682	0.628842	0.78659	0.211063	-2.24426	6.90004e-07	1.4528e-05	down	yes
TraesCS5A02G532000	0	0.019472	0	0.069377	0.362271	0.263248	0.0280215	-5.15732	2.55761e-05	0.000364415	down	yes
TraesCS4A02G336300	0.301432	0.487121	0.175417	0.99123	1.06884	1.0508	0.309871	-1.69026	1.87396e-06	3.58776e-05	down	yes
TraesCS5B02G536100	0.324567	0.176904	0.355903	0.668777	0.851369	0.687816	0.38831	-1.36472	0.000276144	0.00293831	down	yes
TraesCS2A02G371400	0.239672	0.065499	0	0.438215	0.603641	1.0155	0.148332	-2.7531	0.00130908	0.0110594	down	yes
TraesCS7D02G402100	0.709403	0.634688	0.413331	1.34204	1.24655	1.54601	0.425051	-1.23429	0.000177826	0.00201454	down	yes
TraesCS6D02G368700	1.91502	1.91505	2.86101	4.91524	4.51085	4.52579	0.479583	-1.06015	2.65861e-08	7.38954e-07	down	yes
TraesCS2B02G215100	0.730101	0.612429	0.622247	1.68135	2.10409	1.02205	0.408691	-1.29092	4.88807e-05	0.000648381	down	yes
TraesCS2D02G195800	1.48942	0.806065	1.10772	2.69642	2.40534	1.93224	0.483822	-1.04745	9.24982e-05	0.00113936	down	yes
TraesCSU02G166400	0	0.022876	0	0.118005	0.115526	0.409787	0.0355594	-4.81363	6.01965e-05	0.000781017	down	yes
TraesCSU02G213000	0	0.021965	0	0.113306	0.110926	0.318819	0.0404474	-4.62781	0.000159778	0.00184165	down	yes
TraesCS1D02G158400	0.22503	0.227689	0.390389	0.664597	0.632165	0.569429	0.45178	-1.14631	0.00361533	0.0254998	down	yes
TraesCS2A02G003200	0	0.022972	0	0.553637	0.189618	0.228662	0.0236358	-5.40289	1.20322e-08	3.5624e-07	down	yes
TraesCS2A02G003300	0	0	0	0.076964	0.040156	0.051561	0.0017785	-9.13512	0.00328166	0.0235191	down	yes
TraesCS5B02G382300	4.79239	5.89652	5.31694	10.8665	10.3556	11.4056	0.49056	-1.0275	5.77747e-25	9.68137e-23	down	yes
TraesCS5D02G388700	7.85245	9.16792	11.0937	22.2719	22.1565	18.5332	0.446527	-1.16318	4.23733e-24	6.55955e-22	down	yes
TraesCS5B02G382400	0.207222	0.157953	0.187947	0.643797	0.799607	1.01446	0.225042	-2.15173	6.34719e-11	2.64132e-09	down	yes
TraesCS2D02G423500	0.152152	0.075217	0.036621	0.783189	0.444629	0.652938	0.140364	-2.83276	4.23267e-08	1.13531e-06	down	yes
TraesCS6B02G280400	0.230145	0.473951	0.485107	0.930401	1.10288	1.44622	0.341774	-1.54889	1.61197e-06	3.14092e-05	down	yes
TraesCS4B02G127100	0.363756	0.579274	0.498098	1.00215	1.14276	0.872846	0.47755	-1.06628	0.000184295	0.0020774	down	yes
TraesCS7A02G537900	0.043906	0.02429	0.075557	1.46841	0.526547	1.09902	0.0464623	-4.4278	1.26683e-14	8.43227e-13	down	yes
TraesCS7B02G456200	0	0.041837	0	0.27405	0.279903	0.388768	0.044379	-4.49398	7.81148e-06	0.000128461	down	yes
TraesCS7D02G079800	0.577188	1.66011	1.06034	2.7856	2.7828	2.33786	0.417092	-1.26156	6.5506e-05	0.000841575	down	yes
TraesCS7A02G084800	0.067027	0.216302	0.258567	0.354543	0.786303	1.14698	0.236861	-2.07789	0.000283467	0.00300561	down	yes
TraesCS7D02G079700	0.156984	0.220323	0.222322	0.71687	0.48292	0.796209	0.300415	-1.73497	0.00196182	0.0154707	down	yes
TraesCS6D02G285600	0.62296	0.797481	0.323306	1.01398	1.2474	1.4365	0.471553	-1.08451	0.00275434	0.0204393	down	yes
TraesCS5A02G185600	4.59647	4.88026	3.53466	10.5566	12.3196	11.156	0.382327	-1.38712	4.82584e-23	6.84478e-21	down	yes
TraesCS5D02G190700	1.95483	2.80004	2.83268	6.74955	5.85737	6.16043	0.404295	-1.30652	6.33078e-14	3.89195e-12	down	yes
TraesCS1D02G418400	0.18146	0.146584	0.133769	1.29708	1.23773	1.03584	0.129336	-2.95081	1.0427e-11	4.81489e-10	down	yes
TraesCS5B02G183700	1.35267	0.842018	0.927791	2.84438	3.51498	2.71174	0.344223	-1.53858	5.00117e-10	1.84668e-08	down	yes
TraesCS5A02G185700	0.237361	0.217274	0.268066	1.19552	1.17855	0.805303	0.22731	-2.13727	8.40951e-09	2.55881e-07	down	yes
TraesCS1A02G410500	0.118772	0.130138	0.174539	1.34366	0.57297	0.600422	0.168232	-2.57147	2.08147e-06	3.94877e-05	down	yes
TraesCS1D02G418000	0.207604	0.220321	0.061015	0.696658	0.592165	0.924182	0.220939	-2.17828	3.98462e-05	0.00054027	down	yes
TraesCS1D02G418700	0.77366	0.471605	0.415109	1.17492	1.39751	1.28685	0.430229	-1.21682	0.000124834	0.00148175	down	yes
TraesCS1A02G410700	0.504479	0.854966	0.842322	2.32534	1.30752	2.80585	0.341958	-1.54811	0.000158538	0.00182866	down	yes
TraesCS7B02G012600	0.130658	0.112425	0.080908	0.551241	0.572248	0.350176	0.219854	-2.18538	0.000243665	0.0026334	down	yes
TraesCS3D02G238300	0.06523	0.082433	0.05531	0.313736	0.289199	0.732304	0.152012	-2.71774	0.000255831	0.00274879	down	yes
TraesCS1B02G440800	0.413475	0.54371	0.598319	1.18758	1.02206	1.17485	0.459598	-1.12156	0.000269583	0.00287791	down	yes
TraesCS1B02G440300	1.17749	1.11463	0.890186	1.4204	2.43128	2.98097	0.465749	-1.10238	0.000401432	0.00404679	down	yes
TraesCS1B02G440500	0.626187	0.438051	0.941275	1.21898	1.30696	2.28289	0.417048	-1.26172	0.000829335	0.00753007	down	yes
TraesCS6B02G209600	0	0.079599	0	0.335474	0.424807	0.249492	0.0788286	-3.66514	0.00290794	0.0213279	down	yes
TraesCS4B02G072200	0.148111	0.241569	0.117264	0.717171	0.595652	0.635527	0.260191	-1.94235	7.22316e-06	0.000119706	down	yes
TraesCS7A02G179400	0.264973	0.23316	0.454076	0.762832	0.702206	0.793028	0.421692	-1.24574	0.00323758	0.0232545	down	yes
TraesCS2B02G292300	1.43413	1.04565	1.04	1.9716	2.8894	2.96159	0.44995	-1.15216	0.000701938	0.0065497	down	yes
TraesCS2B02G072600	0.024611	0.025359	0	0.152252	0.170926	0.473857	0.0626949	-3.99551	0.000362961	0.00370818	down	yes
TraesCS7B02G371700	0	0	0	0.018642	0	0.186512	0.00146232	-9.41753	0.00630704	0.0398806	down	yes
TraesCS3D02G230600	8.69488	9.5988	10.1703	23.2473	21.0491	20.4018	0.43995	-1.18459	3.5396e-34	1.16466e-31	down	yes
TraesCS3B02G021900	0	0	0	0.033322	0.088674	0.042609	0.00182254	-9.09983	0.00177364	0.014241	down	yes
TraesCS7B02G311200	0.059211	0.117727	0.050118	0.386557	0.228072	0.241449	0.265228	-1.91469	0.00163821	0.0133434	down	yes
TraesCS3A02G260300	1.02065	1.14915	1.25516	3.88071	4.1086	3.731	0.292225	-1.77485	3.5684e-20	3.98366e-18	down	yes
TraesCS3B02G293300	1.89811	2.56089	1.48971	5.23173	5.35857	4.83056	0.385757	-1.37423	1.5364e-10	6.07622e-09	down	yes
TraesCS3D02G260400	1.63747	1.09826	1.3207	3.62093	2.38259	2.98756	0.451162	-1.14828	1.74807e-05	0.000261733	down	yes
TraesCS2A02G330500	0	0	0.01391	0.102327	0.013166	0.196321	0.0446099	-4.48649	0.0012448	0.0106083	down	yes
TraesCS4B02G390800	0	0	0	0.033631	0.054247	0.124433	0.00141302	-9.467	9.60065e-05	0.0011766	down	yes
TraesCS4B02G390900	0	0	0	0.053354	0.042098	0.070365	0.00180922	-9.11041	0.0019904	0.0156486	down	yes
TraesCS4D02G044800	1.00997	1.15814	0.993132	2.28623	3.31623	2.01789	0.414841	-1.26937	1.62281e-05	0.000245101	down	yes
TraesCS1D02G430700	0.753917	1.24476	1.43464	3.56443	5.96336	4.19209	0.250244	-1.9986	7.04726e-17	5.85629e-15	down	yes
TraesCS6D02G099100	0.648527	1.19192	1.14189	3.23734	2.03037	3.27538	0.349094	-1.51831	5.55529e-07	1.1941e-05	down	yes
TraesCS6B02G138700	0.114455	0.365697	0.432212	1.68853	0.812906	1.1503	0.249845	-2.0009	3.13716e-05	0.000437555	down	yes
TraesCS3B02G278400	0.052029	0.177998	0.275081	0.619203	0.7395	0.895379	0.224086	-2.15788	0.000214176	0.00236212	down	yes
TraesCS3B02G526700	0.338739	0.391155	0.709038	1.0344	1.46792	1.15071	0.393902	-1.34409	0.000806078	0.00734508	down	yes
TraesCS4A02G293500	0.139976	0.100361	0.140258	0.379631	0.238703	0.707555	0.287049	-1.80063	0.0015804	0.0129491	down	yes
TraesCS1A02G422500	0	0	0	0.114008	0	0.120201	0.00128091	-9.60862	0.00254081	0.0191537	down	yes
TraesCS3B02G524700	0.10272	0	0.210227	0.352911	0.524843	0.753338	0.191863	-2.38185	0.00418289	0.028734	down	yes
TraesCS3A02G481500	0.123206	0.51726	0.939627	1.05343	2.53417	0.970957	0.346621	-1.52857	0.00616364	0.0391781	down	yes
TraesCS5D02G327400	0	0.026278	0	0.083499	0.2486	0.104128	0.0602393	-4.05315	0.00710467	0.0437664	down	yes
TraesCS3D02G478200	1.5373	1.2677	1.0662	3.02203	2.21844	2.71981	0.486314	-1.04004	4.49957e-05	0.000601265	down	yes
TraesCS4B02G276600	0.12652	0.181117	0.118563	0.407933	0.319506	0.47879	0.353333	-1.5009	0.00420099	0.0288364	down	yes
TraesCS7A02G181500	0	0	0	0.04676	0.019762	0.07845	0.00206937	-8.9166	0.00823491	0.0492942	down	yes
TraesCS1A02G187100	1.04003	0.526428	0.362268	1.42008	1.6836	1.35519	0.432559	-1.20903	0.000543771	0.00526739	down	yes
TraesCS1D02G422800	0.266322	0.218461	0.310904	0.897449	0.59338	0.780968	0.350246	-1.51356	1.50281e-05	0.000228677	down	yes
TraesCS1D02G207000	0.441368	0.300275	0.568624	1.09552	0.905058	0.887517	0.45368	-1.14025	0.00515041	0.0339677	down	yes
TraesCS4B02G320400	0.174464	0.26151	0.178108	0.562993	0.468115	0.790717	0.33707	-1.56888	0.000516598	0.00504263	down	yes
TraesCS7A02G299300	0	0	0.050827	0.233055	0.17706	0.1079	0.0981188	-3.34933	0.00471753	0.0316444	down	yes
TraesCS5D02G206500	1.18549	0.951468	0.78599	2.05113	2.80161	1.91209	0.432081	-1.21063	5.89794e-08	1.54326e-06	down	yes
TraesCS5D02G217200	0.075596	0.226095	0.155257	1.13479	1.40222	1.02702	0.128211	-2.96341	1.89018e-14	1.23388e-12	down	yes
TraesCS5D02G217400	0.135456	0.241368	0.320805	0.841852	1.18174	1.32433	0.208377	-2.26273	3.86555e-09	1.25263e-07	down	yes
TraesCS5A02G214600	0.170871	0.353232	0.218619	0.605561	1.52423	1.25317	0.219548	-2.18739	1.44098e-07	3.45462e-06	down	yes
TraesCS5A02G214800	0.216557	0.29197	0.103701	0.441477	1.2281	0.968672	0.232059	-2.10744	1.09167e-05	0.000172276	down	yes
TraesCS1D02G372600	0.196709	0.141728	0.135512	1.04875	0.951959	1.12724	0.151521	-2.72241	4.95738e-12	2.39676e-10	down	yes
TraesCS1D02G372700	0.511643	0.326714	0.527783	2.05047	2.06252	1.48682	0.243962	-2.03527	3.5884e-11	1.55706e-09	down	yes
TraesCS1B02G385200	0.399937	0.287994	0.688086	1.50356	1.86379	2.09956	0.251699	-1.99023	3.60568e-08	9.79743e-07	down	yes
TraesCS3B02G288100	1.14588	1.60356	1.08058	3.91688	2.53365	3.05818	0.402791	-1.3119	4.95112e-08	1.31199e-06	down	yes
TraesCS1B02G384900	0.554038	0.504033	0.869953	1.98996	1.78478	1.70317	0.351963	-1.5065	2.74212e-07	6.28123e-06	down	yes
TraesCS1D02G372500	0.040589	0.254446	0.021698	0.925412	0.753552	0.680662	0.13423	-2.89722	4.54521e-06	7.92191e-05	down	yes
TraesCS3B02G289500	0.042576	0.050758	0.320695	1.293	0.617212	0.720623	0.157375	-2.66772	1.7082e-05	0.000256378	down	yes
TraesCS1B02G385300	0.090926	0.082507	0.084753	0.523039	0.437186	0.329829	0.200136	-2.32095	0.000194996	0.00218018	down	yes
TraesCS3A02G256300	0.299245	0.150326	0.273166	1.22724	0.63981	0.495347	0.305934	-1.70871	0.000264187	0.00282848	down	yes
TraesCS3D02G256600	0.122319	0.311674	0.171441	0.991451	0.36708	0.722588	0.290918	-1.78132	0.000352549	0.00362138	down	yes
TraesCS1A02G367000	0.062269	0.061557	0.105513	0.27587	0.32155	0.532525	0.202965	-2.3007	0.000375251	0.00381779	down	yes
TraesCS3A02G255700	0.459563	0.753159	0.887733	2.24275	1.00414	1.53879	0.438904	-1.18802	0.00073171	0.00677307	down	yes
TraesCS1A02G367100	0.046463	0	0	0.289278	0.221435	0.130521	0.0724587	-3.7867	0.0012685	0.0107748	down	yes
TraesCS1A02G367200	0	0	0	0.080305	0.059903	0.041539	0.00165065	-9.24275	0.00276508	0.0205096	down	yes
TraesCS1D02G372900	0.263948	0.39193	0.12944	0.617992	0.739782	0.631698	0.394737	-1.34104	0.00470663	0.0315895	down	yes
TraesCS5A02G532300	0	0	0.060372	0.377845	0.449572	0.294034	0.0538338	-4.21534	3.60328e-05	0.000494338	down	yes
TraesCS4D02G357200	0.406558	0.517086	0.253082	2.39143	1.24759	0.759485	0.267529	-1.90223	4.13327e-05	0.000557728	down	yes
TraesCS5A02G532200	0	0	0	0.067822	0.129207	0.0503	0.00121296	-9.68725	0.00177515	0.0142489	down	yes
TraesCS7A02G335600	0	0	0	0.119126	0.045211	0.095011	0.00115675	-9.75571	0.00117356	0.0100886	down	yes
TraesCS6D02G008900	0	0	0	0.36486	0.264606	0.358438	0.000303673	-11.6852	3.2355e-09	1.06069e-07	down	yes
TraesCS7A02G348600	1.73486	2.94494	2.28522	4.38146	5.43154	4.56968	0.484265	-1.04613	1.5598e-07	3.72518e-06	down	yes
TraesCS3D02G254400	1.54752	1.82376	1.52084	3.29827	4.25414	2.46179	0.488519	-1.03351	2.04044e-05	0.000299009	down	yes
TraesCS6B02G041300	1.14391	1.11713	0.920981	2.22913	1.88588	2.33326	0.493469	-1.01897	5.80425e-05	0.000756013	down	yes
TraesCS7D02G104100	0.068964	0.056819	0	0.156724	0.273395	0.447875	0.143262	-2.80327	0.00152862	0.0125934	down	yes
TraesCS4B02G043700	0	0	0	0.17975	0.075676	0.028696	0.00105588	-9.88733	0.00303466	0.022072	down	yes
TraesCS1A02G335100	0	0	0	0.059636	0.208539	0.101526	0.000811467	-10.2672	7.8873e-05	0.000989376	down	yes
TraesCS1D02G337500	0.0255886	0.0401031	0	0.0807686	0.372983	0.232511	0.095724	-3.38498	0.000551181	0.00532457	down	yes
TraesCS4A02G308900	0.062717	0.129917	0.068171	0.262202	0.44947	0.228487	0.277405	-1.84993	0.00366656	0.0257865	down	yes
TraesCS1D02G281700	0.970939	0.94357	1.49378	0.576438	0.530499	0.552947	2.05333	1.03797	0.00312413	0.0225854	up	yes
TraesCS1A02G282400	0.449221	0.613404	1.16622	0.355104	0.304901	0.052099	3.12994	1.64613	0.00628335	0.0397463	up	yes
TraesCS3D02G275500	2.56407	2.71016	3.63681	0.707908	0.945102	0.609181	3.93912	1.97787	5.86653e-21	7.11618e-19	up	yes
TraesCS3A02G275600	2.04374	2.83424	3.74133	1.38795	1.45858	1.07715	2.19674	1.13536	1.34263e-07	3.24467e-06	up	yes
TraesCS2A02G205900	69.506	60.0245	55.0772	21.7977	26.5071	22.817	2.59566	1.3761	6.00609e-24	9.1581e-22	up	yes
TraesCS2B02G233100	30.2774	26.5384	25.0491	10.0043	12.3193	10.992	2.45725	1.29705	9.53267e-24	1.4347e-21	up	yes
TraesCS2D02G210300	25.8474	25.1052	23.9523	7.6029	10.1217	9.06631	2.79591	1.48332	9.98051e-16	7.42798e-14	up	yes
TraesCS7A02G183000	1.93193	1.32003	1.5562	0.367015	0.4254	0.310051	4.36128	2.12475	4.46436e-13	2.47326e-11	up	yes
TraesCS3D02G440900	4.02107	3.59364	4.88168	1.28489	2.01974	2.15921	2.28711	1.19353	1.79534e-07	4.24406e-06	up	yes
TraesCS6B02G406000	0.464478	0.681118	1.47605	0.357212	0.143332	0.101045	4.35787	2.12362	7.98276e-05	0.00100058	up	yes
TraesCS6B02G406200	0.431291	0.355761	0.839317	0.295217	0.13738	0.094799	3.08377	1.6247	0.00404235	0.0279196	up	yes
TraesCS6A02G274900	4.64876	5.38242	5.93737	0.790657	0.710598	1.56394	5.20963	2.38118	4.94998e-20	5.45114e-18	up	yes
TraesCS1D02G420400	1.91353	2.1639	1.67002	0.478861	0.797784	0.251689	3.7606	1.91096	2.48547e-08	6.95589e-07	up	yes
TraesCS1B02G443300	1.47159	1.14019	1.24347	0.291864	0.708928	0.126131	3.42105	1.77444	6.60281e-05	0.000847479	up	yes
TraesCS7B02G044200	6.00688	4.33202	3.47173	2.13075	2.44235	1.31773	2.34443	1.22924	2.28895e-09	7.69344e-08	up	yes
TraesCS1B02G085100	23.3113	17.4936	17.732	9.27986	11.3737	8.53874	2.00522	1.00376	2.52851e-16	1.97025e-14	up	yes
TraesCS1B02G472700	1.93003	2.17821	2.27759	0.680404	0.716706	0.907725	2.77062	1.47021	1.28992e-06	2.57011e-05	up	yes
TraesCS2D02G374600	4.16321	3.43517	2.83214	1.0349	1.45316	0.751257	3.21998	1.68705	1.96779e-13	1.14561e-11	up	yes
TraesCS3B02G525300	0.196696	0.326407	1.10565	0.039164	0.138679	0.050378	7.13672	2.83526	8.25258e-06	0.000134869	up	yes
TraesCS3D02G475800	0.338939	0.46149	1.43973	0.384403	0.269132	0.294013	2.36416	1.24133	0.00527569	0.0346309	up	yes
TraesCS2D02G107600	65.9586	61.7712	79.4339	26.6267	33.5667	33.2675	2.21658	1.14834	2.78347e-31	7.46595e-29	up	yes
TraesCS7A02G474400	11.2205	9.36009	8.92428	5.17885	4.62181	4.92268	2.00395	1.00285	1.27589e-16	1.02871e-14	up	yes
TraesCS2A02G571700	3.42056	4.73217	3.34738	1.72682	2.24607	1.19717	2.22437	1.15339	6.4275e-07	1.36319e-05	up	yes
TraesCS2A02G573500	1.76908	1.99079	2.39707	0.689169	1.20985	0.55203	2.51197	1.32882	7.98149e-06	0.000130939	up	yes
TraesCS2B02G124600	15.944	14.2357	19.9098	5.46434	9.30501	5.8357	2.43094	1.28151	9.95959e-06	0.000158993	up	yes
TraesCS5D02G046500	0.262162	0.556038	0.574414	0.09626	0.071506	0	8.30093	3.05327	0.000110706	0.00133313	up	yes
TraesCS7D02G369400	21.469	21.9642	20.6375	7.54897	9.34349	14.5682	2.03654	1.02612	0.000224558	0.0024606	up	yes
TraesCS3D02G517800	1.18728	1.59111	2.46957	0.568568	1.07676	0.717938	2.22063	1.15097	0.000467899	0.00463068	up	yes
TraesCS3A02G497400	0.027593	0.140534	0.14987	0	0	0	1059.99	10.0498	0.000675713	0.00633354	up	yes
TraesCS3A02G378900	0.070542	0.047024	0.100517	0	0	0	726.943	9.5057	0.00133736	0.0112609	up	yes
TraesCSU02G137300	1.42937	0.703332	1.12806	0.387438	0.286419	0.718255	2.34231	1.22793	0.00144249	0.0120216	up	yes
TraesCS2A02G107300	0.118363	0.755787	0.564799	0	0.091565	0.153811	5.86426	2.55195	0.00325749	0.0233789	up	yes
TraesCS2D02G153100	0.493236	0.581117	1.05958	0.190331	0.349079	0.425355	2.21187	1.14527	0.00607051	0.0387164	up	yes
TraesCS2A02G395000	6.62225	6.3689	7.81061	1.77305	2.23463	1.55408	3.74015	1.90309	8.38895e-31	2.20643e-28	up	yes
TraesCS2D02G392800	7.27866	5.58587	7.64019	1.82524	3.25289	2.14746	2.83779	1.50477	3.23628e-14	2.05967e-12	up	yes
TraesCS5A02G257600	0.585794	0.898819	0.343171	0.228464	0.244189	0.0741643	3.34259	1.74097	0.00823486	0.0492942	up	yes
TraesCS2D02G073900	2.03045	1.71296	2.79732	0.839924	0.799449	0.513567	3.03805	1.60314	6.21099e-12	2.96134e-10	up	yes
TraesCS2A02G075200	0.465714	0.318537	0.431779	0.198167	0.087177	0.059757	3.52369	1.81709	0.00034696	0.00357481	up	yes
TraesCS3A02G273000	4.38877	4.49182	4.85635	1.36195	1.49129	2.9776	2.35591	1.23628	8.46719e-08	2.14777e-06	up	yes
TraesCS5A02G309600	0.500223	0.700805	0.658619	0.215473	0.338633	0.192273	2.49156	1.31705	0.000541771	0.00524926	up	yes
TraesCS2D02G559600	0.748973	0.692053	0.766304	0	0.046278	0	47.6972	5.57583	0.00167172	0.0135688	up	yes
TraesCS2A02G011200	0.192171	0.107515	0.069456	0	0.024627	0.018765	8.50714	3.08867	0.00518638	0.0341447	up	yes
TraesCS6B02G197300	0.187107	0.352411	2.21076	0.175235	0.133557	0.062877	7.39981	2.88749	2.3285e-05	0.000335774	up	yes
TraesCS3D02G487200	0.822442	0.711999	1.27657	0.29923	0.212992	0.084931	4.70736	2.23492	9.98631e-05	0.0012179	up	yes
TraesCS5B02G244800	1.5915	1.00789	0.72336	0.097205	0.188324	0.128234	8.03056	3.0055	8.56486e-12	4.00508e-10	up	yes
TraesCS5A02G247600	0.873297	1.27589	0.64729	0.097606	0.429299	0.212362	3.78277	1.91944	0.000123125	0.00146445	up	yes
TraesCS5D02G254100	0.2427	0.327962	0.538081	0.10964	0.045446	0	7.14921	2.83778	0.000558432	0.00538437	up	yes
TraesCS3D02G001500	0.459416	0.319331	1.5665	0.366418	0.059147	0.241657	3.51494	1.8135	0.00648549	0.0407964	up	yes
TraesCS1B02G274500	4.40112	5.18518	4.29429	1.46083	2.44823	1.25893	2.68588	1.4254	3.54337e-12	1.74426e-10	up	yes
TraesCS7A02G259100	34.6438	28.9304	23.906	8.24603	9.40346	7.26452	3.51129	1.812	6.99073e-49	5.7389e-46	up	yes
TraesCS7B02G156900	7.63432	6.31497	4.94268	2.1952	1.27409	1.66215	3.68161	1.88034	2.36801e-22	3.20221e-20	up	yes
TraesCS3A02G355000	29.3806	31.6171	27.2215	6.98129	14.1256	8.13853	3.01651	1.59288	9.70647e-07	1.98406e-05	up	yes
TraesCS3D02G349000	70.3961	64.9376	63.5328	20.5565	39.4608	17.6768	2.55961	1.35592	0.000281633	0.00299006	up	yes
TraesCS7B02G085800	7.66158	5.19843	4.09144	2.95976	1.46775	2.69229	2.38089	1.2515	8.01471e-08	2.0432e-06	up	yes
TraesCS7D02G182600	5.7739	2.56124	3.82468	1.63552	1.71518	1.72636	2.39505	1.26006	1.15879e-07	2.83666e-06	up	yes
TraesCS3A02G492100	3.55045	3.73583	3.97194	1.68486	1.23463	1.82612	2.37235	1.24632	1.42162e-13	8.44574e-12	up	yes
TraesCS4B02G285600	1.15258	0.449763	0.147094	0	0	0	5831.46	12.5096	2.36795e-10	9.16421e-09	up	yes
TraesCS5A02G238100	2.49368	1.60392	0.10677	0	0	0	14014.6	13.7746	5.76481e-07	1.23391e-05	up	yes
TraesCS6A02G319300	8.8469	7.55953	7.11547	0.028824	0.190951	0	107.027	6.74183	1.19191e-06	2.39064e-05	up	yes
TraesCS5D02G245000	5.76904	2.61335	0.045481	0	0	0	28092.9	14.7779	7.95849e-06	0.000130588	up	yes
TraesCS7D02G231200	0.866948	1.17065	1.03088	0.494226	0.44142	0.30353	2.47623	1.30814	1.19523e-05	0.000186769	up	yes
TraesCS5B02G236600	13.5708	8.29978	0.669279	0.163113	0.033452	0	114.669	6.84133	7.69298e-05	0.000968588	up	yes
TraesCS6D02G298500	1.93092	1.49028	0.789506	0	0.046544	0	90.4671	6.49932	8.34333e-05	0.00104048	up	yes
TraesCS7B02G286700	6.62242	5.24045	2.69618	0.303669	0.625565	0.025668	15.2466	3.93042	0.00017316	0.00197091	up	yes
TraesCS6B02G349800	6.46281	1.35293	3.03241	0.02205	0.208663	0	47.0201	5.5552	0.000575349	0.0055238	up	yes
TraesCS6D02G313500	16.6051	13.812	14.5966	1.63865	2.76566	0.149242	9.88539	3.3053	0.000657545	0.00618877	up	yes
TraesCS6B02G349500	11.4238	4.66959	5.96641	0.075071	0.461475	0	41.1145	5.36157	0.00104999	0.00917972	up	yes
TraesCS2D02G039300	251.425	244.154	291.949	51.3613	101.182	66.0384	3.6029	1.84916	9.12223e-10	3.23324e-08	up	yes
TraesCS2A02G040700	520.752	475.397	608.626	120.416	226.964	161.303	3.15477	1.65753	4.62688e-09	1.47813e-07	up	yes
TraesCS4D02G142000	0	0.984667	0	0	0	0	3282.22	11.6805	1.15318e-07	2.82718e-06	up	yes
TraesCS2B02G053200	867.951	823.027	1018	196.577	405.543	255.922	3.15717	1.65863	3.10376e-07	7.00496e-06	up	yes
TraesCS2D02G057000	603.324	601.574	699.851	243.433	385.633	317.173	2.01297	1.00933	3.84277e-07	8.54371e-06	up	yes
TraesCS2A02G040500	535.729	483.942	605.968	127.352	269.057	160.806	2.91743	1.5447	5.76395e-06	9.78378e-05	up	yes
TraesCS2B02G368900	5.31425	2.76001	3.66731	0.505213	1.44267	0.597692	4.61253	2.20556	1.83171e-05	0.0002724	up	yes
TraesCS1B02G368300	33.1025	30.8383	39.6183	11.8133	22.1124	13.7406	2.17258	1.11941	0.000195825	0.00218794	up	yes
TraesCS4B02G143500	53.8316	52.2761	62.6845	17.042	36.8903	26.2174	2.10596	1.07448	0.00057365	0.00551083	up	yes
TraesCS2A02G350400	5.66165	6.61408	4.2848	1.96636	3.52958	1.59509	2.33542	1.22368	0.00116981	0.0100627	up	yes
TraesCS3A02G374600	0.050415	0.109199	0.014227	0	0	0	579.47	9.17859	0.00124158	0.0105882	up	yes
TraesCS3A02G111600	0.382191	0.256977	0.229454	0.061587	0.114218	0.050011	3.84659	1.94358	0.00160542	0.0131105	up	yes
TraesCS7B02G273500	0.405173	0.766796	0.761342	0.368875	0.198647	0.338748	2.13326	1.09306	0.00740083	0.0452037	up	yes
TraesCS1B02G244800	1.17942	1.34877	1.78567	0.272081	0.216072	0.321363	5.32895	2.41385	2.41657e-15	1.73247e-13	up	yes
TraesCS7A02G227300	1.59732	1.61788	1.51072	0.337444	0.468125	0.462018	3.72828	1.89851	5.85437e-13	3.20618e-11	up	yes
TraesCS2B02G493300	0.699994	0.731458	0.831403	0.087965	0.114219	0.224575	5.30242	2.40665	3.06841e-07	6.93481e-06	up	yes
TraesCS5B02G294500	1.16492	0.904621	1.88339	0.377918	0.473458	0.557913	2.80492	1.48796	2.67423e-06	4.9373e-05	up	yes
TraesCS2A02G588300	135.376	132.695	120.789	66.9198	61.5003	61.6679	2.04568	1.03258	1.49307e-76	6.06723e-73	up	yes
TraesCS3B02G028500	0.922376	0.46615	0.090377	0	0	0	4929.68	12.2673	6.86607e-11	2.84559e-09	up	yes
TraesCS2B02G595000	87.0004	78.0547	53.6361	23.1229	24.9448	14.0397	3.52118	1.81606	8.82517e-10	3.13479e-08	up	yes
TraesCS2D02G565000	90.6641	80.1848	52.2027	31.7583	25.2834	18.8659	2.93846	1.55506	1.10347e-07	2.71432e-06	up	yes
TraesCS2D02G489200	7.94667	2.07811	2.61703	0.880574	0.777213	0.435867	6.03816	2.59411	7.28882e-05	0.000923856	up	yes
TraesCS2B02G516700	6.47898	2.67389	3.25794	0.652088	1.50628	0.847627	4.12869	2.04568	7.66899e-05	0.000965868	up	yes
TraesCS6D02G033800	1.4078	0.592345	0.703126	0.392789	0.248054	0.086046	3.71896	1.8949	0.000139596	0.00163524	up	yes
TraesCS6B02G187100	0.104677	0.033953	0.033752	0	0	0	574.607	9.16643	0.000450548	0.00448026	up	yes
TraesCS2A02G488900	5.81784	0.287479	0.617053	0.133742	0.232115	0.132559	13.4874	3.75355	0.00136469	0.0114637	up	yes
TraesCS1B02G142700	0.411038	0.461834	0.285888	0.144231	0.159399	0.101104	2.86302	1.51754	0.000668776	0.00627964	up	yes
TraesCS5A02G391500	18.7451	16.6454	11.2316	4.40031	4.6426	4.084	3.55165	1.82849	3.72724e-35	1.33445e-32	up	yes
TraesCS5D02G401300	2.28101	2.17671	1.05369	0.255084	0.290507	0.333383	6.27028	2.64853	4.89599e-15	3.39222e-13	up	yes
TraesCS1A02G342700	3.5826	4.5079	4.65696	1.7227	1.312	0.858148	3.27459	1.71131	1.64083e-11	7.43745e-10	up	yes
TraesCS5A02G165400	5.09563	5.65247	3.87971	2.34784	1.68227	1.83886	2.4924	1.31754	5.03283e-11	2.13369e-09	up	yes
TraesCS5D02G169600	2.07689	0.907955	1.66506	0.537746	0.608926	0.858754	2.31866	1.21329	0.00160363	0.0130998	up	yes
TraesCS2D02G379000	7.60972	7.50553	5.78256	1.94503	1.86312	1.81416	3.71694	1.89412	6.42157e-36	2.43876e-33	up	yes
TraesCS2B02G400000	5.77377	3.21105	4.05514	1.3857	1.19884	1.50449	3.18902	1.67311	3.64128e-15	2.55336e-13	up	yes
TraesCS2A02G382700	8.00999	6.07816	5.09541	3.53451	2.52824	2.74903	2.17704	1.12236	4.35582e-11	1.86614e-09	up	yes
TraesCS2D02G344200	2.16572	1.69322	0.965264	0.46735	0.600621	0.475241	3.12608	1.64436	5.74045e-09	1.80479e-07	up	yes
TraesCS2B02G364000	0.912363	0.509463	0.332421	0.081868	0.050075	0	13.2955	3.73287	3.90333e-08	1.05533e-06	up	yes
TraesCS1D02G392500	0.820894	0.610312	0.405825	0.262777	0.248747	0.162219	2.7266	1.44711	7.88997e-05	0.000989558	up	yes
TraesCS2B02G626400	0.77049	0.669321	0.666259	0.172884	0.574349	0.288788	2.03284	1.0235	0.00567634	0.0367328	up	yes
TraesCS7D02G523800	3.62791	3.57079	4.2263	1.97664	1.16707	1.0935	2.69635	1.43101	1.7046e-12	8.75706e-11	up	yes
TraesCS4B02G237600	0.774564	1.01974	1.8526	0.110743	0.912109	0.276086	2.80761	1.48934	0.0051985	0.0342117	up	yes
TraesCS3D02G348900	2.85241	4.30201	3.96899	0.938581	2.34966	1.56202	2.29336	1.19746	8.6035e-06	0.000140069	up	yes
TraesCS3A02G354900	0.889562	0.350179	0.557899	0.027412	0.122326	0.125113	6.54042	2.70938	2.1546e-05	0.00031359	up	yes
TraesCS4A02G401700	11.309	10.1381	10.2735	4.80816	4.38013	3.43395	2.51307	1.32945	1.06451e-23	1.59916e-21	up	yes
TraesCS5B02G315700	7.61583	5.52003	4.95335	1.43552	1.66189	1.14319	4.26573	2.09279	2.79802e-26	5.2156e-24	up	yes
TraesCS5D02G321100	25.8031	15.773	13.5065	6.72882	5.02602	4.64991	3.35773	1.74748	1.05619e-07	2.60987e-06	up	yes
TraesCS5A02G314800	10.2582	7.83546	6.12654	3.4243	1.6317	1.77896	3.54357	1.8252	2.21114e-06	4.1714e-05	up	yes
TraesCS3A02G408400	2.72437	3.27408	3.00474	0.438716	0.662289	0.831601	4.65858	2.21989	1.32449e-17	1.17515e-15	up	yes
TraesCS3D02G403500	0.188316	0.214184	0.110121	0.021799	0.026804	0	10.5471	3.39878	0.00227259	0.0174788	up	yes
TraesCS6D02G142200	13.2973	11.7124	9.77671	4.22103	3.83646	3.48203	3.01455	1.59194	1.07426e-50	1.0152e-47	up	yes
TraesCS5A02G006400	0	0	1.03381	0	0	0	3446.04	11.7507	7.71981e-08	1.97173e-06	up	yes
TraesCS3D02G227100	3.99012	2.80135	3.92742	1.26731	1.63832	2.33184	2.04658	1.03321	1.55062e-05	0.000235291	up	yes
TraesCS4A02G095200	0.854489	1.20988	0.517962	0.380151	0.325743	0.529092	2.09098	1.06418	0.00209738	0.0163729	up	yes
TraesCS3A02G077100	5.34881	5.68084	10.5753	1.70823	2.67718	1.37081	3.75333	1.90817	6.02689e-06	0.000101791	up	yes
TraesCS3A02G383800	0.093187	0.155464	0.130611	0	0	0	1264.21	10.304	0.000992864	0.00876421	up	yes
TraesCS7A02G435500	1.55793	1.74113	1.25016	0.563232	0.590859	0.429235	2.87321	1.52266	3.26681e-05	0.000453459	up	yes
TraesCS2A02G318000	2.28018	1.82664	2.48413	0.918404	1.29243	0.55947	2.37914	1.25044	0.00632782	0.0399871	up	yes
TraesCS2B02G270300	0.833455	0.504853	0.228463	0.142664	0.154531	0.313056	2.56742	1.36032	0.00565351	0.0366188	up	yes
TraesCS4A02G093000	0.074586	0.057889	0.062603	0	0	0	650.26	9.34487	0.000479768	0.00473029	up	yes
TraesCS4B02G263200	1.41053	1.23426	1.09924	0.663482	0.541281	0.40355	2.32793	1.21905	0.00139145	0.0116584	up	yes
TraesCS2B02G073100	0.020216	0.060986	0.107455	0	0	0	628.857	9.29659	0.00313928	0.0226767	up	yes
TraesCS3A02G151300	2.25811	1.04528	2.44483	0.278546	0.329376	0.284136	6.44378	2.68791	6.86848e-21	8.23327e-19	up	yes
TraesCS3D02G159200	8.12193	7.35547	9.64294	4.14542	4.60395	3.5277	2.04612	1.03289	1.22365e-18	1.18958e-16	up	yes
TraesCS3B02G178200	3.83068	2.63183	4.31281	1.58007	1.57998	1.22012	2.46002	1.29867	1.65529e-13	9.74137e-12	up	yes
TraesCS4B02G205700	0.974998	0.786184	0.91111	0.131171	0.385162	0.330231	3.15663	1.65839	4.84317e-06	8.39621e-05	up	yes
TraesCS3D02G352400	0.337832	0.190011	0.174513	0.053731	0.014706	0.06836	5.13429	2.36017	0.000377356	0.00383527	up	yes
TraesCS3D02G351900	0.35897	0.234402	0.228547	0.064247	0	0.092601	5.24023	2.38963	0.00169613	0.0137285	up	yes
TraesCS3B02G390700	0.266082	0.342726	0.186453	0.112534	0.055528	0.087341	3.11375	1.63865	0.00247197	0.0187129	up	yes
TraesCS4D02G336700	0.25549	0.251351	0.431887	0.0548517	0.100506	0.0536902	4.4905	2.16688	0.000500117	0.0049071	up	yes
TraesCS6B02G412100	0.131176	0.071026	0.116425	0	0	0	1062.09	10.0527	0.000799407	0.00729633	up	yes
TraesCS6D02G358900	0.246035	0.088852	0.043898	0	0	0	1262.62	10.3022	0.00300546	0.0219244	up	yes
TraesCS2D02G253900	0	0.23665	0.199485	0	0	0	1453.78	10.5056	0.00395182	0.0274295	up	yes
TraesCS2A02G124200	37.2713	31.2417	40.8191	15.5103	18.7359	17.6261	2.10772	1.07568	1.30454e-22	1.80004e-20	up	yes
TraesCS4B02G205400	4.81122	4.08622	5.09054	1.54203	2.14303	0.828813	3.09889	1.63175	6.69318e-09	2.07384e-07	up	yes
TraesCS1D02G274200	6.48143	2.62472	3.17136	2.20661	1.76798	1.32434	2.31698	1.21224	1.18791e-05	0.000185839	up	yes
TraesCS3D02G370700	1.83595	1.18375	1.47548	0.587941	0.521847	1.002	2.12861	1.08991	0.000710634	0.00661804	up	yes
TraesCS2A02G375100	1.00651	0.651619	0.7559	0.06588	0.22286	0.190794	5.03412	2.33174	2.34278e-06	4.39627e-05	up	yes
TraesCS2A02G375200	1.78544	1.13808	1.39989	0.839182	0.762185	0.501407	2.05605	1.03988	0.000931997	0.00831567	up	yes
TraesCS2D02G371600	1.12241	0.482839	0.459756	0.306573	0.154579	0.280625	2.78386	1.47709	0.00370138	0.0259976	up	yes
TraesCS2A02G375300	0.189217	0.069128	0	0	0	0	861.15	9.75012	0.00491738	0.0327363	up	yes
TraesCS1A02G264900	6.07739	5.59765	5.60313	2.89773	3.01808	2.6043	2.02793	1.02001	4.64659e-11	1.98131e-09	up	yes
TraesCS3A02G418000	0.970969	0.834928	1.3136	0.277743	0.482652	0.391502	2.70814	1.4373	8.20285e-05	0.00102532	up	yes
TraesCS2D02G033200	0.824148	0.336674	0.578627	0	0.0360395	0.0270623	27.5658	4.78481	4.29412e-15	2.99821e-13	up	yes
TraesCS2B02G047400	0.170446	0.12943	0.069626	0	0.018695	0.025202	8.41748	3.07339	0.000940921	0.00838493	up	yes
TraesCS2B02G445500	37.7534	36.5651	37.5474	15.9146	21.7043	8.78512	2.41069	1.26945	0.00017177	0.00195712	up	yes
TraesCS2A02G027200	102.059	85.3244	96.7881	39.0666	65.8201	28.8197	2.12534	1.08769	0.00207799	0.0162294	up	yes
TraesCS2B02G445200	8.41513	8.00808	7.31664	3.97255	5.56279	2.0141	2.0555	1.03949	0.0082958	0.0495711	up	yes
TraesCS2B02G445400	6.59008	5.89216	5.77501	2.35676	3.10514	3.12431	2.12634	1.08837	1.17682e-15	8.69477e-14	up	yes
TraesCS2B02G445300	49.6055	48.7718	49.719	22.2721	26.6187	14.6496	2.33074	1.22079	1.19064e-07	2.90938e-06	up	yes
TraesCS2D02G335000	3.90383	4.79009	5.03519	1.89891	2.03887	2.36973	2.17662	1.12209	3.0067e-11	1.31731e-09	up	yes
TraesCS2A02G327900	3.68112	3.34794	3.56828	1.51949	1.52964	1.03356	2.59568	1.37611	3.68414e-11	1.59689e-09	up	yes
TraesCS2B02G354100	3.14591	2.64478	3.08931	1.28428	1.4352	1.39916	2.15605	1.10839	1.04655e-08	3.13742e-07	up	yes
TraesCS5D02G403700	4.80933	5.62885	4.12376	2.59219	2.61472	1.94574	2.03588	1.02565	3.14649e-10	1.19664e-08	up	yes
TraesCS7B02G104700	4.45276	2.89615	4.2227	1.75294	1.57665	1.60617	2.34445	1.22925	1.47502e-09	5.07312e-08	up	yes
TraesCS5A02G394500	0.340158	0.380121	0.633982	0.067921	0.04696	0.066644	7.46047	2.89927	2.04991e-07	4.80115e-06	up	yes
TraesCS5D02G336900	1.85528	1.03218	2.03165	0.488753	0.345539	0.475689	3.7551	1.90885	2.38283e-09	7.96615e-08	up	yes
TraesCS7D02G050500	0.593171	1.03869	0.765658	0	0	0	7991.73	12.9643	1.04612e-13	6.30245e-12	up	yes
TraesCS3A02G407800	1.20031	0.963666	0.963326	0.337595	0.093103	0.158914	5.304	2.40708	2.7179e-08	7.54145e-07	up	yes
TraesCS2B02G413000	3.5274	2.31762	2.29604	1.20962	1.20023	0.805097	2.53226	1.34043	1.82829e-07	4.31191e-06	up	yes
TraesCS3B02G592000	0.868653	0.688069	0.586949	0.321693	0.400497	0.119731	2.54617	1.34833	0.00207578	0.0162136	up	yes
TraesCS6D02G310700	0.093017	0.173034	0	0	0	0	886.837	9.79252	0.00356877	0.0252363	up	yes
TraesCS4B02G365000	0.032797	0.056669	0.108801	0.009615	0	0	20.6206	4.36601	0.00175676	0.014132	up	yes
TraesCS2B02G150600	0.9364	0.95235	0.995103	0.395029	0.426094	0.567478	2.0768	1.05437	6.53336e-08	1.69642e-06	up	yes
TraesCS5B02G247700	3.37121	3.20374	2.96569	1.35397	2.13005	1.11877	2.07279	1.05158	1.0465e-07	2.59224e-06	up	yes
TraesCS2B02G606700	2.58993	2.87746	3.11334	0.422037	1.15371	0.612769	3.9208	1.97115	5.18595e-06	8.90122e-05	up	yes
TraesCS1D02G013600	11.0896	9.90183	14.6999	4.69388	4.49768	4.23917	2.65743	1.41003	2.42621e-22	3.27547e-20	up	yes
TraesCS1B02G019700	1.50936	1.04638	1.32933	0.336213	0.711618	0.584091	2.38067	1.25137	0.000201986	0.00224536	up	yes
TraesCS1D02G013400	2.16329	1.5581	2.42365	0.480255	0.86882	1.4483	2.19671	1.13535	0.00073422	0.00679166	up	yes
TraesCS5A02G004700	13.9183	14.9382	20.1057	8.74869	6.90243	7.82671	2.08547	1.06037	5.82888e-17	4.88376e-15	up	yes
TraesCS5A02G004600	0.521838	0.369379	0.69277	0.113312	0.157661	0.171027	3.58368	1.84144	4.31061e-05	0.000579061	up	yes
TraesCS5A02G004500	0.156865	0.626108	0.771037	0.212538	0.065515	0.087524	4.25084	2.08775	0.000516579	0.00504263	up	yes
TraesCS3A02G097900	0.39703	0.385199	0.438058	0.150586	0.074021	0.203989	2.84717	1.50953	0.00445578	0.0302442	up	yes
TraesCS1A02G305500	0.309174	0.374249	0.328685	0.111409	0.077447	0.109212	3.39557	1.76365	0.00180816	0.0144738	up	yes
TraesCS7A02G134100	2.55906	1.10288	0.9462	0.369078	0.368605	0.25673	4.63402	2.21226	6.7939e-13	3.68594e-11	up	yes
TraesCS7D02G133500	1.99539	0.593683	0.811955	0.153496	0.350434	0.2208	4.69281	2.23045	0.000284251	0.00301234	up	yes
TraesCS7B02G035200	1.11208	0.298803	0.347382	0.225161	0.224756	0.201557	2.6989	1.43237	0.00119113	0.0102126	up	yes
TraesCS6D02G264400	0.443647	0.425943	0.278389	0.028324	0.015506	0.159691	5.64059	2.49585	0.00189282	0.015036	up	yes
TraesCS2D02G063400	8.03638	5.93579	3.12637	1.12742	0.869385	0.575027	6.64841	2.73301	4.58157e-22	6.06439e-20	up	yes
TraesCS5A02G443500	0.531274	0.464825	0.35253	0.252674	0.153362	0.108458	2.62127	1.39027	0.000493803	0.00485453	up	yes
TraesCS2A02G105900	4.04378	3.51646	3.52348	2.19897	2.1214	1.18767	2.01228	1.00883	6.01412e-07	1.28356e-05	up	yes
TraesCS5A02G004800	1.54763	2.45327	3.25264	0.555132	0.4021	0.122656	6.71693	2.7478	4.30301e-12	2.0941e-10	up	yes
TraesCS3B02G434900	4.45796	4.01639	4.80821	1.70189	1.1221	1.44019	3.11492	1.63919	2.14326e-14	1.39016e-12	up	yes
TraesCS3D02G396800	6.95266	5.921	7.3581	3.51433	2.96537	3.41468	2.04477	1.03194	9.70186e-11	3.94048e-09	up	yes
TraesCS3A02G401900	3.59935	3.7649	5.83492	2.82049	1.15995	1.75298	2.30215	1.20298	1.43181e-05	0.000219186	up	yes
TraesCS2D02G181300	1.77948	2.30072	3.18185	0.84807	0.916553	1.1813	2.46512	1.30166	9.95026e-07	2.02981e-05	up	yes
TraesCS2A02G177200	0.404314	0.448415	0.593244	0.103851	0.129165	0.180836	3.49394	1.80485	0.000855161	0.00773347	up	yes
TraesCS2A02G481400	0.379467	0.355139	0.513071	0	0.094427	0.018237	11.0743	3.46915	0.000984943	0.00871131	up	yes
TraesCS6B02G191500	0.542776	0.428192	0.619254	0.068647	0.154199	0.223437	3.56326	1.8332	0.00674978	0.0420939	up	yes
TraesCS2A02G321700	0.12153	0.15909	0.093584	0	0	0	1247.35	10.2846	0.00147252	0.0122217	up	yes
TraesCS4A02G095500	1.63597	1.68448	0.963878	0.0426136	0.243942	0.38486	6.38103	2.67379	1.82581e-07	4.30732e-06	up	yes
TraesCS2A02G013200	11.9139	11.9916	9.16121	5.25102	5.5612	4.8598	2.10992	1.07719	1.58264e-21	1.98495e-19	up	yes
TraesCS2B02G004400	1.4357	1.75509	2.2542	0.745953	0.730597	0.715413	2.48407	1.31271	4.79759e-08	1.27463e-06	up	yes
TraesCS2B02G022600	0.232017	0	0.579685	0	0	0	2705.67	11.4018	0.00213234	0.0165889	up	yes
TraesCS6D02G365700	158.456	159.288	190.252	65.3667	76.9156	74.6173	2.34208	1.22779	1.43826e-55	1.88533e-52	up	yes
TraesCS6D02G366200	58.4329	53.2005	68.6121	22.0583	26.8664	24.8396	2.44353	1.28897	1.68267e-43	9.69886e-41	up	yes
TraesCS6B02G420200	51.2339	46.0969	54.7609	21.1676	22.7602	25.9055	2.17792	1.12295	8.63086e-40	4.0313e-37	up	yes
TraesCS6A02G380700	58.4617	61.6553	64.0806	26.4631	35.2215	29.3142	2.02418	1.01734	1.02221e-25	1.8021e-23	up	yes
TraesCS6B02G420300	11.3803	12.5884	12.3614	4.26379	5.21671	3.18507	2.86842	1.52026	1.09914e-18	1.07367e-16	up	yes
TraesCS6D02G366000	15.8995	13.7634	20.3394	5.18767	6.47503	8.1687	2.52137	1.33421	8.14248e-17	6.69116e-15	up	yes
TraesCS7B02G298900	3.07088	4.17132	4.46876	1.06175	1.67274	1.06455	3.08261	1.62415	7.14919e-12	3.38595e-10	up	yes
TraesCS6A02G381400	36.4946	36.8016	54.7995	11.6391	12.1397	16.0454	3.21653	1.6855	2.85878e-11	1.25589e-09	up	yes
TraesCS7A02G396600	0.685924	0.200607	0.671854	0.081437	0.100397	0.139409	4.85111	2.27831	0.000229997	0.00251005	up	yes
TraesCS7B02G298700	0.101096	0.049095	0.179534	0	0	0	1099.08	10.1021	0.000383157	0.00388714	up	yes
TraesCS5B02G223700	1.94513	0.755065	0.985975	0.507523	0.678113	0.119009	2.82542	1.49847	0.00270285	0.0201252	up	yes
TraesCS1A02G019900	0.032137	0.174401	0.151576	0	0.024753	0	14.4675	3.85474	0.00817042	0.048984	up	yes
TraesCS7B02G019100	0.035929	0.049533	0.03556	0	0	0	403.407	8.65609	0.000102196	0.00124224	up	yes
TraesCS4D02G269500	6.54364	5.05513	10.6473	2.15196	2.40582	3.97769	2.60631	1.38201	0.000713003	0.00663771	up	yes
TraesCS5D02G038800	0.200715	0.412351	0.465382	0.185472	0.117902	0.072678	2.86782	1.51995	0.00232892	0.0178294	up	yes
TraesCS4D02G064500	10.6646	9.28216	8.48903	4.70083	5.05988	3.91219	2.07972	1.05639	4.05431e-15	2.8332e-13	up	yes
TraesCS4A02G343700	0.06679	0.048281	0.061742	0	0	0	589.377	9.20305	0.00229454	0.0176209	up	yes
TraesCS7B02G195400	0.073594	0.05377	0.649037	0.049271	0.019993	0.026767	8.0849	3.01523	0.00084165	0.00763571	up	yes
TraesCS5B02G570100	0.95723	1.05331	1.01314	0.465551	0.483318	0.389698	2.2589	1.17562	2.06741e-05	0.000302478	up	yes
TraesCS5D02G561500	1.18677	1.18164	0.90215	0.3024	0.559531	0.625358	2.19901	1.13685	0.000544478	0.00527172	up	yes
TraesCS3B02G549000	0.146006	0.275673	0.515137	0.051386	0	0.048081	9.41836	3.23548	4.04114e-05	0.000547113	up	yes
TraesCS3B02G549200	0.11525	0.515464	0.432443	0.125967	0.089542	0.077303	3.63085	1.86031	0.00127916	0.0108517	up	yes
TraesCS5B02G566100	16.8957	16.5912	13.847	7.06493	6.24592	4.73255	2.62334	1.3914	1.05905e-22	1.47888e-20	up	yes
TraesCS6B02G288400	0.469928	0.524811	0.559221	0.179846	0.282125	0.290532	2.06505	1.04618	0.0003278	0.00340254	up	yes
TraesCS5A02G049400	1.60456	1.31463	0.565023	0	0.033665	0	103.497	6.69344	7.54038e-13	4.0638e-11	up	yes
TraesCS5D02G060200	1.85145	1.14894	0.978703	0.121361	0.089863	0.15236	10.9441	3.45208	1.7657e-12	9.04805e-11	up	yes
TraesCS5B02G054600	3.16849	1.44851	0.957748	0.222459	0.230685	0.070228	10.6516	3.413	1.9505e-11	8.73394e-10	up	yes
TraesCS6A02G236100	0.874767	0.64704	0.393605	0.041851	0.136218	0	10.7566	3.42715	9.61184e-06	0.000154204	up	yes
TraesCS5A02G025300	45.0215	43.9035	53.394	20.4531	23.5751	25.1237	2.05806	1.04129	5.27639e-29	1.19449e-26	up	yes
TraesCS7A02G301100	0	0	1.13733	0	0	0	3791.1	11.8884	9.9848e-08	2.49304e-06	up	yes
TraesCS2B02G174400	4.33021	3.69265	10.1651	1.92428	2.63501	0.891206	3.33694	1.73852	0.00507402	0.033551	up	yes
TraesCS2D02G154300	30.9725	24.6465	54.4016	14.4839	19.792	7.12926	2.65717	1.40989	0.00576899	0.0371902	up	yes
TraesCS7D02G038500	1.57114	2.23554	1.7952	0.746662	0.769957	1.26893	2.01105	1.00795	8.85783e-06	0.000143605	up	yes
TraesCS6A02G120500	0.317773	0.213453	0.213837	0.044178	0.022117	0	11.2386	3.49039	0.00011585	0.0013889	up	yes
TraesCS3B02G474700	0.150753	0.086529	0.068044	0	0	0	1017.75	9.99117	0.00613051	0.0390103	up	yes
TraesCS7D02G295400	2.43135	2.10917	2.77579	1.35031	0.955622	1.01264	2.20466	1.14055	4.20494e-11	1.80435e-09	up	yes
TraesCS6B02G288500	0.654946	0.471091	0.712494	0.123203	0.088529	0.15088	5.07024	2.34205	2.37261e-07	5.50295e-06	up	yes
TraesCS7B02G478200	1.04966	0.979649	0.883631	0.44577	0.193161	0.468733	2.6298	1.39495	9.8305e-06	0.000157273	up	yes
TraesCS6A02G261100	0.88597	0.825568	0.896552	0.446004	0.35947	0.331684	2.29352	1.19756	3.50259e-05	0.00048297	up	yes
TraesCS4A02G474100	0.570458	0.499762	0.143264	0.112975	0.0725795	0.0620367	4.90115	2.29312	0.000728804	0.00675386	up	yes
TraesCS4A02G268500	0.249295	0.055825	0.369073	0	0	0	2247.31	11.134	1.92809e-08	5.53319e-07	up	yes
TraesCS4B02G045700	0.079311	0.100896	0.204663	0	0	0.033679	11.4276	3.51445	0.00374014	0.0262223	up	yes
TraesCS5A02G077600	4.17128	5.16159	6.18251	0.814583	2.56063	2.07449	2.84702	1.50945	7.58984e-07	1.58327e-05	up	yes
TraesCS3A02G530900	0.035955	0	0.293915	0	0	0	1099.57	10.1027	0.00670464	0.0418928	up	yes
TraesCS6B02G141400	12.9347	7.69958	7.81898	3.30153	1.95615	1.78266	4.04146	2.01488	1.23025e-07	2.99267e-06	up	yes
TraesCS6D02G102400	19.699	10.5885	9.83341	3.95302	2.39249	2.35924	4.60909	2.20448	1.26751e-07	3.07684e-06	up	yes
TraesCS6A02G112800	17.5081	11.0253	8.61616	5.22529	4.2849	3.63501	2.82609	1.49881	5.96577e-06	0.000100863	up	yes
TraesCS4D02G010700	0.639266	0.94821	1.02882	0.226269	0.496678	0.474809	2.18433	1.12719	0.0062324	0.0395255	up	yes
TraesCS4B02G094600	0.349992	0.307045	0.538479	0.253294	0.220556	0.111382	2.04281	1.03055	0.00758762	0.0461124	up	yes
TraesCS2A02G283000	0.925057	0.528298	0.988017	0.331062	0.192314	0.171247	3.51467	1.81339	0.000154597	0.00179082	up	yes
TraesCS7D02G493800	0.234914	0	0.330592	0	0	0	1885.02	10.8804	0.00391273	0.0272065	up	yes
TraesCS2B02G170700	0.147172	0.037229	0.115387	0.010832	0	0.027322	7.85732	2.97404	0.00358069	0.025303	up	yes
TraesCS7D02G528900	0.022023	0.047489	0.795521	0.006651	0.011132	0.060285	11.0805	3.46995	0.0040292	0.0278524	up	yes
TraesCS3A02G279100	0.077242	0.103462	0.094442	0	0	0	917.153	9.84102	0.000298796	0.00314149	up	yes
TraesCS1A02G424000	0.325271	0.332682	0.636494	0.121966	0.130294	0.193907	2.90126	1.53668	0.00220665	0.0170718	up	yes
TraesCS3D02G053900	0.100956	0.440482	0.293157	0.045291	0.089632	0.058852	4.30703	2.10669	0.00377317	0.0264196	up	yes
TraesCS3B02G597000	3.7468	3.6948	3.46364	0.820601	1.88212	1.62481	2.51997	1.3334	6.72654e-09	2.0818e-07	up	yes
TraesCS6A02G260900	4.18047	3.58681	5.59383	1.08284	1.47648	1.41864	3.35879	1.74794	5.79908e-17	4.86883e-15	up	yes
TraesCS6D02G241700	0.823436	0.924659	1.16463	0.214703	0.169875	0.157589	5.37238	2.42556	6.96896e-11	2.88529e-09	up	yes
TraesCS6B02G288300	0.676027	0.450062	1.18274	0.139014	0.052648	0.154823	6.66356	2.73629	5.65938e-07	1.21423e-05	up	yes
TraesCS3B02G486400	0.14505	0.090915	0.198918	0	0	0	1449.61	10.5014	7.99702e-06	0.000131167	up	yes
TraesCS2A02G524900	0.491408	0.846449	0.870387	0.196506	0.028628	0.236983	4.77854	2.25657	0.000160444	0.0018488	up	yes
TraesCS2B02G449600	0.204089	0.160738	0.033891	0.026973	0	0	14.7821	3.88578	0.0057298	0.0369992	up	yes
TraesCS2B02G145000	0.428684	0.528747	0.599594	0.124155	0.268589	0.027555	3.70457	1.8893	0.00451286	0.0305465	up	yes
TraesCS7A02G137000	0.314825	0.306892	0.279801	0.0400439	0.0951156	0.11321	3.62975	1.85987	0.00109865	0.00953232	up	yes
TraesCS6B02G135700	1.48004	0.914203	0.893916	0.270061	0.163161	0.501149	3.51912	1.81521	5.50952e-05	0.000720814	up	yes
TraesCS5A02G518800	0.989121	1.33002	0.81258	0.170925	0.11533	0.478986	4.09246	2.03297	0.000939377	0.00837209	up	yes
TraesCS4A02G182600	0.205378	0.340228	0.153123	0	0	0.0436275	16.0158	4.00142	0.00415053	0.0285455	up	yes
TraesCS2D02G447500	1.99098	1.04141	1.28509	0.674895	0.674012	0.425951	2.43258	1.28249	0.000125802	0.00149106	up	yes
TraesCS2B02G469100	1.1153	1.54728	1.32875	0.684159	0.568169	0.46358	2.32607	1.2179	0.000297377	0.00313062	up	yes
TraesCS2A02G448400	0.732232	0.924313	0.28028	0.186631	0.068822	0.223469	4.04413	2.01583	0.000360971	0.0036911	up	yes
TraesCS5A02G027300	1.44058	1.26692	1.69563	0.709579	0.89484	0.478991	2.11342	1.07958	0.000203429	0.00225985	up	yes
TraesCS2D02G450400	0.179912	0.137402	0.04997	0	0	0	1224.28	10.2577	3.53372e-05	0.000486272	up	yes
TraesCS2B02G608900	2.33442	2.19176	2.6947	0.865297	0.721954	0.823673	2.99507	1.58259	1.20879e-11	5.54719e-10	up	yes
TraesCS4D02G038800	0.543469	0.992441	0.793716	0.442246	0.497125	0.194176	2.05516	1.03925	0.00562448	0.036464	up	yes
TraesCS7A02G435000	0.162009	0.220434	0.221023	0.062531	0.074148	0.010718	4.09415	2.03357	0.00126757	0.0107681	up	yes
TraesCS7A02G117100	0.785775	0.83999	0.983385	0.369803	0.455218	0.215351	2.5079	1.32648	0.000911147	0.00815502	up	yes
TraesCS3D02G106600	0.463404	0.529041	0.483597	0.208518	0.13496	0.258484	2.45205	1.29399	0.0021456	0.0166757	up	yes
TraesCS7D02G497800	0.782606	0.440835	0.873701	0.22589	0.297215	0.288366	2.58437	1.36981	0.000562354	0.00541705	up	yes
TraesCS3D02G496600	14.5829	15.3726	22.7739	5.89615	8.99874	6.04572	2.51804	1.3323	1.59141e-13	9.39947e-12	up	yes
TraesCS3B02G551600	1.46115	3.3315	4.98073	0.326489	0.768791	1.1937	4.26975	2.09415	5.07631e-06	8.74628e-05	up	yes
TraesCS3D02G496800	1.8847	1.57112	1.55624	0.725374	0.579593	0.679761	2.52531	1.33646	8.40881e-05	0.0010472	up	yes
TraesCS1D02G091300	0.732424	0.473667	0.814044	0.096851	0.030691	0	15.839	3.98541	8.20816e-07	1.70177e-05	up	yes
TraesCS5A02G153400	0.40119	0.374941	0.691578	0.038763	0	0	37.8637	5.24274	0.000262779	0.00281489	up	yes
TraesCS7D02G133400	1.88359	1.52692	1.64199	0.900419	0.755386	0.85219	2.01456	1.01046	0.00029414	0.00309936	up	yes
TraesCS7A02G134000	0.624399	0.432478	0.754648	0.058527	0.198627	0.232845	3.697	1.88635	0.000734986	0.0067972	up	yes
TraesCS5B02G237500	3.06155	1.5207	2.27159	0.866211	1.14502	1.07413	2.22141	1.15147	0.00255861	0.0192612	up	yes
TraesCS7B02G105100	5.65189	5.38911	9.11907	0.748645	1.55733	1.08037	5.95334	2.5737	6.60457e-21	7.92942e-19	up	yes
TraesCS7B02G105000	6.61495	7.22768	11.8907	2.88201	5.39877	4.09852	2.07874	1.05571	1.1164e-05	0.000175755	up	yes
TraesCS2B02G403600	1.85543	3.96631	3.95928	0.937834	1.83497	0.613211	2.88866	1.5304	0.000225197	0.00246627	up	yes
TraesCS7D02G099600	0.445827	0.320927	0.816462	0.199823	0.061619	0.081709	4.61376	2.20594	0.0028932	0.0212581	up	yes
TraesCS7B02G105200	19.6518	14.662	31.1756	2.38863	10.5051	3.35406	4.03067	2.01102	0.00370183	0.0259986	up	yes
TraesCSU02G226400	1.55406	2.51613	1.45092	0.688756	0.859047	0.80911	2.34252	1.22806	0.0038398	0.02681	up	yes
TraesCS7A02G198900	3.94146	10.5206	13.4347	0.532104	3.79521	1.4467	4.83144	2.27245	0.00826543	0.0494268	up	yes
TraesCS6B02G034700	0	0	0.215738	0	0	0	719.127	9.4901	7.26957e-08	1.87144e-06	up	yes
TraesCS3A02G536200	2.21262	1.58798	1.80422	0.835428	1.0575	0.84314	2.04849	1.03456	3.54601e-07	7.91951e-06	up	yes
TraesCS3B02G088100	0.456887	0.31224	0.477455	0.114182	0.085306	0.116675	3.94285	1.97924	9.953e-06	0.000158949	up	yes
TraesCS5A02G533700	1.37777	1.10512	1.39634	0.579137	0.598987	0.717114	2.04683	1.03339	3.50182e-05	0.000482946	up	yes
TraesCS2A02G564800	0.483114	0.639391	1.00513	0.287545	0.410255	0.150931	2.50684	1.32587	7.50122e-05	0.000947527	up	yes
TraesCS1B02G366500	0.047161	0.035322	0.056303	0	0	0	462.62	8.85368	0.000110199	0.00132742	up	yes
TraesCS7A02G046300	0.671939	0.588564	0.737087	0.26522	0.328085	0.334331	2.15342	1.10663	0.00245698	0.0186272	up	yes
TraesCS6A02G403300	0.172295	0.202009	0.293229	0.08152	0.079185	0.107546	2.48846	1.31526	0.00684495	0.0425633	up	yes
TraesCS5B02G494800	0.205523	0.204091	0.23893	0.048833	0.04026	0.098836	3.45101	1.78702	0.00223778	0.0172633	up	yes
TraesCS6A02G059700	2.31371	1.67653	1.95535	0.527512	0.570591	1.06065	2.75418	1.46162	2.74644e-07	6.28756e-06	up	yes
TraesCS6B02G080100	1.15589	0.611074	1.42585	0.396046	0.276947	0.299054	3.28463	1.71573	2.32078e-05	0.000334838	up	yes
TraesCSU02G122100	1.85221	2.12053	2.27706	0.853928	0.749542	1.51844	2.00191	1.00138	0.000121497	0.001447	up	yes
TraesCS3D02G513900	0.08167	0.062702	0.075611	0	0	0	733.277	9.51821	0.00133711	0.0112599	up	yes
TraesCS6B02G110200	6.14287	4.72694	4.00588	2.65735	2.46876	2.17355	2.03786	1.02705	4.34813e-07	9.58192e-06	up	yes
TraesCS3B02G131200	0.335022	0.223208	0.037756	0	0	0	1986.62	10.9561	0.000225832	0.00247222	up	yes
TraesCS7A02G183800	0.773131	1.0777	2.03027	0.501169	0.577666	0.111327	3.26098	1.70531	0.000537995	0.0052189	up	yes
TraesCS3B02G130500	0.113361	0.298731	0.038562	0	0	0	1502.18	10.5528	0.00172764	0.0139378	up	yes
TraesCS3D02G114900	0.180082	0.119532	0.214849	0	0	0	1714.88	10.7439	0.004736	0.0317551	up	yes
TraesCS1B02G373100	6.25032	5.88154	6.37955	2.95474	3.73346	2.47909	2.01929	1.01385	5.48554e-11	2.30876e-09	up	yes
TraesCS3D02G361100	2.62555	2.75727	2.05397	0.976979	1.14069	0.909189	2.45694	1.29686	1.88733e-06	3.61081e-05	up	yes
TraesCS3B02G399800	0.21069	0.464605	0.574531	0.073677	0	0	16.9636	4.08437	0.000128953	0.00152418	up	yes
TraesCS3A02G368100	1.92569	2.19555	1.99876	1.16128	0.952705	0.778702	2.11568	1.08112	0.000129023	0.00152479	up	yes
TraesCS1D02G396900	0.734488	0.835241	0.960676	0.216824	0.531531	0.334436	2.33693	1.22461	0.00441483	0.0300278	up	yes
TraesCS5D02G124300	0.0478172	0.0434249	0.6652	0.0303488	0.0419391	0.0611272	5.66984	2.50331	0.00189814	0.0150655	up	yes
TraesCS2B02G312600	1.13485	0.247495	0.662535	0	0.069397	0	29.4664	4.881	0.00016877	0.00192907	up	yes
TraesCS4A02G408400	1.05873	1.14528	1.10454	0.023419	0.039911	0.451962	6.42073	2.68274	0.00529771	0.034739	up	yes
TraesCS4B02G332500	0.086375	0.430219	0.181651	0	0	0	2327.48	11.1846	1.61317e-06	3.14177e-05	up	yes
TraesCS6B02G411000	4.77289	4.28901	5.00681	0.456456	0.349238	0.370111	11.9652	3.58077	2.85646e-43	1.61215e-40	up	yes
TraesCS6A02G373300	4.76715	6.21737	8.88665	0.216357	0.459225	0.613828	15.4111	3.94589	3.85493e-39	1.75027e-36	up	yes
TraesCS1D02G119500	14.0642	16.4807	20.7298	6.61048	5.72759	7.99	2.52236	1.33478	2.93595e-20	3.33535e-18	up	yes
TraesCS1B02G138100	20.0629	19.4972	25.0624	8.63425	10.34	11.5082	2.11999	1.08406	3.38665e-19	3.50623e-17	up	yes
TraesCS6D02G357500	0.889797	1.02064	1.9957	0.31876	0.263171	0.068782	6.00286	2.58565	5.70505e-06	9.69799e-05	up	yes
TraesCS5B02G280100	1.89123	1.89227	1.59071	0.744448	0.999169	0.768832	2.13903	1.09696	4.26714e-07	9.41622e-06	up	yes
TraesCS3B02G335300	27.3269	28.283	28.955	1.42337	1.33017	1.03334	22.331	4.48098	0	0	up	yes
TraesCS3D02G300600	29.4509	33.4816	33.7198	4.35708	4.76308	4.65567	7.01608	2.81067	1.4217e-270	5.77722e-266	up	yes
TraesCS3A02G301200	31.7304	34.275	34.43	6.13821	6.64312	6.42644	5.2289	2.38651	2.17428e-247	5.89026e-243	up	yes
TraesCS7D02G059300	0.372551	0.584068	0.251946	0.115596	0.152249	0.138217	2.97631	1.57352	0.00105658	0.00922644	up	yes
TraesCS2D02G377800	1.68678	1.69196	1.74613	0.130191	0.177115	0	16.6768	4.05977	4.50604e-09	1.44293e-07	up	yes
TraesCS7A02G315400	10.9089	14.2195	13.7748	6.44631	6.08167	6.45325	2.04956	1.03532	2.02675e-07	4.75376e-06	up	yes
TraesCS7D02G072600	1.53696	0.988381	1.25688	0.603525	0.488437	0.358125	2.60828	1.3831	0.000236328	0.00256914	up	yes
TraesCS2B02G522400	0.949889	0.711209	0.852964	0.4033	0.076996	0.086275	4.43733	2.14969	0.000352678	0.00362225	up	yes
TraesCS4A02G375500	1.83296	1.39519	0.701013	0.212593	0.364067	0.110691	5.71638	2.5151	0.000541534	0.00524759	up	yes
TraesCS2D02G494800	1.67949	1.2353	1.6423	0.706276	0.384031	0.870275	2.32436	1.21683	0.000761281	0.00699979	up	yes
TraesCS2D02G494500	3.00409	1.79844	1.89603	0.362112	0.593454	1.27331	3.00535	1.58753	0.00213515	0.0166087	up	yes
TraesCS7A02G273400	0.739208	0.835275	1.63813	0.339448	0.403043	0.336384	2.97775	1.57422	0.00217049	0.0168257	up	yes
TraesCS2D02G494600	2.52418	3.41445	3.30112	0.293927	0.900645	1.96341	2.92584	1.54885	0.00263202	0.0197079	up	yes
TraesCS2A02G494400	1.43761	1.50304	2.30483	0.667768	0.452875	0.770762	2.77333	1.47162	0.0029325	0.0214809	up	yes
TraesCS2B02G522600	1.0651	0.472339	0.517677	0.048565	0.134105	0.114904	6.90624	2.7879	0.00301952	0.0220013	up	yes
TraesCS2B02G398600	1.84846	1.52833	1.04142	0.668359	0.617874	0.189925	2.99305	1.58162	0.00487325	0.0325118	up	yes
TraesCS2A02G494900	2.73114	2.06908	1.5353	0.633262	0.917232	1.13596	2.35832	1.23776	0.00550989	0.0358814	up	yes
TraesCS2D02G494400	1.35087	1.07011	1.96696	0.303822	0.63159	0.529999	2.99433	1.58223	0.00709246	0.0437045	up	yes
TraesCS2B02G523100	1.05991	1.46034	1.0543	0.178784	0.217313	0.664057	3.37173	1.75349	0.00744894	0.0454429	up	yes
TraesCS1A02G122300	5.48809	2.82214	3.99986	1.99474	2.37591	0.787862	2.38636	1.25481	0.00108794	0.00945354	up	yes
TraesCS5B02G068000	0.683692	0.476198	0.368259	0.172793	0.199837	0.059632	3.53524	1.82181	0.00109707	0.00952079	up	yes
TraesCS4A02G242600	0.120322	0.129706	0	0	0	0	833.427	9.70291	0.0026334	0.0197128	up	yes
TraesCS2D02G552200	5.22791	5.32744	6.10269	1.70879	3.58957	2.85147	2.04397	1.03138	4.06978e-06	7.19511e-05	up	yes
TraesCS3B02G150400	0.559128	1.01876	0.299577	0.142642	0.21465	0.125672	3.88739	1.9588	0.000709394	0.0066094	up	yes
TraesCS3A02G307000	0.520646	0.493878	0.445597	0.164324	0.071383	0.19088	3.4228	1.77518	0.00496116	0.0329415	up	yes
TraesCS3D02G238000	1.15119	1.59198	1.70523	0.630691	0.851691	0.394687	2.36986	1.2448	4.0481e-05	0.000547963	up	yes
TraesCS2B02G023600	0.566159	0.509237	0.146308	0.140981	0.034818	0.055069	5.29179	2.40375	0.000451246	0.00448662	up	yes
TraesCS5D02G206700	1.29325	1.81422	1.43037	0.323831	0.871616	0.136142	3.40784	1.76886	0.00347512	0.0246793	up	yes
TraesCS2A02G000400	0.078479	0.212921	0.466884	0.028393	0.029888	0.095222	4.93986	2.30447	0.00438581	0.0298666	up	yes
TraesCS3B02G266200	0.560609	0.539787	0.927207	0.229747	0.327619	0.339205	2.26151	1.17729	0.00491647	0.0327354	up	yes
TraesCS5B02G075800	1.50357	1.25133	1.55266	0.582858	0.919435	0.625987	2.02396	1.01718	0.000337425	0.00348807	up	yes
TraesCS7A02G427300	3.64234	3.37977	3.56736	1.15621	1.90623	0.638195	2.86153	1.51679	9.59856e-08	2.40621e-06	up	yes
TraesCS7B02G327400	27.3411	29.3122	29.5143	8.43889	16.9286	10.0624	2.43206	1.28218	3.94511e-05	0.000535807	up	yes
TraesCS7D02G419400	51.805	60.4246	51.792	16.599	31.8699	16.0246	2.54323	1.34666	9.87618e-05	0.00120664	up	yes
TraesCS3A02G145300	0.516879	0.745062	0.689048	0.264992	0.222484	0.464139	2.05019	1.03576	0.00421999	0.0289399	up	yes
TraesCS4B02G002000	1.52912	1.71006	2.87435	0.327248	0.761149	0.467888	3.92828	1.9739	2.49245e-07	5.75801e-06	up	yes
TraesCS4A02G001300	1.02519	1.56391	1.51578	0.259007	0.339063	0.847038	2.84054	1.50617	0.000244889	0.00264486	up	yes
TraesCS4B02G055500	0.11718	0.153675	0.198607	0	0	0	1564.87	10.6118	0.000250688	0.00270139	up	yes
TraesCS5B02G523200	3.50162	3.68114	3.96762	1.56577	2.03917	0.699068	2.5907	1.37334	8.17832e-07	1.69688e-05	up	yes
TraesCS2D02G196200	0.934136	0.977683	0.871477	0.578584	0.302352	0.451129	2.08946	1.06313	0.00288075	0.0211916	up	yes
TraesCS4A02G025300	9.74976	7.52386	9.9437	2.95255	3.60612	3.39444	2.73455	1.4513	2.64951e-28	5.63694e-26	up	yes
TraesCS2D02G508400	0	0	5.50238	0	0	0	18341.3	14.1628	1.72958e-09	5.90864e-08	up	yes
TraesCS7D02G208500	2.31063	3.18842	2.08937	0.933057	0.977072	1.15212	2.47805	1.30921	1.50659e-08	4.38258e-07	up	yes
TraesCS7A02G205700	2.93777	3.85514	2.45477	1.42228	1.57879	1.33835	2.13109	1.09159	1.78135e-07	4.21712e-06	up	yes
TraesCS2A02G086300	0.344706	0.165314	0.043031	0.020963	0	0	26.3822	4.7215	0.000800091	0.00730126	up	yes
TraesCS2D02G201100	0.085161	0.150627	0.133364	0.007855	0.030281	0.015935	6.82717	2.77129	0.00270107	0.0201156	up	yes
TraesCS4B02G342000	2.19506	2.54321	1.45363	0.632461	0.423281	0.329219	4.47081	2.16054	6.71107e-15	4.5642e-13	up	yes
TraesCS6D02G369400	32.8738	35.4154	40.8954	11.7222	12.0016	15.6925	2.77003	1.4699	2.59428e-46	1.7868e-43	up	yes
TraesCS6B02G423900	14.7493	13.8876	14.8181	5.31817	7.05682	6.47841	2.30489	1.2047	1.07443e-31	2.93023e-29	up	yes
TraesCS7A02G501400	2.80885	3.39656	3.73175	1.06611	1.19607	1.35017	2.75088	1.45989	1.58637e-19	1.68533e-17	up	yes
TraesCS6A02G384600	77.5922	79.4972	90.8639	28.3909	30.2252	38.7937	2.54546	1.34793	1.66464e-17	1.45628e-15	up	yes
TraesCS3D02G267000	2.77567	2.05144	2.47223	0.964182	1.26019	0.874169	2.35573	1.23618	6.61955e-09	2.05337e-07	up	yes
TraesCS3D02G304900	1.06563	1.03819	0.725918	0.505317	0.301012	0.536049	2.10801	1.07588	0.0013659	0.0114715	up	yes
TraesCS5D02G373900	0.937474	1.02581	0.668768	0.110295	0.373708	0.107756	4.44784	2.1531	2.79884e-05	0.000395045	up	yes
TraesCS4B02G172700	0.930723	0.845891	1.05009	0.234581	0.147464	0.296101	4.16828	2.05945	2.03141e-09	6.86758e-08	up	yes
TraesCS5D02G513100	2.81061	2.40026	2.19901	1.28929	0.904246	0.99381	2.32478	1.21709	1.84908e-12	9.45147e-11	up	yes
TraesCS6A02G398600	0.093998	0.1596	0.23775	0	0	0.049793	9.86781	3.30273	0.00364985	0.0256943	up	yes
TraesCS2D02G138400	1.77924	1.30339	2.34783	0.582253	0.528832	0.223078	4.07031	2.02514	1.15686e-09	4.04216e-08	up	yes
TraesCS2B02G606500	3.50442	3.66985	5.71256	1.12391	2.54142	1.11035	2.69843	1.43212	4.8151e-07	1.04971e-05	up	yes
TraesCS2B02G606200	1.12863	0.874927	1.42751	0.158862	0.741776	0.374149	2.69148	1.4284	0.00200574	0.0157482	up	yes
TraesCS5B02G202200	31.7526	30.8179	28.3287	8.4172	9.22471	8.01035	3.54351	1.82518	1.88659e-132	3.83318e-128	up	yes
TraesCS5D02G210000	20.5876	19.6744	20.601	6.04977	7.09499	6.26058	3.1364	1.64911	9.73756e-109	1.13056e-104	up	yes
TraesCS6A02G351300	15.4936	14.5503	14.185	4.02959	4.59251	3.47046	3.65754	1.87087	6.32886e-79	3.02564e-75	up	yes
TraesCS6B02G384500	15.139	13.0801	12.3494	4.77358	4.74107	5.0169	2.79174	1.48117	1.58126e-63	3.29519e-60	up	yes
TraesCS5A02G203500	13.5402	11.7652	12.4597	3.66867	4.73025	3.749	3.10878	1.63635	2.29203e-57	3.44959e-54	up	yes
TraesCS6D02G334000	24.7386	19.721	17.9745	8.32599	7.80094	7.1583	2.68128	1.42292	1.2312e-45	8.26961e-43	up	yes
TraesCS2D02G029500	0.547585	0.535299	0.594615	0.086859	0.223193	0.115562	3.94136	1.97869	3.18638e-05	0.00044343	up	yes
TraesCS2A02G027400	0.79935	0.502114	1.23567	0.098682	0.095132	0	13.0906	3.71046	0.0031009	0.0224489	up	yes
TraesCS5B02G054800	0.863305	1.12684	0.647582	0.241315	0.279996	0.454856	2.70212	1.43409	0.000136904	0.00160741	up	yes
TraesCS4B02G257200	1.37876	0.984958	1.35984	0.425404	0.68776	0.195351	2.84564	1.50875	0.000182606	0.00206236	up	yes
TraesCS3B02G210300	1.27956	1.44526	1.18759	0.224079	0.471032	0.404024	3.55954	1.83169	5.04793e-10	1.86226e-08	up	yes
TraesCS3D02G185500	0.933266	0.531127	1.00734	0.196048	0.262376	0.169696	3.93512	1.97641	5.48419e-08	1.44103e-06	up	yes
TraesCS3B02G007400	12.1013	12.8069	11.8789	5.824	5.6831	5.85938	2.11828	1.08289	2.42703e-19	2.54188e-17	up	yes
TraesCS6D02G197100	9.79038	7.37779	6.76042	3.01127	2.34453	3.43238	2.72282	1.4451	1.16855e-11	5.36859e-10	up	yes
TraesCS3A02G006600	1.8734	2.58715	2.10274	0.390786	0.791514	0.57751	3.72954	1.899	2.82198e-08	7.8036e-07	up	yes
TraesCS3D02G004100	1.47537	1.43515	1.74124	0.566691	0.450437	0.642058	2.80364	1.4873	9.26752e-06	0.000149442	up	yes
TraesCS3B02G162000	0.621052	0.572303	0.529684	0.118045	0.278831	0.0827	3.59284	1.84512	0.000400949	0.00404315	up	yes
TraesCS6A02G214400	1.28449	0.622934	1.16571	0.446889	0.369411	0.152729	3.17136	1.6651	0.00184742	0.0147301	up	yes
TraesCS4A02G436200	0.030811	0.02189	0.665411	0	0	0	2393.71	11.225	0.00167817	0.0136089	up	yes
TraesCS6A02G215600	0.314486	0.30169	0.652598	0.064364	0.097011	0.250696	3.07902	1.62247	0.00671438	0.0419311	up	yes
TraesCSU02G085100	1.52787	2.33122	2.48603	0.439659	1.02494	0.74091	2.87694	1.52454	1.03375e-07	2.56847e-06	up	yes
TraesCS7B02G110000	0.058932	0.096612	0.226731	0	0	0	1274.25	10.3154	0.00147998	0.0122673	up	yes
TraesCS7D02G206300	0.598191	0.979922	0.4494	0.229644	0.273122	0.334064	2.42285	1.2767	0.00825098	0.049365	up	yes
TraesCS1B02G429500	1.10251	0.811383	0.622244	0.190964	0.444955	0.230993	2.92548	1.54867	0.000229493	0.0025069	up	yes
TraesCS7B02G134200	13.3709	13.3543	14.6566	6.12233	7.72984	6.56961	2.02636	1.01889	2.86812e-25	4.91768e-23	up	yes
TraesCS6B02G469500	0.049358	0.046186	0	0	0	0	318.48	8.31506	0.00376737	0.0263905	up	yes
TraesCS7D02G339000	0.890446	0.94284	0.661998	0.322859	0.530272	0.264138	2.23338	1.15923	0.0062391	0.0395495	up	yes
TraesCS4D02G180800	1.86414	1.64265	0.656591	0.037503	0.258414	0.049456	12.0547	3.59153	1.82771e-10	7.17245e-09	up	yes
TraesCS1A02G421800	0.494716	0.359021	0.750175	0	0.124759	0.098438	7.18608	2.84521	0.00102735	0.0090148	up	yes
TraesCS7A02G240800	0.580393	0.22973	0.398042	0.118328	0.110686	0.220442	2.68806	1.42657	0.00397692	0.0275679	up	yes
TraesCS7D02G497300	2.49293	2.3568	2.86904	1.16169	0.939995	1.26781	2.29078	1.19584	3.9705e-09	1.28306e-07	up	yes
TraesCS4B02G106400	44.8736	52.8961	51.4434	24.5494	28.937	18.9916	2.05874	1.04176	2.08511e-21	2.59115e-19	up	yes
TraesCS1A02G370100	13.3535	13.8454	16.5822	6.95282	7.12674	5.85118	2.19667	1.13532	5.19986e-20	5.71085e-18	up	yes
TraesCS1B02G389200	14.7138	13.2157	14.5231	5.19991	7.38011	3.46381	2.64604	1.40383	3.2614e-06	5.89024e-05	up	yes
TraesCS3D02G137300	0.413963	0.461287	0.359863	0	0.195621	0.023856	5.62753	2.4925	0.00757847	0.0460706	up	yes
TraesCS7B02G285700	1.42675	2.15643	2.86569	0.966594	0.976976	0.945959	2.23181	1.15821	1.40971e-06	2.78692e-05	up	yes
TraesCS3B02G529700	1.79806	1.10191	2.78219	0.467036	0.916306	0.834483	2.56204	1.35729	0.000156738	0.00181072	up	yes
TraesCS5A02G338400	4.45516	6.20263	8.30529	1.23725	3.48471	2.34555	2.68313	1.42392	0.00197268	0.0155337	up	yes
TraesCS5B02G395600	0.087809	0.268406	0.289238	0	0	0	2151.51	11.0711	0.00450105	0.0304867	up	yes
TraesCS1D02G237500	36.6434	27.6685	13.4786	2.99293	2.91937	1.49723	10.4987	3.39214	7.38264e-12	3.48838e-10	up	yes
TraesCS1A02G234600	10.6621	6.09084	2.81266	0.201779	0.67905	0.279766	16.8583	4.07538	3.10774e-08	8.5415e-07	up	yes
TraesCS1B02G249000	20.3362	11.9496	6.46876	0.942933	1.79476	0.476734	12.0564	3.59173	1.2354e-07	3.00339e-06	up	yes
TraesCS1A02G250000	10.285	9.83424	13.7412	1.93765	2.4262	3.62914	4.23625	2.08279	2.00692e-29	4.79724e-27	up	yes
TraesCS7B02G471500	22.1397	19.3779	21.5701	10.6461	7.35072	6.31182	2.59528	1.37589	1.05216e-21	1.32782e-19	up	yes
TraesCS1B02G260700	1.63942	1.63742	2.04383	0.319056	0.387278	0.459817	4.56259	2.18985	3.58481e-13	2.01483e-11	up	yes
TraesCS1B02G260600	1.08034	1.33951	2.07043	0.14085	0.204419	0.443629	5.69184	2.5089	4.61579e-09	1.47575e-07	up	yes
TraesCS1D02G249600	7.78479	6.44155	10.1421	3.57698	3.00947	4.97747	2.10728	1.07538	1.69077e-08	4.88839e-07	up	yes
TraesCS2A02G558000	0.291805	0.229711	0.094616	0	0	0	2053.77	11.0041	0.000968871	0.00859255	up	yes
TraesCS6B02G366900	5.86737	5.04287	4.33296	2.19547	2.25765	2.51912	2.18627	1.12847	2.13804e-19	2.25081e-17	up	yes
TraesCS4A02G064000	0.27212	0.469911	0.218526	0.072017	0.123133	0.125435	2.99626	1.58316	0.00598294	0.0383022	up	yes
TraesCS4A02G008500	9.39411	9.11464	9.85191	4.69839	4.78556	4.42054	2.03968	1.02834	3.32018e-18	3.13765e-16	up	yes
TraesCS3D02G449300	0.056556	0.140736	0.024928	0	0	0	740.734	9.53281	0.00280363	0.0207425	up	yes
TraesCS3A02G455800	0.611346	0.434965	0.702787	0.243122	0.230856	0.184551	2.65607	1.40929	0.00734626	0.0449311	up	yes
TraesCS6A02G277200	0.818144	1.00589	1.12091	0.553511	0.303942	0.385227	2.36984	1.24479	0.000500096	0.0049071	up	yes
TraesCS6A02G211100	0.290787	0.380712	0.211712	0.062257	0.088782	0	5.84757	2.54784	0.00278649	0.0206375	up	yes
TraesCS2B02G171000	0	0.17429	0.054275	0	0	0	761.883	9.57343	0.00538726	0.0352438	up	yes
TraesCS5D02G217100	0.29683	0.307719	0.243141	0.052674	0.10975	0	5.21899	2.38377	0.00837224	0.0499287	up	yes
TraesCS5B02G228900	0.231402	0.386336	0.272767	0.061599	0	0	14.4565	3.85364	0.00567318	0.0367212	up	yes
TraesCSU02G253900	24.0473	24.3793	26.8954	10.1764	12.2496	8.03303	2.47289	1.3062	8.07747e-27	1.55562e-24	up	yes
TraesCS1B02G481300	54.6965	55.8148	67.526	27.9541	32.2307	24.1498	2.11108	1.07798	4.65409e-26	8.4619e-24	up	yes
TraesCSU02G246000	15.8344	12.9431	17.5633	5.5316	7.24767	4.83747	2.6305	1.39533	2.61484e-20	2.98893e-18	up	yes
TraesCSU02G271000	31.0693	25.5451	29.9987	11.7053	15.3788	10.0792	2.33061	1.22071	4.35405e-10	1.61877e-08	up	yes
TraesCS4B02G384000	4.17703	2.36353	2.7004	0.236315	0.131467	0.659271	8.99755	3.16953	2.64951e-06	4.89722e-05	up	yes
TraesCS1B02G481500	16.0743	15.3079	18.5275	7.56581	9.03904	4.44656	2.37085	1.2454	9.98738e-06	0.000159406	up	yes
TraesCSU02G205900	1.20308	1.04158	1.40394	0.562513	0.56352	0.458495	2.30265	1.20329	2.70734e-05	0.00038353	up	yes
TraesCS6A02G068300	190.357	190.679	178.637	82.0657	75.7527	87.59	2.28058	1.1894	9.6854e-89	6.5596e-85	up	yes
TraesCS6B02G171200	3.04355	3.32304	2.40172	1.30369	1.02456	1.04962	2.59581	1.37618	1.82986e-12	9.36501e-11	up	yes
TraesCS4B02G014000	7.20189	6.25051	7.48747	2.45176	4.40462	2.39457	2.26354	1.17858	5.13795e-10	1.89203e-08	up	yes
TraesCS3B02G144500	2.46439	2.17482	2.58017	0.875858	0.948829	0.744692	2.80978	1.49046	0.000204452	0.00226967	up	yes
TraesCS5A02G387900	0.133592	0.0281969	0.0303236	0	0	0	640.373	9.32277	0.000406899	0.00409326	up	yes

## Sheet: S5
Table S5. the primes for qRT-PCR
gene ID	forward primers	reverse primers
TraesCS2A02G040500	TCGGCATGAGGTCATATTG	GATCCACGTCAGGTTCTAC
TraesCS2D02G107600	CCGTCAACAAGGAGAACC	CCAGACAGCAGAACAGAC
TraesCS2D02G200600	GAGGCATTGGAAGCAGAG	GATGTAACCTGGCATGATTC
TraesCS5A02G008800	ACGGCAAGGAAGATAACG	CAGCACCAGGAATGATGT
TraesCS5D02G014200	GAACACGGCAAGGAAGATA	CCAGCACCAGGAATGATG
TraesCS6D02G366200	GATGATGGCGGAGATTACG	GCTGCTGCTGAAGTTGAG
TraesCS1A02G370100	CGGAGAAGGTGTGACTGA	TGATGGTGAAGCGAGACT
TraesCS3B02G335300	AGGAGGTGATGGACTACG	GCTGAAGTGCTTGGAGAG
TraesCS3D02G300600	AGGAGGTGATGGACTACG	GCTGAAGTGCTTGGAGAG

## Sheet: S6
Table S6. 620 known metabolites among the 7174 metabolites detected
ID	Metabolite	Formula	HMDB	Superclass	Class
pos-0.813_117.07857	betaine	C5H11NO2	HMDB0000043	Organic acids and derivatives	Carboxylic acids and derivatives
pos-0.866_100.05205	betaine	C5H11NO2	HMDB0000043	Organic acids and derivatives	Carboxylic acids and derivatives
pos-0.78_103.06311	gamma-aminobutyric acid	C4H9NO2	HMDB0000112	Organic acids and derivatives	Carboxylic acids and derivatives
pos-3.504_276.15778	n-(4-guanidinobutyl)-4-hydroxycinnamide	C14H20N4O2	HMDB0033460	Phenylpropanoids and polyketides	Cinnamic acids and derivatives
pos-7.439_495.33087	1-palmitoylglycerophosphocholine	C24H50NO7P	HMDB0010382	Lipids and lipid-like molecules	Glycerophospholipids
pos-3.704_121.08893	phenethylamine	C8H11N	HMDB0012275	Benzenoids	Benzene and substituted derivatives
pos-1.291_267.09596	adenosine	C10H13N5O4	HMDB0000050	Nucleosides, nucleotides, and analogues	Purine nucleosides
pos-0.806_115.02646	maleamate	C4H5NO3
pos-0.806_147.05268	l-glutamic acid	C5H9NO4	HMDB0000148	Organic acids and derivatives	Carboxylic acids and derivatives
pos-1.31_131.09428	l-isoleucine	C6H13NO2	HMDB0000172	Organic acids and derivatives	Carboxylic acids and derivatives
pos-1.4_85.08891	piperidine	C5H11N	HMDB0034301	Organoheterocyclic compounds	Piperidines
pos-0.69_129.07861	pipecolic acid	C6H11NO2	HMDB0000070	Organic acids and derivatives	Carboxylic acids and derivatives
pos-1.258_164.04692	2-hydroxycinnamic acid	C9H8O3	HMDB0002641	Phenylpropanoids and polyketides	Cinnamic acids and derivatives
pos-0.792_145.10958	3-dehydroxycarnitine	C7H15NO2	HMDB0001161	Lipids and lipid-like molecules	Fatty Acyls
pos-0.79_105.04214	d-serine	C3H7NO3	HMDB0003406	Organic acids and derivatives	Carboxylic acids and derivatives
pos-1.31_85.08891	piperidine	C5H11N	HMDB0034301	Organoheterocyclic compounds	Piperidines
pos-5.564_352.22137	6-ketoprostaglandin f1	C20H34O6	HMDB0002886	Lipids and lipid-like molecules	Fatty Acyls
pos-0.828_97.97659	orthophosphate	H3O4P	HMDB0001429	Homogeneous non-metal compounds	Non-metal oxoanionic compounds
pos-0.921_97.97659	orthophosphate	H3O4P	HMDB0001429	Homogeneous non-metal compounds	Non-metal oxoanionic compounds
pos-0.888_103.06311	gamma-aminobutyric acid	C4H9NO2	HMDB0000112	Organic acids and derivatives	Carboxylic acids and derivatives
pos-0.855_216.07545	glycerophosphocholine	C8H20NO6P	HMDB0000086	Lipids and lipid-like molecules	Glycerophospholipids
pos-0.792_257.10199	glycerophosphocholine	C8H20NO6P	HMDB0000086	Lipids and lipid-like molecules	Glycerophospholipids
pos-6.615_347.28105	n-arachidonoylethanolamine	C22H37NO2	HMDB0004080	Organic nitrogen compounds	Organonitrogen compounds
pos-2.121_138.03129	3,4-dihydroxybenzaldehyde	C7H6O3	HMDB0059965	Organic oxygen compounds	Organooxygen compounds
pos-0.899_131.09427	l-isoleucine	C6H13NO2	HMDB0000172	Organic acids and derivatives	Carboxylic acids and derivatives
pos-0.794_89.0474	alanine	C3H7NO2	HMDB0000056	Organic acids and derivatives	Carboxylic acids and derivatives
pos-1.846_138.03129	3,4-dihydroxybenzaldehyde	C7H6O3	HMDB0059965	Organic oxygen compounds	Organooxygen compounds
pos-0.868_267.09595	adenosine	C10H13N5O4	HMDB0000050	Nucleosides, nucleotides, and analogues	Purine nucleosides
pos-0.697_155.06904	l-histidine	C6H9N3O2	HMDB0000177	Organic acids and derivatives	Carboxylic acids and derivatives
pos-0.793_158.06862	4-methylene-l-glutamine	C6H10N2O3
pos-7.721_294.21855	9-oxo-ode	C18H30O3	HMDB0004669	Lipids and lipid-like molecules	Fatty Acyls
pos-3.597_181.03716	2-methyl-3-hydroxy-5-formylpyridine-4-carboxylate	C8H7NO4	HMDB0006954	Organoheterocyclic compounds	Pyridines and derivatives
pos-0.834_126.0313	3-hydroxy-2-methyl-4-pyrone	C6H6O3	HMDB0030776	Organoheterocyclic compounds	Pyrans
pos-0.832_342.11508	1-alpha-d-galactosyl-myo-inositol	C12H22O11	HMDB0005826	Organic oxygen compounds	Organooxygen compounds
pos-0.801_101.04743	1-aminocyclopropane-1-carboxylate	C4H7NO2	HMDB0036458	Organic acids and derivatives	Carboxylic acids and derivatives
pos-6.336_294.21852	13(s)-hotre	C18H30O3
pos-1.309_134.02247	guanine	C5H5N5O	HMDB0000132	Organoheterocyclic compounds	Imidazopyrimidines
pos-1.312_151.04903	guanine	C5H5N5O	HMDB0000132	Organoheterocyclic compounds	Imidazopyrimidines
pos-0.663_130.1215	agmatine	C5H14N4	HMDB0001432	Organic nitrogen compounds	Organonitrogen compounds
pos-0.874_140.04695	l-tyrosine	C9H11NO3	HMDB0000158	Organic acids and derivatives	Carboxylic acids and derivatives
pos-0.897_85.08891	piperidine	C5H11N	HMDB0034301	Organoheterocyclic compounds	Piperidines
pos-7.296_495.33341	1-palmitoylglycerophosphocholine	C24H50NO7P	HMDB0010382	Lipids and lipid-like molecules	Glycerophospholipids
pos-0.647_123.03342	picolinic acid	C6H5NO2	HMDB0002243	Organoheterocyclic compounds	Pyridines and derivatives
pos-0.854_347.06205	adenosine 5'-monophosphate	C10H14N5O7P	HMDB0000045	Nucleosides, nucleotides, and analogues	Purine nucleotides
pos-7.297_495.33092	1-palmitoylglycerophosphocholine	C24H50NO7P	HMDB0010382	Lipids and lipid-like molecules	Glycerophospholipids
pos-0.889_126.03115	3-hydroxy-2-methyl-4-pyrone	C6H6O3	HMDB0030776	Organoheterocyclic compounds	Pyrans
pos-1.258_123.03175	nicotinic acid	C6H5NO2	HMDB0001488	Organoheterocyclic compounds	Pyridines and derivatives
pos-0.862_135.05418	adenine	C5H5N5	HMDB0000034	Organoheterocyclic compounds	Imidazopyrimidines
pos-0.86_145.08475	4-guanidinobutyric acid	C5H11N3O2	HMDB0003464	Organic acids and derivatives	Carboxylic acids and derivatives
pos-0.861_128.05821	4-guanidinobutyric acid	C5H11N3O2	HMDB0003464	Organic acids and derivatives	Carboxylic acids and derivatives
pos-0.834_111.99224	hydroxymethylphosphonate	CH5O4P
pos-1.57_206.05743	sinapinic acid	C11H12O5	HMDB0032616	Phenylpropanoids and polyketides	Cinnamic acids and derivatives
pos-3.054_146.03645	coumarin	C9H6O2	HMDB0001218	Phenylpropanoids and polyketides	Coumarins and derivatives
pos-3.975_122.03639	4-hydroxybenzaldehyde	C7H6O2	HMDB0011718	Organic oxygen compounds	Organooxygen compounds
pos-0.725_188.15192	n6,n6,n6-trimethyl-l-lysine	C9H20N2O2	HMDB0001325	Organic acids and derivatives	Carboxylic acids and derivatives
pos-0.865_122.03728	4-hydroxybenzaldehyde	C7H6O2	HMDB0011718	Organic oxygen compounds	Organooxygen compounds
pos-0.854_149.05065	l-methionine	C5H11NO2S	HMDB0000696	Organic acids and derivatives	Carboxylic acids and derivatives
pos-0.87_151.04903	guanine	C5H5N5O	HMDB0000132	Organoheterocyclic compounds	Imidazopyrimidines
pos-0.868_134.02243	guanine	C5H5N5O	HMDB0000132	Organoheterocyclic compounds	Imidazopyrimidines
pos-1.019_165.07854	l-phenylalanine	C9H11NO2	HMDB0000159	Organic acids and derivatives	Carboxylic acids and derivatives
pos-0.933_111.99225	hydroxymethylphosphonate	CH5O4P
pos-1.309_283.09083	guanosine	C10H13N5O5	HMDB0000133	Nucleosides, nucleotides, and analogues	Purine nucleosides
pos-4.399_194.05745	ferulic acid	C10H10O4	HMDB0000954	Phenylpropanoids and polyketides	Cinnamic acids and derivatives
pos-0.815_258.08419	(1-ribosylimidazole)-4-acetate	C10H14N2O6	HMDB0002331	Nucleosides, nucleotides, and analogues	Imidazole ribonucleosides and ribonucleotides
pos-4.385_224.0679	sinapinic acid	C11H12O5	HMDB0032616	Phenylpropanoids and polyketides	Cinnamic acids and derivatives
pos-1.259_112.02701	uracil	C4H4N2O2	HMDB0000300	Organoheterocyclic compounds	Diazines
pos-3.99_117.05745	indole	C8H7N	HMDB0000738	Organoheterocyclic compounds	Indoles and derivatives
pos-6.329_352.22137	6-ketoprostaglandin f1伪	C20H34O6	HMDB0002886	Lipids and lipid-like molecules	Fatty Acyls
pos-3.185_117.05754	indole	C8H7N	HMDB0000738	Organoheterocyclic compounds	Indoles and derivatives
pos-1.259_122.03649	4-hydroxybenzaldehyde	C7H6O2	HMDB0011718	Organic oxygen compounds	Organooxygen compounds
pos-4.969_97.97657	orthophosphate	H3O4P	HMDB0001429	Homogeneous non-metal compounds	Non-metal oxoanionic compounds
pos-5.975_352.22135	6-ketoprostaglandin f1伪	C20H34O6	HMDB0002886	Lipids and lipid-like molecules	Fatty Acyls
pos-0.869_94.04157	phenol	C6H6O	HMDB0000228	Benzenoids	Phenols
pos-3.36_482.25201	11-beta-hydroxyandrosterone-3-glucuronide	C25H38O9	HMDB0010351	Organoheterocyclic compounds	Indoles and derivatives
pos-0.644_82.00704	nicotinic acid	C6H5NO2	HMDB0001488	Organoheterocyclic compounds	Pyridines and derivatives
pos-2.994_232.12068	melatonin	C13H16N2O2	HMDB0001389	Organoheterocyclic compounds	Indoles and derivatives
pos-0.92_126.03136	3-hydroxy-2-methyl-4-pyrone	C6H6O3	HMDB0030776	Organoheterocyclic compounds	Pyrans
pos-0.69_139.07428	4-amino-5-hydroxymethyl-2-methylpyrimidine	C6H9N3O
pos-3.595_343.08954	diboa-glucoside	C14H17NO9	HMDB0033734	Organic oxygen compounds	Organooxygen compounds
pos-1.49_206.05741	sinapinic acid	C11H12O5	HMDB0032616	Phenylpropanoids and polyketides	Cinnamic acids and derivatives
pos-4.234_164.04699	4-coumaric acid	C9H8O3	HMDB0002035	Phenylpropanoids and polyketides	Cinnamic acids and derivatives
pos-6.561_294.21854	13(s)-hotre	C18H30O3
pos-7.643_294.21859	13(s)-hotre	C18H30O3
pos-0.789_322.13655	2'-deamino-2'-hydroxy-6'-dehydroparomamine	C12H22N2O8
pos-0.793_426.08668	s-glutathionyl-l-cysteine	C13H22N4O8S2
pos-4.969_154.03907	diethyl phosphate	C4H11O4P	HMDB0012209	Organic acids and derivatives	Organic phosphoric acids and derivatives
pos-7.203_294.2186	13(s)-hotre	C18H30O3
pos-1.357_251.10118	2'-deoxyadenosine	C10H13N5O3	HMDB0000101	Nucleosides, nucleotides, and analogues	Purine nucleosides
pos-9.783_183.97753	3-phosphonooxypyruvate	C3H5O7P	HMDB0001024	Organic oxygen compounds	Organooxygen compounds
pos-3.642_194.05746	ferulic acid	C10H10O4	HMDB0000954	Phenylpropanoids and polyketides	Cinnamic acids and derivatives
pos-1.255_347.06206	adenosine 5'-monophosphate	C10H14N5O7P	HMDB0000045	Nucleosides, nucleotides, and analogues	Purine nucleotides
pos-0.834_364.09703	d-(+)-maltose	C12H22O11	HMDB0000163	Organic oxygen compounds	Organooxygen compounds
pos-0.827_150.03119	phenylglyoxylic acid	C8H6O3	HMDB0001587	Benzenoids	Benzene and substituted derivatives
pos-0.796_111.04294	cytosine	C4H5N3O	HMDB0000630	Organoheterocyclic compounds	Diazines
pos-1.255_145.08475	4-guanidinobutanoate	C5H11N3O2	HMDB0003464	Organic acids and derivatives	Carboxylic acids and derivatives
pos-4.088_146.03649	coumarin	C9H6O2	HMDB0001218	Phenylpropanoids and polyketides	Coumarins and derivatives
pos-6.813_294.21855	13(s)-hotre	C18H30O3
pos-0.621_145.15752	spermidine	C7H19N3	HMDB0001257	Organic nitrogen compounds	Organonitrogen compounds
pos-1.736_206.05741	sinapinic acid	C11H12O5	HMDB0032616	Phenylpropanoids and polyketides	Cinnamic acids and derivatives
pos-7.77_294.21856	13(s)-hotre	C18H30O3
pos-3.133_150.03144	phenylglyoxylic acid	C8H6O3	HMDB0001587	Benzenoids	Benzene and substituted derivatives
pos-1.374_187.04759	2-(acetamidomethylene)succinate	C7H9NO5
pos-0.826_122.04756	nicotinamide	C6H6N2O	HMDB0001406	Organoheterocyclic compounds	Pyridines and derivatives
pos-5.405_352.22136	6-ketoprostaglandin f1伪	C20H34O6	HMDB0002886	Lipids and lipid-like molecules	Fatty Acyls
pos-3.178_129.08998	4-guanidinobutanal	C5H11N3O
pos-0.87_283.09085	guanosine	C10H13N5O5	HMDB0000133	Nucleosides, nucleotides, and analogues	Purine nucleosides
pos-0.907_139.98691	acetylphosphate	C2H5O5P	HMDB0001494	Organic acids and derivatives	Organic phosphoric acids and derivatives
pos-3.261_297.08834	5'-s-methyl-5'-thioadenosine	C11H15N5O3S	HMDB0001173	Nucleosides, nucleotides, and analogues	5'-deoxyribonucleosides
pos-0.832_111.04297	cytosine	C4H5N3O	HMDB0000630	Organoheterocyclic compounds	Diazines
pos-1.255_188.11556	n6-acetyl-l-lysine	C8H16N2O3	HMDB0000206	Organic acids and derivatives	Carboxylic acids and derivatives
pos-0.914_172.01312	glycerol 3-phosphate	C3H9O6P	HMDB0000126	Lipids and lipid-like molecules	Glycerophospholipids
pos-0.87_122.03649	4-hydroxybenzaldehyde	C7H6O2	HMDB0011718	Organic oxygen compounds	Organooxygen compounds
pos-0.691_111.01392	4-methyl-5-thiazoleethanol	C6H9NOS	HMDB0032985	Organoheterocyclic compounds	Azoles
pos-0.903_526.14967	d-raffinose	C18H32O16	HMDB0003213	Organic oxygen compounds	Organooxygen compounds
pos-5.9_352.22139	6-ketoprostaglandin f1伪	C20H34O6	HMDB0002886	Lipids and lipid-like molecules	Fatty Acyls
pos-1.992_328.05517	aflatoxin g1	C17H12O7	HMDB0030474	Phenylpropanoids and polyketides	Coumarins and derivatives
pos-0.689_143.04014	4-methyl-5-thiazoleethanol	C6H9NOS	HMDB0032985	Organoheterocyclic compounds	Azoles
pos-0.959_126.00785	2-hydroxyethylphosphonate	C2H7O4P
pos-0.778_276.13122	saccharopine	C11H20N2O6	HMDB0000279	Organic acids and derivatives	Carboxylic acids and derivatives
pos-0.864_250.06161	gamma-glutamylcysteine	C8H14N2O5S	HMDB0001049	Organic acids and derivatives	Carboxylic acids and derivatives
pos-0.81_133.03708	d-aspartate	C4H7NO4	HMDB0006483	Organic acids and derivatives	Carboxylic acids and derivatives
pos-3.548_150.03144	phenylglyoxylic acid	C8H6O3	HMDB0001587	Benzenoids	Benzene and substituted derivatives
pos-4.968_126.00787	2-hydroxyethylphosphonate	C2H7O4P
pos-0.824_165.07857	l-phenylalanine	C9H11NO2	HMDB0000159	Organic acids and derivatives	Carboxylic acids and derivatives
pos-0.892_174.11117	d-arginine	C6H14N4O2	HMDB0003416	Organic acids and derivatives	Carboxylic acids and derivatives
pos-2.009_126.04259	thymine	C5H6N2O2	HMDB0000262	Organoheterocyclic compounds	Diazines
pos-0.86_169.07339	norepinephrine	C8H11NO3	HMDB0000216	Benzenoids	Phenols
pos-3.321_181.03715	2-methyl-3-hydroxy-5-formylpyridine-4-carboxylate	C8H7NO4	HMDB0006954	Organoheterocyclic compounds	Pyridines and derivatives
pos-0.785_215.05517	sn-glycero-3-phosphoethanolamine	C5H14NO6P	HMDB0000114	Lipids and lipid-like molecules	Glycerophospholipids
pos-7.877_290.2602	geranylgeraniol	C20H34O
pos-4.006_178.06257	coniferylaldehyde	C10H10O3	HMDB0141782	Benzenoids	Phenols
pos-0.864_179.0814	7-aminomethyl-7-deazaguanine	C7H9N5O	HMDB0011690	Organoheterocyclic compounds	Pyrrolopyrimidines
pos-0.693_129.08973	4-guanidinobutanal	C5H11N3O
pos-0.851_132.04193	(s)-2-acetolactate	C5H8O4	HMDB0006855	Organic acids and derivatives	Keto acids and derivatives
pos-1.255_250.06163	gamma-glutamylcysteine	C8H14N2O5S	HMDB0001049	Organic acids and derivatives	Carboxylic acids and derivatives
pos-0.834_270.07298	d-lombricine	C6H15N4O6P
pos-0.83_180.04153	2-hydroxy-3-(4-hydroxyphenyl)propenoate	C9H8O4	HMDB0006915	Benzenoids	Benzene and substituted derivatives
pos-2.164_143.04014	4-methyl-5-thiazoleethanol	C6H9NOS	HMDB0032985	Organoheterocyclic compounds	Azoles
pos-6.685_294.21855	13(s)-hotre	C18H30O3
pos-3.616_132.05727	trans-cinnamaldehyde	C9H8O	HMDB0003441	Phenylpropanoids and polyketides	Cinnamaldehydes
pos-0.891_155.06904	l-histidine	C6H9N3O2	HMDB0000177	Organic acids and derivatives	Carboxylic acids and derivatives
pos-0.863_219.07386	o-succinyl-l-homoserine	C8H13NO6
pos-0.755_111.01393	4-methyl-5-thiazoleethanol	C6H9NOS	HMDB0032985	Organoheterocyclic compounds	Azoles
pos-0.87_498.10794	bis-gamma-glutamylcystine	C16H26N4O10S2	HMDB0038458	Organic acids and derivatives	Carboxylic acids and derivatives
pos-0.755_143.04014	4-methyl-5-thiazoleethanol	C6H9NOS	HMDB0032985	Organoheterocyclic compounds	Azoles
pos-5.566_134.10909	p-cymene	C10H14	HMDB0005805	Lipids and lipid-like molecules	Prenol lipids
pos-2.121_168.04185	3,4-dihydroxyphenylacetic acid	C8H8O4	HMDB0001336	Benzenoids	Phenols
pos-3.134_210.05239	5-hydroxyferulate	C10H10O5	HMDB0035484	Phenylpropanoids and polyketides	Cinnamic acids and derivatives
pos-3.501_146.03645	coumarin	C9H6O2	HMDB0001218	Phenylpropanoids and polyketides	Coumarins and derivatives
pos-0.812_131.10538	n-carbamoylputrescine	C5H13N3O	HMDB0033458	Organic acids and derivatives	Carboximidic acids and derivatives
pos-1.246_342.11517	1-alpha-d-galactosyl-myo-inositol	C12H22O11	HMDB0005826	Organic oxygen compounds	Organooxygen compounds
pos-1.263_189.06314	aminodhq	C7H11NO5
pos-2.056_244.08746	biotin	C10H16N2O3S	HMDB0000030	Organoheterocyclic compounds	Biotin and derivatives
pos-3.144_473.16502	10-formyltetrahydrofolate	C20H23N7O7	HMDB0000972	Organoheterocyclic compounds	Dithiolanes
pos-6.925_294.21856	13(s)-hotre	C18H30O3
pos-5.566_150.10404	(-)-isopiperitenone	C10H14O
pos-0.9_187.0476	2-(acetamidomethylene)succinate	C7H9NO5
pos-1.238_526.14969	d-raffinose	C18H32O16	HMDB0003213	Organic oxygen compounds	Organooxygen compounds
pos-0.709_101.04741	1-aminocyclopropane-1-carboxylate	C4H7NO2	HMDB0036458	Organic acids and derivatives	Carboxylic acids and derivatives
pos-1.57_178.06256	coniferylaldehyde	C10H10O3	HMDB0141782	Benzenoids	Phenols
pos-1.544_276.07721	biotin sulfone	C10H16N2O5S	HMDB0004818	Organoheterocyclic compounds	Thienoimidazolidines
pos-0.933_324.03485	3'-ump	C9H13N2O9P	HMDB0060282	Nucleosides, nucleotides, and analogues	Ribonucleoside 3'-phosphates
pos-1.256_131.05782	(s)-4-amino-5-oxopentanoate	C5H9NO3
pos-5.2_352.22144	6-ketoprostaglandin f1伪	C20H34O6	HMDB0002886	Lipids and lipid-like molecules	Fatty Acyls
pos-4.047_187.12039	8-amino-7-oxononanoate	C9H17NO3	HMDB0240687	Lipids and lipid-like molecules	Fatty Acyls
pos-3.506_113.08384	caprolactam	C6H11NO	HMDB0062769	Organoheterocyclic compounds	Lactams
pos-0.836_222.05204	2-succinylbenzoate	C11H10O5
pos-1.241_521.19438	d-raffinose	C18H32O16	HMDB0003213	Organic oxygen compounds	Organooxygen compounds
pos-1.831_179.07904	1-amino-1-deoxy-scyllo-inositol	C6H13NO5
pos-3.988_168.04184	3,4-dihydroxyphenylacetic acid	C8H8O4	HMDB0001336	Benzenoids	Phenols
pos-0.693_115.06299	d-proline	C5H9NO2	HMDB0003411	Organic acids and derivatives	Carboxylic acids and derivatives
pos-1.262_113.0474	(s)-1-pyrroline-5-carboxylate	C5H7NO2	HMDB0001301	Organic acids and derivatives	Carboxylic acids and derivatives
pos-1.849_548.08112	dtdp-6-deoxy-l-mannose	C16H26N2O15P2	HMDB0006354	Nucleosides, nucleotides, and analogues	Pyrimidine nucleotides
pos-3.443_320.14777	octanoylglucuronide	C14H24O8	HMDB0010347	Organic oxygen compounds	Organooxygen compounds
pos-1.258_120.05723	phenylacetaldehyde	C8H8O	HMDB0006236	Benzenoids	Benzene and substituted derivatives
pos-3.735_132.05727	trans-cinnamaldehyde	C9H8O	HMDB0003441	Phenylpropanoids and polyketides	Cinnamaldehydes
pos-1.257_111.04324	cytosine	C4H5N3O	HMDB0000630	Organoheterocyclic compounds	Diazines
pos-3.926_150.03144	phenylglyoxylic acid	C8H6O3	HMDB0001587	Benzenoids	Benzene and substituted derivatives
pos-3.466_225.06328	4-amino-4-deoxychorismate	C10H11NO5
pos-3.26_135.05421	adenine	C5H5N5	HMDB0000034	Organoheterocyclic compounds	Imidazopyrimidines
pos-7.771_371.33887	lithocholic acid	C24H40O3	HMDB0000717	Lipids and lipid-like molecules	Steroids and steroid derivatives
pos-2.029_187.12033	8-amino-7-oxononanoate	C9H17NO3	HMDB0240687	Lipids and lipid-like molecules	Fatty Acyls
pos-1.314_145.15754	spermidine	C7H19N3	HMDB0001257	Organic nitrogen compounds	Organonitrogen compounds
pos-0.878_113.04739	(s)-1-pyrroline-5-carboxylate	C5H7NO2	HMDB0001301	Organic acids and derivatives	Carboxylic acids and derivatives
pos-9.772_163.05903	o-ureido-d-serine	C4H9N3O4
pos-1.375_101.04741	1-aminocyclopropane-1-carboxylate	C4H7NO2	HMDB0036458	Organic acids and derivatives	Carboxylic acids and derivatives
pos-1.262_169.07333	norepinephrine	C8H11NO3	HMDB0000216	Benzenoids	Phenols
pos-3.751_224.06796	sinapinic acid	C11H12O5	HMDB0032616	Phenylpropanoids and polyketides	Cinnamic acids and derivatives
pos-5.2_294.21856	13(s)-hotre	C18H30O3
pos-1.252_179.08154	7-aminomethyl-7-deazaguanine	C7H9N5O	HMDB0011690	Organoheterocyclic compounds	Pyrrolopyrimidines
pos-3.143_482.25176	11-beta-hydroxyandrosterone-3-glucuronide	C25H38O9	HMDB0010351	Organoheterocyclic compounds	Indoles and derivatives
pos-1.529_152.03304	xanthine	C5H4N4O2	HMDB0000292	Organoheterocyclic compounds	Imidazopyrimidines
pos-4.637_242.07973	lumichrome	C12H10N4O2
pos-7.77_393.3208	lithocholic acid	C24H40O3	HMDB0000717	Lipids and lipid-like molecules	Steroids and steroid derivatives
pos-9.783_139.98786	acetylphosphate	C2H5O5P	HMDB0001494	Organic acids and derivatives	Organic phosphoric acids and derivatives
pos-1.252_147.05261	glutamic acid	C5H9NO4	HMDB0000148	Organic acids and derivatives	Carboxylic acids and derivatives
pos-0.841_176.05401	allantoate	C4H8N4O4	HMDB0001209	Organic acids and derivatives	Carboxylic acids and derivatives
pos-3.31_181.07348	l-tyrosine	C9H11NO3	HMDB0000158	Organic acids and derivatives	Carboxylic acids and derivatives
pos-0.869_214.13111	dethiobiotin	C10H18N2O3	HMDB0003581	Lipids and lipid-like molecules	Fatty Acyls
pos-3.241_225.06324	4-amino-4-deoxychorismate	C10H11NO5
pos-0.821_274.1268	n2-succinyl-l-arginine	C10H18N4O5
pos-0.796_131.05777	(s)-4-amino-5-oxopentanoate	C5H9NO3
pos-1.405_463.07316	adenylosuccinic acid	C14H18N5O11P	HMDB0000536	Benzenoids	Benzene and substituted derivatives
pos-7.28_324.22905	corticosterone	C21H30O4	HMDB0001547	Lipids and lipid-like molecules	Steroids and steroid derivatives
pos-0.954_167.98189	3-phosphonopyruvate	C3H5O6P
pos-7.788_286.2287	arachidonic acid	C20H32O2	HMDB0001043	Lipids and lipid-like molecules	Fatty Acyls
pos-0.882_189.06321	aminodhq	C7H11NO5
pos-1.489_178.06257	coniferylaldehyde	C10H10O3	HMDB0141782	Benzenoids	Phenols
pos-3.974_205.07317	5-methoxyindoleacetate	C11H11NO3	HMDB0004096	Organoheterocyclic compounds	Indoles and derivatives
pos-0.678_111.07932	histamine	C5H9N3	HMDB0000870	Organic nitrogen compounds	Organonitrogen compounds
pos-1.836_260.06787	khellin	C14H12O5
pos-4.192_152.11976	(-)-trans-carveol	C10H16O	HMDB0003450	Lipids and lipid-like molecules	Prenol lipids
pos-4.106_214.13122	dethiobiotin	C10H18N2O3	HMDB0003581	Lipids and lipid-like molecules	Fatty Acyls
pos-2.944_150.03144	phenylglyoxylic acid	C8H6O3	HMDB0001587	Benzenoids	Benzene and substituted derivatives
pos-3.347_206.05741	sinapinic acid	C11H12O5	HMDB0032616	Phenylpropanoids and polyketides	Cinnamic acids and derivatives
pos-1.57_180.04176	2-hydroxy-3-(4-hydroxyphenyl)propenoate	C9H8O4	HMDB0006915	Benzenoids	Benzene and substituted derivatives
pos-7.595_371.33881	lithocholic acid	C24H40O3	HMDB0000717	Lipids and lipid-like molecules	Steroids and steroid derivatives
pos-9.724_183.97748	3-phosphonooxypyruvate	C3H5O7P	HMDB0001024	Organic oxygen compounds	Organooxygen compounds
pos-0.805_165.04547	l-methionine sulfoxide	C5H11NO3S	HMDB0002005	Organic acids and derivatives	Carboxylic acids and derivatives
pos-1.254_126.00783	2-hydroxyethylphosphonate	C2H7O4P
pos-0.797_111.04351	cytosine	C4H5N3O	HMDB0000630	Organoheterocyclic compounds	Diazines
pos-8.69_306.2549	8z,11z,14z-eicosatrienoic acid	C20H34O2	HMDB0002925	Lipids and lipid-like molecules	Fatty Acyls
pos-1.975_179.0803	7-aminomethyl-7-deazaguanine	C7H9N5O	HMDB0011690	Organoheterocyclic compounds	Pyrrolopyrimidines
pos-3.782_178.06262	coniferylaldehyde	C10H10O3	HMDB0141782	Benzenoids	Phenols
pos-3.808_178.06256	coniferylaldehyde	C10H10O3	HMDB0141782	Benzenoids	Phenols
pos-1.245_179.08027	glucosamine	C6H13NO5	HMDB0001514	Organic oxygen compounds	Organooxygen compounds
pos-1.501_238.0947	felbamate	C11H14N2O4	HMDB0015084	Benzenoids	Benzene and substituted derivatives
pos-1.326_268.08014	inosine	C10H12N4O5	HMDB0000195	Nucleosides, nucleotides, and analogues	Purine nucleosides
pos-5.565_92.0623	toluene	C7H8	HMDB0034168	Benzenoids	Benzene and substituted derivatives
pos-7.595_393.32081	lithocholic acid	C24H40O3	HMDB0000717	Lipids and lipid-like molecules	Steroids and steroid derivatives
pos-3.193_174.07884	indole-3-acetaldoxime	C10H10N2O
pos-4.164_302.07829	hesperetin	C16H14O6	HMDB0005782	Phenylpropanoids and polyketides	Flavonoids
pos-3.772_386.11965	1-o-sinapoyl-beta-d-glucose	C17H22O10
pos-0.864_216.11035	gamma-glutamyl-gamma-aminobutyraldehyde	C9H16N2O4
pos-3.416_184.07324	3-methoxy-4-hydroxyphenylethyleneglycol	C9H12O4	HMDB0001490	Benzenoids	Phenols
pos-5.302_368.25523	cortol	C21H36O5	HMDB0003180	Lipids and lipid-like molecules	Steroids and steroid derivatives
pos-1.258_216.11039	gamma-glutamyl-gamma-aminobutyraldehyde	C9H16N2O4
pos-1.257_132.04212	(s)-2-acetolactate	C5H8O4	HMDB0006855	Organic acids and derivatives	Keto acids and derivatives
pos-9.789_169.9977	(2r)-2-hydroxy-3-(phosphonooxy)-propanal	C3H7O6P	HMDB0001112	Organic oxygen compounds	Organooxygen compounds
pos-0.867_179.08018	1-amino-1-deoxy-scyllo-inositol	C6H13NO5
pos-5.433_206.0574	sinapinic acid	C11H12O5	HMDB0032616	Phenylpropanoids and polyketides	Cinnamic acids and derivatives
pos-2.078_236.07897	l-formylkynurenine	C11H12N2O4	HMDB0060485	Organic oxygen compounds	Organooxygen compounds
pos-4.193_134.10916	p-cymene	C10H14	HMDB0005805	Lipids and lipid-like molecules	Prenol lipids
pos-3.148_90.03151	(r)-lactate	C3H6O3	HMDB0001311	Organic acids and derivatives	Hydroxy acids and derivatives
pos-0.677_217.14202	gamma-l-glutamylputrescine	C9H19N3O3	HMDB0012230	Organic acids and derivatives	Carboxylic acids and derivatives
pos-2.889_145.1576	spermidine	C7H19N3	HMDB0001257	Organic nitrogen compounds	Organonitrogen compounds
pos-8.841_178.06247	coniferylaldehyde	C10H10O3	HMDB0141782	Benzenoids	Phenols
pos-6.777_368.25515	cortol	C21H36O5	HMDB0003180	Lipids and lipid-like molecules	Steroids and steroid derivatives
pos-9.69_70.05292	beta-aminopropionitrile	C3H6N2	HMDB0004101	Organic nitrogen compounds	Organonitrogen compounds
pos-3.976_289.0789	n-succinyl-2-l-amino-6-oxoheptanedioate	C11H15NO8	HMDB0012266	Organic acids and derivatives	Carboxylic acids and derivatives
pos-3.388_178.06255	coniferylaldehyde	C10H10O3	HMDB0141782	Benzenoids	Phenols
pos-5.374_148.08843	cuminaldehyde	C10H12O	HMDB0002214	Lipids and lipid-like molecules	Prenol lipids
pos-1.26_145.08564	4-guanidinobutanoate	C5H11N3O2	HMDB0003464	Organic acids and derivatives	Carboxylic acids and derivatives
pos-8.059_290.22368	5伪-dihydrotestosterone	C19H30O2	HMDB0002961	Lipids and lipid-like molecules	Steroids and steroid derivatives
pos-8.238_346.21094	corticosterone	C21H30O4	HMDB0001547	Lipids and lipid-like molecules	Steroids and steroid derivatives
pos-0.865_226.09449	porphobilinogen	C10H14N2O4	HMDB0000245	Organic nitrogen compounds	Organonitrogen compounds
pos-4.672_132.05727	cinnamaldehyde	C9H8O	HMDB0003441	Phenylpropanoids and polyketides	Cinnamaldehydes
pos-2.056_92.06235	toluene	C7H8	HMDB0034168	Benzenoids	Benzene and substituted derivatives
pos-3.884_232.12071	melatonin	C13H16N2O2	HMDB0001389	Organoheterocyclic compounds	Indoles and derivatives
pos-3.926_210.05239	5-hydroxyferulate	C10H10O5	HMDB0035484	Phenylpropanoids and polyketides	Cinnamic acids and derivatives
pos-4.013_149.04735	(s)-4-hydroxymandelonitrile	C8H7NO2	HMDB0060318	Benzenoids	Phenols
pos-1.428_189.0632	aminodhq	C7H11NO5
pos-0.951_607.08025	udp-n-acetyl-d-mannosamine	C17H27N3O17P2	HMDB0013112	Nucleosides, nucleotides, and analogues	Pyrimidine nucleotides
pos-1.5_149.04733	(s)-4-hydroxymandelonitrile	C8H7NO2	HMDB0060318	Benzenoids	Phenols
pos-1.245_324.03485	3'-ump	C9H13N2O9P	HMDB0060282	Nucleosides, nucleotides, and analogues	Ribonucleoside 3'-phosphates
pos-0.686_297.08865	5'-methylthioadenosine	C11H15N5O3S	HMDB0001173	Nucleosides, nucleotides, and analogues	5'-deoxyribonucleosides
pos-0.818_323.05105	3'-cmp	C9H14N3O8P	HMDB0240312	Organic oxygen compounds	Organooxygen compounds
pos-1.43_214.13115	dethiobiotin	C10H18N2O3	HMDB0003581	Lipids and lipid-like molecules	Fatty Acyls
pos-5.374_134.1091	p-cymene	C10H14	HMDB0005805	Lipids and lipid-like molecules	Prenol lipids
pos-4.095_132.05727	cinnamaldehyde	C9H8O	HMDB0003441	Phenylpropanoids and polyketides	Cinnamaldehydes
pos-0.777_219.08476	1d-1-guanidino-1-deoxy-3-dehydro-scyllo-inositol	C7H13N3O5
pos-0.839_455.15587	5,10-methenyltetrahydrofolic acid	C20H21N7O6	HMDB0001354	Organoheterocyclic compounds	Pteridines and derivatives
pos-3.603_464.21493	rhizocticin d	C17H33N6O7P
pos-2.486_181.03711	2-methyl-3-hydroxy-5-formylpyridine-4-carboxylate	C8H7NO4	HMDB0006954	Organoheterocyclic compounds	Pyridines and derivatives
pos-1.255_125.05845	5-methylcytosine	C5H7N3O	HMDB0002894	Organoheterocyclic compounds	Diazines
pos-3.546_132.05727	cinnamaldehyde	C9H8O	HMDB0003441	Phenylpropanoids and polyketides	Cinnamaldehydes
pos-5.566_134.0728	chavicol	C9H10O	HMDB0034107	Benzenoids	Phenols
pos-4.191_205.07322	5-methoxyindoleacetate	C11H11NO3	HMDB0004096	Organoheterocyclic compounds	Indoles and derivatives
pos-1.314_238.09464	felbamate	C11H14N2O4	HMDB0015084	Benzenoids	Benzene and substituted derivatives
pos-1.256_383.17983	dihydrozeatin-o-glucoside	C16H25N5O6	HMDB0012214	Lipids and lipid-like molecules	Fatty Acyls
pos-3.214_145.1099	3-dehydroxycarnitine	C7H15NO2	HMDB0001161	Lipids and lipid-like molecules	Fatty Acyls
pos-1.384_299.07613	d-4'-phosphopantothenate	C9H18NO8P	HMDB0001016	Organic acids and derivatives	Carboxylic acids and derivatives
pos-1.255_214.13114	dethiobiotin	C10H18N2O3	HMDB0003581	Lipids and lipid-like molecules	Fatty Acyls
pos-2.944_210.05239	5-hydroxyferulate	C10H10O5	HMDB0035484	Phenylpropanoids and polyketides	Cinnamic acids and derivatives
pos-1.248_270.07301	d-lombricine	C6H15N4O6P
pos-3.179_226.07117	5-acetylamino-6-formylamino-3-methyluracil	C8H10N4O4	HMDB0011105	Organoheterocyclic compounds	Diazines
pos-5.25_368.25515	cortol	C21H36O5	HMDB0003180	Lipids and lipid-like molecules	Steroids and steroid derivatives
pos-4.013_133.05249	2-oxindole	C8H7NO	HMDB0061918	Organoheterocyclic compounds	Indoles and derivatives
pos-5.565_106.07794	ethylbenzene	C8H10	HMDB0059905	Benzenoids	Benzene and substituted derivatives
pos-3.656_173.01431	sulfanilic acid	C6H7NO3S
pos-3.975_94.0416	phenol	C6H6O	HMDB0000228	Benzenoids	Phenols
pos-3.836_146.03644	coumarin	C9H6O2	HMDB0001218	Phenylpropanoids and polyketides	Coumarins and derivatives
pos-5.36_146.03643	coumarin	C9H6O2	HMDB0001218	Phenylpropanoids and polyketides	Coumarins and derivatives
pos-0.879_283.09228	guanosine	C10H13N5O5	HMDB0000133	Nucleosides, nucleotides, and analogues	Purine nucleosides
pos-3.755_104.06227	styrene	C8H8	HMDB0034240	Benzenoids	Benzene and substituted derivatives
pos-6.755_134.0728	chavicol	C9H10O	HMDB0034107	Benzenoids	Phenols
pos-1.266_426.08652	s-glutathionyl-l-cysteine	C13H22N4O8S2
pos-3.252_226.09485	porphobilinogen	C10H14N2O4	HMDB0000245	Organic nitrogen compounds	Organonitrogen compounds
pos-5.455_330.07293	aflatoxin g2	C17H14O7	HMDB0030475	Phenylpropanoids and polyketides	Coumarins and derivatives
pos-3.243_164.04691	2-coumarate	C9H8O3	HMDB0002641	Phenylpropanoids and polyketides	Cinnamic acids and derivatives
pos-6.755_280.1302	8'-hydroxyabscisate	C15H20O5
pos-4.445_187.12036	8-amino-7-oxononanoate	C9H17NO3	HMDB0240687	Lipids and lipid-like molecules	Fatty Acyls
pos-3.858_182.05753	(r)-3-(4-hydroxyphenyl)lactate	C9H10O4
pos-4.219_161.08371	indole-3-ethanol	C10H11NO	HMDB0003447	Organoheterocyclic compounds	Indoles and derivatives
pos-7.489_136.12487	(-)-beta-pinene	C10H16	HMDB0036559	Lipids and lipid-like molecules	Prenol lipids
pos-7.145_456.22559	vindoline	C25H32N2O6
pos-0.872_151.04991	guanine	C5H5N5O	HMDB0000132	Organoheterocyclic compounds	Imidazopyrimidines
pos-6.576_352.2214	6-ketoprostaglandin f1伪	C20H34O6	HMDB0002886	Lipids and lipid-like molecules	Fatty Acyls
pos-3.576_181.07345	l-tyrosine	C9H11NO3	HMDB0000158	Organic acids and derivatives	Carboxylic acids and derivatives
pos-1.379_379.10396	s-lactoylglutathione	C13H21N3O8S	HMDB0001066	Organic acids and derivatives	Carboxylic acids and derivatives
pos-3.36_232.1207	melatonin	C13H16N2O2	HMDB0001389	Organoheterocyclic compounds	Indoles and derivatives
pos-3.777_244.17813	n-(6-aminohexanoyl)-6-aminohexanoate	C12H24N2O3
pos-1.488_180.04174	2-hydroxy-3-(4-hydroxyphenyl)propenoate	C9H8O4	HMDB0006915	Benzenoids	Benzene and substituted derivatives
pos-0.866_238.0944	felbamate	C11H14N2O4	HMDB0015084	Benzenoids	Benzene and substituted derivatives
pos-1.256_132.04273	(s)-2-acetolactate	C5H8O4	HMDB0006855	Organic acids and derivatives	Keto acids and derivatives
pos-0.761_297.08853	5'-methylthioadenosine	C11H15N5O3S	HMDB0001173	Nucleosides, nucleotides, and analogues	5'-deoxyribonucleosides
pos-3.055_215.09383	atrazine	C8H14ClN5	HMDB0041830	Organoheterocyclic compounds	Triazines
pos-8.289_286.22865	11-cis-retinol	C20H30O	HMDB0000305	Lipids and lipid-like molecules	Prenol lipids
pos-4.267_307.08303	glutathione	C10H17N3O6S	HMDB0000125	Organic acids and derivatives	Carboxylic acids and derivatives
pos-3.844_232.12072	melatonin	C13H16N2O2	HMDB0001389	Organoheterocyclic compounds	Indoles and derivatives
pos-1.44_288.06032	orotidine	C10H12N2O8	HMDB0000788	Nucleosides, nucleotides, and analogues	Pyrimidine nucleosides
pos-2.761_205.13089	pantothenol	C9H19NO4	HMDB0004231	Organic oxygen compounds	Organooxygen compounds
pos-7.721_150.10403	(-)-isopiperitenone	C10H14O
pos-3.675_244.17814	n-(6-aminohexanoyl)-6-aminohexanoate	C12H24N2O3
pos-3.676_320.14788	octanoylglucuronide	C14H24O8	HMDB0010347	Organic oxygen compounds	Organooxygen compounds
pos-4.316_144.05718	1-naphthol	C10H8O	HMDB0012138	Benzenoids	Naphthalenes
pos-3.945_182.05754	(r)-3-(4-hydroxyphenyl)lactate	C9H10O4
pos-8.356_184.07299	3-methoxy-4-hydroxyphenylethyleneglycol	C9H12O4	HMDB0001490	Benzenoids	Phenols
pos-3.549_163.06298	3-methyldioxyindole	C9H9NO2	HMDB0004186	Organoheterocyclic compounds	Indoles and derivatives
pos-4.122_250.06173	gamma-glutamylcysteine	C8H14N2O5S	HMDB0001049	Organic acids and derivatives	Carboxylic acids and derivatives
pos-4.438_182.05751	(r)-3-(4-hydroxyphenyl)lactate	C9H10O4
pos-7.897_286.22876	arachidonic acid	C20H32O2	HMDB0001043	Lipids and lipid-like molecules	Fatty Acyls
pos-3.967_276.07783	biotin sulfone	C10H16N2O5S	HMDB0004818	Organoheterocyclic compounds	Thienoimidazolidines
pos-3.743_149.04743	(s)-4-hydroxymandelonitrile	C8H7NO2	HMDB0060318	Benzenoids	Phenols
pos-4.374_289.07892	n-succinyl-2-l-amino-6-oxoheptanedioate	C11H15NO8	HMDB0012266	Organic acids and derivatives	Carboxylic acids and derivatives
pos-3.922_515.29338	taurocholate	C26H45NO7S	HMDB0000036	Lipids and lipid-like molecules	Steroids and steroid derivatives
pos-3.516_182.05762	(r)-3-(4-hydroxyphenyl)lactate	C9H10O4
pos-3.058_132.05725	cinnamaldehyde	C9H8O	HMDB0003441	Phenylpropanoids and polyketides	Cinnamaldehydes
pos-2.955_381.16414	o-beta-d-glucopyranosyl-cis-zeatin	C16H23N5O6	HMDB0012203	Lipids and lipid-like molecules	Fatty Acyls
pos-3.867_225.0632	4-amino-4-deoxychorismate	C10H11NO5
pos-3.351_164.04696	2-coumarate	C9H8O3	HMDB0002641	Phenylpropanoids and polyketides	Cinnamic acids and derivatives
pos-3.595_164.04691	2-coumarate	C9H8O3	HMDB0002641	Phenylpropanoids and polyketides	Cinnamic acids and derivatives
pos-7.131_134.10914	p-cymene	C10H14	HMDB0005805	Lipids and lipid-like molecules	Prenol lipids
pos-6.615_357.15584	deacetylcolchicine	C20H23NO5
pos-4.601_544.15691	premithramycin a1	C27H28O12
pos-3.647_465.10497	myrtillin	C21H21O12	HMDB0037997	Phenylpropanoids and polyketides	Flavonoids
pos-3.457_149.04729	(s)-4-hydroxymandelonitrile	C8H7NO2	HMDB0060318	Benzenoids	Phenols
pos-3.678_390.1532	loganin	C17H26O10
pos-5.566_104.06232	styrene	C8H8	HMDB0034240	Benzenoids	Benzene and substituted derivatives
pos-6.308_104.06236	styrene	C8H8	HMDB0034240	Benzenoids	Benzene and substituted derivatives
pos-3.52_244.17812	n-(6-aminohexanoyl)-6-aminohexanoate	C12H24N2O3
pos-3.76_376.13757	loganate	C16H24O10
pos-3.321_343.08962	diboa-glucoside	C14H17NO9	HMDB0033734	Organic oxygen compounds	Organooxygen compounds
pos-5.373_106.07792	ethylbenzene	C8H10	HMDB0059905	Benzenoids	Benzene and substituted derivatives
pos-4.867_144.05716	1-naphthol	C10H8O	HMDB0012138	Benzenoids	Naphthalenes
pos-3.9_175.06296	3-indoleacetic acid	C10H9NO2	HMDB0000197	Organoheterocyclic compounds	Indoles and derivatives
pos-4.184_194.04488	7-carboxy-7-deazaguanine	C7H6N4O3
pos-4.184_121.05251	benzamide	C7H7NO	HMDB0004461	Benzenoids	Benzene and substituted derivatives
pos-4.058_184.07323	3-methoxy-4-hydroxyphenylethyleneglycol	C9H12O4	HMDB0001490	Benzenoids	Phenols
pos-6.597_368.2552	cortol	C21H36O5	HMDB0003180	Lipids and lipid-like molecules	Steroids and steroid derivatives
pos-5.433_464.2163	rhizocticin d	C17H33N6O7P
pos-7.487_236.17692	capsidiol	C15H24O2	HMDB0002352	Lipids and lipid-like molecules	Prenol lipids
pos-3.875_385.1494	4-(methylnitrosamino)-1-(3-pyridyl)-1-butanol glucuronide	C16H23N3O8	HMDB0060383	Organic acids and derivatives	Carboxylic acids and derivatives
pos-4.834_289.07899	n-succinyl-2-l-amino-6-oxoheptanedioate	C11H15NO8	HMDB0012266	Organic acids and derivatives	Carboxylic acids and derivatives
pos-3.896_276.07787	biotin sulfone	C10H16N2O5S	HMDB0004818	Organoheterocyclic compounds	Thienoimidazolidines
pos-5.447_286.22875	11-cis-retinol	C20H30O	HMDB0000305	Lipids and lipid-like molecules	Prenol lipids
pos-3.618_207.06528	isoniazid pyruvate	C9H9N3O3	HMDB0060664	Organoheterocyclic compounds	Pyridines and derivatives
neg-0.844_342.11559	伪,伪-trehalose	C12H22O11	HMDB0000975	Organic oxygen compounds	Organooxygen compounds
neg-0.954_97.96704	sulfate	H2O4S	HMDB0001448	Homogeneous non-metal compounds	Non-metal oxoanionic compounds
neg-0.825_192.06298	d-(-)-quinic acid	C7H12O6	HMDB0003072	Organic oxygen compounds	Organooxygen compounds
neg-0.825_196.05771	gluconic acid	C6H12O7	HMDB0000625	Organic oxygen compounds	Organooxygen compounds
neg-0.803_260.02913	d-glucose 6-phosphate	C6H13O9P	HMDB0001401	Organic oxygen compounds	Organooxygen compounds
neg-1.089_342.11565	伪,伪-trehalose	C12H22O11	HMDB0000975	Organic oxygen compounds	Organooxygen compounds
neg-0.82_210.07318	sedoheptulose	C7H14O7	HMDB0003219	Organic oxygen compounds	Organooxygen compounds
neg-0.881_146.02105	2-oxoglutaric acid	C5H6O5	HMDB0000208	Organic acids and derivatives	Keto acids and derivatives
neg-0.881_192.02655	citric acid	C6H8O7	HMDB0000094	Organic acids and derivatives	Carboxylic acids and derivatives
neg-0.839_194.0421	2-dehydro-d-gluconate	C6H10O7	HMDB0011732	Organic oxygen compounds	Organooxygen compounds
neg-0.917_97.97657	phosphoric acid	H3O4P	HMDB0001429	Homogeneous non-metal compounds	Non-metal oxoanionic compounds
neg-0.813_97.97655	phosphoric acid	H3O4P	HMDB0001429	Homogeneous non-metal compounds	Non-metal oxoanionic compounds
neg-0.798_147.05272	glutamic acid	C5H9NO4	HMDB0000148	Organic acids and derivatives	Carboxylic acids and derivatives
neg-0.949_566.05426	uridine 5'-diphosphogalactose	C15H24N2O17P2	HMDB0000302	Nucleosides, nucleotides, and analogues	Pyrimidine nucleotides
neg-3.61_343.08973	diboa-glucoside	C14H17NO9	HMDB0033734	Organic oxygen compounds	Organooxygen compounds
neg-0.807_230.01864	d-ribulose 5-phosphate	C5H11O8P	HMDB0000618	Organic oxygen compounds	Organooxygen compounds
neg-1.379_118.02631	methylmalonic acid	C4H6O4	HMDB0000202	Organic acids and derivatives	Carboxylic acids and derivatives
neg-3.527_276.15827	n-(4-guanidinobutyl)-4-hydroxycinnamide	C14H20N4O2	HMDB0033460	Phenylpropanoids and polyketides	Cinnamic acids and derivatives
neg-0.836_180.06289	d-(+)-galactose	C6H12O6	HMDB0000143	Organic oxygen compounds	Organooxygen compounds
neg-1.08_388.12096	d-(+)-maltose	C12H22O11	HMDB0000163	Organic oxygen compounds	Organooxygen compounds
neg-0.835_166.0472	d-arabinonate	C5H10O6	HMDB0000539	Organic oxygen compounds	Organooxygen compounds
neg-0.913_260.02913	d-glucose 6-phosphate	C6H13O9P	HMDB0001401	Organic oxygen compounds	Organooxygen compounds
neg-1.015_260.02936	d-glucose 6-phosphate	C6H13O9P	HMDB0001401	Organic oxygen compounds	Organooxygen compounds
neg-4.239_164.0469	2-hydroxycinnamic acid	C9H8O3	HMDB0002641	Phenylpropanoids and polyketides	Cinnamic acids and derivatives
neg-0.811_139.98687	acetylphosphate	C2H5O5P	HMDB0001494	Organic acids and derivatives	Organic phosphoric acids and derivatives
neg-0.729_155.06912	l-histidine	C6H9N3O2	HMDB0000177	Organic acids and derivatives	Carboxylic acids and derivatives
neg-0.81_97.96704	sulfate	H2O4S	HMDB0001448	Homogeneous non-metal compounds	Non-metal oxoanionic compounds
neg-0.814_169.99749	d-ribulose 5-phosphate	C5H11O8P	HMDB0000618	Organic oxygen compounds	Organooxygen compounds
neg-1.268_244.06904	uridine	C9H12N2O6	HMDB0000296	Nucleosides, nucleotides, and analogues	Pyrimidine nucleosides
neg-0.838_238.06843	3-deoxy-d-manno-octulosonate	C8H14O8
neg-0.834_104.01065	malonic acid	C3H4O4	HMDB0000691	Organic acids and derivatives	Carboxylic acids and derivatives
neg-0.806_254.06312	d-sedoheptulose 7-phosphate	C7H15O10P	HMDB0001068	Organic oxygen compounds	Organooxygen compounds
neg-0.824_185.99234	2-phospho-d-glycerate	C3H7O7P	HMDB0000362	Organic oxygen compounds	Organooxygen compounds
neg-0.804_566.05425	uridine 5'-diphosphogalactose	C15H24N2O17P2	HMDB0000302	Nucleosides, nucleotides, and analogues	Pyrimidine nucleotides
neg-0.95_607.08103	udp-n-acetylglucosamine	C17H27N3O17P2	HMDB0000290	Nucleosides, nucleotides, and analogues	Pyrimidine nucleotides
neg-1.025_116.01064	fumaric acid	C4H4O4	HMDB0000134	Organic acids and derivatives	Carboxylic acids and derivatives
neg-0.92_139.98692	acetylphosphate	C2H5O5P	HMDB0001494	Organic acids and derivatives	Organic phosphoric acids and derivatives
neg-0.882_112.01571	2-furoate	C5H4O3	HMDB0000617	Organoheterocyclic compounds	Furans
neg-0.915_230.01864	d-ribulose 5-phosphate	C5H11O8P	HMDB0000618	Organic oxygen compounds	Organooxygen compounds
neg-0.905_194.04211	2-dehydro-d-gluconate	C6H10O7	HMDB0011732	Organic oxygen compounds	Organooxygen compounds
neg-1.269_129.04222	4-oxoproline	C5H7NO3
neg-3.446_374.12097	secologanate	C16H22O10
neg-0.923_111.99219	hydroxymethylphosphonate	CH5O4P
neg-0.786_180.06291	1d-chiro-inositol	C6H12O6	HMDB0240209	Organic oxygen compounds	Organooxygen compounds
neg-0.884_116.01063	fumaric acid	C4H4O4	HMDB0000134	Organic acids and derivatives	Carboxylic acids and derivatives
neg-2.068_165.07849	l-phenylalanine	C9H11NO2	HMDB0000159	Organic acids and derivatives	Carboxylic acids and derivatives
neg-0.95_536.04366	udp-apiose	C14H22N2O16P2	HMDB0012301	Nucleosides, nucleotides, and analogues	Pyrimidine nucleotides
neg-1.265_130.02628	citraconic acid	C5H6O4	HMDB0000634	Lipids and lipid-like molecules	Fatty Acyls
neg-4.239_120.05717	phenylacetaldehyde	C8H8O	HMDB0006236	Benzenoids	Benzene and substituted derivatives
neg-0.937_339.99542	d-fructose 1,6-bisphosphate	C6H14O12P2	HMDB0001058	Organic oxygen compounds	Organooxygen compounds
neg-4.142_210.05236	5-hydroxyferulate	C10H10O5	HMDB0035484	Phenylpropanoids and polyketides	Cinnamic acids and derivatives
neg-0.781_105.04231	d-serine	C3H7NO3	HMDB0003406	Organic acids and derivatives	Carboxylic acids and derivatives
neg-1.172_116.0106	fumaric acid	C4H4O4	HMDB0000134	Organic acids and derivatives	Carboxylic acids and derivatives
neg-1.32_116.01063	fumaric acid	C4H4O4	HMDB0000134	Organic acids and derivatives	Carboxylic acids and derivatives
neg-1.031_72.02084	acrylic acid	C3H4O2	HMDB0031647	Organic acids and derivatives	Carboxylic acids and derivatives
neg-1.318_283.09118	guanosine	C10H13N5O5	HMDB0000133	Nucleosides, nucleotides, and analogues	Purine nucleosides
neg-3.983_181.04961	phosphinothricin	C5H12NO4P
neg-0.794_129.04231	1-pyrroline-4-hydroxy-2-carboxylate	C5H7NO3	HMDB0002234	Organoheterocyclic compounds	Pyrrolines
neg-0.924_185.99239	2-phospho-d-glycerate	C3H7O7P	HMDB0000362	Organic oxygen compounds	Organooxygen compounds
neg-0.985_146.02111	2-oxoglutaric acid	C5H6O5	HMDB0000208	Organic acids and derivatives	Keto acids and derivatives
neg-1.032_118.02633	methylmalonic acid	C4H6O4	HMDB0000202	Organic acids and derivatives	Carboxylic acids and derivatives
neg-1.305_267.09637	adenosine	C10H13N5O4	HMDB0000050	Nucleosides, nucleotides, and analogues	Purine nucleosides
neg-0.911_244.03432	d-sedoheptulose 7-phosphate	C7H15O10P	HMDB0001068	Organic oxygen compounds	Organooxygen compounds
neg-0.832_132.04183	(s)-2-acetolactate	C5H8O4	HMDB0006855	Organic acids and derivatives	Keto acids and derivatives
neg-0.941_605.07721	gdp-alpha-d-mannose	C16H25N5O16P2	HMDB0001163	Nucleosides, nucleotides, and analogues	Purine nucleotides
neg-3.6_176.068	2-isopropylmalic acid	C7H12O5	HMDB0000402	Lipids and lipid-like molecules	Fatty Acyls
neg-0.824_88.01568	pyruvic acid	C3H4O3	HMDB0000243	Organic acids and derivatives	Keto acids and derivatives
neg-1.265_204.02646	oxaloglutarate	C7H8O7
neg-3.983_166.0261	terephthalic acid	C8H6O4	HMDB0002428	Benzenoids	Benzene and substituted derivatives
neg-0.907_290.03979	d-sedoheptulose 7-phosphate	C7H15O10P	HMDB0001068	Organic oxygen compounds	Organooxygen compounds
neg-0.916_169.99745	d-ribulose 5-phosphate	C5H11O8P	HMDB0000618	Organic oxygen compounds	Organooxygen compounds
neg-1.265_612.15146	oxidized glutathione	C20H32N6O12S2	HMDB0003337	Organic acids and derivatives	Carboxylic acids and derivatives
neg-0.877_306.07573	oxidized glutathione	C20H32N6O12S2	HMDB0003337	Organic acids and derivatives	Carboxylic acids and derivatives
neg-0.877_612.15142	oxidized glutathione	C20H32N6O12S2	HMDB0003337	Organic acids and derivatives	Carboxylic acids and derivatives
neg-0.789_215.0554	sn-glycero-3-phosphoethanolamine	C5H14NO6P	HMDB0000114	Lipids and lipid-like molecules	Glycerophospholipids
neg-3.589_374.12086	secologanate	C16H22O10
neg-0.802_426.08749	s-glutathionyl-l-cysteine	C13H22N4O8S2
neg-1.264_102.03137	succinic semialdehyde	C4H6O3	HMDB0001259	Lipids and lipid-like molecules	Fatty Acyls
neg-3.763_166.0261	phthalic acid	C8H6O4	HMDB0002107	Benzenoids	Benzene and substituted derivatives
neg-0.886_244.069	uridine	C9H12N2O6	HMDB0000296	Nucleosides, nucleotides, and analogues	Pyrimidine nucleosides
neg-0.879_204.02652	oxaloglutarate	C7H8O7
neg-8.611_272.23478	16-hydroxyhexadecanoic acid	C16H32O3	HMDB0006294	Lipids and lipid-like molecules	Fatty Acyls
neg-0.804_607.08105	udp-n-acetyl-d-mannosamine	C17H27N3O17P2	HMDB0013112	Nucleosides, nucleotides, and analogues	Pyrimidine nucleotides
neg-4.146_386.12103	1-o-sinapoyl-beta-d-glucose	C17H22O10
neg-4.392_224.06801	sinapinic acid	C11H12O5	HMDB0032616	Phenylpropanoids and polyketides	Cinnamic acids and derivatives
neg-1.296_135.05418	adenine	C5H5N5	HMDB0000034	Organoheterocyclic compounds	Imidazopyrimidines
neg-0.874_167.98183	3-phosphonopyruvate	C3H5O6P
neg-3.153_374.12086	secologanate	C16H22O10
neg-0.95_167.98186	3-phosphonopyruvate	C3H5O6P
neg-0.786_132.0531	3-ureidopropionic acid	C4H8N2O3	HMDB0000026	Organic acids and derivatives	Organic carbonic acids and derivatives
neg-0.826_72.02084	methylglyoxal	C3H4O2	HMDB0001167	Organic oxygen compounds	Organooxygen compounds
neg-0.884_120.04193	succinic semialdehyde	C4H6O3	HMDB0001259	Lipids and lipid-like molecules	Fatty Acyls
neg-4.405_194.05742	ferulic acid	C10H10O4	HMDB0000954	Phenylpropanoids and polyketides	Cinnamic acids and derivatives
neg-1.266_174.01594	cis-aconitic acid	C6H6O6	HMDB0000072	Organic acids and derivatives	Carboxylic acids and derivatives
neg-1.266_252.08407	2'-deoxyinosine	C10H12N4O4	HMDB0000071	Nucleosides, nucleotides, and analogues	Purine nucleosides
neg-0.861_290.03982	d-sedoheptulose 7-phosphate	C7H15O10P	HMDB0001068	Organic oxygen compounds	Organooxygen compounds
neg-0.963_126.00776	2-hydroxyethylphosphonate	C2H7O4P
neg-3.285_120.05718	phenylacetaldehyde	C8H8O	HMDB0006236	Benzenoids	Benzene and substituted derivatives
neg-0.878_352.06365	4-(4-deoxy-alpha-d-gluc-4-enuronosyl)-d-galacturonate	C12H16O12
neg-1.195_76.0158	glycolic acid	C2H4O3	HMDB0000115	Organic acids and derivatives	Hydroxy acids and derivatives
neg-0.767_147.07207	5-methylthiopentanaldoxime	C6H13NOS
neg-1.379_74.03656	(r)-lactaldehyde	C3H6O2	HMDB0006458	Organic oxygen compounds	Organooxygen compounds
neg-4.512_122.0365	benzoic acid	C7H6O2	HMDB0001870	Benzenoids	Benzene and substituted derivatives
neg-0.886_129.04223	4-oxoproline	C5H7NO3
neg-3.26_311.10015	dhurrin	C14H17NO7	HMDB0060471	Organic oxygen compounds	Organooxygen compounds
neg-1.404_130.02625	citraconic acid	C5H6O4	HMDB0000634	Lipids and lipid-like molecules	Fatty Acyls
neg-6.436_294.18284	[6]-gingerol	C17H26O4	HMDB0005783	Benzenoids	Phenols
neg-1.33_268.08042	inosine	C10H12N4O5	HMDB0000195	Nucleosides, nucleotides, and analogues	Purine nucleosides
neg-0.793_276.1316	saccharopine	C11H20N2O6	HMDB0000279	Organic acids and derivatives	Carboxylic acids and derivatives
neg-3.983_138.0313	2,5-dihydroxybenzaldehyde	C7H6O3	HMDB0004062	Organic oxygen compounds	Organooxygen compounds
neg-1.523_182.05747	(r)-3-(4-hydroxyphenyl)lactate	C9H10O4
neg-1.269_88.01569	pyruvic acid	C3H4O3	HMDB0000243	Organic acids and derivatives	Keto acids and derivatives
neg-2.019_242.08994	thymidine	C10H14N2O5	HMDB0000273	Nucleosides, nucleotides, and analogues	Pyrimidine nucleosides
neg-0.876_162.01597	4-hydroxy-2-oxoglutarate	C5H6O6	HMDB0002070	Organic acids and derivatives	Keto acids and derivatives
neg-0.769_148.07455	mevalonic acid	C6H12O4	HMDB0000227	Lipids and lipid-like molecules	Fatty Acyls
neg-0.796_103.06299	gamma-aminobutyric acid	C4H9NO2	HMDB0000112	Organic acids and derivatives	Carboxylic acids and derivatives
neg-0.793_322.13714	2'-deamino-2'-hydroxy-6'-dehydroparomamine	C12H22N2O8
neg-0.879_498.10855	bis-gamma-glutamylcystine	C16H26N4O10S2	HMDB0038458	Organic acids and derivatives	Carboxylic acids and derivatives
neg-0.805_536.04366	udp-apiose	C14H22N2O16P2	HMDB0012301	Nucleosides, nucleotides, and analogues	Pyrimidine nucleotides
neg-0.853_125.99831	2-hydroxyethanesulfonate	C2H6O4S	HMDB0003903	Organic acids and derivatives	Organic sulfonic acids and derivatives
neg-0.816_131.02239	2-oxosuccinamate	C4H5NO4	HMDB0060350	Organic acids and derivatives	Keto acids and derivatives
neg-0.952_550.05938	udp-l-rhamnose	C15H24N2O16P2	HMDB0012305	Nucleosides, nucleotides, and analogues	Pyrimidine nucleotides
neg-1.525_164.04694	2-coumarate	C9H8O3	HMDB0002641	Phenylpropanoids and polyketides	Cinnamic acids and derivatives
neg-1.388_101.04743	1-aminocyclopropane-1-carboxylate	C4H7NO2	HMDB0036458	Organic acids and derivatives	Carboxylic acids and derivatives
neg-3.887_166.02613	phthalic acid	C8H6O4	HMDB0002107	Benzenoids	Benzene and substituted derivatives
neg-1.896_332.07402	1-o-galloyl-beta-d-glucose	C13H16O10	HMDB0038728	Phenylpropanoids and polyketides	Tannins
neg-4.197_207.08908	n-acetyl-l-phenylalanine	C11H13NO3	HMDB0000512	Organic acids and derivatives	Carboxylic acids and derivatives
neg-3.161_473.1654	10-formyltetrahydrofolate	C20H23N7O7	HMDB0000972	Organoheterocyclic compounds	Dithiolanes
neg-0.927_125.99829	2-hydroxyethanesulfonate	C2H6O4S	HMDB0003903	Organic acids and derivatives	Organic sulfonic acids and derivatives
neg-1.405_86.03656	diacetyl	C4H6O2	HMDB0003407	Organic oxygen compounds	Organooxygen compounds
neg-3.815_180.04183	caffeic acid	C9H8O4	HMDB0001964	Phenylpropanoids and polyketides	Cinnamic acids and derivatives
neg-7.046_280.23962	linoleic acid	C18H32O2	HMDB0000673	Lipids and lipid-like molecules	Fatty Acyls
neg-3.959_386.12087	1-o-sinapoyl-beta-d-glucose	C17H22O10
neg-5.434_250.06199	gamma-glutamylcysteine	C8H14N2O5S	HMDB0001049	Organic acids and derivatives	Carboxylic acids and derivatives
neg-3.26_164.0469	2-hydroxycinnamic acid	C9H8O3	HMDB0002641	Phenylpropanoids and polyketides	Cinnamic acids and derivatives
neg-1.322_72.02091	acrylic acid	C3H4O2	HMDB0031647	Organic acids and derivatives	Carboxylic acids and derivatives
neg-4.053_187.12041	8-amino-7-oxononanoate	C9H17NO3	HMDB0240687	Lipids and lipid-like molecules	Fatty Acyls
neg-3.736_278.12964	pantetheine	C11H22N2O4S	HMDB0003426	Organic acids and derivatives	Carboxylic acids and derivatives
neg-1.271_181.07346	l-tyrosine	C9H11NO3	HMDB0000158	Organic acids and derivatives	Carboxylic acids and derivatives
neg-1.249_174.0523	(2s)-2-isopropyl-3-oxosuccinate	C7H10O5	HMDB0012149	Organic acids and derivatives	Keto acids and derivatives
neg-0.806_454.0721	1-(5'-phosphoribosyl)-5-amino-4-(n-succinocarboxamide)-imidazole	C13H19N4O12P	HMDB0000797	Nucleosides, nucleotides, and analogues	Imidazole ribonucleosides and ribonucleotides
neg-4.146_132.07832	6-hydroxycaproic acid	C6H12O3	HMDB0012843	Organic acids and derivatives	Hydroxy acids and derivatives
neg-1.417_131.09426	l-isoleucine	C6H13NO2	HMDB0000172	Organic acids and derivatives	Carboxylic acids and derivatives
neg-3.796_150.01871	l-(+)-tartaric acid	C4H6O6	HMDB0000956	Organic oxygen compounds	Organooxygen compounds
neg-4.202_312.12066	nivalenol	C15H20O7	HMDB0004304	Lipids and lipid-like molecules	Prenol lipids
neg-1.406_463.07371	adenylosuccinic acid	C14H18N5O11P	HMDB0000536	Benzenoids	Benzene and substituted derivatives
neg-1.394_299.07651	d-4'-phosphopantothenate	C9H18NO8P	HMDB0001016	Organic acids and derivatives	Carboxylic acids and derivatives
neg-3.756_386.12104	1-o-sinapoyl-beta-d-glucose	C17H22O10
neg-0.969_580.03341	udp-d-galacturonate	C15H22N2O18P2	HMDB0012302	Nucleosides, nucleotides, and analogues	Pyrimidine nucleotides
neg-1.352_324.0242	5-o-(1-carboxyvinyl)-3-phosphoshikimate	C10H13O10P
neg-1.557_276.07763	biotin sulfone	C10H16N2O5S	HMDB0004818	Organoheterocyclic compounds	Thienoimidazolidines
neg-1.022_164.04686	2-coumarate	C9H8O3	HMDB0002641	Phenylpropanoids and polyketides	Cinnamic acids and derivatives
neg-0.88_126.00778	2-hydroxyethylphosphonate	C2H7O4P
neg-1.539_268.08041	inosine	C10H12N4O5	HMDB0000195	Nucleosides, nucleotides, and analogues	Purine nucleosides
neg-0.802_258.01383	2-dehydro-3-deoxy-6-phospho-d-gluconate	C6H11O9P	HMDB0001376	Organic acids and derivatives	Keto acids and derivatives
neg-0.877_250.06189	gamma-glutamylcysteine	C8H14N2O5S	HMDB0001049	Organic acids and derivatives	Carboxylic acids and derivatives
neg-1.729_160.03668	2-formylglutarate	C6H8O5
neg-2.075_181.07346	l-tyrosine	C9H11NO3	HMDB0000158	Organic acids and derivatives	Carboxylic acids and derivatives
neg-1.522_92.06234	toluene	C7H8	HMDB0034168	Benzenoids	Benzene and substituted derivatives
neg-0.885_174.05235	(2s)-2-isopropyl-3-oxosuccinate	C7H10O5	HMDB0012149	Organic acids and derivatives	Keto acids and derivatives
neg-3.652_194.05742	ferulic acid	C10H10O4	HMDB0000954	Phenylpropanoids and polyketides	Cinnamic acids and derivatives
neg-1.027_74.03657	(r)-lactaldehyde	C3H6O2	HMDB0006458	Organic oxygen compounds	Organooxygen compounds
neg-1.267_122.00346	3-mercaptolactate	C3H6O3S	HMDB0002127	Organic oxygen compounds	Organooxygen compounds
neg-0.932_388.00714	dudp	C9H14N2O11P2	HMDB0001000	Nucleosides, nucleotides, and analogues	Pyrimidine nucleotides
neg-1.387_187.04757	2-(acetamidomethylene)succinate	C7H9NO5
neg-0.78_219.08497	1d-1-guanidino-1-deoxy-3-dehydro-scyllo-inositol	C7H13N3O5
neg-4.095_132.07832	6-hydroxycaproic acid	C6H12O3	HMDB0012843	Organic acids and derivatives	Hydroxy acids and derivatives
neg-3.047_154.02624	gentisic acid	C7H6O4	HMDB0000152	Benzenoids	Benzene and substituted derivatives
neg-1.17_72.02095	acrylic acid	C3H4O2	HMDB0031647	Organic acids and derivatives	Carboxylic acids and derivatives
neg-3.527_120.05717	phenylacetaldehyde	C8H8O	HMDB0006236	Benzenoids	Benzene and substituted derivatives
neg-1.382_219.07377	o-succinyl-l-homoserine	C8H13NO6
neg-3.77_160.07312	pimelic acid	C7H12O4	HMDB0000857	Lipids and lipid-like molecules	Fatty Acyls
neg-1.682_374.12081	secologanate	C16H22O10
neg-1.522_635.08704	gdp-d-glycero-alpha-d-manno-heptose	C17H27N5O17P2
neg-5.479_302.07859	hesperetin	C16H14O6	HMDB0005782	Phenylpropanoids and polyketides	Flavonoids
neg-0.886_156.0054	2,5-furandicarboxylic acid	C6H4O5	HMDB0004812	Organoheterocyclic compounds	Furans
neg-1.376_274.0087	1-phospho-alpha-d-galacturonate	C6H11O10P
neg-4.663_148.05203	trans-cinnamic acid	C9H8O2	HMDB0000930	Phenylpropanoids and polyketides	Cinnamic acids and derivatives
neg-3.207_163.06296	3-methyldioxyindole	C9H9NO2	HMDB0004186	Organoheterocyclic compounds	Indoles and derivatives
neg-1.303_231.07381	n-acetyl-l-2-amino-6-oxopimelate	C9H13NO6
neg-3.286_360.14048	7-deoxyloganate	C16H24O9
neg-1.265_250.06189	gamma-glutamylcysteine	C8H14N2O5S	HMDB0001049	Organic acids and derivatives	Carboxylic acids and derivatives
neg-3.214_180.04183	caffeic acid	C9H8O4	HMDB0001964	Phenylpropanoids and polyketides	Cinnamic acids and derivatives
neg-5.424_464.21712	rhizocticin d	C17H33N6O7P
neg-5.486_332.25587	phloionolic acid	C18H36O5	HMDB0034295	Lipids and lipid-like molecules	Fatty Acyls
neg-7.277_256.23979	palmitic acid	C16H32O2	HMDB0000220	Lipids and lipid-like molecules	Fatty Acyls
neg-3.368_785.15677	flavin adenine dinucleotide	C27H33N9O15P2	HMDB0001248	Nucleosides, nucleotides, and analogues	Flavin nucleotides
neg-1.267_152.03298	xanthine	C5H4N4O2	HMDB0000292	Organoheterocyclic compounds	Imidazopyrimidines
neg-2.374_168.04176	3,4-dihydroxyphenylacetic acid	C8H8O4	HMDB0001336	Benzenoids	Phenols
neg-0.794_115.02661	maleamate	C4H5NO3
neg-3.376_129.04226	4-oxoproline	C5H7NO3
neg-0.795_259.04521	d-glucosamine 6-phosphate	C6H14NO8P	HMDB0001254	Organic oxygen compounds	Organooxygen compounds
neg-3.627_180.06288	1d-chiro-inositol	C6H12O6	HMDB0240209	Organic oxygen compounds	Organooxygen compounds
neg-0.919_454.07178	1-(5'-phosphoribosyl)-5-amino-4-(n-succinocarboxamide)-imidazole	C13H19N4O12P	HMDB0000797	Nucleosides, nucleotides, and analogues	Imidazole ribonucleosides and ribonucleotides
neg-1.362_338.05131	1-(5-phosphoribosyl)imidazole-4-acetate	C10H15N2O9P	HMDB0006032	Organic oxygen compounds	Organooxygen compounds
neg-3.578_132.07829	6-hydroxycaproic acid	C6H12O3	HMDB0012843	Organic acids and derivatives	Hydroxy acids and derivatives
neg-3.647_150.03128	phenylglyoxylic acid	C8H6O3	HMDB0001587	Benzenoids	Benzene and substituted derivatives
neg-1.238_352.06372	4-(4-deoxy-alpha-d-gluc-4-enuronosyl)-d-galacturonate	C12H16O12
neg-4.154_150.01874	l-(+)-tartaric acid	C4H6O6	HMDB0000956	Organic oxygen compounds	Organooxygen compounds
neg-1.023_92.06236	toluene	C7H8	HMDB0034168	Benzenoids	Benzene and substituted derivatives
neg-4.651_132.07832	6-hydroxycaproic acid	C6H12O3	HMDB0012843	Organic acids and derivatives	Hydroxy acids and derivatives
neg-1.418_267.09636	deoxyguanosine	C10H13N5O4	HMDB0000085	Nucleosides, nucleotides, and analogues	Purine nucleosides
neg-0.806_274.00833	1-phospho-alpha-d-galacturonate	C6H11O10P
neg-3.388_482.25246	11-beta-hydroxyandrosterone-3-glucuronide	C25H38O9	HMDB0010351	Organoheterocyclic compounds	Indoles and derivatives
neg-3.424_194.05742	ferulic acid	C10H10O4	HMDB0000954	Phenylpropanoids and polyketides	Cinnamic acids and derivatives
neg-2.988_154.02624	gentisic acid	C7H6O4	HMDB0000152	Benzenoids	Benzene and substituted derivatives
neg-1.264_541.06049	cyclic adp-ribose	C15H21N5O13P2
neg-1.411_89.04746	beta-alanine	C3H7NO2	HMDB0000056	Organic acids and derivatives	Carboxylic acids and derivatives
neg-1.227_605.07677	gdp-alpha-d-mannose	C16H25N5O16P2	HMDB0001163	Nucleosides, nucleotides, and analogues	Purine nucleotides
neg-5.369_178.0625	coniferylaldehyde	C10H10O3	HMDB0141782	Benzenoids	Phenols
neg-3.083_120.05717	phenylacetaldehyde	C8H8O	HMDB0006236	Benzenoids	Benzene and substituted derivatives
neg-4.017_430.0637	cmp-2-aminoethylphosphonate	C11H20N4O10P2	HMDB0060067	Organic oxygen compounds	Organooxygen compounds
neg-1.438_104.04712	(r)-3-hydroxybutanoate	C4H8O3	HMDB0000011	Organic acids and derivatives	Hydroxy acids and derivatives
neg-1.398_158.06866	4-methylene-l-glutamine	C6H10N2O3
neg-3.752_181.04962	phosphinothricin	C5H12NO4P
neg-0.882_181.07348	l-tyrosine	C9H11NO3	HMDB0000158	Organic acids and derivatives	Carboxylic acids and derivatives
neg-0.897_167.0266	6-thioguanine	C5H5N5S	HMDB0014496	Organoheterocyclic compounds	Imidazopyrimidines
neg-1.266_548.08022	dtdp-6-deoxy-l-mannose	C16H26N2O15P2	HMDB0006354	Nucleosides, nucleotides, and analogues	Pyrimidine nucleotides
neg-5.435_129.04225	4-oxoproline	C5H7NO3
neg-4.716_150.01875	l-(+)-tartaric acid	C4H6O6	HMDB0000956	Organic oxygen compounds	Organooxygen compounds
neg-3.747_129.04228	1-pyrroline-4-hydroxy-2-carboxylate	C5H7NO3	HMDB0002234	Organoheterocyclic compounds	Pyrrolines
neg-1.318_151.04898	guanine	C5H5N5O	HMDB0000132	Organoheterocyclic compounds	Imidazopyrimidines
neg-4.185_190.08374	(r)-3-((r)-3-hydroxybutanoyloxy)butanoate	C8H14O5
neg-0.724_111.07945	histamine	C5H9N3	HMDB0000870	Organic nitrogen compounds	Organonitrogen compounds
neg-2.996_190.08373	(r)-3-((r)-3-hydroxybutanoyloxy)butanoate	C8H14O5
neg-3.02_300.08415	4-(beta-d-glucosyloxy)benzoate	C13H16O8
neg-5.098_250.06199	gamma-glutamylcysteine	C8H14N2O5S	HMDB0001049	Organic acids and derivatives	Carboxylic acids and derivatives
neg-3.782_149.08371	cathinone	C9H11NO
neg-1.267_338.05136	1-(5-phosphoribosyl)imidazole-4-acetate	C10H15N2O9P	HMDB0006032	Organic oxygen compounds	Organooxygen compounds
neg-0.888_219.07382	o-succinyl-l-homoserine	C8H13NO6
neg-5.758_332.25578	phloionolic acid	C18H36O5	HMDB0034295	Lipids and lipid-like molecules	Fatty Acyls
neg-1.245_568.16786	sn38 glucuronide	C28H28N2O11	HMDB0060511	Alkaloids and derivatives	Camptothecins
neg-6.087_532.30646	5beta-cyprinolsulfate	C27H48O8S	HMDB0006888	Lipids and lipid-like molecules	Steroids and steroid derivatives
neg-1.27_160.03674	2-formylglutarate	C6H8O5
neg-3.564_278.12965	pantetheine	C11H22N2O4S	HMDB0003426	Organic acids and derivatives	Carboxylic acids and derivatives
neg-3.285_135.05417	adenine	C5H5N5	HMDB0000034	Organoheterocyclic compounds	Imidazopyrimidines
neg-4.15_372.14165	syringin	C17H24O9
neg-0.893_231.07382	n-acetyl-l-2-amino-6-oxopimelate	C9H13NO6
neg-1.295_258.08479	(1-ribosylimidazole)-4-acetate	C10H14N2O6	HMDB0002331	Nucleosides, nucleotides, and analogues	Imidazole ribonucleosides and ribonucleotides
neg-3.609_109.05249	4-aminophenol	C6H7NO	HMDB0001169	Benzenoids	Benzene and substituted derivatives
neg-3.946_131.09427	l-isoleucine	C6H13NO2	HMDB0000172	Organic acids and derivatives	Carboxylic acids and derivatives
neg-1.266_743.07539	nicotinamide adenine dinucleotide phosphate	C21H28N7O17P3	HMDB0000217	Nucleosides, nucleotides, and analogues	(5'->5')-dinucleotides
neg-3.531_129.04228	4-oxoproline	C5H7NO3
neg-4.445_181.04961	phosphinothricin	C5H12NO4P
neg-5.211_464.21708	rhizocticin d	C17H33N6O7P
neg-4.399_386.12116	1-o-sinapoyl-beta-d-glucose	C17H22O10
neg-4.391_209.04462	n-acetyldemethylphosphinothricin	C6H12NO5P
neg-4.324_250.06206	gamma-glutamylcysteine	C8H14N2O5S	HMDB0001049	Organic acids and derivatives	Carboxylic acids and derivatives
neg-4.513_116.01065	fumaric acid	C4H4O4	HMDB0000134	Organic acids and derivatives	Carboxylic acids and derivatives
neg-3.573_712.27571	124-1	C37H44O14
neg-3.88_385.14985	4-(methylnitrosamino)-1-(3-pyridyl)-1-butanol glucuronide	C16H23N3O8	HMDB0060383	Organic acids and derivatives	Carboxylic acids and derivatives
neg-4.239_180.04178	2-hydroxy-3-(4-hydroxyphenyl)propenoate	C9H8O4	HMDB0006915	Benzenoids	Benzene and substituted derivatives
neg-4.435_372.14137	syringin	C17H24O9

## Sheet: S7
Table S7. The number of Differentially accumulated metabolites in young embryos infected with Agrobacterium tumefaciens
Comparison	All DEMs (no.)	Upaccumulated metabolites(no.)	Downaccumulated metabolites(no.)
T1 vs. CK1	248	154	94
T2 vs. CK2	304	175	129

## Sheet: S8
Table S8. Differentially accumulated metabolites between CK1 and T1
ID	CK1_1	CK1_2	CK1_3	CK1_4	CK1_5	CK1_6	T1_1	T1_2	T1_3	T1_4	T1_5	T1_6	regulated
neg-0.824_88.01568	4.31953e+07	5.68362e+07	6.48631e+07	5.63029e+07	5.8364e+07	4.53204e+07	2.53844e+07	2.09201e+07	2.22073e+07	2.26267e+07	2.32434e+07	2.35627e+07	down
neg-0.798_147.05272	4.23824e+08	2.76722e+08	4.73232e+08	2.48448e+08	1.90928e+08	2.4881e+08	5.25742e+08	1.00439e+08	4.69252e+07	3.8009e+07	2.15291e+07	3.45962e+07	down
neg-0.985_146.02111	2.69286e+07	2.74323e+07	7.41667e+07	2.25043e+07	2.48025e+07	1.99933e+07	4.27848e+07	8.08883e+06	2.67755e+06	2.51322e+06	1.9327e+06	2.52593e+06	down
neg-1.296_135.05418	3.98824e+07	4.17254e+07	2.93546e+07	4.69081e+07	3.1146e+07	3.93815e+07	11544381	1.70066e+07	1.38811e+07	2.43621e+07	2.01495e+07	1.96047e+07	down
neg-1.305_267.09637	6.73125e+07	7.46657e+07	5.23212e+07	8.89485e+07	5.55927e+07	6.89358e+07	1.93765e+07	3.07335e+07	2.66879e+07	4.39296e+07	3.82292e+07	3.6005e+07	down
pos-0.868_267.09595	5.44565e+08	543709852	4.83905e+08	5.8735e+08	4.28132e+08	4.6743e+08	1.65493e+08	2.09021e+08	1.83683e+08	2.49344e+08	275874526	2.01319e+08	down
neg-0.884_120.04193	1.73544e+07	2.13295e+07	3.69801e+07	1.52593e+07	2.18831e+07	2.04727e+07	1.37128e+07	7.88731e+06	7.6341e+06	6.8107e+06	6.07848e+06	5.49043e+06	down
neg-1.264_102.03137	2.62366e+07	2.06252e+07	4.21326e+07	2.17926e+07	2.23745e+07	1.92126e+07	2.89191e+07	1.13796e+07	1.22575e+07	7.50782e+06	6.56516e+06	6.17095e+06	down
neg-1.33_268.08042	2.00247e+07	2.89596e+07	3.39667e+07	2.5976e+07	2.48133e+07	2.12269e+07	1.27298e+07	7.213e+06	8.93442e+06	1.05761e+07	9.24807e+06	7.4482e+06	down
pos-1.326_268.08014	4.65857e+06	7.91795e+06	9.19507e+06	6.70812e+06	6.44316e+06	4.09483e+06	2.73319e+06	1.68627e+06	2.03419e+06	2.25254e+06	1.96464e+06	2.23807e+06	down
neg-0.886_244.069	5.77159e+07	5.54436e+07	5.31376e+07	5.68059e+07	5.76825e+07	5.06481e+07	2.38999e+07	2.5961e+07	2.52335e+07	2.88119e+07	2.67514e+07	2.77648e+07	down
pos-2.889_145.1576	1.33376e+06	1.43415e+06	1.84158e+06	1.82451e+06	1.23544e+06	1.10433e+06	519146	392344	445747	333585	400731	335911	down
pos-0.903_526.14967	3.30187e+07	5.33781e+07	4.52881e+07	2.91804e+07	4.08484e+07	2.76359e+07	2.08001e+07	9.45637e+06	1.20467e+07	1.08478e+07	9.95915e+06	1.64256e+07	down
pos-1.238_526.14969	1.6657e+07	1.391e+07	1.78924e+07	1.71266e+07	2.33705e+07	1.82383e+07	1.16191e+07	8.30568e+06	7113568	4.98309e+06	9.44237e+06	8.45383e+06	down
neg-5.098_250.06199	1.94586e+06	2.23757e+06	2.08034e+06	1.97993e+06	1.79111e+06	1.86096e+06	675391	875197	814484	747093	860209	705108	down
pos-0.79_105.04214	1125337931	9.75138e+08	1121485038	9.20565e+08	8.75052e+08	8.48932e+08	4.52969e+08	3.02073e+08	2.82384e+08	2.77354e+08	264423034	2.689e+08	down
neg-0.835_166.0472	2.39785e+08	2.26961e+08	2.3829e+08	2.13368e+08	2.14325e+08	2.01103e+08	1.27549e+08	1.11467e+08	9.58958e+07	100229082	9.35156e+07	9.5936e+07	down
neg-3.796_150.01871	1.46121e+06	1.89894e+06	1.21727e+06	1.22539e+06	2.11283e+06	1.68688e+06	40303.4	191713	54520.1	80047.3	100084	126165	down
neg-4.154_150.01874	44197.6	93427.6	22243.2	61629.8	34605.2	81022.7	21634.4	21764.3	18264.4	18532	19192.4	18459.5	down
neg-4.716_150.01875	37143.8	30415.4	13579.2	19116.9	28005.3	34201.2	13011.1	16839.5	9528.68	11500.4	8392.84	14157.2	down
neg-0.787_128.05824	4.34067e+07	3.6234e+07	3.83363e+07	3.07162e+07	3.02067e+07	3.12769e+07	1.25588e+07	9.43347e+06	8.21282e+06	8.56824e+06	8.42932e+06	7.77334e+06	down
pos-3.252_226.09485	482064	474611	568868	536935	492553	516963	199146	304249	237219	219572	280848	231678	down
neg-3.861_282.10757	819289	1.10698e+06	1.31071e+06	1.20465e+06	1.18691e+06	1.02326e+06	468198	417175	404252	387196	363444	402297	down
pos-0.828_182.0795	2.07959e+06	1.97248e+06	1.99344e+06	2.34739e+06	2.81077e+06	2.37693e+06	969435	1.13817e+06	1.10516e+06	1.36886e+06	765773	948109	down
pos-3.844_232.12072	1.33606e+06	1.16063e+06	1.20166e+06	1.50644e+06	1.06802e+06	1.54704e+06	379949	115023	539357	654315	608986	599484	down
neg-3.796_165.04222	2.17436e+06	2.54264e+06	1.74732e+06	1.8087e+06	2.88204e+06	2.35463e+06	266382	203960	93189.1	135015	151065	203749	down
pos-3.787_165.04223	6.37657e+06	7.66643e+06	5.55025e+06	5.60771e+06	1.03494e+07	6.89345e+06	396187	1.4519e+06	736796	752140	1.0129e+06	725854	down
neg-9.345_300.26587	4.83523e+06	4.80285e+06	4.13318e+06	5.65166e+06	4.79361e+06	4.06485e+06	2.08508e+06	1.99612e+06	2.28324e+06	2.56463e+06	2.57469e+06	2.23621e+06	down
pos-0.853_471.15166	3.58005e+06	3.07125e+06	3.69009e+06	2.85797e+06	2.215e+06	3.14785e+06	936486	620641	962320	978450	803696	714743	down
neg-0.879_498.10855	1.48416e+07	1.09967e+07	1.36667e+07	1.03373e+07	1.06884e+07	1.23563e+07	3.23653e+06	1.92545e+06	2.14002e+06	2.49252e+06	2.67345e+06	2.12608e+06	down
pos-0.87_498.10794	1.49417e+07	1.89116e+07	1.76387e+07	14515265	1.54476e+07	1.44996e+07	2.15524e+06	1.70397e+06	2.55799e+06	2.56886e+06	2.04576e+06	1.91301e+06	down
neg-0.843_504.16845	7.30138e+08	601766589	6.7932e+08	5.12945e+08	5.6857e+08	5.96901e+08	3.26744e+08	2.07582e+08	2.09368e+08	191982261	1.70495e+08	1.75384e+08	down
neg-1.247_504.16864	2.16872e+08	2.13907e+08	2.04924e+08	1.90617e+08	1.90241e+08	1.95222e+08	9.15068e+07	79972446	6.77847e+07	8.60439e+07	7.33606e+07	7.14806e+07	down
pos-4.438_182.05751	2.36651e+06	1.90902e+06	492037	2.00082e+06	810113	548850	77175.3	367881	226144	593468	682559	774025	down
pos-1.26_167.05757	2.27901e+06	2.19379e+06	2.05576e+06	2.21251e+06	2.73641e+06	2.31768e+06	820578	1.1625e+06	1.13239e+06	1.03444e+06	872404	1.03019e+06	down
pos-4.183_378.0791	208868	218825	236629	165977	382281	359350	20277.7	74809.1	17948.3	17339.8	38834.7	59628.7	down
neg-0.794_129.04231	7.47377e+07	5.37314e+07	8.63043e+07	5.08552e+07	4.31487e+07	4.82891e+07	7.88683e+07	1.88932e+07	9.53347e+06	9.57115e+06	5.69334e+06	8.38652e+06	down
neg-0.815_221.08933	1.47068e+07	8.65801e+06	1.00048e+07	7.35826e+06	7.73223e+06	8.83397e+06	7.8491e+06	4.21816e+06	3.98019e+06	4.17704e+06	3.53953e+06	3.60717e+06	down
neg-0.927_125.99829	1.06589e+07	8.51201e+06	8.1692e+06	9.88406e+06	7.32049e+06	8.19035e+06	4.96797e+06	3.85405e+06	3.62332e+06	4.17333e+06	3.38993e+06	3.82415e+06	down
pos-0.815_258.08419	1.10979e+08	1.19117e+08	1.05659e+08	1.22818e+08	114747149	1.25247e+08	4.91972e+07	3.93017e+07	3.70231e+07	3.87191e+07	3.7439e+07	3.73868e+07	down
pos-0.813_275.11084	1.07771e+08	1.16325e+08	1.0236e+08	1.19989e+08	111775585	1.2221e+08	3.25011e+07	2.8953e+07	3.07484e+07	3.2951e+07	3.10031e+07	3.223e+07	down
neg-0.786_303.1425	4.03747e+06	3.5648e+06	3.82577e+06	3.05011e+06	3.53806e+06	3.69261e+06	1.70194e+06	853833	649049	723541	489799	598867	down
pos-0.78_303.14197	2.30525e+07	2.25243e+07	2.5262e+07	2.00122e+07	1.88053e+07	22243370	9.97878e+06	6.23379e+06	5.39934e+06	5.6599e+06	5.45707e+06	4.80532e+06	down
pos-1.266_426.08652	2.26115e+06	3.06545e+06	3.01691e+06	3.60285e+06	3.02244e+06	3.33179e+06	970259	816186	754024	618880	497503	374377	down
pos-2.486_181.03711	3.83021e+06	3.52571e+06	3.76208e+06	3.76503e+06	3.24261e+06	3.61472e+06	842581	671072	629338	712769	581479	568058	down
pos-3.597_181.03716	5.85735e+07	6.33139e+07	4.44949e+07	4.47288e+07	6.16366e+07	5.90348e+07	376921	3.28469e+06	1.39183e+06	1.4614e+06	3.08976e+06	2.01185e+06	down
pos-0.834_111.99224	1.46601e+08	1.66402e+08	1.8596e+08	2.35046e+08	148806174	1.31042e+08	3.61865e+07	7.29462e+07	6.45021e+07	7.22824e+07	6.63074e+07	7.52288e+07	down
pos-0.933_111.99225	1.45825e+08	1.64046e+08	1.46891e+08	1.80092e+08	1.3632e+08	9.71941e+07	4.32697e+07	8.97544e+07	6.8731e+07	7.50183e+07	5.82959e+07	6.89484e+07	down
pos-1.248_653.21851	5.07404e+06	4.74928e+06	3.93871e+06	4.74462e+06	5.25746e+06	5.08439e+06	1.56861e+06	1.88146e+06	2.27886e+06	2.06966e+06	2.89749e+06	2.13509e+06	down
pos-3.431_424.14745	2.77308e+06	2.2193e+06	2.03479e+06	2.29643e+06	2.1226e+06	2.20872e+06	306778	1.06054e+06	853730	861669	725797	834446	down
pos-5.075_412.11229	1.29728e+06	1.74082e+06	1.44664e+06	1.57438e+06	1.5321e+06	1.63988e+06	297394	513228	647960	662291	730072	613743	down
pos-3.596_396.00089	1.14673e+06	1.21045e+06	882862	749610	1.01342e+06	1.14875e+06	87550.4	138188	101082	74134.2	95517.3	92887.2	down
pos-4.867_250.09868	1.32576e+06	1.21879e+06	1.07444e+06	1.43874e+06	1.60014e+06	1.82347e+06	202568	426486	446931	458194	428605	389197	down
neg-4.757_380.17335	2.23661e+06	1.63016e+06	1.3312e+06	2.27579e+06	2.05947e+06	1.45734e+06	329344	753582	673662	672045	1.71012e+06	820333	down
pos-4.75_380.17249	1.69039e+07	1.22168e+07	9.79228e+06	1.43635e+07	1.36157e+07	1.03206e+07	2.6831e+06	5.6875e+06	4.77038e+06	5.57132e+06	1.11577e+07	4.79815e+06	down
neg-4.153_570.1944	4.49162e+06	4.01804e+06	5.29514e+06	4.07536e+06	4.12286e+06	4.86445e+06	1.82793e+06	2.02432e+06	1.50353e+06	1.66566e+06	1.6023e+06	1.3407e+06	down
pos-0.903_542.1233	8.76388e+07	9.4006e+07	9.47604e+07	7.81453e+07	8.11341e+07	9.33844e+07	3.27098e+07	3.2492e+07	2.80654e+07	3.66802e+07	4.18948e+07	3.71957e+07	down
pos-1.238_542.1233	1.84444e+07	1.06184e+07	1.84746e+07	1.81246e+07	1.82356e+07	1.88398e+07	7.85868e+06	9.25835e+06	6.05741e+06	8.91381e+06	7.67957e+06	8.77691e+06	down
pos-3.971_528.16181	683776	963805	848513	556832	718989	763342	112274	91012.5	94879.7	111371	89663.2	97073.6	down
pos-4.34_528.16198	1.58673e+06	1.9643e+06	2.10405e+06	1.55257e+06	1.79023e+06	2.02786e+06	185616	173204	127911	130628	119305	89426.6	down
pos-6.085_350.07799	2.21669e+06	1.1542e+06	748452	2.21123e+06	1.88089e+06	1.01674e+06	127438	340358	187815	292913	261720	296750	down
pos-6.17_350.07803	3.84995e+06	2.94075e+06	2.17487e+06	3.076e+06	3.24746e+06	2.63576e+06	166858	522597	472964	525664	464880	502028	down
neg-1.095_380.08928	7.7228e+07	6.51417e+07	7.31732e+07	67445265	6.4936e+07	7.10021e+07	4.98454e+07	2.96001e+07	3.56324e+07	2.97892e+07	2.78103e+07	1.80943e+07	down
neg-3.797_431.05897	278577	324248	241829	254471	437494	364433	37144.2	26474.8	48020.1	28183.6	15806.7	15851.4	down
pos-0.868_345.11606	4.34033e+06	5.30496e+06	6.27047e+06	4.3749e+06	5.6492e+06	5.1326e+06	3.45127e+06	2.82019e+06	2.43753e+06	2.18752e+06	1.89421e+06	2.57667e+06	down
pos-2.754_439.16822	3.93898e+07	4.83342e+07	4.99142e+07	5.09958e+07	4.10257e+07	4.86923e+07	2.1416e+07	2.11927e+07	1.6527e+07	1.88607e+07	2.0728e+07	1.44415e+07	down
pos-5.558_194.05747	8.1782e+07	5.91982e+07	2.96394e+07	5.55835e+07	5.57867e+07	3.69819e+07	4.6108e+06	1.35725e+07	6.7144e+06	8.70343e+06	6.74057e+06	7.09351e+06	down
neg-1.245_568.16786	1.39091e+06	1.26137e+06	1.56482e+06	1.27882e+06	1.46853e+06	1.50647e+06	743541	619649	488184	633720	542456	656253	down
neg-2.774_422.14194	8.19909e+07	8.51741e+07	9.48108e+07	8.51257e+07	6.84766e+07	7.99307e+07	3.93195e+07	2.77124e+07	2.38986e+07	3.30358e+07	2.52662e+07	3.11784e+07	down
pos-4.867_144.05716	808552	820047	824028	855128	1.16645e+06	1.16217e+06	109816	272828	260575	262535	252990	218423	down
neg-1.978_139.06299	1.22248e+07	1.28116e+07	1.22445e+07	1.53601e+07	1.47789e+07	1.21089e+07	1.2617e+06	3.96285e+06	4.68493e+06	3.72857e+06	4.68161e+06	3.9565e+06	down
neg-2.288_139.06298	4.4288e+07	4.07267e+07	4.6965e+07	4.86253e+07	4.15446e+07	3.8661e+07	1.08964e+07	7.6176e+06	8.27821e+06	8.06284e+06	5.6199e+06	7.09445e+06	down
neg-2.493_139.06298	8.90099e+07	8.1897e+07	9.18189e+07	7.85305e+07	7.27248e+07	7.73639e+07	1.97099e+07	1.46012e+07	1.49056e+07	1.44917e+07	1.33526e+07	1.52272e+07	down
pos-4.601_544.15691	435333	369302	358493	362475	350513	311931	22812.7	79133.9	72035.1	42404.6	162284	113772	down
neg-3.61_343.08973	5.23724e+07	5.5923e+07	3.84255e+07	4.26214e+07	4.98059e+07	5.27186e+07	1.2613e+06	3.43316e+06	1.94136e+06	1.86786e+06	2.92142e+06	2.37261e+06	down
pos-3.595_343.08954	1.22204e+07	1.34693e+07	9.18063e+06	8.7025e+06	1.1885e+07	1.04864e+07	185675	524476	269455	307647	546627	394497	down
neg-1.729_160.03668	3.45549e+06	3.68713e+06	6.06068e+06	3.12744e+06	1.92958e+06	1.33739e+06	1.74076e+06	2.17158e+06	1.13034e+06	1.41666e+06	1.16496e+06	1.20234e+06	down
neg-2.123_154.02626	5.03595e+06	6.34133e+06	4.62692e+06	7.24209e+06	4.56183e+06	6.31747e+06	1.6439e+06	2.66694e+06	3.12347e+06	3.22825e+06	3.07493e+06	3.06102e+06	down
pos-1.992_328.05517	3.71904e+07	3.60182e+07	3.99738e+07	3.78937e+07	3.05356e+07	3.48775e+07	1.41847e+07	7.14637e+06	7.68418e+06	8.15903e+06	9.25022e+06	8.54879e+06	down
pos-5.557_250.08336	1.59887e+07	1.26202e+07	6.73177e+06	1.14437e+07	1.0316e+07	7.81429e+06	607222	2.67019e+06	1.01349e+06	2.07947e+06	1.52064e+06	1.24341e+06	down
pos-5.654_250.08335	3.13012e+06	2.46354e+06	1.29226e+06	2.7105e+06	2.03377e+06	1.35002e+06	133204	281072	215253	642179	467126	464319	down
neg-3.197_392.13148	1.60391e+07	2.07637e+07	1.96881e+07	1.90157e+07	1.6404e+07	1.26336e+07	5.98305e+06	6.24445e+06	4.75445e+06	5.04592e+06	4.6915e+06	4.98405e+06	down
pos-3.603_464.21493	1.44131e+06	1.72277e+06	1.36411e+06	1.30428e+06	1.69699e+06	1.22041e+06	412110	629951	599908	698520	649577	476377	down
pos-5.617_338.11453	691771	591941	515364	720795	771970	627104	103854	189533	192889	171238	211153	178151	down
pos-6.255_281.27088	8.62815e+06	1.05825e+07	8.96634e+06	1.14275e+07	1.25513e+07	1.39077e+07	6.88513e+06	6.58753e+06	1.16739e+06	1.10611e+07	1.17823e+06	1.20493e+06	down
neg-0.86_100.01565	3.0213e+07	3.16678e+07	5.9193e+07	2.99221e+07	2.92487e+07	2.39504e+07	3.70515e+07	1.39233e+07	1.10125e+07	1.04868e+07	8.9816e+06	11624648	down
neg-5.486_332.25587	4.32665e+06	5.54863e+06	4.02818e+06	5.26151e+06	5.32916e+06	4.90123e+06	1.10166e+06	2.53886e+06	2.16057e+06	2.2127e+06	3.25512e+06	2.57859e+06	down
neg-1.522_635.08704	4.65341e+06	3.57986e+06	4.73709e+06	3.44124e+06	3.35084e+06	2.9521e+06	488408	103636	197899	194892	156578	259877	down
pos-4.538_410.18297	464613	341861	181287	332626	554713	361400	19888.6	61597.9	48719.2	83170	61118.5	52691	down
pos-4.086_396.16764	1.49011e+06	2.07831e+06	928190	1.8467e+06	3.1674e+06	2.3659e+06	607640	582501	531305	740037	616235	791203	down
pos-4.184_194.04488	129847	133426	158972	95029.4	178097	169935	21242.5	54246.8	19839.8	18164.8	27571.7	50499.5	down
neg-3.609_109.05249	260647	354959	178408	197071	222707	344521	129664	106754	102183	119637	15090.8	27343.8	down
neg-4.445_181.04961	416609	512545	647907	443090	441291	584246	240337	289959	220910	203310	156751	164988	down
pos-4.073_513.26092	1.68556e+06	1.19015e+06	1.73971e+06	961756	1.21013e+06	1.25376e+06	1.23649e+06	576787	592999	429133	398500	448165	down
pos-0.81_133.03708	1.07907e+07	5.57862e+06	6.1892e+06	5.4953e+06	4.91213e+06	6.17999e+06	2.63394e+07	1.16952e+07	1.14108e+07	9.54719e+06	8.62585e+06	1.07407e+07	up
pos-3.501_138.07887	1149244955	1193869304	1125114042	1248303097	1067785968	1108732176	1358862487	3008611632	2558589935	2002317071	2484528692	2461525592	up
neg-4.809_353.18355	754836	553988	444818	537923	496508	442689	1.24455e+06	1.01997e+06	1.13855e+06	980258	1.15662e+06	1.02806e+06	up
pos-0.772_240.02294	6.69499e+06	6.57757e+06	4.09884e+06	6.25561e+06	5.94787e+06	7.49391e+06	1.12184e+07	1.02098e+07	1.14719e+07	1.31716e+07	1.39796e+07	1.57776e+07	up
neg-0.806_454.0721	3.45382e+06	4.63781e+06	6.84904e+06	3.82106e+06	5.49419e+06	5.02536e+06	1.67544e+07	7.05051e+06	9.94839e+06	9.35613e+06	8.06873e+06	8.85349e+06	up
pos-4.799_353.18259	618694	447389	394933	396067	440099	361771	1.08504e+06	800940	960553	913012	1.03191e+06	876891	up
pos-0.954_167.98189	2.92858e+06	1.91945e+06	3.32627e+06	2.07328e+06	2.31013e+06	2.37079e+06	1.31022e+07	4.55843e+06	3.92057e+06	3.48924e+06	3.9182e+06	2.92819e+06	up
neg-3.324_290.13756	7.53061e+06	4.66282e+06	4.07797e+06	5.7724e+06	5.43403e+06	5.06301e+06	5.73182e+06	1.93664e+07	4.55958e+06	1.11012e+07	1.76769e+07	1.50298e+07	up
pos-4.005_251.07868	123994	150207	158603	159145	158346	143650	481924	337530	350077	324823	343234	323240	up
pos-7.36_266.22383	259301	163495	239966	303076	349163	339667	537905	639678	905393	771425	788423	763151	up
pos-7.877_290.2602	152226	321013	196289	871701	190490	364733	323627	1.68266e+06	1.41493e+06	1.1048e+06	2.29637e+06	1.18711e+06	up
pos-7.876_272.24961	102963	258676	151794	756578	130653	308003	295659	1.56513e+06	1.33234e+06	1.01166e+06	2.11819e+06	1.10385e+06	up
neg-0.878_352.06365	373309	937898	472887	997721	699344	679297	5.29762e+06	4.96875e+06	6.65656e+06	4.9769e+06	4.86112e+06	6.20183e+06	up
pos-3.576_181.07345	572446	763299	614806	1.00881e+06	631551	1.2116e+06	972435	2.88756e+06	1.82717e+06	1.64304e+06	1.3256e+06	1.33537e+06	up
pos-2.056_244.08746	3.26932e+06	3.06634e+06	3.01653e+06	3.3569e+06	4.20219e+06	3.55759e+06	2.13144e+07	2.07316e+07	1.93589e+07	1.94485e+07	1.88308e+07	1.86095e+07	up
neg-4.513_116.01065	41039.5	134413	45079.1	56843.6	30819.6	32558.2	846816	988812	833555	816519	961217	856415	up
neg-0.729_155.06912	8.87668e+07	9.95003e+07	8.45432e+07	9.30811e+07	9.34893e+07	9.39465e+07	2.26923e+08	2.38606e+08	2.4677e+08	2.38912e+08	2.30436e+08	2.32719e+08	up
pos-0.697_155.06904	1.85316e+08	2.01158e+08	1.65777e+08	1.96662e+08	1.91233e+08	1.99371e+08	4.60124e+08	4.6394e+08	4.69687e+08	4.71001e+08	4.81089e+08	5.0323e+08	up
pos-0.891_155.06904	1.20099e+07	1.13448e+07	9.97532e+06	7.22805e+06	1.08605e+07	7.08625e+06	2.07484e+07	2.43915e+07	2.32515e+07	2.68607e+07	2.46731e+07	2.41145e+07	up
pos-0.663_130.1215	8.63675e+07	6.09027e+07	9.87931e+07	1.02814e+08	8.17987e+07	9.01747e+07	2.86313e+08	1.99942e+08	2.52454e+08	223689579	2.86402e+08	2.33755e+08	up
neg-4.512_122.0365	1.18891e+07	418761	611783	813855	343813	475885	1.3557e+07	2.55427e+07	2.24251e+07	2.27782e+07	2.33068e+07	2.08112e+07	up
pos-7.788_286.2287	524031	263932	593102	589948	379079	629856	1.21215e+06	2.9765e+06	2.44504e+06	2.86303e+06	2.80101e+06	2.14154e+06	up
pos-7.897_286.22876	91111.5	62687.3	69924.9	137011	73567.5	87304.1	357218	499988	351505	457536	483446	334054	up
neg-0.825_196.05771	1.56778e+08	1.45027e+08	1.45016e+08	1.25214e+08	1.34856e+08	1.47138e+08	1453053648	9.15432e+08	8.98065e+08	9.53887e+08	8.83599e+08	8.76409e+08	up
neg-0.825_192.06298	1.18082e+08	181489900	1.45771e+08	1.3081e+08	1.0634e+08	1.80973e+08	1693559720	1076892956	1080545111	1100382010	1024019305	1093860697	up
neg-0.834_104.01065	4.58339e+07	3.50799e+07	3.85865e+07	3.45041e+07	3.33929e+07	2.923e+07	2.11623e+08	1.0706e+08	1.09265e+08	8.97456e+07	1.01386e+08	113449834	up
neg-1.267_152.03298	984998	735414	778224	608474	540385	484248	3.08791e+06	1.89669e+06	2.06283e+06	2.67246e+06	2.35227e+06	1.86824e+06	up
neg-0.724_111.07945	775734	749379	612321	716519	763636	1.00696e+06	1.63761e+06	2.02051e+06	2.19601e+06	2.04951e+06	1.85695e+06	2.03263e+06	up
neg-0.793_276.1316	1.02384e+07	9.9364e+06	6.80483e+06	7.20787e+06	6.64663e+06	1.05084e+07	3.71859e+07	2.23616e+07	2.1555e+07	1.73787e+07	1.52615e+07	1.56511e+07	up
pos-0.778_276.13122	3.79037e+06	2.99328e+06	2.57551e+06	2.65475e+06	2.07367e+06	2.15935e+06	5.9152e+07	2.27467e+07	2.46817e+07	2.13467e+07	1.9109e+07	1.71076e+07	up
neg-3.285_120.05718	4.23272e+06	3.56448e+06	3.89656e+06	5.44008e+06	3.97122e+06	4.08357e+06	6.4483e+06	2.08963e+07	1.43675e+07	1.45246e+07	1.94621e+07	1.71287e+07	up
[truncated: 123 more rows]

## Sheet: S9
Table S9. Differentially accumulated metabolites between CK2 and T2
[truncated: 305 more rows]
